# Supplementary material
Source: publisher figshare collection journal article supplement (https://future-science-group.figshare.com/ndownloader/files/28413186)
Supplement: Supplementary file 1 [file 28413186]

## Sheet: Sheet3
Supplementary Table 5 The potential target mRNAs of identified differentially expressed lncRNAs
lncRNA_class	distance	Overlap_class	lncRNA	mRNA	lncRNA_chr	lncRNA_start	lncRNA_end	lncRNA_length	lncRNA_chain	mRNA_chr	mRNA_start	mRNA_end	mRNA_length	mRNA_chain	minimum_free_energy_of_RNAplex	Pearson_correlation	Spearman_correlation	N1-FPKM_lncRNA	T1-FPKM_lncRNA	N3-FPKM_lncRNA	N2-FPKM_lncRNA	T3-FPKM_lncRNA	T4-FPKM_lncRNA	N5-FPKM_lncRNA	T5-FPKM_lncRNA	T2-FPKM_lncRNA	N4-FPKM_lncRNA	N1-FPKM_mRNA	T1-FPKM_mRNA	N3-FPKM_mRNA	N2-FPKM_mRNA	T3-FPKM_mRNA	T4-FPKM_mRNA	N5-FPKM_mRNA	T5-FPKM_mRNA	T2-FPKM_mRNA	N4-FPKM_mRNA
tran	NA	NA	LTCONS_00000198	NM_014783.4	NW_012132920.1	1893653	1904185	2350	-	chr15	32615490	32639949	5898	+	-1222.72	0.9822	0.6687	0.22	0.31	0.15	0.26	0.59	2.56	0.27	0.29	0.15	0.46	0.47	0.93	0.16	0	1.05	7.22	0.09	1.19	0.4	0.43
tran	NA	NA	LTCONS_00000291	XM_017010106.1	NW_016107297.1	129041	130089	1049	+	chr5	71214488	71217994	3507	-	-636.22	0.6947	0.8061	1.82	1.4	3.15	0.66	4.27	16.02	3.92	5.32	0.76	4.01	1.98	1.3	5.66	2.13	10.98	9.52	5.33	6.65	2.01	4.77
tran	NA	NA	LTCONS_00000291	XM_017010107.1	NW_016107297.1	129041	130089	1049	+	chr5	71232509	71236015	3507	-	-637.05	0.9693	0.8283	1.82	1.4	3.15	0.66	4.27	16.02	3.92	5.32	0.76	4.01	0	0.05	0.41	0	0.64	1.62	0.47	0.39	0	0.29
tran	NA	NA	LTCONS_00000291	XM_017010108.1	NW_016107297.1	129041	130089	1049	+	chr5	70528550	70532057	3508	-	-637.05	0.7339	0.8788	1.82	1.4	3.15	0.66	4.27	16.02	3.92	5.32	0.76	4.01	0.26	0.29	0.5	0.31	1.35	1.61	0.96	1.43	0.49	1.37
cis_mRNA_up10k	3340	NA	LTCONS_00000356	MTCONS_00000355	NW_017852933.1	289897	296695	1334	-	NW_017852933.1	269337	286558	2949	-	*	0.9684	0.6485	0.25	0.33	1.14	0.82	2.56	1.7	2.3	11.78	0.51	0.97	5.15	2.41	6.48	6.37	14.1	5.26	6.23	33.97	7.71	5.55
tran	1287681	NA	LTCONS_00000356	MTCONS_00000349	NW_017852933.1	289897	296695	1334	-	NW_017852933.1	1584375	1663048	9997	+	-771.32	0.9862	0.8788	0.25	0.33	1.14	0.82	2.56	1.7	2.3	11.78	0.51	0.97	1.51	0.51	2.14	1.3	3.3	5.84	3.89	22.14	1.1	1.84
tran	1305866	NA	LTCONS_00000356	MTCONS_00000350	NW_017852933.1	289897	296695	1334	-	NW_017852933.1	1602560	1663048	9864	+	-771.32	0.7831	0.8545	0.25	0.33	1.14	0.82	2.56	1.7	2.3	11.78	0.51	0.97	0.43	0.58	1.62	1.74	3.04	2.13	2.45	4.52	1.46	3.24
tran	NA	NA	LTCONS_00000356	MTCONS_00115200	NW_017852933.1	289897	296695	1334	-	chr16	21445552	21473252	7228	-	-673.41	0.9837	0.9152	0.25	0.33	1.14	0.82	2.56	1.7	2.3	11.78	0.51	0.97	1.46	0.55	3.32	0.98	5.87	4.3	5.83	17.66	1.14	2.36
tran	934247	NA	LTCONS_00000361	MTCONS_00000350	NW_017852933.1	639890	668314	4189	-	NW_017852933.1	1602560	1663048	9864	+	-2749.68	0.8148	0.7576	0.54	0.2	1.81	0.41	2.81	2.76	1.92	8.74	0.4	1.33	0.43	0.58	1.62	1.74	3.04	2.13	2.45	4.52	1.46	3.24
tran	NA	NA	LTCONS_00000361	MTCONS_00115204	NW_017852933.1	639890	668314	4189	-	chr16	21475501	21520398	2279	-	-1533.68	0.9492	0.7939	0.54	0.2	1.81	0.41	2.81	2.76	1.92	8.74	0.4	1.33	0	0.12	0.56	0.42	0.67	0.34	0.6	5.58	0.29	0.43
cis_mRNA_overlap	0	Lnc-AntiCompleteIn-mRNAIntron	LTCONS_00001553	MTCONS_00016887	chr1	9182004	9198866	7553	+	chr1	9036941	9572901	3058	-	*	0.7082	0.7496	0	0	0	0	0.04	0	0	0.04	0	0	0.1	0	0	0	0.11	0	0	0.07	0	0
cis_mRNA_overlap	0	Lnc-AntiOverlap-mRNA	LTCONS_00002844	NM_001031680.2	chr1	24932454	24966179	17926	+	chr1	24899511	24965010	4340	-	*	0.6804	0.7309	0.02	0	0.01	0.02	0.01	0.01	0.01	0	0	0	0.11	0	0	0.12	0	0.09	0.18	0	0	0
cis_mRNA_overlap	0	Lnc-AntiOverlap-mRNA	LTCONS_00003678	XM_017000522.1	chr1	33350073	33378604	13698	+	chr1	33331370	33430649	2648	-	*	0.8791	0.6532	0	0	0	0	0	0.01	0	0.02	0	0	0.03	0	0.01	0.03	0.01	0.03	0.01	0.08	0.01	0
cis_mRNA_overlap	0	Lnc-Overlap-mRNA	LTCONS_00004408	XM_011540800.1	chr1	42958277	43196506	21306	+	chr1	43172350	43234358	3398	+	*	0.8629	0.7127	0.01	0	0.01	0	0.01	0	0	0.04	0	0	0.02	0	0	0	0	0	0	0.03	0	0
cis_mRNA_overlap	0	mRNA-CompleteIn-LncIntron	LTCONS_00004408	XM_017001322.1	chr1	42958277	43196506	21306	+	chr1	43142959	43156396	2620	+	*	0.6055	0.8478	0.01	0	0.01	0	0.01	0	0	0.04	0	0	0.01	0	0.01	0	0.16	0	0.01	0.1	0	0
cis_mRNA_up10k	1637	NA	LTCONS_00004430	NM_001101376.2	chr1	43142959	43146287	3059	+	chr1	43147923	43156396	517	+	*	0.6789	0.6881	0	0	0	0	0.09	0.52	0	0.06	0	0	0.05	0	0	0	0.3	0.24	0	0	0	0
cis_mRNA_up10k	808	NA	LTCONS_00004430	XM_005270875.4	chr1	43142959	43146287	3059	+	chr1	43147094	43156396	1394	+	*	0.9925	0.8131	0	0	0	0	0.09	0.52	0	0.06	0	0	0	0.02	0	0.02	0.07	0.32	0	0.03	0.03	0
cis_mRNA_up10k	303	NA	LTCONS_00004972	NM_003035.2	chr1	47314449	47314897	449	+	chr1	47250139	47314147	5016	-	*	0.8545	0.6928	0.14	0.14	0	0	0.55	1.09	0	1.41	0	0	0	0.1	0	0	0.4	1.12	0.24	0.62	0.16	0
cis_mRNA_up10k	303	NA	LTCONS_00004972	XM_011541994.2	chr1	47314449	47314897	449	+	chr1	47251136	47314147	3968	-	*	0.7588	0.6021	0.14	0.14	0	0	0.55	1.09	0	1.41	0	0	0	0	0.08	0	0.54	0.37	0	0.32	0.03	0
cis_mRNA_up10k	7751	NA	LTCONS_00005141	XM_017000222.1	chr1	51608492	51609342	851	+	chr1	51617092	51788465	3090	+	*	0.712	0.6112	0.06	0	0.18	0	0.04	0.08	0.08	0	0.06	0.95	0.68	0.34	1.04	0.49	0.36	0.3	0.66	0.35	0.75	1.12
cis_mRNA_up10k	1422	NA	LTCONS_00005509	MTCONS_00020557	chr1	56967561	56972639	310	+	chr1	56929210	56966140	2055	-	*	0.6167	0.6322	1.16	0.27	1.47	0.12	0	0.16	2.72	0	0.58	1.63	85.41	47.26	76.47	132.52	50.92	26.88	136.69	14.07	71.55	80.13
cis_mRNA_up10k	1422	NA	LTCONS_00005509	NM_001278543.1	chr1	56967561	56972639	310	+	chr1	56929210	56966140	2384	-	*	0.7737	0.845	1.16	0.27	1.47	0.12	0	0.16	2.72	0	0.58	1.63	5.93	2.03	10.65	10.01	1.42	0.66	11.8	0.24	2.49	10.85
cis_mRNA_up10k	1422	NA	LTCONS_00005509	NM_001278544.1	chr1	56967561	56972639	310	+	chr1	56929210	56966140	2291	-	*	0.7097	0.7173	1.16	0.27	1.47	0.12	0	0.16	2.72	0	0.58	1.63	18.88	9.44	21.93	27.18	4.6	4.86	26.61	1.06	10.97	33.38
cis_mRNA_up10k	7592	NA	LTCONS_00005510	MTCONS_00020557	chr1	56973731	56979376	5646	+	chr1	56929210	56966140	2055	-	*	0.643	0.7818	0.47	0.11	0.78	0.46	0.16	0.37	0.84	0.02	0.06	0.79	85.41	47.26	76.47	132.52	50.92	26.88	136.69	14.07	71.55	80.13
cis_mRNA_up10k	7592	NA	LTCONS_00005510	NM_000066.3	chr1	56973731	56979376	5646	+	chr1	56929210	56966140	2162	-	*	0.7466	0.7455	0.47	0.11	0.78	0.46	0.16	0.37	0.84	0.02	0.06	0.79	127.29	70.05	105.1	185.04	26.77	12.68	160.63	9.04	57.04	172.64
cis_mRNA_up10k	7592	NA	LTCONS_00005510	NM_001278543.1	chr1	56973731	56979376	5646	+	chr1	56929210	56966140	2384	-	*	0.9044	0.8667	0.47	0.11	0.78	0.46	0.16	0.37	0.84	0.02	0.06	0.79	5.93	2.03	10.65	10.01	1.42	0.66	11.8	0.24	2.49	10.85
cis_mRNA_up10k	7592	NA	LTCONS_00005510	NM_001278544.1	chr1	56973731	56979376	5646	+	chr1	56929210	56966140	2291	-	*	0.8449	0.7939	0.47	0.11	0.78	0.46	0.16	0.37	0.84	0.02	0.06	0.79	18.88	9.44	21.93	27.18	4.6	4.86	26.61	1.06	10.97	33.38
cis_mRNA_overlap	0	Lnc-Overlap-mRNA	LTCONS_00005976	XM_017001445.1	chr1	66257309	66267990	1673	+	chr1	66257431	66374576	3707	+	*	0.9472	0.7006	0.1	0.03	0.05	0.17	0.37	0.04	0.19	0.02	0.84	0	0	0	0	0	0.1	0	0	0	0.61	0
cis_mRNA_dw20k	4364	NA	LTCONS_00006603	NM_001304725.1	chr1	78142812	78144211	1400	+	chr1	78044962	78138449	3547	+	*	0.8329	0.7669	0.59	0.12	1.58	0.41	0.72	1.01	1.49	0.09	0.49	2.49	1.94	0	0.99	0	0.23	0.71	2.05	0	1.06	3.78
cis_mRNA_dw20k	5885	NA	LTCONS_00006604	NM_001304725.1	chr1	78144333	78149769	5437	+	chr1	78044962	78138449	3547	+	*	0.8379	0.7424	0.63	0.21	1.7	0.51	1.01	1.51	1.84	0.43	0.48	4.15	1.94	0	0.99	0	0.23	0.71	2.05	0	1.06	3.78
cis_mRNA_dw20k	1330	NA	LTCONS_00006717	XM_017000796.1	chr1	81993123	81994803	1681	+	chr1	81800972	81991794	5150	+	*	0.8874	0.9605	0.72	0.44	0.66	0.44	0.17	0.15	0.56	0.13	0.05	0.76	1.41	1.18	1.45	1.29	0.88	0.99	1.34	0.42	0.69	2.16
cis_mRNA_dw20k	164	NA	LTCONS_00007322	XM_011541261.2	chr1	93879205	93885048	2944	+	chr1	93885211	93909026	4840	-	*	0.6706	0.6646	0.05	0	0.07	0.03	0.08	0.31	0	0.25	0.05	0.12	3.12	6	4.29	2.44	7.09	8.4	2.09	12.99	8.35	3.16
cis_mRNA_dw20k	2605	NA	LTCONS_00008285	NM_001201545.1	chr1	110349285	110365334	16007	+	chr1	110339323	110346681	3320	+	*	0.9846	0.8693	0.52	0.52	1.49	0.38	2.06	6.34	1.41	3.53	0.88	1.71	4.01	3.21	4.96	2.43	5.64	15.32	4.52	8.98	2.79	4
cis_mRNA_dw20k	2605	NA	LTCONS_00008285	NM_022768.4	chr1	110349285	110365334	16007	+	chr1	110339323	110346681	3431	+	*	0.6881	0.7477	0.52	0.52	1.49	0.38	2.06	6.34	1.41	3.53	0.88	1.71	1.59	0.74	1.54	0.78	2.52	2.55	1.52	3.98	1.28	1.2
cis_mRNA_dw20k	19052	NA	LTCONS_00008286	NM_001201545.1	chr1	110365732	110367603	1872	+	chr1	110339323	110346681	3320	+	*	0.9769	0.8061	0.47	0.91	2.06	0.57	2.77	8.92	1.2	4.36	1.15	2.42	4.01	3.21	4.96	2.43	5.64	15.32	4.52	8.98	2.79	4
cis_mRNA_dw20k	19052	NA	LTCONS_00008286	NM_022768.4	chr1	110365732	110367603	1872	+	chr1	110339323	110346681	3431	+	*	0.6311	0.6485	0.47	0.91	2.06	0.57	2.77	8.92	1.2	4.36	1.15	2.42	1.59	0.74	1.54	0.78	2.52	2.55	1.52	3.98	1.28	1.2
cis_mRNA_overlap	0	Lnc-Overlap-mRNA	LTCONS_00008372	NM_000560.3	chr1	110871199	110892044	807	+	chr1	110873100	110899936	1567	+	*	0.6372	0.7301	0.3	0.25	0.47	0.96	0	0	0.93	0	0.16	0.2	9.73	12.98	10.82	9.74	2.54	6.62	13.32	5	3.34	10.66
tran	NA	NA	LTCONS_00009078	XM_017005465.1	chr1	144716079	144758724	1095	+	chr2	89562334	89585961	1121	-	-560.01	0.7202	0.7547	0	0.06	0.03	0.04	2.07	1.36	0.05	0	0.17	0	0.25	0.08	0.07	0.16	0.5	1.05	0.14	0.03	0.48	0
cis_mRNA_overlap	0	Lnc-AntiOverlap-mRNA	LTCONS_00009998	XM_017002035.1	chr1	153633982	153646306	7601	+	chr1	153618799	153634066	988	-	*	0.9857	0.7093	0.12	0	0.08	0.29	0.19	0.41	0.2	1.94	0	0	0	0	0	0	0	0.02	0	0.15	0	0
cis_mRNA_dw20k	15483	NA	LTCONS_00009999	NM_004515.3	chr1	153633982	153646306	8398	+	chr1	153661788	153671028	1887	-	*	0.9535	0.8528	0.31	0.14	0	0.13	0.71	1.87	0	0.6	0.74	0	23.51	29.91	19.88	15.32	40.44	133.17	21.37	58.09	39.61	19.87
cis_mRNA_dw20k	10928	NA	LTCONS_00010171	XM_011509154.1	chr1	154559074	154560097	1024	+	chr1	154502947	154548147	1876	+	*	0.7503	0.6027	0.05	0.38	0.09	0.05	0.13	1.28	0.12	0.3	0.07	0.11	0	0.09	0	0	0	0.21	0.07	0	0	0.15
cis_mRNA_up10k	431	NA	LTCONS_00010171	NM_017582.6	chr1	154559074	154560097	1024	+	chr1	154548575	154558644	3223	-	*	0.8875	0.7052	0.05	0.38	0.09	0.05	0.13	1.28	0.12	0.3	0.07	0.11	6.97	7.16	6.06	5.17	12.67	21.79	6.63	12.02	7.86	7.07
cis_mRNA_overlap	0	Lnc-Overlap-mRNA	LTCONS_00010227	NM_004952.4	chr1	155085489	155087538	1424	+	chr1	155078872	155087538	1782	+	-1030.08	0.6272	0.7622	0.19	0.84	0.07	0.14	1.22	0.64	0.46	1.19	0.84	0.19	0.05	0.19	0.07	0.04	0.12	0.38	0.1	0.42	0.13	0.06
cis_mRNA_up10k	9587	NA	LTCONS_00010442	NM_001093725.1	chr1	156091584	156091884	301	+	chr1	156072013	156081998	6124	-	*	0.6368	0.8003	0	0	0	0	0.34	1.18	0	0.35	0	0	0.09	0.04	0.1	0.06	0.37	0.86	0.13	1.51	0.05	0.13
cis_mRNA_dw20k	4469	NA	LTCONS_00010453	XM_011509534.1	chr1	156144549	156147361	2813	+	chr1	156130617	156140081	2654	+	*	0.661	0.8354	0.44	0.03	0.04	0.22	0.11	0.11	0.56	0.09	0.01	0.06	0.9	0	0	0.65	0.6	0.62	0.53	0.46	0.12	0.15
cis_mRNA_up10k	7188	NA	LTCONS_00010453	XM_017002056.1	chr1	156144549	156147361	2813	+	chr1	156154548	156177746	3066	+	*	0.8715	0.6444	0.44	0.03	0.04	0.22	0.11	0.11	0.56	0.09	0.01	0.06	0.68	0.37	0.54	0.59	0.35	0.19	1.09	0.22	0.09	0.31
cis_mRNA_dw20k	14964	NA	LTCONS_00010573	MTCONS_00010561	chr1	156751923	156753613	1691	+	chr1	156728471	156736960	1749	+	*	0.9641	0.7028	0.06	0.17	0.05	0.05	0.42	1	0.1	0.25	0.03	0.2	0	0	0	0	0.22	0.92	0	0	0	0
cis_mRNA_dw20k	14964	NA	LTCONS_00010573	XM_005245236.4	chr1	156751923	156753613	1691	+	chr1	156728686	156736960	1613	+	*	0.8693	0.7134	0.06	0.17	0.05	0.05	0.42	1	0.1	0.25	0.03	0.2	0.25	0	0.68	0.11	1.34	2.24	1.07	0.93	0	0.6
cis_mRNA_dw20k	14964	NA	LTCONS_00010573	XM_017001404.1	chr1	156751923	156753613	1691	+	chr1	156728898	156736960	2189	+	*	0.8179	0.7287	0.06	0.17	0.05	0.05	0.42	1	0.1	0.25	0.03	0.2	0.25	0.33	0.3	0.33	0.31	1.12	0.35	0.86	0.11	0.44
cis_mRNA_up10k	631	NA	LTCONS_00010573	MTCONS_00025029	chr1	156751923	156753613	1691	+	chr1	156742107	156751293	2044	-	*	0.6454	0.766	0.06	0.17	0.05	0.05	0.42	1	0.1	0.25	0.03	0.2	0.49	0	0.25	0.31	0.56	1.03	0.54	0.59	0.13	1.02
cis_mRNA_up10k	631	NA	LTCONS_00010573	NM_001319187.1	chr1	156751923	156753613	1691	+	chr1	156742107	156751293	2023	-	*	0.9075	0.6869	0.06	0.17	0.05	0.05	0.42	1	0.1	0.25	0.03	0.2	25.44	31.14	24.73	15.91	56.09	69.28	21.78	37.91	35.05	28.78
cis_mRNA_dw20k	16781	NA	LTCONS_00010574	MTCONS_00010561	chr1	156753740	156754669	930	+	chr1	156728471	156736960	1749	+	*	0.9375	0.6247	0.05	0.17	0.15	0.1	0.29	0.89	0.07	0.33	0.05	0	0	0	0	0	0.22	0.92	0	0	0	0
cis_mRNA_up10k	1990	NA	LTCONS_00010574	NM_004494.2	chr1	156753740	156754669	930	+	chr1	156742107	156751751	2387	-	*	0.6597	0.7195	0.05	0.17	0.15	0.1	0.29	0.89	0.07	0.33	0.05	0	14.82	17.96	19.21	13.41	38.08	30.84	15.15	19.56	18.89	15.15
cis_mRNA_dw20k	17918	NA	LTCONS_00010575	MTCONS_00010561	chr1	156754877	156756815	1939	+	chr1	156728471	156736960	1749	+	*	0.9799	0.7006	0.05	0.14	0.04	0.03	0.43	1.09	0.15	0.21	0.09	0.16	0	0	0	0	0.22	0.92	0	0	0	0
cis_mRNA_dw20k	17918	NA	LTCONS_00010575	XM_005245236.4	chr1	156754877	156756815	1939	+	chr1	156728686	156736960	1613	+	*	0.8744	0.7052	0.05	0.14	0.04	0.03	0.43	1.09	0.15	0.21	0.09	0.16	0.25	0	0.68	0.11	1.34	2.24	1.07	0.93	0	0.6
cis_mRNA_dw20k	17918	NA	LTCONS_00010575	XM_017001404.1	chr1	156754877	156756815	1939	+	chr1	156728898	156736960	2189	+	*	0.7836	0.6383	0.05	0.14	0.04	0.03	0.43	1.09	0.15	0.21	0.09	0.16	0.25	0.33	0.3	0.33	0.31	1.12	0.35	0.86	0.11	0.44
cis_mRNA_up10k	3127	NA	LTCONS_00010575	NM_004494.2	chr1	156754877	156756815	1939	+	chr1	156742107	156751751	2387	-	*	0.7149	0.693	0.05	0.14	0.04	0.03	0.43	1.09	0.15	0.21	0.09	0.16	14.82	17.96	19.21	13.41	38.08	30.84	15.15	19.56	18.89	15.15
cis_mRNA_up10k	3585	NA	LTCONS_00010575	MTCONS_00025029	chr1	156754877	156756815	1939	+	chr1	156742107	156751293	2044	-	*	0.6198	0.7455	0.05	0.14	0.04	0.03	0.43	1.09	0.15	0.21	0.09	0.16	0.49	0	0.25	0.31	0.56	1.03	0.54	0.59	0.13	1.02
cis_mRNA_up10k	3585	NA	LTCONS_00010575	NM_001319187.1	chr1	156754877	156756815	1939	+	chr1	156742107	156751293	2023	-	*	0.9087	0.8061	0.05	0.14	0.04	0.03	0.43	1.09	0.15	0.21	0.09	0.16	25.44	31.14	24.73	15.91	56.09	69.28	21.78	37.91	35.05	28.78
cis_mRNA_overlap	0	Lnc-AntiOverlap-mRNA	LTCONS_00010846	MTCONS_00025307	chr1	160261734	160264731	2373	+	chr1	160215715	160262560	4215	-	*	0.6647	0.7647	0	0.12	0	0	0	0.1	0	0.11	0.08	0	7.05	7.41	5.05	4.96	7.04	10.54	3.57	7.6	7.97	7.01
cis_mRNA_dw20k	6477	NA	LTCONS_00013564	NM_005525.3	chr1	209741426	209745214	3170	+	chr1	209704791	209734950	1460	+	*	0.7982	0.7697	1.09	0.81	1.62	1.78	0.21	0.36	1.58	0.24	0.93	1.46	177.43	228.06	242.4	315.93	25.83	4.88	182.41	111.87	70.87	371.82
cis_mRNA_overlap	0	Lnc-Overlap-mRNA	LTCONS_00013784	XM_005273146.1	chr1	212608628	212620777	3198	+	chr1	212608760	212620775	2282	+	-1351.03	0.73	0.6748	2.89	0.31	1.73	1.31	0.78	1.08	1.51	1.51	0.89	1.91	1.67	0.28	1	1.5	0.52	0.47	0.92	1.06	0.76	0.58
cis_mRNA_overlap	0	Lnc-AntiOverlap-mRNA	LTCONS_00014385	XM_017003089.1	chr1	223992730	224034927	3569	+	chr1	224027677	224035390	641	-	*	0.7327	0.6875	0	0	0	0	0.1	0	0	0.06	0	0	0.35	0.13	0.57	0.17	1.48	0.73	0.43	3.14	0.17	0.57
cis_mRNA_overlap	0	Lnc-Overlap-mRNA	LTCONS_00015477	XM_017000106.1	chr1	243487825	243500092	518	+	chr1	243256050	243500092	2586	+	-320.06	0.701	0.6247	0	0	0	0.17	0	0	1.78	0	0	0	0.3	0.62	0	0.55	0.51	0.19	0.95	0.46	0.51	0.43
cis_mRNA_overlap	0	Lnc-Overlap-mRNA	LTCONS_00015608	NM_001143943.1	chr1	244969668	245093006	6238	+	chr1	244970329	245125228	3772	+	*	-0.665	-0.613	0.02	0	0	0.02	0	0	0	0	0	0	0.33	0.41	0.61	0.25	0.61	0.54	0.54	0.32	0.53	0.39
cis_mRNA_overlap	0	mRNA-CompleteIn-LncExon	LTCONS_00015608	XM_017002543.1	chr1	244969668	245093006	6238	+	chr1	245002121	245093006	2440	+	-1300.33	-0.6468	-0.6984	0.02	0	0	0.02	0	0	0	0	0	0	0.22	0.29	0.45	0.14	0.36	0.38	0.61	0.54	0.23	0.38
cis_mRNA_overlap	0	Lnc-Overlap-mRNA	LTCONS_00015868	MTCONS_00015867	chr1	13449	29370	1869	-	chr1	13449	29370	2893	-	-1480.08	-0.7584	-0.8432	0.31	0.28	0.27	0	0	0	0.61	0	0	0.37	0	0	0.46	0.46	0.55	0.92	0	0.3	0.51	0
cis_mRNA_dw20k	1051	NA	LTCONS_00015894	MTCONS_00015900	chr1	110953	133723	1029	-	chr1	134773	140566	5195	-	*	0.9699	0.777	0	0.14	0	0	0	0.19	0	0	0.05	0	0.05	0.33	0	0	0	0.36	0.02	0	0.03	0.01
tran	350191	NA	LTCONS_00015938	MTCONS_00015898	chr1	490756	501607	4157	-	chr1	131337	140566	5257	-	-2936.04	0.9754	0.6956	0.07	0.33	0.14	0.16	0.2	1.68	0.07	0.48	0.22	0.31	0	0	0	0	0	0.41	0	0.03	0.02	0
cis_mRNA_up10k	6306	NA	LTCONS_00015983	XM_017002411.1	chr1	718147	744657	10756	-	chr1	683910	711842	5248	-	*	0.7799	0.7173	0.16	0.5	0.78	0.51	1.13	6.19	0.92	2.31	0.44	1.54	0.03	0.18	0.2	0.18	0.63	0.77	0.24	0.49	0.13	0.08
cis_mRNA_dw20k	5546	NA	LTCONS_00017247	NM_001013641.2	chr1	15753342	15754351	1010	-	chr1	15742492	15747797	1265	+	*	-0.6056	-0.7677	0.02	0.07	0	0	0.07	0	0	0.4	0	0	3.1	2.8	4.36	7.14	1.67	3.47	3.18	0.49	1.97	3.48
cis_mRNA_up10k	2265	NA	LTCONS_00017247	XM_011541618.2	chr1	15753342	15754351	1010	-	chr1	15756615	15786590	3443	+	*	0.9841	0.7484	0.02	0.07	0	0	0.07	0	0	0.4	0	0	0	0.01	0	0	0	0	0	0.08	0	0
cis_mRNA_up10k	4411	NA	LTCONS_00017247	XM_005245900.1	chr1	15753342	15754351	1010	-	chr1	15758761	15775221	1616	+	*	0.7235	0.8157	0.02	0.07	0	0	0.07	0	0	0.4	0	0	0.29	0.47	0.22	0	1.06	0.34	0.27	0.99	0.2	0.1
cis_mRNA_dw20k	4810	NA	LTCONS_00017301	XM_011542126.2	chr1	16215357	16227316	4244	-	chr1	16232125	16237445	1414	-	*	0.808	0.7284	0.2	0.25	0.08	0.06	0.06	0.69	0.1	0.92	0.22	0.1	0.21	0.25	0.16	0	0.08	0.26	0	0.36	0.07	0
cis_mRNA_dw20k	532	NA	LTCONS_00017315	XM_017001224.1	chr1	16395684	16396740	1057	-	chr1	16397271	16421557	2947	-	*	0.9734	0.8044	0.12	0.47	0.19	0.05	0	0.12	0.08	2.23	0.41	0	0.05	0.06	0.03	0	0	0	0.01	0.21	0.03	0.01
cis_mRNA_overlap	0	Lnc-Overlap-mRNA	LTCONS_00017315	MTCONS_00017316	chr1	16395684	16396740	1057	-	chr1	16395684	16437842	4149	-	-768.91	0.9625	0.7805	0.12	0.47	0.19	0.05	0	0.12	0.08	2.23	0.41	0	0.18	0.88	0.14	0.03	0.11	0.01	0.05	1.98	0.2	0.02
tran	133199	NA	LTCONS_00017423	XM_017003079.1	chr1	16869386	16873421	4036	-	chr1	16733778	16736188	2411	-	-1411.53	0.8974	0.8	0.05	0.01	0.04	0.08	0.28	1.47	0.08	0.17	0.2	0.03	0	0	0.02	0.01	0.03	0.17	0.08	0.04	0.05	0
cis_mRNA_dw20k	3631	NA	LTCONS_00018854	NM_001164825.1	chr1	34710034	34846732	3653	-	chr1	34850362	34859737	5904	-	*	0.6837	0.8123	0.08	0.03	0.06	0	0.49	0.15	0.13	0.22	0	0	0.59	0.47	0.43	0.23	0.89	0.98	0.74	0.76	0.43	0.67
cis_mRNA_dw20k	5938	NA	LTCONS_00018854	XM_011540555.2	chr1	34710034	34846732	3653	-	chr1	34852669	34857806	3466	-	*	0.8819	0.7093	0.08	0.03	0.06	0	0.49	0.15	0.13	0.22	0	0	0	0	0	0	0.3	0	0	0.24	0	0
cis_mRNA_overlap	0	Lnc-AntiOverlap-mRNA	LTCONS_00019580	NM_014663.2	chr1	43666833	43708139	1557	-	chr1	43650126	43705518	4509	+	*	0.6691	0.8128	0	0	0	0	0.01	0.07	0	0.17	0	0	6.47	8.01	6.38	4.32	8.14	8.21	4.83	9.28	6.69	5.82
cis_mRNA_overlap	0	Lnc-AntiOverlap-mRNA	LTCONS_00019585	XM_005271355.3	chr1	43694847	43708139	614	-	chr1	43650468	43705516	4462	+	*	0.7135	0.7473	0	0.09	0	0	0	1.46	0	0.54	0	0	0	0.3	0.16	0	0	0.92	0.2	1.19	0.64	0.17
cis_mRNA_dw20k	10406	NA	LTCONS_00019768	NM_181696.2	chr1	45493877	45500630	2769	-	chr1	45511035	45521938	1209	-	*	0.6857	0.8431	0.07	0.11	0.01	0.08	0.15	1.49	0.08	0.26	0.14	0.06	0	0.5	0.2	0.29	0.84	0.97	0	0.53	0.24	0
cis_mRNA_up10k	1072	NA	LTCONS_00020279	XM_017000816.1	chr1	52554170	52612724	1007	-	chr1	52463238	52553099	3790	-	*	0.8312	0.6266	0	0	0	0	0	2.64	0	0	0.02	0	0.33	0.26	0.33	0.09	0.4	2.04	0.09	1.32	0.44	0.21
cis_mRNA_overlap	0	Lnc-Overlap-mRNA	LTCONS_00020532	MTCONS_00020535	chr1	56718804	56729956	7449	-	chr1	56718804	56826921	12403	-	*	0.8929	0.8875	0.84	0.49	2.06	0.82	0.77	0.94	2.12	0.38	0.47	3.68	0.44	0.14	0.29	0.2	0.26	0.26	0.5	0	0.24	1.53
cis_mRNA_overlap	0	Lnc-Overlap-mRNA	LTCONS_00020532	MTCONS_00020536	chr1	56718804	56729956	7449	-	chr1	56718804	56826921	15333	-	*	0.9499	0.8545	0.84	0.49	2.06	0.82	0.77	0.94	2.12	0.38	0.47	3.68	0.93	0.56	2.81	1.07	1.46	0.86	2.54	0.43	0.67	3.36
cis_mRNA_overlap	0	Lnc-Overlap-mRNA	LTCONS_00020532	MTCONS_00020537	chr1	56718804	56729956	7449	-	chr1	56718804	56826921	13170	-	*	0.9779	0.8303	0.84	0.49	2.06	0.82	0.77	0.94	2.12	0.38	0.47	3.68	1.85	0.87	3.32	1.9	1.48	1.18	3.25	0.6	1.47	5.37
cis_mRNA_overlap	0	Lnc-Overlap-mRNA	LTCONS_00020533	MTCONS_00020536	chr1	56718804	56730395	11146	-	chr1	56718804	56826921	15333	-	*	0.7316	0.7441	0.03	0	0.06	0.09	0	0	0.05	0	0.02	0.12	0.93	0.56	2.81	1.07	1.46	0.86	2.54	0.43	0.67	3.36
cis_mRNA_overlap	0	Lnc-Overlap-mRNA	LTCONS_00020533	MTCONS_00020537	chr1	56718804	56730395	11146	-	chr1	56718804	56826921	13170	-	*	0.8548	0.9004	0.03	0	0.06	0.09	0	0	0.05	0	0.02	0.12	1.85	0.87	3.32	1.9	1.48	1.18	3.25	0.6	1.47	5.37
cis_mRNA_overlap	0	Lnc-Overlap-mRNA	LTCONS_00020533	XM_005270584.3	chr1	56718804	56730395	11146	-	chr1	56718870	56819696	3070	-	*	0.6361	0.6003	0.03	0	0.06	0.09	0	0	0.05	0	0.02	0.12	1.1	0.44	0.43	0.61	0.02	0.41	0.37	0.27	0.63	1.25
cis_mRNA_overlap	0	Lnc-AntiOverlap-mRNA	LTCONS_00022055	NM_206886.4	chr1	93261702	93346434	5372	-	chr1	93180716	93278730	4322	+	*	0.7942	0.6667	0.06	0.52	0.13	0.1	0.06	0.32	0	0	0.35	0	0.23	0.44	0	0.31	0	0.53	0	0.11	0.57	0.14
cis_mRNA_overlap	0	Lnc-AntiOverlap-mRNA	LTCONS_00022076	XM_017001170.1	chr1	93270109	93273137	3029	-	chr1	93218747	93274687	7988	+	-5184.08	0.8136	0.7295	0.1	0.21	0.2	0.08	0.58	0.82	0.13	0.59	0.22	0.45	0.26	0.12	0.38	0.16	0.31	1.17	0.31	0.52	0.27	0.48
cis_mRNA_up10k	71	NA	LTCONS_00022194	XM_005270440.2	chr1	94657533	94820281	1633	-	chr1	94820351	94895053	2098	+	*	0.9496	0.7006	0	0	0	0.03	0.41	0	0	0	0	0	0.42	0.19	0.88	1.02	3.01	0.61	0.64	0.22	0.9	0.46
cis_mRNA_dw20k	10529	NA	LTCONS_00022323	MTCONS_00022325	chr1	99697531	99698171	641	-	chr1	99708699	99765793	3121	-	*	0.9391	0.6921	0	0.04	0.05	0.12	0.17	2.53	0	0.35	0.6	0.14	0.23	0.23	0.45	0.55	0.2	2.53	0.29	1.29	0.81	0.53
cis_mRNA_dw20k	10529	NA	LTCONS_00022323	XM_005270861.3	chr1	99697531	99698171	641	-	chr1	99708699	99766630	2237	-	*	0.676	0.6991	0	0.04	0.05	0.12	0.17	2.53	0	0.35	0.6	0.14	12.34	30.37	11.4	16.24	17.79	34.09	10.24	23.03	28.01	20.67
cis_mRNA_dw20k	10529	NA	LTCONS_00022323	XM_011541451.2	chr1	99697531	99698171	641	-	chr1	99708699	99765793	2710	-	*	0.9402	0.7052	0	0.04	0.05	0.12	0.17	2.53	0	0.35	0.6	0.14	0.03	1.4	1.34	1.89	1.46	6.82	0.32	0.44	1.67	1.53
cis_mRNA_dw20k	10529	NA	LTCONS_00022323	XM_017001271.1	chr1	99697531	99698171	641	-	chr1	99708699	99766619	2121	-	*	0.8046	0.6687	0	0.04	0.05	0.12	0.17	2.53	0	0.35	0.6	0.14	0.64	1.87	0	2.82	2.17	4.87	0.07	0.98	2.63	1.2
cis_mRNA_dw20k	13369	NA	LTCONS_00022323	XM_011541452.1	chr1	99697531	99698171	641	-	chr1	99711539	99766630	2091	-	*	0.8335	0.6201	0	0.04	0.05	0.12	0.17	2.53	0	0.35	0.6	0.14	0.21	0	2.07	0.01	1.41	5.15	0.38	3.24	1.95	0.05
cis_mRNA_overlap	0	Lnc-CompleteIn-mRNAIntron	LTCONS_00022558	XM_017000054.1	chr1	107672880	107678570	5691	-	chr1	107587820	107964916	10281	-	*	0.8189	0.6973	0.43	0.14	0.33	0.29	0.4	0.29	0.64	0.18	0.11	0.64	0.2	0.08	0.08	0	0.31	0.23	0.38	0.14	0.09	0.39
cis_mRNA_overlap	0	Lnc-AntiOverlap-mRNA	LTCONS_00023370	MTCONS_00008847	chr1	119342801	119379295	1137	-	chr1	119361913	119394130	1962	+	*	0.8785	0.7964	1.96	1.18	2.99	1.68	0	6.36	4.23	0.03	0.37	7.11	1.83	0	1.95	2.55	0.19	3.38	1.33	0	0.03	5.98
cis_mRNA_overlap	0	Lnc-AntiOverlap-mRNA	LTCONS_00023370	NM_001005783.2	chr1	119342801	119379295	1137	-	chr1	119368776	119394130	1701	+	*	0.6351	0.7576	1.96	1.18	2.99	1.68	0	6.36	4.23	0.03	0.37	7.11	46.63	19.74	46.35	77.64	2.77	41.87	25.97	0.2	13.31	79.04
cis_mRNA_up10k	1784	NA	LTCONS_00023370	XM_011541560.1	chr1	119342801	119379295	1137	-	chr1	119381078	119394130	1144	+	*	0.8771	0.8788	1.96	1.18	2.99	1.68	0	6.36	4.23	0.03	0.37	7.11	5.16	2.07	3.38	5.86	0	7.48	3.33	0.19	0.45	10.95
cis_mRNA_dw20k	10409	NA	LTCONS_00023741	XM_017000801.1	chr1	147155106	147173555	7415	-	chr1	147183963	147225566	4677	-	*	0.7409	0.768	1.62	2.27	2.38	2.54	5.13	4.69	1.1	3.1	5.32	1.21	0	0	0	0	0.03	0.24	0	0	0.23	0
cis_mRNA_dw20k	12707	NA	LTCONS_00023741	NM_001144830.2	chr1	147155106	147173555	7415	-	chr1	147186261	147225638	2497	-	*	0.7849	0.7455	1.62	2.27	2.38	2.54	5.13	4.69	1.1	3.1	5.32	1.21	11.12	12.23	14.76	17.56	23.05	14.37	9.28	10.85	32.45	11.91
cis_mRNA_overlap	0	Lnc-AntiOverlap-mRNA	LTCONS_00023741	MTCONS_00009242	chr1	147155106	147173555	7415	-	chr1	147172779	147184312	7363	+	*	0.6228	0.766	1.62	2.27	2.38	2.54	5.13	4.69	1.1	3.1	5.32	1.21	0.51	0.68	0.44	0.26	1.73	4.36	0.26	0.74	0.85	0.29
cis_mRNA_overlap	0	Lnc-Overlap-mRNA	LTCONS_00023741	XM_011509729.1	chr1	147155106	147173555	7415	-	chr1	147155106	147172589	5499	-	-2620.48	0.858	0.8424	1.62	2.27	2.38	2.54	5.13	4.69	1.1	3.1	5.32	1.21	1.07	0.76	1.23	0.94	3.43	1.5	0.67	0.85	3.3	0.68
cis_mRNA_overlap	0	mRNA-CompleteIn-LncExon	LTCONS_00023741	NM_005399.4	chr1	147155106	147173555	7415	-	chr1	147155106	147172589	5462	-	-2603.45	0.8983	0.8909	1.62	2.27	2.38	2.54	5.13	4.69	1.1	3.1	5.32	1.21	7.25	12.09	11.34	10.29	15.36	22.63	3.08	15.69	18.94	3.44
cis_mRNA_overlap	0	Lnc-AntiOverlap-mRNA	LTCONS_00024509	NM_001255978.1	chr1	153974269	153977975	1529	-	chr1	153967839	153974364	1817	+	*	0.8147	0.6176	0	0.1	0	0	0	0.17	0	0.08	0.08	0	0.49	1.43	0.69	0.24	0	4.21	0	0.86	0	0.54
cis_mRNA_dw20k	11093	NA	LTCONS_00025000	XM_011509853.2	chr1	156637700	156661475	8266	-	chr1	156618862	156626608	3045	+	*	0.8672	0.9938	0	0	0	0	0	0.09	0	0.28	0	0	0	0	0	0	0	0.01	0	0.01	0	0
cis_mRNA_overlap	0	Lnc-AntiCompleteIn-mRNAIntron	LTCONS_00025932	XM_017000985.1	chr1	172136879	172144795	7701	-	chr1	171841495	172394427	3651	+	*	0.6433	0.6436	0	0	0	0	0	0.02	0	0	0.03	0	0.03	0.08	0	0.02	0.06	0.15	0.03	0	0.08	0.06
cis_mRNA_dw20k	6468	NA	LTCONS_00026012	XM_017001123.1	chr1	173595810	173603094	2544	-	chr1	173609561	173705430	1755	-	*	0.9262	0.6103	0.12	0.86	0	0.05	0	0	0.01	0	0	0.01	0.06	0.32	0	0	0	0	0.12	0	0.04	0
cis_mRNA_overlap	0	Lnc-CompleteIn-mRNAIntron	LTCONS_00026363	MTCONS_00026356	chr1	180356633	180361855	5223	-	chr1	180264253	180502887	24175	-	*	0.8245	0.9052	0.15	0.07	0.46	0.09	0.87	1.2	0.46	1.07	0.09	0.37	0.17	0.15	0.23	0.1	0.82	1.53	0.29	0.44	0.23	0.27
cis_mRNA_overlap	0	Lnc-CompleteIn-mRNAIntron	LTCONS_00026363	NM_032360.3	chr1	180356633	180361855	5223	-	chr1	180288217	180502887	1616	-	*	0.861	0.6159	0.15	0.07	0.46	0.09	0.87	1.2	0.46	1.07	0.09	0.37	5.55	5.46	4.45	4.28	7.87	21.1	4.05	14.82	3.28	4.49
cis_mRNA_dw20k	18738	NA	LTCONS_00026805	MTCONS_00012465	chr1	193110514	193115735	357	-	chr1	193059422	193091777	2430	+	*	0.7042	0.9938	0	0	0	0	0.13	0	0	2.52	0	0	0	0	0	0	0.05	0	0	0.05	0	0
cis_mRNA_up10k	5037	NA	LTCONS_00026805	NM_197962.2	chr1	193110514	193115735	357	-	chr1	193096465	193105478	751	-	*	0.9069	0.7006	0	0	0	0	0.13	0	0	2.52	0	0	4.31	6.44	4.45	5.47	7.7	3.73	3.56	13.1	4.76	3.67
cis_mRNA_up10k	6224	NA	LTCONS_00026805	NM_024529.4	chr1	193110514	193115735	357	-	chr1	193121958	193254815	5942	+	*	0.7108	0.7006	0	0	0	0	0.13	0	0	2.52	0	0	3.68	2.95	3.5	2.64	6.21	3.02	3.79	6.51	3.27	3.83
cis_mRNA_up10k	6300	NA	LTCONS_00026805	XM_006711537.3	chr1	193110514	193115735	357	-	chr1	193122034	193161356	1373	+	*	0.8006	0.7028	0	0	0	0	0.13	0	0	2.52	0	0	0.29	0.53	0.77	0.41	1.27	0.87	0.65	2.07	0	0
cis_mRNA_overlap	0	Lnc-Overlap-mRNA	LTCONS_00026922	MTCONS_00026914	chr1	197559694	197775842	3122	-	chr1	197504748	197782138	8107	-	*	0.8132	0.6854	0.12	0	0	0	0	0	0	0	0	0.2	1.53	0.46	0.58	0.89	0.58	0.06	0.39	0.74	0.45	1.36
cis_mRNA_up10k	2494	NA	LTCONS_00027402	XM_005244951.4	chr1	205636570	205643809	7240	-	chr1	205613377	205634077	5419	-	*	0.7517	0.8488	0.06	0.1	0.22	0.06	0.09	0.09	0.66	0.08	0.06	0.64	0.04	0.05	0.21	0.02	0.18	0.05	0.41	0.06	0	0.14
cis_mRNA_dw20k	19072	NA	LTCONS_00027869	NM_001024601.2	chr1	212810540	212811070	531	-	chr1	212830141	212847649	506	-	*	0.8521	0.8442	0	0.22	0	0	0.22	1.29	0	0.07	0.44	0	0	0	0	0	0.39	0.54	0	0.08	0.18	0
cis_mRNA_overlap	0	Lnc-CompleteIn-mRNAIntron	LTCONS_00028113	XM_011509265.2	chr1	216855373	216855707	335	-	chr1	216503246	217080615	9327	-	*	0.873	0.6577	0	0	0.65	0.11	0	0	1.46	0	0	0.46	0	0.01	0	0.02	0	0	0.12	0	0	0.06
cis_mRNA_overlap	0	Lnc-AntiCompleteIn-mRNAExon	LTCONS_00028273	NM_001317338.1	chr1	220784084	220784500	417	-	chr1	220748246	220784815	2229	+	-746.5	0.6387	0.7455	0.4	0.08	1.76	1.14	0.92	0.1	1.24	0.52	0.24	0.59	4.58	2.13	5.66	3.63	2.78	2.44	7.48	1.53	2.53	5.51
cis_mRNA_overlap	0	Lnc-AntiCompleteIn-mRNAExon	LTCONS_00028273	NM_017898.4	chr1	220784084	220784500	417	-	chr1	220748246	220784815	2222	+	-746.5	0.9033	0.8788	0.4	0.08	1.76	1.14	0.92	0.1	1.24	0.52	0.24	0.59	9.47	6.61	18.02	16.07	10.21	5.08	18.11	5.7	9.08	10.75
tran	NA	NA	LTCONS_00028454	NM_207366.2	chr1	223943094	223944337	1244	-	chr7	55793544	55862789	3785	-	-502.94	0.8912	0.6247	0.39	0.44	1.34	0.39	2.33	1.73	1.03	8.24	0.26	1.69	0	0	0	0	0	0.02	0	0.04	0	0
cis_mRNA_overlap	0	Lnc-CompleteIn-mRNAIntron	LTCONS_00028574	NM_018212.4	chr1	225619907	225620251	345	-	chr1	225486832	225653143	13109	-	*	0.9478	0.6364	0.32	0.22	0.25	0	6.04	1.75	1.02	2.66	0.11	1.3	0.75	0.6	0.29	0.49	3.62	1.2	0.3	1.9	0.98	0.71
cis_mRNA_overlap	0	Lnc-CompleteIn-mRNAIntron	LTCONS_00028574	XM_017001749.1	chr1	225619907	225620251	345	-	chr1	225492836	225653878	7621	-	*	0.9386	0.635	0.32	0.22	0.25	0	6.04	1.75	1.02	2.66	0.11	1.3	0	0.04	0	0	0.39	0	0	0.22	0	0.05
cis_mRNA_overlap	0	Lnc-CompleteIn-mRNAIntron	LTCONS_00028574	XM_017001752.1	chr1	225619907	225620251	345	-	chr1	225492836	225653878	7453	-	*	0.7763	0.8545	0.32	0.22	0.25	0	6.04	1.75	1.02	2.66	0.11	1.3	0.37	0.31	0.59	0.26	3	0.64	0.73	3.97	0.49	0.5
cis_mRNA_overlap	0	Lnc-CompleteIn-mRNAIntron	LTCONS_00028575	XM_017001752.1	chr1	225621592	225633661	12070	-	chr1	225492836	225653878	7453	-	*	0.9138	0.9394	0.12	0.1	0.37	0.05	3.35	0.56	0.73	2.32	0.08	0.54	0.37	0.31	0.59	0.26	3	0.64	0.73	3.97	0.49	0.5
tran	NA	NA	LTCONS_00028699	MTCONS_00284733	chr1	227965631	227971706	6076	-	chr7	55744055	55758569	4995	-	-9935.53	0.9608	0.7006	0.01	0.09	0.07	0.05	0.15	0.98	0.03	0.62	0.02	0.14	0	0	0	0	0	0.03	0	0.01	0	0
cis_mRNA_overlap	0	Lnc-CompleteIn-mRNAIntron	LTCONS_00029723	XM_017002094.1	chr1	246243409	246243974	566	-	chr1	245749342	246286890	5277	-	*	0.9546	0.9636	0.41	0	0.55	0.15	2.08	1.72	0.81	2.12	0.35	1.21	0.41	0.21	1.28	0.36	3	1.69	1.22	2.74	0.28	1.43
cis_mRNA_dw20k	7586	NA	LTCONS_00029970	NM_001785.2	chr1	20626493	20628817	2325	.	chr1	20588951	20618908	960	+	*	0.8335	0.6982	0.01	0	0.01	0.01	0.01	0	0.08	0	0	0.04	3.51	2.23	5.3	2.34	2.19	3.79	7.82	0.32	1.66	5.27
cis_mRNA_dw20k	2118	NA	LTCONS_00030100	NM_000562.2	chr1	56920338	56922787	2450	.	chr1	56854770	56918221	2392	+	*	0.8641	0.8667	0.97	0.22	0.8	1.03	0.1	0.06	2.21	0.02	0.35	1.09	243.22	40.39	206.34	277.23	36.16	45.57	265.21	4.66	102.39	190.72
cis_mRNA_dw20k	6424	NA	LTCONS_00030100	MTCONS_00020557	chr1	56920338	56922787	2450	.	chr1	56929210	56966140	2055	-	*	0.8803	0.9515	0.97	0.22	0.8	1.03	0.1	0.06	2.21	0.02	0.35	1.09	85.41	47.26	76.47	132.52	50.92	26.88	136.69	14.07	71.55	80.13
cis_mRNA_dw20k	6424	NA	LTCONS_00030100	NM_000066.3	chr1	56920338	56922787	2450	.	chr1	56929210	56966140	2162	-	*	0.8387	0.9394	0.97	0.22	0.8	1.03	0.1	0.06	2.21	0.02	0.35	1.09	127.29	70.05	105.1	185.04	26.77	12.68	160.63	9.04	57.04	172.64
cis_mRNA_dw20k	6424	NA	LTCONS_00030100	NM_001278543.1	chr1	56920338	56922787	2450	.	chr1	56929210	56966140	2384	-	*	0.8729	0.9636	0.97	0.22	0.8	1.03	0.1	0.06	2.21	0.02	0.35	1.09	5.93	2.03	10.65	10.01	1.42	0.66	11.8	0.24	2.49	10.85
cis_mRNA_dw20k	6424	NA	LTCONS_00030100	NM_001278544.1	chr1	56920338	56922787	2450	.	chr1	56929210	56966140	2291	-	*	0.8255	0.9394	0.97	0.22	0.8	1.03	0.1	0.06	2.21	0.02	0.35	1.09	18.88	9.44	21.93	27.18	4.6	4.86	26.61	1.06	10.97	33.38
cis_mRNA_up10k	3360	NA	LTCONS_00030999	NM_001353.5	chr10	4937424	4959903	22480	+	chr10	4963262	4977966	1379	+	*	0.9151	0.8303	0.08	1.95	0.26	0.07	1.24	1.32	0.18	4.18	2.13	0.22	134.45	682.01	144.17	146.33	245.27	506.69	95.61	841.43	782.49	80.65
cis_mRNA_up10k	3490	NA	LTCONS_00030999	XM_017015791.1	chr10	4937424	4959903	22480	+	chr10	4963392	4979967	3172	+	*	0.7303	0.8303	0.08	1.95	0.26	0.07	1.24	1.32	0.18	4.18	2.13	0.22	11.16	66.23	11.4	7.2	17.76	12.48	12.59	46.04	30.16	16.3
cis_mRNA_up10k	3360	NA	LTCONS_00031000	NM_001353.5	chr10	4955309	4959903	1757	+	chr10	4963262	4977966	1379	+	*	0.9067	0.8398	0	0.14	0	0	0.05	0	0	0.24	0.18	0	134.45	682.01	144.17	146.33	245.27	506.69	95.61	841.43	782.49	80.65
cis_mRNA_up10k	3490	NA	LTCONS_00031000	XM_017015791.1	chr10	4955309	4959903	1757	+	chr10	4963392	4979967	3172	+	*	0.801	0.8467	0	0.14	0	0	0.05	0	0	0.24	0.18	0	11.16	66.23	11.4	7.2	17.76	12.48	12.59	46.04	30.16	16.3
cis_mRNA_up10k	662	NA	LTCONS_00031001	NM_001353.5	chr10	4962169	4962601	433	+	chr10	4963262	4977966	1379	+	*	0.8672	0.8024	0.15	3.03	0.09	0	3.69	2	0	11.28	7.12	0.14	134.45	682.01	144.17	146.33	245.27	506.69	95.61	841.43	782.49	80.65
cis_mRNA_up10k	792	NA	LTCONS_00031001	XM_017015791.1	chr10	4962169	4962601	433	+	chr10	4963392	4979967	3172	+	*	0.6067	0.7477	0.15	3.03	0.09	0	3.69	2	0	11.28	7.12	0.14	11.16	66.23	11.4	7.2	17.76	12.48	12.59	46.04	30.16	16.3
cis_mRNA_dw20k	2554	NA	LTCONS_00031237	NM_002216.2	chr10	7752073	7754547	2475	+	chr10	7703273	7749520	3189	+	*	0.7108	0.6121	1.02	0.6	0.99	0.92	0.66	0.38	0.75	0.11	0.34	1.36	598.3	342.53	641.03	714.9	600.37	175.01	436.69	155.56	685.68	734.84
cis_mRNA_overlap	0	Lnc-CompleteIn-mRNAIntron	LTCONS_00031391	XM_017015555.1	chr10	11302292	11308741	6450	+	chr10	11165486	11321176	1354	+	*	0.8392	0.8815	0.27	0.06	0.31	0.44	0.23	0.09	0.5	0.07	0.06	0.1	2.07	0.7	1.78	1.44	1.74	1.05	2.36	0.54	0.2	0.91
cis_mRNA_overlap	0	Lnc-CompleteIn-mRNAIntron	LTCONS_00031391	XM_017015566.1	chr10	11302292	11308741	6450	+	chr10	11165466	11336516	8895	+	*	0.7283	0.6523	0.27	0.06	0.31	0.44	0.23	0.09	0.5	0.07	0.06	0.1	0.02	0	0.56	0.29	0.36	0	0.41	0.1	0.05	0
cis_mRNA_overlap	0	Lnc-CompleteIn-mRNAIntron	LTCONS_00031392	XM_017015555.1	chr10	11309873	11314052	4180	+	chr10	11165486	11321176	1354	+	*	0.8629	0.8424	0.32	0.03	0.26	0.36	0.24	0.14	0.53	0.09	0.12	0.11	2.07	0.7	1.78	1.44	1.74	1.05	2.36	0.54	0.2	0.91
cis_mRNA_overlap	0	Lnc-CompleteIn-mRNAIntron	LTCONS_00031392	XM_017015560.1	chr10	11309873	11314052	4180	+	chr10	11018056	11336516	8980	+	*	0.7774	0.6228	0.32	0.03	0.26	0.36	0.24	0.14	0.53	0.09	0.12	0.11	0.02	0	0	0	0	0	0.04	0	0	0
cis_mRNA_overlap	0	Lnc-CompleteIn-mRNAIntron	LTCONS_00031392	XM_017015566.1	chr10	11309873	11314052	4180	+	chr10	11165466	11336516	8895	+	*	0.6364	0.6197	0.32	0.03	0.26	0.36	0.24	0.14	0.53	0.09	0.12	0.11	0.02	0	0.56	0.29	0.36	0	0.41	0.1	0.05	0
cis_mRNA_overlap	0	Lnc-Overlap-mRNA	LTCONS_00032051	NM_019043.3	chr10	26390218	26484394	11244	+	chr10	26438337	26567803	2637	+	*	0.7662	0.8182	0.12	0.02	0.94	0.17	0.42	0.58	0.97	0.23	0.03	1.59	1.63	0.12	1.98	1.72	2.68	1.44	4.16	0.93	0.09	3.26
cis_mRNA_overlap	0	Lnc-AntiOverlap-mRNA	LTCONS_00033265	MTCONS_00040799	chr10	46629291	46636771	3162	+	chr10	46607105	46635529	9098	-	*	0.7584	0.6485	0.98	0.09	1.24	1.4	0.24	0.15	1.55	0.2	0.21	2.25	1.31	0.6	1.71	1.14	1.1	1.26	2.04	1.87	0.65	2.93
tran	NA	NA	LTCONS_00033265	NM_005614.3	chr10	46629291	46636771	3162	+	chr7	151466012	151519924	2075	-	-2592.91	-0.6854	-0.7091	0.98	0.09	1.24	1.4	0.24	0.15	1.55	0.2	0.21	2.25	7.56	9.5	6.2	8.4	24.46	19.88	7.13	19.34	10.78	6.44
cis_mRNA_overlap	0	Lnc-Overlap-mRNA	LTCONS_00033695	MTCONS_00033688	chr10	58607623	58654149	46497	+	chr10	58513144	58831437	5550	+	*	0.7486	0.9515	0.37	0	0.63	0.08	2	0.32	1.02	3.55	0.01	0.22	1.61	0.07	1.1	0.23	7.5	0.55	1.29	3.87	0.17	0.35
cis_mRNA_overlap	0	Lnc-Overlap-mRNA	LTCONS_00033695	NM_001080512.2	chr10	58607623	58654149	46497	+	chr10	58513144	58831437	5471	+	*	0.9554	0.766	0.37	0	0.63	0.08	2	0.32	1.02	3.55	0.01	0.22	1.18	0	0.76	0.55	5.78	0.97	0.28	15.02	0	0.46
cis_mRNA_overlap	0	Lnc-Overlap-mRNA	LTCONS_00033695	XM_005270169.4	chr10	58607623	58654149	46497	+	chr10	58645435	58831435	8467	+	*	0.813	0.6918	0.37	0	0.63	0.08	2	0.32	1.02	3.55	0.01	0.22	0.04	0	0.1	0	0	0.01	0.06	0.27	0	0
cis_mRNA_overlap	0	Lnc-Overlap-mRNA	LTCONS_00033695	XM_011540185.2	chr10	58607623	58654149	46497	+	chr10	58512970	58831435	5715	+	*	0.6404	0.7511	0.37	0	0.63	0.08	2	0.32	1.02	3.55	0.01	0.22	0.23	0	0.06	0	0.54	0	0	0.24	0	0
cis_mRNA_overlap	0	Lnc-Overlap-mRNA	LTCONS_00033695	XM_011540188.2	chr10	58607623	58654149	46497	+	chr10	58589772	58831435	5600	+	*	0.9395	0.8876	0.37	0	0.63	0.08	2	0.32	1.02	3.55	0.01	0.22	0	0	0.32	0	0.9	0	0.38	0.94	0	0
cis_mRNA_overlap	0	Lnc-Overlap-mRNA	LTCONS_00033695	XM_017016678.1	chr10	58607623	58654149	46497	+	chr10	58588215	58831435	5620	+	*	0.6685	0.7176	0.37	0	0.63	0.08	2	0.32	1.02	3.55	0.01	0.22	0.53	0	0	0	0.59	0.28	0.18	0.49	0	0
cis_mRNA_overlap	0	Lnc-CompleteIn-mRNAIntron	LTCONS_00033698	MTCONS_00033688	chr10	58669509	58736380	4539	+	chr10	58513144	58831437	5550	+	*	0.834	0.9483	0.37	0	0.42	0.07	2.07	0.25	0.84	2.86	0	0.08	1.61	0.07	1.1	0.23	7.5	0.55	1.29	3.87	0.17	0.35
cis_mRNA_overlap	0	Lnc-CompleteIn-mRNAIntron	LTCONS_00033698	NM_001080512.2	chr10	58669509	58736380	4539	+	chr10	58513144	58831437	5471	+	*	0.9302	0.7683	0.37	0	0.42	0.07	2.07	0.25	0.84	2.86	0	0.08	1.18	0	0.76	0.55	5.78	0.97	0.28	15.02	0	0.46
cis_mRNA_overlap	0	Lnc-CompleteIn-mRNAIntron	LTCONS_00033698	XM_005270169.4	chr10	58669509	58736380	4539	+	chr10	58645435	58831435	8467	+	*	0.727	0.6939	0.37	0	0.42	0.07	2.07	0.25	0.84	2.86	0	0.08	0.04	0	0.1	0	0	0.01	0.06	0.27	0	0
cis_mRNA_overlap	0	Lnc-CompleteIn-mRNAIntron	LTCONS_00033698	XM_011540185.2	chr10	58669509	58736380	4539	+	chr10	58512970	58831435	5715	+	*	0.7344	0.7534	0.37	0	0.42	0.07	2.07	0.25	0.84	2.86	0	0.08	0.23	0	0.06	0	0.54	0	0	0.24	0	0
cis_mRNA_overlap	0	Lnc-CompleteIn-mRNAIntron	LTCONS_00033698	XM_011540188.2	chr10	58669509	58736380	4539	+	chr10	58589772	58831435	5600	+	*	0.9636	0.8903	0.37	0	0.42	0.07	2.07	0.25	0.84	2.86	0	0.08	0	0	0.32	0	0.9	0	0.38	0.94	0	0
cis_mRNA_overlap	0	Lnc-CompleteIn-mRNAIntron	LTCONS_00033698	XM_017016677.1	chr10	58669509	58736380	4539	+	chr10	58607623	58831435	12103	+	*	0.6733	0.6507	0.37	0	0.42	0.07	2.07	0.25	0.84	2.86	0	0.08	0.02	0.01	0	0	0.06	0	0.03	0.02	0	0
cis_mRNA_overlap	0	Lnc-CompleteIn-mRNAIntron	LTCONS_00033698	XM_017016678.1	chr10	58669509	58736380	4539	+	chr10	58588215	58831435	5620	+	*	0.7296	0.7198	0.37	0	0.42	0.07	2.07	0.25	0.84	2.86	0	0.08	0.53	0	0	0	0.59	0.28	0.18	0.49	0	0
cis_mRNA_overlap	0	Lnc-AntiOverlap-mRNA	LTCONS_00034394	NM_021132.3	chr10	73495721	73507309	3439	+	chr10	73436428	73496024	3524	-	*	-0.6147	-0.6961	0.3	0.19	0	0.12	0.17	0.29	0	0	0.35	0	0	0.19	0.41	0.19	0.19	0	0	0.84	0	0.24
cis_mRNA_overlap	0	Lnc-AntiOverlap-mRNA	LTCONS_00034394	XM_017015760.1	chr10	73495721	73507309	3439	+	chr10	73497538	73626393	7638	-	*	-0.6522	-0.6924	0.3	0.19	0	0.12	0.17	0.29	0	0	0.35	0	0	0	0.04	0	0	0	0.02	0.05	0	0
cis_mRNA_dw20k	7116	NA	LTCONS_00034504	MTCONS_00034489	chr10	74716418	74722681	6264	+	chr10	74176489	74709303	1720	+	*	0.7553	0.8632	0.47	0.31	0.58	0.43	0.1	0.11	0.92	0.32	0.14	1.06	12.62	7.04	11.3	16.98	3.14	5.84	12.8	11.24	5.84	15.81
cis_mRNA_dw20k	7116	NA	LTCONS_00034504	NM_001123.3	chr10	74716418	74722681	6264	+	chr10	74176489	74709303	2280	+	*	0.841	0.8504	0.47	0.31	0.58	0.43	0.1	0.11	0.92	0.32	0.14	1.06	0.09	1.33	1.77	0.81	0	0	1.54	0	0	2.4
cis_mRNA_dw20k	7119	NA	LTCONS_00034504	XM_017015701.1	chr10	74716418	74722681	6264	+	chr10	74176554	74709300	2041	+	*	0.6825	0.697	0.47	0.31	0.58	0.43	0.1	0.11	0.92	0.32	0.14	1.06	1.11	0.77	1.04	0.8	0.1	0.19	0.7	0.74	0	1.01
cis_mRNA_dw20k	7129	NA	LTCONS_00034504	XM_017015703.1	chr10	74716418	74722681	6264	+	chr10	74380968	74709290	1685	+	*	0.8715	0.7477	0.47	0.31	0.58	0.43	0.1	0.11	0.92	0.32	0.14	1.06	0.26	0	2.03	5.19	0.51	0	6.79	1.72	1.16	9.71
cis_mRNA_up10k	1818	NA	LTCONS_00034951	XM_005269742.1	chr10	80207392	80229592	7249	+	chr10	80156963	80205575	2377	-	*	0.7174	0.6784	0	0.07	0.07	0	0.08	0	0	0.07	0.01	0	0	0	1.25	0	1.52	0	0.69	2.11	0.15	0
cis_mRNA_up10k	1856	NA	LTCONS_00034951	XM_006717813.1	chr10	80207392	80229592	7249	+	chr10	80156963	80205537	2388	-	*	-0.8009	-0.8455	0	0.07	0.07	0	0.08	0	0	0.07	0.01	0	1.36	0.2	0	0.93	0	0.82	0.78	0	0	0.91
cis_mRNA_overlap	0	Lnc-Overlap-mRNA	LTCONS_00035378	XM_017016454.1	chr10	88879368	88923502	30342	+	chr10	88882015	88923489	2390	+	*	0.8071	0.6201	0.34	0.1	0.33	0.21	1.77	0.46	0.79	2.2	0.22	0.42	0.05	0.03	0.15	0.08	0.33	0.31	0.06	0.41	0	0
cis_mRNA_dw20k	645	NA	LTCONS_00035946	NM_138413.3	chr10	97613446	97616191	2746	+	chr10	97584345	97612802	2486	+	*	0.9039	0.9879	1	1.1	1.02	2.14	0.08	0.51	0.93	0.44	0.48	2.25	10.7	12.37	11.94	15.83	0.73	7.77	7.81	2.07	3.65	15.07
cis_mRNA_overlap	0	Lnc-Overlap-mRNA	LTCONS_00037007	MTCONS_00037004	chr10	115106862	115426716	10556	+	chr10	115094264	115426716	5640	+	*	0.722	0.6199	0	0	0.08	0.11	0	0.05	0	0	0	0.14	0.13	0	0.3	0.09	0	0.1	0.15	0	0	0.32
cis_mRNA_overlap	0	Lnc-Overlap-mRNA	LTCONS_00037007	XM_017016035.1	chr10	115106862	115426716	10556	+	chr10	115093370	115855530	5398	+	*	0.8948	0.8934	0	0	0.08	0.11	0	0.05	0	0	0	0.14	0.03	0	0.19	0.1	0	0.1	0.03	0	0	0.38
cis_mRNA_overlap	0	Lnc-Overlap-mRNA	LTCONS_00037007	XM_017016037.1	chr10	115106862	115426716	10556	+	chr10	115120251	115948985	7731	+	*	0.6889	0.7894	0	0	0.08	0.11	0	0.05	0	0	0	0.14	0	0	0	0.01	0	0	0	0	0	0.22
cis_mRNA_overlap	0	Lnc-Overlap-mRNA	LTCONS_00037007	XM_017016039.1	chr10	115106862	115426716	10556	+	chr10	115220422	115948985	6896	+	*	0.7811	0.6133	0	0	0.08	0.11	0	0.05	0	0	0	0.14	0	0	0	0.14	0.08	0	0	0	0	0.26
cis_mRNA_overlap	0	Lnc-Overlap-mRNA	LTCONS_00037008	MTCONS_00036993	chr10	115106862	115734370	14875	+	chr10	115093365	115426716	3336	+	*	0.9095	0.9401	0.08	0	0.17	0.03	0.01	0	0.08	0	0	0.11	0.16	0	0.61	0.21	0	0	0.54	0	0	0.61
cis_mRNA_overlap	0	Lnc-Overlap-mRNA	LTCONS_00037008	MTCONS_00037004	chr10	115106862	115734370	14875	+	chr10	115094264	115426716	5640	+	*	0.9141	0.8576	0.08	0	0.17	0.03	0.01	0	0.08	0	0	0.11	0.13	0	0.3	0.09	0	0.1	0.15	0	0	0.32
cis_mRNA_overlap	0	Lnc-Overlap-mRNA	LTCONS_00037008	XM_011539588.2	chr10	115106862	115734370	14875	+	chr10	115093413	115948985	8277	+	*	0.8964	0.9368	0.08	0	0.17	0.03	0.01	0	0.08	0	0	0.11	0.34	0	0.65	0.11	0	0	0.11	0	0	0.15
cis_mRNA_overlap	0	Lnc-Overlap-mRNA	LTCONS_00037008	XM_017016035.1	chr10	115106862	115734370	14875	+	chr10	115093370	115855530	5398	+	*	0.6462	0.7166	0.08	0	0.17	0.03	0.01	0	0.08	0	0	0.11	0.03	0	0.19	0.1	0	0.1	0.03	0	0	0.38
cis_mRNA_up10k	795	NA	LTCONS_00039369	XM_011519708.2	chr10	17131286	17134048	2763	-	chr10	16896252	17130492	9485	-	*	0.8271	0.8863	0.1	0.01	0.07	0.04	0.07	0.07	0.12	0.04	0	0.18	0.07	0	0.04	0	0	0.06	0.14	0	0	0.1
tran	NA	NA	LTCONS_00040848	NM_005614.3	chr10	47704882	47712375	3139	-	chr7	151466012	151519924	2075	-	-2608.6	-0.7238	-0.811	0.63	0.09	0.86	0.65	0.18	0.05	0.59	0.05	0.09	0.93	7.56	9.5	6.2	8.4	24.46	19.88	7.13	19.34	10.78	6.44
cis_mRNA_overlap	0	Lnc-CompleteIn-mRNAIntron	LTCONS_00041336	MTCONS_00041284	chr10	60047041	60051554	4514	-	chr10	60026298	60301154	15714	-	*	0.8821	0.9119	1.02	0.01	1.14	0.24	0.45	0.13	1.07	0.02	0.02	0.93	0.61	0.04	0.93	0.36	0.39	0.06	0.55	0.07	0.01	0.31
cis_mRNA_overlap	0	Lnc-CompleteIn-mRNAIntron	LTCONS_00041336	NM_001149.3	chr10	60047041	60051554	4514	-	chr10	60026298	60141016	7203	-	*	0.6295	0.646	1.02	0.01	1.14	0.24	0.45	0.13	1.07	0.02	0.02	0.93	1.4	0	0.31	0.39	0	0.33	0.64	0	0	0.29
cis_mRNA_overlap	0	Lnc-CompleteIn-mRNAIntron	LTCONS_00041336	NM_001204403.1	chr10	60047041	60051554	4514	-	chr10	60026298	60733526	9341	-	*	0.6656	0.8062	1.02	0.01	1.14	0.24	0.45	0.13	1.07	0.02	0.02	0.93	0.37	0.01	0.07	0.05	0.1	0	0.16	0	0	0.06
cis_mRNA_overlap	0	Lnc-CompleteIn-mRNAIntron	LTCONS_00041336	NM_001320874.1	chr10	60047041	60051554	4514	-	chr10	60026298	60389984	9598	-	*	0.8933	0.8901	1.02	0.01	1.14	0.24	0.45	0.13	1.07	0.02	0.02	0.93	0.11	0	0.2	0.11	0.07	0	0.14	0	0	0.2
cis_mRNA_overlap	0	Lnc-CompleteIn-mRNAIntron	LTCONS_00041336	XM_017016113.1	chr10	60047041	60051554	4514	-	chr10	60028401	60389817	15212	-	*	0.7643	0.7704	1.02	0.01	1.14	0.24	0.45	0.13	1.07	0.02	0.02	0.93	0.24	0	0.16	0	0	0	0.12	0	0	0
cis_mRNA_overlap	0	Lnc-CompleteIn-mRNAIntron	LTCONS_00041336	XM_017016115.1	chr10	60047041	60051554	4514	-	chr10	60028401	60300540	15068	-	*	0.9661	0.9878	1.02	0.01	1.14	0.24	0.45	0.13	1.07	0.02	0.02	0.93	0.23	0	0.4	0.11	0.19	0.04	0.37	0.02	0.02	0.3
cis_mRNA_overlap	0	Lnc-CompleteIn-mRNAIntron	LTCONS_00041336	XM_017016133.1	chr10	60047041	60051554	4514	-	chr10	60028401	60572956	7427	-	*	0.7266	0.6462	1.02	0.01	1.14	0.24	0.45	0.13	1.07	0.02	0.02	0.93	0.26	0.07	0.17	0	0.39	0.01	0.37	0	0	0.23
cis_mRNA_overlap	0	Lnc-CompleteIn-mRNAIntron	LTCONS_00041338	NM_001204403.1	chr10	60443071	60462707	19637	-	chr10	60026298	60733526	9341	-	*	0.6927	0.8951	0.47	0.01	0.37	0.14	0.61	0.02	0.39	0.02	0.01	0.27	0.37	0.01	0.07	0.05	0.1	0	0.16	0	0	0.06
cis_mRNA_overlap	0	Lnc-CompleteIn-mRNAIntron	LTCONS_00041338	XM_017016133.1	chr10	60443071	60462707	19637	-	chr10	60028401	60572956	7427	-	*	0.9135	0.8272	0.47	0.01	0.37	0.14	0.61	0.02	0.39	0.02	0.01	0.27	0.26	0.07	0.17	0	0.39	0.01	0.37	0	0	0.23
cis_mRNA_overlap	0	Lnc-CompleteIn-mRNAIntron	LTCONS_00041339	NM_001204403.1	chr10	60462907	60468154	5248	-	chr10	60026298	60733526	9341	-	*	0.6641	0.9265	0.48	0.05	0.44	0.14	0.66	0.01	0.41	0.04	0	0.18	0.37	0.01	0.07	0.05	0.1	0	0.16	0	0	0.06
cis_mRNA_overlap	0	Lnc-CompleteIn-mRNAIntron	LTCONS_00041339	XM_017016133.1	chr10	60462907	60468154	5248	-	chr10	60028401	60572956	7427	-	*	0.8815	0.8406	0.48	0.05	0.44	0.14	0.66	0.01	0.41	0.04	0	0.18	0.26	0.07	0.17	0	0.39	0.01	0.37	0	0	0.23
cis_mRNA_up10k	7530	NA	LTCONS_00041466	NM_001322252.1	chr10	63473530	63511365	29032	-	chr10	63167221	63466001	8672	-	*	0.6224	0.6396	0	0	0	0.01	0	0.14	0.04	0.03	0.02	0.02	0	0	0.2	0	0	0.5	0.51	0.62	0	0
cis_mRNA_overlap	0	Lnc-CompleteIn-mRNAIntron	LTCONS_00041534	XM_017016152.1	chr10	66930454	66930893	440	-	chr10	65912523	67696217	10984	-	*	0.9744	0.7894	0	0	0.17	0.77	0	0.09	0	0	0	0.53	0	0	0	0.05	0	0	0	0	0	0.04
cis_mRNA_overlap	0	Lnc-CompleteIn-mRNAIntron	LTCONS_00041534	XM_017016154.1	chr10	66930454	66930893	440	-	chr10	65912523	67231153	10063	-	*	0.8011	0.8037	0	0	0.17	0.77	0	0.09	0	0	0	0.53	0	0.02	0.1	0.42	0.05	0.33	0.24	0	0.02	0.53
cis_mRNA_overlap	0	Lnc-CompleteIn-mRNAIntron	LTCONS_00041535	XM_017016154.1	chr10	66933724	66939890	6167	-	chr10	65912523	67231153	10063	-	*	0.8253	0.7859	0.21	0.01	0.39	0.44	0.21	0.63	0.17	0.02	0.08	1.64	0	0.02	0.1	0.42	0.05	0.33	0.24	0	0.02	0.53
cis_mRNA_overlap	0	Lnc-CompleteIn-mRNAIntron	LTCONS_00041536	XM_017016151.1	chr10	66951159	66962546	11388	-	chr10	65912523	67665658	10687	-	*	0.7593	0.6111	0.22	0.06	0.62	0.55	0.16	0.67	0.22	0.01	0.09	1.69	0	0	0.06	0	0	0	0	0	0	0.06
cis_mRNA_overlap	0	Lnc-CompleteIn-mRNAIntron	LTCONS_00041536	XM_017016154.1	chr10	66951159	66962546	11388	-	chr10	65912523	67231153	10063	-	*	0.8337	0.8104	0.22	0.06	0.62	0.55	0.16	0.67	0.22	0.01	0.09	1.69	0	0.02	0.1	0.42	0.05	0.33	0.24	0	0.02	0.53
cis_mRNA_overlap	0	Lnc-CompleteIn-mRNAIntron	LTCONS_00041537	XM_017016151.1	chr10	66965526	66969180	3655	-	chr10	65912523	67665658	10687	-	*	0.7515	0.6093	0.25	0.03	0.53	0.55	0.14	0.52	0.15	0	0.04	1.45	0	0	0.06	0	0	0	0	0	0	0.06
cis_mRNA_overlap	0	Lnc-CompleteIn-mRNAIntron	LTCONS_00041537	XM_017016152.1	chr10	66965526	66969180	3655	-	chr10	65912523	67696217	10984	-	*	0.6979	0.6833	0.25	0.03	0.53	0.55	0.14	0.52	0.15	0	0.04	1.45	0	0	0	0.05	0	0	0	0	0	0.04
cis_mRNA_overlap	0	Lnc-CompleteIn-mRNAIntron	LTCONS_00041537	XM_017016154.1	chr10	66965526	66969180	3655	-	chr10	65912523	67231153	10063	-	*	0.8337	0.7988	0.25	0.03	0.53	0.55	0.14	0.52	0.15	0	0.04	1.45	0	0.02	0.1	0.42	0.05	0.33	0.24	0	0.02	0.53
cis_mRNA_overlap	0	Lnc-CompleteIn-mRNAIntron	LTCONS_00041537	XM_017016155.1	chr10	66965526	66969180	3655	-	chr10	65912523	67387142	10073	-	*	0.8	0.6189	0.25	0.03	0.53	0.55	0.14	0.52	0.15	0	0.04	1.45	0.06	0	0.08	0	0	0	0	0	0	0.13
cis_mRNA_overlap	0	Lnc-CompleteIn-mRNAIntron	LTCONS_00041538	XM_017016151.1	chr10	66969360	66972631	3272	-	chr10	65912523	67665658	10687	-	*	0.7654	0.6093	0.14	0.07	0.6	0.48	0.11	0.63	0.31	0.01	0.06	1.78	0	0	0.06	0	0	0	0	0	0	0.06
cis_mRNA_overlap	0	Lnc-CompleteIn-mRNAIntron	LTCONS_00041538	XM_017016154.1	chr10	66969360	66972631	3272	-	chr10	65912523	67231153	10063	-	*	0.833	0.8415	0.14	0.07	0.6	0.48	0.11	0.63	0.31	0.01	0.06	1.78	0	0.02	0.1	0.42	0.05	0.33	0.24	0	0.02	0.53
cis_mRNA_overlap	0	Lnc-CompleteIn-mRNAIntron	LTCONS_00041539	XM_017016151.1	chr10	66972893	66978443	5551	-	chr10	65912523	67665658	10687	-	*	0.8331	0.6963	0.24	0.02	0.8	0.45	0.3	0.55	0.22	0	0.12	1.91	0	0	0.06	0	0	0	0	0	0	0.06
cis_mRNA_overlap	0	Lnc-CompleteIn-mRNAIntron	LTCONS_00041539	XM_017016154.1	chr10	66972893	66978443	5551	-	chr10	65912523	67231153	10063	-	*	0.748	0.7683	0.24	0.02	0.8	0.45	0.3	0.55	0.22	0	0.12	1.91	0	0.02	0.1	0.42	0.05	0.33	0.24	0	0.02	0.53
cis_mRNA_overlap	0	Lnc-CompleteIn-mRNAIntron	LTCONS_00041539	XM_017016155.1	chr10	66972893	66978443	5551	-	chr10	65912523	67387142	10073	-	*	0.8512	0.6338	0.24	0.02	0.8	0.45	0.3	0.55	0.22	0	0.12	1.91	0.06	0	0.08	0	0	0	0	0	0	0.13
cis_mRNA_overlap	0	Lnc-CompleteIn-mRNAIntron	LTCONS_00041540	XM_017016151.1	chr10	66985966	67011024	25059	-	chr10	65912523	67665658	10687	-	*	0.7842	0.6963	0.24	0.06	0.77	0.63	0.23	0.66	0.27	0.02	0.13	2.29	0	0	0.06	0	0	0	0	0	0	0.06
cis_mRNA_overlap	0	Lnc-CompleteIn-mRNAIntron	LTCONS_00041540	XM_017016154.1	chr10	66985966	67011024	25059	-	chr10	65912523	67231153	10063	-	*	0.8	0.8171	0.24	0.06	0.77	0.63	0.23	0.66	0.27	0.02	0.13	2.29	0	0.02	0.1	0.42	0.05	0.33	0.24	0	0.02	0.53
cis_mRNA_overlap	0	Lnc-CompleteIn-mRNAIntron	LTCONS_00041540	XM_017016155.1	chr10	66985966	67011024	25059	-	chr10	65912523	67387142	10073	-	*	0.8168	0.6338	0.24	0.06	0.77	0.63	0.23	0.66	0.27	0.02	0.13	2.29	0.06	0	0.08	0	0	0	0	0	0	0.13
cis_mRNA_overlap	0	Lnc-CompleteIn-mRNAIntron	LTCONS_00041541	XM_017016151.1	chr10	67018292	67021322	3031	-	chr10	65912523	67665658	10687	-	*	0.8292	0.6963	0.18	0.08	0.9	0.48	0.25	0.74	0.31	0.02	0.13	2.03	0	0	0.06	0	0	0	0	0	0	0.06
cis_mRNA_overlap	0	Lnc-CompleteIn-mRNAIntron	LTCONS_00041541	XM_017016154.1	chr10	67018292	67021322	3031	-	chr10	65912523	67231153	10063	-	*	0.7754	0.8598	0.18	0.08	0.9	0.48	0.25	0.74	0.31	0.02	0.13	2.03	0	0.02	0.1	0.42	0.05	0.33	0.24	0	0.02	0.53
cis_mRNA_overlap	0	Lnc-CompleteIn-mRNAIntron	LTCONS_00041542	XM_017016151.1	chr10	67021543	67022614	1072	-	chr10	65912523	67665658	10687	-	*	0.8951	0.6963	0.16	0.07	0.93	0.58	0.15	0.36	0.23	0	0.02	1.37	0	0	0.06	0	0	0	0	0	0	0.06
cis_mRNA_overlap	0	Lnc-CompleteIn-mRNAIntron	LTCONS_00041542	XM_017016154.1	chr10	67021543	67022614	1072	-	chr10	65912523	67231153	10063	-	*	0.7384	0.8293	0.16	0.07	0.93	0.58	0.15	0.36	0.23	0	0.02	1.37	0	0.02	0.1	0.42	0.05	0.33	0.24	0	0.02	0.53
cis_mRNA_overlap	0	Lnc-CompleteIn-mRNAIntron	LTCONS_00041542	XM_017016155.1	chr10	67021543	67022614	1072	-	chr10	65912523	67387142	10073	-	*	0.8351	0.6338	0.16	0.07	0.93	0.58	0.15	0.36	0.23	0	0.02	1.37	0.06	0	0.08	0	0	0	0	0	0	0.13
cis_mRNA_overlap	0	Lnc-CompleteIn-mRNAIntron	LTCONS_00041543	XM_017016151.1	chr10	67027580	67045403	17824	-	chr10	65912523	67665658	10687	-	*	0.8032	0.6963	0.2	0.07	0.79	0.5	0.31	0.66	0.33	0	0.14	2.1	0	0	0.06	0	0	0	0	0	0	0.06
cis_mRNA_overlap	0	Lnc-CompleteIn-mRNAIntron	LTCONS_00041543	XM_017016154.1	chr10	67027580	67045403	17824	-	chr10	65912523	67231153	10063	-	*	0.7834	0.8598	0.2	0.07	0.79	0.5	0.31	0.66	0.33	0	0.14	2.1	0	0.02	0.1	0.42	0.05	0.33	0.24	0	0.02	0.53
cis_mRNA_dw20k	6031	NA	LTCONS_00041585	NM_001033083.1	chr10	68202330	68279051	16560	-	chr10	68285081	68332927	1224	-	*	0.7282	0.6606	1.02	0.32	3.3	0.57	0.93	0.84	1.79	1.08	0.73	2.82	2.31	0.37	4.74	1.55	1.17	2.88	2.28	1.83	1.22	1.91
cis_mRNA_overlap	0	Lnc-AntiCompleteIn-mRNAIntron	LTCONS_00041795	NM_052836.3	chr10	71564926	71597638	354	-	chr10	71396934	71647462	2684	+	*	0.8691	0.7531	0	0	0.12	0	0	2.58	0	0	0	0.2	0.08	0.05	0.19	0.16	0.13	0.51	0.24	0.18	0.07	0.27
cis_mRNA_overlap	0	Lnc-AntiCompleteIn-mRNAIntron	LTCONS_00041795	XM_011540049.2	chr10	71564926	71597638	354	-	chr10	71396940	71795620	7338	+	*	0.8989	0.7663	0	0	0.12	0	0	2.58	0	0	0	0.2	0	0	0.01	0	0	0.02	0	0	0	0
cis_mRNA_overlap	0	Lnc-AntiCompleteIn-mRNAIntron	LTCONS_00041795	XM_011540051.2	chr10	71564926	71597638	354	-	chr10	71396940	71796011	7337	+	*	0.9341	0.7663	0	0	0.12	0	0	2.58	0	0	0	0.2	0	0	0.02	0	0	0.05	0	0	0	0
cis_mRNA_overlap	0	Lnc-AntiCompleteIn-mRNAIntron	LTCONS_00042153	NM_032024.4	chr10	75999259	76033527	4337	-	chr10	75782761	76557375	899	+	*	0.89	0.6197	0.03	0.08	0.15	0.12	1.41	0	0.21	0.42	0.06	0.3	0	0.01	0.15	0	0.42	0	0.1	0.06	0.12	0.03
cis_mRNA_dw20k	2007	NA	LTCONS_00042351	NM_153367.3	chr10	79379294	79380319	1026	-	chr10	79382325	79445627	4933	-	*	0.8763	0.8667	0.58	0.07	0.24	0.19	0.16	0.03	0.91	0	0.02	0.41	6.64	3.4	6.56	3.35	6.43	2.63	9.18	2.57	3.65	6.74
cis_mRNA_overlap	0	Lnc-AntiOverlap-mRNA	LTCONS_00042674	MTCONS_00035212	chr10	86965345	86971311	5758	-	chr10	86968431	87010203	3658	+	*	0.8422	0.6414	0.04	0.02	0.06	0.03	0.02	0	0.02	0	0	0	0.36	0	0.43	0.01	0.11	0.02	0.09	0.05	0	0
tran	NA	NA	LTCONS_00042719	XM_011511954.2	chr10	87238292	87342930	1650	-	chr2	127861630	127886408	5256	-	-974.91	0.688	0.6088	0	0	0.08	0.11	0	0	0	0	0	0	0.15	0	0.19	0.14	0.04	0.04	0	0.09	0	0
cis_mRNA_up10k	643	NA	LTCONS_00043086	NM_001198853.1	chr10	95070139	95071542	1404	-	chr10	95036772	95069497	1962	-	*	0.7379	0.6339	0.02	0.02	0.08	0.05	0.05	0.09	0.23	0	0.05	1.4	35.26	6.41	51.86	68.93	11.42	11.58	59.8	10.25	4.13	101.5
cis_mRNA_dw20k	1655	NA	LTCONS_00043440	NM_001308.2	chr10	100033642	100040654	7013	-	chr10	100042308	100081885	1756	-	*	0.8719	0.7112	0.56	0.69	0.73	0.19	0.51	0.17	2.02	0.1	0.1	1.18	23.6	39.09	24.65	23.83	27.08	5.57	75.79	1.59	8.26	20.21
cis_mRNA_dw20k	1012	NA	LTCONS_00048269	NM_000506.4	chr11	46740519	46748759	8241	+	chr11	46719166	46739508	2039	+	*	0.7653	0.8303	2.51	2.19	6.3	4.61	4.77	1.04	6.42	1.27	2.58	8.19	436.48	365.82	575.5	664.25	599.44	91.19	476.88	108.67	572.75	680.59
cis_mRNA_overlap	0	Lnc-AntiOverlap-mRNA	LTCONS_00048269	NM_001008938.3	chr11	46740519	46748759	8241	+	chr11	46743534	46846308	6714	-	*	-0.6277	-0.7234	2.51	2.19	6.3	4.61	4.77	1.04	6.42	1.27	2.58	8.19	5.15	5.93	4.75	3.99	9.92	15.89	4.46	18.26	5.74	4.75
cis_mRNA_overlap	0	Lnc-AntiOverlap-mRNA	LTCONS_00048269	NM_014756.3	chr11	46740519	46748759	8241	+	chr11	46743534	46846308	6534	-	*	0.6842	0.7979	2.51	2.19	6.3	4.61	4.77	1.04	6.42	1.27	2.58	8.19	0	0	0.12	0	0	0	0.46	0	0	0.21
cis_mRNA_dw20k	8911	NA	LTCONS_00048552	NM_001032295.1	chr11	57623763	57624611	849	+	chr11	57598232	57614853	1814	+	*	0.7743	0.6727	0.3	0.39	1	0.2	0.16	0.04	1.89	0.25	0.57	0.62	17.35	22.99	126.58	16.28	116.77	7.03	168.93	64.66	45.77	93.27
cis_mRNA_dw20k	10577	NA	LTCONS_00048553	NM_000062.2	chr11	57625429	57625888	460	+	chr11	57597554	57614853	1966	+	*	0.608	0.6121	0.48	0.21	0.97	0.26	0.18	0	0.83	0.45	0.41	1.47	116.35	53.11	141.08	136.7	181.23	26.61	201.02	67.01	108.84	181.61
cis_mRNA_dw20k	11734	NA	LTCONS_00048554	NM_001032295.1	chr11	57626586	57629728	3143	+	chr11	57598232	57614853	1814	+	*	0.7224	0.7052	0.32	0.32	0.6	0.3	0.29	0.09	1.42	0.36	0.48	1.28	17.35	22.99	126.58	16.28	116.77	7.03	168.93	64.66	45.77	93.27
cis_mRNA_dw20k	15050	NA	LTCONS_00048555	NM_000062.2	chr11	57629902	57630741	840	+	chr11	57597554	57614853	1966	+	*	0.6895	0.697	0.46	0.42	1.05	0.65	0.24	0.16	2.22	0.29	0.27	1.35	116.35	53.11	141.08	136.7	181.23	26.61	201.02	67.01	108.84	181.61
cis_mRNA_dw20k	10931	NA	LTCONS_00048964	MTCONS_00048941	chr11	61975395	61999921	2330	+	chr11	61946722	61964465	2043	+	*	-0.6199	-0.7435	0.15	0.09	0.11	0.13	0.42	1.43	0.32	1.52	0.78	0.53	0.2	0.15	0.13	0.08	0	0	0	0	0.06	0
cis_mRNA_dw20k	10931	NA	LTCONS_00048964	XM_005274221.3	chr11	61975395	61999921	2330	+	chr11	61949774	61964465	3615	+	*	0.6646	0.6833	0.15	0.09	0.11	0.13	0.42	1.43	0.32	1.52	0.78	0.53	0	0	0	0	0	0.78	0	0.1	0	0
cis_mRNA_dw20k	10931	NA	LTCONS_00048964	XM_017018229.1	chr11	61975395	61999921	2330	+	chr11	61949774	61964465	4204	+	*	0.762	0.7979	0.15	0.09	0.11	0.13	0.42	1.43	0.32	1.52	0.78	0.53	0	0	0	0	0	0.76	0	0.21	0.04	0
cis_mRNA_dw20k	10933	NA	LTCONS_00048964	NM_001300786.1	chr11	61975395	61999921	2330	+	chr11	61949884	61964463	2410	+	*	0.9058	0.6833	0.15	0.09	0.11	0.13	0.42	1.43	0.32	1.52	0.78	0.53	0	0	0	0	0	0.14	0	0.12	0	0
cis_mRNA_up10k	7763	NA	LTCONS_00048964	MTCONS_00056547	chr11	61975395	61999921	2330	+	chr11	61952468	61967633	937	-	*	0.6642	0.6242	0.15	0.09	0.11	0.13	0.42	1.43	0.32	1.52	0.78	0.53	221.93	255.81	272.16	275.94	578.36	311.37	303.39	1389.76	879.5	159.81
cis_mRNA_up10k	4297	NA	LTCONS_00049394	XM_017018642.1	chr11	65418472	65450093	28591	+	chr11	65454389	65456744	1532	+	*	0.955	0.6661	0	0	0	0	0.04	0.34	0	0.01	0	0.01	0.02	0.01	0	0	0.1	1.54	0.44	0.16	0	0.11
cis_mRNA_dw20k	2331	NA	LTCONS_00049421	XM_011545424.2	chr11	65459201	65460372	1172	+	chr11	65454389	65456871	1322	+	*	0.9587	0.799	0.06	0.04	0.13	0	0.08	1.37	0.61	0.82	0	0.06	0.03	0	0.07	0.02	0	0.32	0.09	0.13	0	0
cis_mRNA_dw20k	2458	NA	LTCONS_00049421	XM_017018642.1	chr11	65459201	65460372	1172	+	chr11	65454389	65456744	1532	+	*	0.8868	0.784	0.06	0.04	0.13	0	0.08	1.37	0.61	0.82	0	0.06	0.02	0.01	0	0	0.1	1.54	0.44	0.16	0	0.11
cis_mRNA_overlap	0	Lnc-CompleteIn-mRNAIntron	LTCONS_00049421	XM_005274417.3	chr11	65459201	65460372	1172	+	chr11	65454389	65466991	1995	+	*	0.9879	0.8177	0.06	0.04	0.13	0	0.08	1.37	0.61	0.82	0	0.06	0	0	0	0	0	0.13	0.04	0.06	0	0
cis_mRNA_overlap	0	Lnc-AntiOverlap-mRNA	LTCONS_00049611	MTCONS_00057315	chr11	66347170	66369168	7376	+	chr11	66362521	66372476	2542	-	*	-0.6578	-0.6875	0.04	0.16	0	0.07	0.16	0.17	0.02	0.13	0.19	0.07	0	0	0.07	0	0	0	0.11	0	0	0
cis_mRNA_overlap	0	Lnc-AntiOverlap-mRNA	LTCONS_00049611	NM_001532.2	chr11	66347170	66369168	7376	+	chr11	66362521	66371820	2515	-	*	0.7564	0.6975	0.04	0.16	0	0.07	0.16	0.17	0.02	0.13	0.19	0.07	0	0.14	0.2	0	0.44	0.58	0	0.6	0.93	0.12
cis_mRNA_overlap	0	Lnc-AntiOverlap-mRNA	LTCONS_00049611	NM_006876.2	chr11	66347170	66369168	7376	+	chr11	66345372	66347690	2070	-	-1309.1	0.7825	0.811	0.04	0.16	0	0.07	0.16	0.17	0.02	0.13	0.19	0.07	6.47	8.41	5.86	7.82	12.23	8.97	4.29	12.46	9.98	7.44
cis_mRNA_up10k	2060	NA	LTCONS_00049611	NM_015399.3	chr11	66347170	66369168	7376	+	chr11	66337333	66345111	1437	-	*	0.6915	0.6585	0.04	0.16	0	0.07	0.16	0.17	0.02	0.13	0.19	0.07	8.2	10.62	6.64	5.99	16.48	15.77	6.45	27.17	18.64	5.18
cis_mRNA_overlap	0	Lnc-CompleteIn-mRNAIntron	LTCONS_00049690	NM_001302084.1	chr11	66807492	66813499	6008	+	chr11	66744736	66843516	2031	+	*	0.7883	0.8379	0.19	0.31	0.24	0.09	0.81	0.9	0.31	0.9	1.57	0.23	0.29	0.94	0.2	0	0.5	0.8	0.31	0.32	1.56	0
cis_mRNA_overlap	0	Lnc-CompleteIn-mRNAIntron	LTCONS_00049690	NM_024650.3	chr11	66807492	66813499	6008	+	chr11	66744736	66843516	2323	+	*	0.8622	0.6951	0.19	0.31	0.24	0.09	0.81	0.9	0.31	0.9	1.57	0.23	0.45	0.65	0.27	0.46	0.84	0.63	0.24	0.8	1.13	0.16
cis_mRNA_overlap	0	Lnc-Overlap-mRNA	LTCONS_00050086	NM_001293291.1	chr11	69294138	69356175	15105	+	chr11	69294138	69297287	2398	+	*	0.9502	0.7183	0.01	0	1.07	0.02	0.02	0.01	1.24	0.02	0.01	0.19	0	0	0.27	0	0	0	0.57	0	0	0
cis_mRNA_overlap	0	Lnc-Overlap-mRNA	LTCONS_00050086	NM_001293294.1	chr11	69294138	69356175	15105	+	chr11	69294138	69297287	2494	+	*	0.9852	0.8179	0.01	0	1.07	0.02	0.02	0.01	1.24	0.02	0.01	0.19	0	0	0.7	0	0	0	0.61	0	0	0.05
cis_mRNA_overlap	0	Lnc-Overlap-mRNA	LTCONS_00050086	NM_001293296.1	chr11	69294138	69356175	15105	+	chr11	69294138	69297287	2326	+	*	0.9377	0.6956	0.01	0	1.07	0.02	0.02	0.01	1.24	0.02	0.01	0.19	0	0	0.3	0.09	0	0	0.24	0	0	0
cis_mRNA_up10k	59	NA	LTCONS_00050117	NM_153451.2	chr11	69675455	69676936	1482	+	chr11	69665563	69675397	2528	-	*	0.9966	0.7403	0.04	0.03	0	0	0.04	0.89	0	0.09	0.02	0	1.23	0.9	1.15	0.54	1.46	11.2	1	2.38	0.84	0.96
cis_mRNA_dw20k	2342	NA	LTCONS_00050729	NM_001311199.1	chr11	77614450	77616199	1750	+	chr11	77618540	77637806	976	-	*	-0.6122	-0.6848	0.77	0.55	1.75	1.98	0.8	0.19	1.21	0.94	0.51	1.41	0.88	1.65	0.85	0.16	1.95	1.41	0.59	0.3	0.97	0.92
cis_mRNA_dw20k	4095	NA	LTCONS_00050729	NM_173039.2	chr11	77614450	77616199	1750	+	chr11	77589635	77610356	2153	+	*	0.9099	0.8424	0.77	0.55	1.75	1.98	0.8	0.19	1.21	0.94	0.51	1.41	3.41	2.65	4.77	5.3	2.62	1.2	2.88	3.94	2.75	3.89
cis_mRNA_overlap	0	Lnc-AntiOverlap-mRNA	LTCONS_00050908	NM_001286117.1	chr11	83286120	83308640	17598	+	chr11	83259093	83286407	4338	-	*	0.8863	0.635	0	0	0.03	0	0	0	0.04	0	0.02	0.14	0.1	0.2	0.16	0.14	0.07	0.13	0.27	0	0.08	0.47
cis_mRNA_overlap	0	Lnc-AntiOverlap-mRNA	LTCONS_00050908	XM_005274154.2	chr11	83286120	83308640	17598	+	chr11	83261063	83286346	2203	-	*	-0.6609	-0.6213	0	0	0.03	0	0	0	0.04	0	0.02	0.14	2.12	2.23	1.13	1.46	0.94	0.8	0.72	1.8	1.64	0.28
cis_mRNA_overlap	0	Lnc-CompleteIn-mRNAIntron	LTCONS_00051521	XM_017017926.1	chr11	99061312	99064692	3381	+	chr11	99020904	100358885	6640	+	*	0.6657	0.6398	0.01	0	0	0	0.72	0.06	0.01	0	0	0	0.02	0	0	0	0.02	0	0	0	0	0
cis_mRNA_overlap	0	Lnc-CompleteIn-mRNAIntron	LTCONS_00051521	XM_017017927.1	chr11	99061312	99064692	3381	+	chr11	99020904	100203266	3106	+	*	0.989	0.6603	0.01	0	0	0	0.72	0.06	0.01	0	0	0	0.01	0	0	0	0.08	0	0	0	0	0
cis_mRNA_overlap	0	Lnc-CompleteIn-mRNAIntron	LTCONS_00051521	XM_017017928.1	chr11	99061312	99064692	3381	+	chr11	99020904	100203266	2871	+	*	0.9685	0.7924	0.01	0	0	0	0.72	0.06	0.01	0	0	0	0	0	0	0	0.06	0.02	0	0	0	0
cis_mRNA_overlap	0	Lnc-AntiOverlap-mRNA	LTCONS_00051617	NM_002421.3	chr11	102783676	103049396	3183	+	chr11	102789910	102798235	2055	-	*	0.6904	0.641	0	0.19	0.04	0	0.22	0.05	0	0.09	0	0	0	0.02	0	0	2.96	0	0	0.43	0.29	0
cis_mRNA_overlap	0	Lnc-AntiCompleteIn-mRNAIntron	LTCONS_00051859	MTCONS_00059423	chr11	111794265	111803226	6769	+	chr11	111766738	111871581	5046	-	*	0.8204	0.7669	0.78	0.02	0.68	1.2	0.06	0.02	1.47	0.02	0.05	0.98	2.12	1.55	2.27	2.1	1.19	1.11	4.8	0.45	0.42	1.6
cis_mRNA_overlap	0	Lnc-AntiCompleteIn-mRNAIntron	LTCONS_00051859	NM_001077690.1	chr11	111794265	111803226	6769	+	chr11	111782195	111871581	6137	-	*	-0.6075	-0.6585	0.78	0.02	0.68	1.2	0.06	0.02	1.47	0.02	0.05	0.98	0.08	0.09	0.12	0.17	1.25	0.93	0	1.85	0.2	0
cis_mRNA_overlap	0	Lnc-AntiCompleteIn-mRNAIntron	LTCONS_00051859	NM_001077691.1	chr11	111794265	111803226	6769	+	chr11	111782195	111871281	6435	-	*	0.7288	0.6705	0.78	0.02	0.68	1.2	0.06	0.02	1.47	0.02	0.05	0.98	0.14	0	0.4	0	0	0	0.97	0	0	0.34
cis_mRNA_overlap	0	Lnc-AntiCompleteIn-mRNAIntron	LTCONS_00051859	XM_017018313.1	chr11	111794265	111803226	6769	+	chr11	111786284	111871581	2177	-	*	-0.6546	-0.7596	0.78	0.02	0.68	1.2	0.06	0.02	1.47	0.02	0.05	0.98	0.13	0.38	0	0	1.88	1.09	0	1.46	0.04	0
cis_mRNA_dw20k	1246	NA	LTCONS_00053179	XM_005271400.4	chr11	129860448	129862806	2359	+	chr11	129815828	129859203	1532	+	*	0.9963	0.9362	1.77	2.64	0.92	0.71	9.76	0.06	0.75	0.04	2.37	0.25	1.43	2.91	0.71	1.19	11.48	0	0.51	0	2.66	0.52
cis_mRNA_dw20k	1246	NA	LTCONS_00053179	XM_011542586.2	chr11	129860448	129862806	2359	+	chr11	129815827	129859203	1576	+	*	0.9881	0.9848	1.77	2.64	0.92	0.71	9.76	0.06	0.75	0.04	2.37	0.25	6.97	6.98	2.39	1.3	25.54	0	1.4	0	9.11	0.82
cis_mRNA_dw20k	1246	NA	LTCONS_00053179	XM_011542588.2	chr11	129860448	129862806	2359	+	chr11	129815781	129859203	1527	+	*	0.8146	0.7091	1.77	2.64	0.92	0.71	9.76	0.06	0.75	0.04	2.37	0.25	0.13	0.57	0.64	0.26	1.17	0.11	0.59	0.16	0.67	0
cis_mRNA_dw20k	1246	NA	LTCONS_00053179	XM_017017188.1	chr11	129860448	129862806	2359	+	chr11	129815828	129859203	1682	+	*	0.9734	0.9362	1.77	2.64	0.92	0.71	9.76	0.06	0.75	0.04	2.37	0.25	0.55	1.64	0.74	0.13	5.45	0	0.18	0	2.27	0.45
cis_mRNA_dw20k	446	NA	LTCONS_00053179	NM_138788.3	chr11	129860448	129862806	2359	+	chr11	129815846	129860003	2207	+	*	0.9869	0.9758	1.77	2.64	0.92	0.71	9.76	0.06	0.75	0.04	2.37	0.25	18.02	24.73	8.23	6.66	71.68	0.13	4.69	0.08	27.61	2.34
cis_mRNA_dw20k	2980	NA	LTCONS_00053180	NM_138788.3	chr11	129862982	129866929	3948	+	chr11	129815846	129860003	2207	+	*	0.9866	0.9273	0.35	0.39	0.17	0.08	1.65	0.01	0.21	0.02	0.61	0.15	18.02	24.73	8.23	6.66	71.68	0.13	4.69	0.08	27.61	2.34
cis_mRNA_dw20k	3780	NA	LTCONS_00053180	XM_005271400.4	chr11	129862982	129866929	3948	+	chr11	129815828	129859203	1532	+	*	0.9817	0.8754	0.35	0.39	0.17	0.08	1.65	0.01	0.21	0.02	0.61	0.15	1.43	2.91	0.71	1.19	11.48	0	0.51	0	2.66	0.52
cis_mRNA_dw20k	3780	NA	LTCONS_00053180	XM_011542586.2	chr11	129862982	129866929	3948	+	chr11	129815827	129859203	1576	+	*	0.992	0.9726	0.35	0.39	0.17	0.08	1.65	0.01	0.21	0.02	0.61	0.15	6.97	6.98	2.39	1.3	25.54	0	1.4	0	9.11	0.82
cis_mRNA_dw20k	3780	NA	LTCONS_00053180	XM_011542588.2	chr11	129862982	129866929	3948	+	chr11	129815781	129859203	1527	+	*	0.8188	0.7091	0.35	0.39	0.17	0.08	1.65	0.01	0.21	0.02	0.61	0.15	0.13	0.57	0.64	0.26	1.17	0.11	0.59	0.16	0.67	0
cis_mRNA_dw20k	3780	NA	LTCONS_00053180	XM_017017188.1	chr11	129862982	129866929	3948	+	chr11	129815828	129859203	1682	+	*	0.9839	0.9362	0.35	0.39	0.17	0.08	1.65	0.01	0.21	0.02	0.61	0.15	0.55	1.64	0.74	0.13	5.45	0	0.18	0	2.27	0.45
cis_mRNA_overlap	0	Lnc-Overlap-mRNA	LTCONS_00054089	MTCONS_00054076	chr11	5880939	5938136	665	-	chr11	5663195	5938628	3528	-	*	0.712	0.9344	0	1.26	0	0	0.65	0.91	0	0	1.26	0	0	0.21	0	0	0.27	0.39	0	0	1.78	0
cis_mRNA_up10k	9212	NA	LTCONS_00054089	NM_001003443.2	chr11	5880939	5938136	665	-	chr11	5947347	5948294	948	+	*	0.6095	0.8602	0	1.26	0	0	0.65	0.91	0	0	1.26	0	0	0.13	0	0	0	0.7	0	0	0.26	0
cis_mRNA_overlap	0	Lnc-CompleteIn-mRNAIntron	LTCONS_00054090	MTCONS_00054076	chr11	5883664	5886151	2488	-	chr11	5663195	5938628	3528	-	*	0.6545	0.8905	0	0.62	0	0.01	0.38	0.92	0	0	0.73	0.01	0	0.21	0	0	0.27	0.39	0	0	1.78	0
cis_mRNA_dw20k	2685	NA	LTCONS_00056302	NM_198947.3	chr11	59130099	59143015	6539	-	chr11	59107185	59127415	3561	+	*	0.7565	0.7823	0	0.24	0	0.12	0.15	0.13	0	0.28	0	0	1.12	2.16	0.17	0.3	1.19	4.22	0.32	4.86	0.44	0
cis_mRNA_overlap	0	mRNA-CompleteIn-LncExon	LTCONS_00056391	XM_011545416.2	chr11	60199659	60243149	30559	-	chr11	60203720	60243124	1577	-	*	0.6489	0.6691	0.8	0.32	1.21	0.9	0.76	0.24	0.65	0.3	0.49	1.57	0.03	0	0.16	0	0	0	0	0	0.02	0.06
cis_mRNA_overlap	0	Lnc-Overlap-mRNA	LTCONS_00056526	NM_021727.4	chr11	61873523	61877258	1449	-	chr11	61873523	61891545	1793	-	-1037.21	0.987	0.9058	0.34	0.73	0.89	0.4	1.12	1.12	0.76	7.18	1.34	0.38	1.7	3.01	2.07	1.42	3.07	4.6	2.01	14.53	3.94	1.25
cis_mRNA_dw20k	5368	NA	LTCONS_00057437	NM_004584.2	chr11	67403779	67415547	11241	-	chr11	67391952	67398412	2122	+	*	0.9804	0.6003	0.03	0.04	0.18	0.08	0.08	0.92	0.14	0.23	0.08	0.08	0.17	0.43	0.86	0.32	0.88	9.92	0.08	1.03	0.77	0.29
cis_mRNA_dw20k	5370	NA	LTCONS_00057437	XM_006718652.3	chr11	67403779	67415547	11241	-	chr11	67392244	67398410	2332	+	*	0.9884	0.7119	0.03	0.04	0.18	0.08	0.08	0.92	0.14	0.23	0.08	0.08	0.33	0.35	0.45	0.29	0.58	6.15	0.53	1.18	0.25	0.45
cis_mRNA_dw20k	19917	NA	LTCONS_00057438	XM_006718652.3	chr11	67418326	67420058	1733	-	chr11	67392244	67398410	2332	+	*	0.9983	0.8268	0.05	0.1	0.33	0.19	0.3	5.13	0.41	0.73	0.17	0.32	0.33	0.35	0.45	0.29	0.58	6.15	0.53	1.18	0.25	0.45
cis_mRNA_dw20k	13764	NA	LTCONS_00057439	NM_020441.2	chr11	67423686	67424284	599	-	chr11	67438047	67443512	1910	-	*	0.9352	0.7979	0	0	0	0	0.12	1.23	0	0.06	0	0	6.6	10.72	7.23	9.18	15.01	63.96	10.46	31.19	13.74	9.48
cis_mRNA_up10k	4181	NA	LTCONS_00057439	NM_003952.2	chr11	67423686	67424284	599	-	chr11	67428464	67435408	1770	+	*	0.9975	0.7979	0	0	0	0	0.12	1.23	0	0.06	0	0	8.38	10.42	7.79	6.38	11.82	105.41	7.17	12.9	9.02	8.48
cis_mRNA_dw20k	11290	NA	LTCONS_00057873	NM_001243719.1	chr11	73661800	73664349	2550	-	chr11	73675638	73760093	2863	-	*	0.7133	0.6687	0.16	0.03	0.14	0.06	0.02	0.07	0.84	0.04	0.04	0.37	5.23	2.79	1.86	0	0.93	4.64	7.98	4.08	4.25	4.39
cis_mRNA_dw20k	1732	NA	LTCONS_00058347	NM_005040.3	chr11	82818182	82821209	3028	-	chr11	82822940	82900603	3658	-	*	0.6821	0.7576	0.51	0.23	0.48	0.19	0.06	0.04	0.69	0.14	0.03	0.56	10.29	7.95	7.82	6.94	3.5	2.08	5.89	5.11	5	9.08
cis_mRNA_overlap	0	Lnc-CompleteIn-mRNAIntron	LTCONS_00058479	XM_017017269.1	chr11	83668128	83668591	464	-	chr11	83455009	85133802	8457	-	*	0.908	0.7111	0.07	0	0.88	0.19	0.18	0	0.16	0	0	0.48	0	0	0.05	0	0	0	0.01	0	0	0.05
cis_mRNA_overlap	0	Lnc-CompleteIn-mRNAIntron	LTCONS_00058482	XM_017017258.1	chr11	84761105	84776710	15606	-	chr11	83455009	85380379	8980	-	*	0.9227	0.7915	0.1	0.09	0.33	0.13	0.05	0.03	0.34	0.17	0.07	0.69	0.02	0.03	0.04	0.02	0.01	0.03	0.05	0.04	0.01	0.19
cis_mRNA_overlap	0	Lnc-CompleteIn-mRNAIntron	LTCONS_00058482	XM_017017267.1	chr11	84761105	84776710	15606	-	chr11	83455009	84923589	7935	-	*	0.6329	0.6458	0.1	0.09	0.33	0.13	0.05	0.03	0.34	0.17	0.07	0.69	0	0	0	0.02	0	0	0.02	0	0	0.02
cis_mRNA_overlap	0	Lnc-CompleteIn-mRNAIntron	LTCONS_00058482	XM_017017269.1	chr11	84761105	84776710	15606	-	chr11	83455009	85133802	8457	-	*	0.8508	0.7866	0.1	0.09	0.33	0.13	0.05	0.03	0.34	0.17	0.07	0.69	0	0	0.05	0	0	0	0.01	0	0	0.05
cis_mRNA_overlap	0	Lnc-CompleteIn-mRNAIntron	LTCONS_00058483	XM_017017258.1	chr11	84879829	84892684	12856	-	chr11	83455009	85380379	8980	-	*	0.8401	0.8677	0.22	0.15	0.52	0.19	0.13	0.13	0.61	0.33	0.12	0.83	0.02	0.03	0.04	0.02	0.01	0.03	0.05	0.04	0.01	0.19
cis_mRNA_overlap	0	Lnc-CompleteIn-mRNAIntron	LTCONS_00058483	XM_017017269.1	chr11	84879829	84892684	12856	-	chr11	83455009	85133802	8457	-	*	0.8214	0.789	0.22	0.15	0.52	0.19	0.13	0.13	0.61	0.33	0.12	0.83	0	0	0.05	0	0	0	0.01	0	0	0.05
cis_mRNA_overlap	0	Lnc-CompleteIn-mRNAIntron	LTCONS_00058484	XM_017017258.1	chr11	84892971	84898612	5642	-	chr11	83455009	85380379	8980	-	*	0.8466	0.6154	0.17	0.15	0.58	0.27	0.06	0.02	0.45	0.14	0.14	0.9	0.02	0.03	0.04	0.02	0.01	0.03	0.05	0.04	0.01	0.19
cis_mRNA_overlap	0	Lnc-CompleteIn-mRNAIntron	LTCONS_00058484	XM_017017267.1	chr11	84892971	84898612	5642	-	chr11	83455009	84923589	7935	-	*	0.6294	0.6477	0.17	0.15	0.58	0.27	0.06	0.02	0.45	0.14	0.14	0.9	0	0	0	0.02	0	0	0.02	0	0	0.02
cis_mRNA_overlap	0	Lnc-CompleteIn-mRNAIntron	LTCONS_00058484	XM_017017269.1	chr11	84892971	84898612	5642	-	chr11	83455009	85133802	8457	-	*	0.9057	0.8115	0.17	0.15	0.58	0.27	0.06	0.02	0.45	0.14	0.14	0.9	0	0	0.05	0	0	0	0.01	0	0	0.05
cis_mRNA_overlap	0	Lnc-CompleteIn-mRNAIntron	LTCONS_00058485	XM_017017258.1	chr11	84951638	84960574	8937	-	chr11	83455009	85380379	8980	-	*	0.8056	0.7693	0.16	0.13	0.68	0.24	0.09	0.06	0.72	0.19	0.06	1	0.02	0.03	0.04	0.02	0.01	0.03	0.05	0.04	0.01	0.19
cis_mRNA_overlap	0	Lnc-CompleteIn-mRNAIntron	LTCONS_00058485	XM_017017269.1	chr11	84951638	84960574	8937	-	chr11	83455009	85133802	8457	-	*	0.8649	0.789	0.16	0.13	0.68	0.24	0.09	0.06	0.72	0.19	0.06	1	0	0	0.05	0	0	0	0.01	0	0	0.05
cis_mRNA_overlap	0	Lnc-Overlap-mRNA	LTCONS_00058769	XM_011542910.2	chr11	93499643	93542908	43206	-	chr11	93478472	93535980	1739	-	*	0.6184	0.6142	0.7	0.23	1.53	0.28	1.35	0.71	3.22	1.16	0.14	2.16	0.13	0	0.34	0.16	0	0	0.24	0	0	0.39
cis_mRNA_overlap	0	Lnc-Overlap-mRNA	LTCONS_00058887	XM_005273775.4	chr11	95768942	95790965	5011	-	chr11	95768953	95790132	4279	-	-1537.87	0.6036	0.6707	0.9	0.68	1.45	1.11	0.92	0.2	1.23	0.4	0.46	1.33	0.3	0.12	0.47	0.06	0.23	0	0.07	0.05	0	0.12
cis_mRNA_dw20k	3389	NA	LTCONS_00059422	NM_001077690.1	chr11	111766738	111778807	8222	-	chr11	111782195	111871581	6137	-	*	-0.6035	-0.8146	1.99	0.85	1.98	1.32	1.11	1.19	3.17	0.33	0.59	2.44	0.08	0.09	0.12	0.17	1.25	0.93	0	1.85	0.2	0
cis_mRNA_dw20k	3389	NA	LTCONS_00059422	NM_001077691.1	chr11	111766738	111778807	8222	-	chr11	111782195	111871281	6435	-	*	0.8791	0.8467	1.99	0.85	1.98	1.32	1.11	1.19	3.17	0.33	0.59	2.44	0.14	0	0.4	0	0	0	0.97	0	0	0.34
cis_mRNA_overlap	0	Lnc-Overlap-mRNA	LTCONS_00059422	MTCONS_00059423	chr11	111766738	111778807	8222	-	chr11	111766738	111871581	5046	-	-2587.54	0.8636	0.8545	1.99	0.85	1.98	1.32	1.11	1.19	3.17	0.33	0.59	2.44	2.12	1.55	2.27	2.1	1.19	1.11	4.8	0.45	0.42	1.6
cis_mRNA_up10k	294	NA	LTCONS_00059422	NM_181699.2	chr11	111766738	111778807	8222	-	chr11	111726908	111766445	2145	-	*	0.6355	0.6485	1.99	0.85	1.98	1.32	1.11	1.19	3.17	0.33	0.59	2.44	9.66	12.49	2.81	3.74	2.13	0.73	15.36	1.14	0	6.83
cis_mRNA_dw20k	7627	NA	LTCONS_00060925	NM_001003443.2	chr11	5955920	5960471	4552	.	chr11	5947347	5948294	948	+	*	0.9887	1	0	0.02	0	0	0	0.21	0	0	0.05	0	0	0.13	0	0	0	0.7	0	0	0.26	0
cis_mRNA_dw20k	6532	NA	LTCONS_00061184	NM_001318021.1	chr11	116828197	116829220	1024	.	chr11	116835751	116837950	1183	-	*	0.6442	0.7664	0.23	0.02	0.19	0.93	0.1	0.22	0.41	0.05	0.19	0.26	0	0	0	0.04	0	0	0.05	0	0	0.05
tran	NA	NA	LTCONS_00061282	NM_001302862.1	chr11_KI270831v1_alt	120310	136054	918	-	chr11	2887344	2903945	1905	-	-680.43	0.7884	0.6239	0	0.03	0.25	0.11	0.72	0.08	0.11	0	1.2	0.32	0.13	0.04	0.16	0	0.29	0.05	0.03	0	0.23	0.08
tran	NA	NA	LTCONS_00061282	NM_007105.3	chr11_KI270831v1_alt	120310	136054	918	-	chr11	2887344	2903945	2300	-	-682.9	0.8099	0.7408	0	0.03	0.25	0.11	0.72	0.08	0.11	0	1.2	0.32	0	0	0.07	0.06	0.15	0	0.02	0.05	0.12	0.03
cis_mRNA_overlap	0	Lnc-AntiOverlap-mRNA	LTCONS_00061283	MTCONS_00061280	chr11_KI270831v1_alt	134872	136040	420	-	chr11_KI270831v1_alt	135524	157364	1363	+	*	0.7467	0.8182	0.28	0.19	0.5	0.39	4.37	0.91	0.44	0.58	1.77	0.38	3.92	5.77	11.28	8.91	29.77	9.54	5.47	8.85	40.54	5.26
tran	NA	NA	LTCONS_00061283	NM_007105.3	chr11_KI270831v1_alt	134872	136040	420	-	chr11	2887344	2903945	2300	-	-354.56	0.8152	0.6565	0.28	0.19	0.5	0.39	4.37	0.91	0.44	0.58	1.77	0.38	0	0	0.07	0.06	0.15	0	0.02	0.05	0.12	0.03
tran	NA	NA	LTCONS_00061324	MTCONS_00053758	chr11_KI270903v1_alt	208547	209175	629	-	chr11	1732410	1748546	3810	-	-573.8	0.7599	0.8066	2.97	0.85	7.06	5.05	1.18	0.12	2.67	1.02	0.04	5.69	0.09	0	0.26	0.17	0.04	0	0.18	0	0	0.03
tran	NA	NA	LTCONS_00061324	NM_001170820.3	chr11_KI270903v1_alt	208547	209175	629	-	chr11	1732410	1750594	3709	-	-573.8	0.9296	0.9726	2.97	0.85	7.06	5.05	1.18	0.12	2.67	1.02	0.04	5.69	0.23	0.06	0.82	0.47	0.22	0	0.24	0.09	0	0.34
cis_mRNA_overlap	0	Lnc-CompleteIn-mRNAIntron	LTCONS_00061584	XM_011521023.2	chr12	2161333	2232997	71626	+	chr12	2053011	2697946	13791	+	*	0.989	0.7778	0.11	0.04	0.29	0.13	0.71	0.14	0.29	6.58	0.07	0.09	0	0.02	0.1	0	0.26	0.04	0.08	1.07	0.04	0
cis_mRNA_overlap	0	Lnc-CompleteIn-mRNAIntron	LTCONS_00061584	XM_017019930.1	chr12	2161333	2232997	71626	+	chr12	1969677	2691199	8250	+	*	0.7289	0.6984	0.11	0.04	0.29	0.13	0.71	0.14	0.29	6.58	0.07	0.09	0	0	0	0	0.03	0	0	0.03	0	0
cis_mRNA_overlap	0	Lnc-CompleteIn-mRNAIntron	LTCONS_00061584	XM_017019951.1	chr12	2161333	2232997	71626	+	chr12	1969677	2691199	7962	+	*	0.9991	0.7853	0.11	0.04	0.29	0.13	0.71	0.14	0.29	6.58	0.07	0.09	0	0	0.05	0	0.15	0	0	1.3	0	0
cis_mRNA_overlap	0	Lnc-AntiOverlap-mRNA	LTCONS_00062039	XM_005253528.4	chr12	7493197	7499355	723	+	chr12	7470974	7503808	4038	-	-775.28	-0.6176	-0.7091	0.16	1.61	0.53	0.47	0.49	0.8	0.31	0.6	1.24	0.71	0.4	0.08	0.79	0.94	0.66	0.21	1.1	0.12	0.27	0.57
cis_mRNA_dw20k	5182	NA	LTCONS_00062239	XM_017019684.1	chr12	8788274	8795824	2007	+	chr12	8681677	8783093	8496	+	*	0.7517	0.7306	0.03	3.57	0.45	0.36	1.23	0	0.35	0.28	0.19	0.1	0	0.14	0	0.1	0.11	0	0	0.07	0	0
cis_mRNA_overlap	0	Lnc-AntiOverlap-mRNA	LTCONS_00062285	MTCONS_00070124	chr12	9138769	9197581	56424	+	chr12	9148840	9208370	5489	-	*	0.6141	0.7538	1.94	0.51	1.57	0.72	0.11	2.21	1.96	0.34	0.23	2.43	0.22	0.02	0.63	1.04	0.02	0.15	2.18	0	0.04	2.52
cis_mRNA_up10k	437	NA	LTCONS_00062528	NM_004064.4	chr12	12716161	12716834	674	+	chr12	12717270	12722383	2523	+	*	0.8502	0.6485	0.08	0.28	0	0.16	0.43	0.95	0.05	0.44	0.32	0.46	17.63	16.37	11.91	12.32	13.72	36.71	9.05	18.79	14.77	14.53
cis_mRNA_overlap	0	Lnc-AntiOverlap-mRNA	LTCONS_00062635	NM_024829.5	chr12	14567479	14623244	4559	+	chr12	14503663	14567857	1932	-	*	0.7602	0.635	0.05	0	0	0	0.04	0.1	0	0.13	0	0	3.6	1.38	1.35	1.65	1.23	5.16	2.77	3.79	0.52	2.42
cis_mRNA_overlap	0	Lnc-AntiOverlap-mRNA	LTCONS_00064130	NM_006082.2	chr12	49130989	49168865	21411	+	chr12	49127782	49131521	1753	-	*	0.6332	0.6151	0.01	0	0.03	0	0.01	0.04	0.02	0.07	0.01	0	71.11	103.31	54.76	31.75	127.94	359.55	63.9	201.25	53.14	42.25
cis_mRNA_up10k	893	NA	LTCONS_00064153	NM_001304944.1	chr12	49345617	49346025	409	+	chr12	49346917	49353684	4412	+	*	0.6871	0.8692	0.25	0	1.34	0.63	0.42	0	0	0	0.08	0.46	3.37	1.31	3.55	4.3	2.99	0.05	1	0.24	2.79	2.15
cis_mRNA_dw20k	7030	NA	LTCONS_00064164	NM_024902.3	chr12	49360713	49361192	480	+	chr12	49346917	49353684	3950	+	*	0.7903	0.7416	0.45	0.45	1.14	0.8	0.67	0.25	1.33	0.6	0.19	1.37	5.91	7.09	10.91	5.06	5.89	3.93	9.09	7.12	4.66	8.19
cis_mRNA_overlap	0	Lnc-Overlap-mRNA	LTCONS_00064513	NM_001202234.1	chr12	52037179	52046643	5092	+	chr12	52037715	52059507	3517	+	-2694.5	-0.6166	-0.6271	0.2	0	0.18	0	0.1	0	0.11	0	0	0	0	0.1	0.03	0.08	0.16	0.17	0	0.09	0.08	0.1
cis_mRNA_up10k	4760	NA	LTCONS_00064513	NM_002135.4	chr12	52037179	52046643	5092	+	chr12	52051402	52059507	2679	+	*	0.6897	0.7284	0.2	0	0.18	0	0.1	0	0.11	0	0	0	0.97	0	0.59	0.55	0	0	0.82	0	0	0.41
cis_mRNA_dw20k	18369	NA	LTCONS_00065199	NM_015433.2	chr12	57800909	57801450	542	+	chr12	57772600	57782541	2701	+	*	0.6575	0.6079	0	0.22	0.13	0.05	0.28	1.12	0.4	0.8	0.05	0.37	1.15	1.85	0.93	1.24	1.56	2.56	1.37	4.81	2.1	1.33
cis_mRNA_up10k	1933	NA	LTCONS_00065601	XM_005268872.4	chr12	68804820	68806907	2088	+	chr12	68808839	68845429	7308	+	*	0.7389	0.6121	0.16	1.99	0.65	0.73	0.29	3.81	1.4	3.24	0.98	1.13	11.1	12.98	10.49	6.25	5.11	48.98	10.92	11.7	1.3	9.99
cis_mRNA_overlap	0	Lnc-Overlap-mRNA	LTCONS_00065689	NM_175624.3	chr12	69738686	69823204	10691	+	chr12	69738686	69823204	9412	+	*	0.9085	0.7877	0.07	0.15	0.01	0.06	0.31	0.12	0	0.12	0	0.03	0	0.03	0	0	0.05	0.02	0	0	0	0
tran	NA	NA	LTCONS_00066308	NM_001199741.1	chr12	87816004	87821547	4411	+	chr1	67685177	67688338	1278	+	-601.8	0.8004	0.7263	1.01	0.01	1.15	1.09	0.09	0.76	0.5	0.01	0.02	0.37	0.73	0.14	1.14	0.28	0	0.58	0	0	0	0
cis_mRNA_overlap	0	Lnc-AntiOverlap-mRNA	LTCONS_00066369	NM_172240.2	chr12	89524031	89603134	21540	+	chr12	89419718	89526262	3239	-	*	0.8862	0.7022	0	0.01	0.01	0	0.02	0.05	0.01	0.03	0	0	0.51	0.72	0.34	0.08	0.95	2.74	0.08	0.91	0.63	0.2
cis_mRNA_overlap	0	Lnc-AntiOverlap-mRNA	LTCONS_00066383	MTCONS_00074210	chr12	89524869	89603134	14438	+	chr12	89419718	89526262	3158	-	*	0.8987	0.8636	0	0	0.01	0	0	0.06	0	0.02	0.01	0	0.25	0.27	0.34	0.09	0	1.09	0.08	0.64	0.69	0.13
cis_mRNA_overlap	0	Lnc-AntiOverlap-mRNA	LTCONS_00066383	XM_017019358.1	chr12	89524869	89603134	14438	+	chr12	89588049	89656019	6623	-	*	0.8545	0.687	0	0	0.01	0	0	0.06	0	0.02	0.01	0	0	0.11	0.09	0.03	0	0.68	0	0.13	0.34	0.27
cis_mRNA_up10k	64	NA	LTCONS_00066383	NM_003774.4	chr12	89524869	89603134	14438	+	chr12	89519412	89524806	5395	-	*	-0.6053	-0.8088	0	0	0.01	0	0	0.06	0	0.02	0.01	0	3.49	2.56	2.34	2.78	4.09	1.76	3.47	2.42	1.59	2.87
cis_mRNA_overlap	0	Lnc-AntiOverlap-mRNA	LTCONS_00066753	XM_011538349.2	chr12	95996491	96013000	2233	+	chr12	96011749	96035651	1628	-	*	0.7652	0.7842	0.05	0.02	0.39	0.33	0.49	0.05	0.37	0.01	0	0.91	0.18	0.09	0.58	0.55	0.46	0.13	0.19	0	0.16	0.51
cis_mRNA_up10k	127	NA	LTCONS_00066753	MTCONS_00074565	chr12	95996491	96013000	2233	+	chr12	95972662	95996365	5969	-	*	0.7133	0.7538	0.05	0.02	0.39	0.33	0.49	0.05	0.37	0.01	0	0.91	13.21	14.52	40.99	9.24	40.23	4.3	5.57	0.21	3.49	35.03
cis_mRNA_up10k	6106	NA	LTCONS_00066753	XM_017019246.1	chr12	95996491	96013000	2233	+	chr12	95972662	95990386	3234	-	*	0.8733	0.8754	0.05	0.02	0.39	0.33	0.49	0.05	0.37	0.01	0	0.91	4.07	3.67	7.16	5.44	10.91	1.32	2.74	0.1	1	11.72
tran	NA	NA	LTCONS_00066874	MTCONS_00093270	chr12	98501152	98501770	619	+	chr14	55366391	55411858	9690	-	-799.41	0.886	0.681	0	0.09	0.05	0.04	0.18	1.12	0.06	0.37	0	0	0.71	0.7	1.01	0.48	2.09	2.96	1.13	1.74	0.73	0.89
cis_mRNA_dw20k	2554	NA	LTCONS_00067047	NM_001319988.1	chr12	102200073	102206647	6575	+	chr12	102120171	102197520	3319	+	*	0.7891	0.6715	0.01	0.01	0.02	0.01	0.1	0.65	0.01	0.19	0.03	0.02	0	0	0.02	0	0	0.1	0	0.11	0	0
cis_mRNA_dw20k	2554	NA	LTCONS_00067047	NM_001319993.1	chr12	102200073	102206647	6575	+	chr12	102120171	102197520	3196	+	*	0.9788	0.8259	0.01	0.01	0.02	0.01	0.1	0.65	0.01	0.19	0.03	0.02	0	0	0	0	0.09	0.28	0	0.06	0	0
cis_mRNA_dw20k	2554	NA	LTCONS_00067047	XM_011538509.1	chr12	102200073	102206647	6575	+	chr12	102120171	102197520	2854	+	*	0.7896	0.6466	0.01	0.01	0.02	0.01	0.1	0.65	0.01	0.19	0.03	0.02	0	0.07	0	0.12	0.08	0.25	0	0.17	0.11	0.11
cis_mRNA_dw20k	2554	NA	LTCONS_00067047	XM_017019534.1	chr12	102200073	102206647	6575	+	chr12	102120171	102197520	2917	+	*	0.9194	0.682	0.01	0.01	0.02	0.01	0.1	0.65	0.01	0.19	0.03	0.02	0	0.08	0	0	0.43	0.8	0	0.38	0	0
cis_mRNA_dw20k	2554	NA	LTCONS_00067047	XM_017019543.1	chr12	102200073	102206647	6575	+	chr12	102120177	102197520	2583	+	*	0.9661	0.9046	0.01	0.01	0.02	0.01	0.1	0.65	0.01	0.19	0.03	0.02	0	0	0	0	0.17	0.69	0	0.04	0.03	0
cis_mRNA_dw20k	2554	NA	LTCONS_00067047	XM_017019544.1	chr12	102200073	102206647	6575	+	chr12	102120177	102197520	2504	+	*	0.943	0.743	0.01	0.01	0.02	0.01	0.1	0.65	0.01	0.19	0.03	0.02	0.1	0	0	0	0.08	0.88	0.01	0.53	0.16	0.06
cis_mRNA_dw20k	18430	NA	LTCONS_00067593	NM_001040107.1	chr12	110614027	110630257	2353	+	chr12	110648686	110689812	1736	-	*	0.6295	0.6157	0.14	0	0	0	0	0	0.25	0	0	0	0.26	0	0.18	0	0	0.44	0.44	0.17	0	0
cis_mRNA_overlap	0	Lnc-Overlap-mRNA	LTCONS_00067595	NM_001319682.1	chr12	110614027	110630257	2171	+	chr12	110614027	110630257	2180	+	-820.43	0.7383	0.6636	0	0	0.16	0	0	0.57	0	0.01	0	0	0.31	0.46	0.68	0.53	0.44	1.27	0.51	0.79	0.41	1.02
cis_mRNA_dw20k	1840	NA	LTCONS_00067690	NM_000690.3	chr12	111811824	111864201	4248	+	chr12	111766887	111809985	2060	+	*	0.9055	0.8545	1.18	0.97	2.28	2.01	0.68	0.56	2.24	0.5	0.52	2.8	230.66	96.23	284.82	281.01	84.37	97.04	187.05	66.94	104.94	337.77
cis_mRNA_up10k	8547	NA	LTCONS_00069244	XM_005266182.3	chr12	132956421	132977819	1156	+	chr12	132986365	133012568	3269	+	*	0.8004	0.7939	0.02	0.79	0.1	0.01	0	0.66	0.03	0.06	0.14	0.21	0.21	0.68	0.32	0.31	0.17	0.63	0	0.02	0.56	0.34
cis_mRNA_dw20k	2110	NA	LTCONS_00070155	MTCONS_00070166	chr12	9396529	9415609	5232	-	chr12	9417718	9419569	1297	-	*	0.9699	0.8293	0.02	0.1	0.07	0.01	0.12	0.47	0	0.13	0.01	0	0.32	0.59	0.44	0.11	0.45	2.52	0.3	1.04	0.49	0.24
cis_mRNA_overlap	0	Lnc-Overlap-mRNA	LTCONS_00070283	NM_003651.4	chr12	10699077	10723448	8829	-	chr12	10699077	10723354	1974	-	-1074.78	0.6414	0.697	1.23	0.14	1.01	0.82	0.58	0.31	1.02	0.18	0.47	0.27	1.72	0.94	1.04	1.06	1.84	0.37	1.31	0.66	1.16	0.24
cis_mRNA_overlap	0	Lnc-Overlap-mRNA	LTCONS_00070283	XM_011520871.2	chr12	10699077	10723448	8829	-	chr12	10710351	10723448	1348	-	-851.68	0.841	0.8146	1.23	0.14	1.01	0.82	0.58	0.31	1.02	0.18	0.47	0.27	0.46	0	0.67	0.57	0.22	0.06	0.75	0.09	0.53	0.06
cis_mRNA_dw20k	15702	NA	LTCONS_00070456	NM_016312.2	chr12	14736969	14770777	2609	-	chr12	14786478	14803467	2674	-	*	0.692	0.793	0	0.05	0	0	0.06	0.08	0.07	0.07	0.05	0	6.25	5.19	6.29	4.15	9.17	15.84	6.82	13.32	6.83	6.04
cis_mRNA_up10k	1217	NA	LTCONS_00070613	MTCONS_00062943	chr12	20807778	20809485	1708	-	chr12	20810701	20974601	60592	+	*	0.716	0.809	0	0	0	0	0	0	0.02	1.08	0	0.02	1.76	0.06	5.67	2.12	0.13	0.18	9.54	19.07	0.04	14.74
cis_mRNA_overlap	0	Lnc-AntiOverlap-mRNA	LTCONS_00070614	MTCONS_00062943	chr12	20809611	20817762	8152	-	chr12	20810701	20974601	60592	+	*	0.7099	0.809	0	0	0	0	0	0	0.01	0.89	0	0.01	1.76	0.06	5.67	2.12	0.13	0.18	9.54	19.07	0.04	14.74
cis_mRNA_overlap	0	Lnc-CompleteIn-mRNAIntron	LTCONS_00070755	NM_001261414.1	chr12	24077962	24093518	15557	-	chr12	23532297	24562449	4300	-	*	0.7137	0.8061	1.28	1.55	2.88	1.68	0.73	0.77	2.05	0.09	2.42	5.35	0.67	0.95	0.72	0.55	0.2	0.27	0.34	0	1.05	1
cis_mRNA_overlap	0	Lnc-CompleteIn-mRNAIntron	LTCONS_00070756	NM_001261414.1	chr12	24093637	24117574	23938	-	chr12	23532297	24562449	4300	-	*	0.6892	0.8061	1.18	1.45	2.96	1.5	0.68	0.69	1.93	0.06	2.15	5.35	0.67	0.95	0.72	0.55	0.2	0.27	0.34	0	1.05	1
cis_mRNA_overlap	0	Lnc-AntiOverlap-mRNA	LTCONS_00070931	NM_007211.4	chr12	25924172	25959766	3149	-	chr12	25959031	26079892	2318	+	*	0.7631	0.6972	0.06	0	0	0.06	0	0	0	0	0	0	0.04	0	0	0.11	0	0	0	0.04	0	0.04
cis_mRNA_overlap	0	Lnc-AntiOverlap-mRNA	LTCONS_00071145	XM_006719105.1	chr12	28061641	28190912	15188	-	chr12	28190474	28550166	2583	+	*	0.8976	0.7863	0	0.01	0.01	0	0	0.05	0.01	0	0.01	0	0.18	0.25	0.27	0.19	0.36	1.26	0.61	0	0.67	0
cis_mRNA_overlap	0	Lnc-AntiOverlap-mRNA	LTCONS_00071328	MTCONS_00063375	chr12	31020763	31073848	8662	-	chr12	31073574	31104799	4601	+	*	0.9311	0.6905	0.02	0	0	0.01	0.04	0.37	0.02	0.2	0.01	0.02	0.45	0.45	0.42	0.04	0.77	1.93	0.44	1.68	0.13	0.18
tran	21517658	NA	LTCONS_00071328	XM_011520903.2	chr12	31020763	31073848	8662	-	chr12	9448475	9503106	1252	+	-727.81	0.8972	0.6688	0.02	0	0	0.01	0.04	0.37	0.02	0.2	0.01	0.02	0.04	0.07	0.02	0.04	0.29	2.35	0	0.19	0.04	0.12
cis_mRNA_up10k	4025	NA	LTCONS_00071332	XM_011520597.2	chr12	31028676	31073848	23485	-	chr12	31077872	31100650	2387	+	*	0.731	0.7624	0	0	0	0	0.02	0	0.03	0.11	0	0	0.02	0.1	0.06	0	0.27	0.36	0.43	0.49	0	0
cis_mRNA_dw20k	18343	NA	LTCONS_00072143	MTCONS_00072145	chr12	50108156	50110964	596	-	chr12	50129306	50165943	2343	-	*	0.6532	0.6869	0	0.38	0.23	0.37	1.13	0.99	0.35	0.38	0.75	0.16	0.81	0.74	0.19	0.57	2.2	1.43	1.26	2.26	1.47	0.3
cis_mRNA_dw20k	18835	NA	LTCONS_00072143	XM_006719687.3	chr12	50108156	50110964	596	-	chr12	50129798	50167369	2134	-	*	0.6147	0.7043	0	0.38	0.23	0.37	1.13	0.99	0.35	0.38	0.75	0.16	0.8	0.32	0.22	0.32	0.82	1.45	0.3	0.99	0.87	0
cis_mRNA_dw20k	18835	NA	LTCONS_00072143	XM_011538975.2	chr12	50108156	50110964	596	-	chr12	50129798	50167369	2101	-	*	0.8003	0.6679	0	0.38	0.23	0.37	1.13	0.99	0.35	0.38	0.75	0.16	0.18	0.56	0	0	0.85	0.55	0	0	0.52	0
cis_mRNA_dw20k	7446	NA	LTCONS_00072143	NM_139071.2	chr12	50108156	50110964	596	-	chr12	50085200	50100711	3306	+	*	0.7627	0.6617	0	0.38	0.23	0.37	1.13	0.99	0.35	0.38	0.75	0.16	0.08	0	0	0	0.81	0.63	0.23	0.54	0.1	0
cis_mRNA_overlap	0	Lnc-AntiOverlap-mRNA	LTCONS_00072143	MTCONS_00064270	chr12	50108156	50110964	596	-	chr12	50103819	50120457	4486	+	*	-0.823	-0.8875	0	0.38	0.23	0.37	1.13	0.99	0.35	0.38	0.75	0.16	2.04	0.37	2.43	1.42	0.04	0.18	2.09	0.86	0.1	1.96
cis_mRNA_overlap	0	Lnc-AntiOverlap-mRNA	LTCONS_00072143	NM_005276.3	chr12	50108156	50110964	596	-	chr12	50103819	50111320	3083	+	*	-0.9205	-0.8024	0	0.38	0.23	0.37	1.13	0.99	0.35	0.38	0.75	0.16	40.04	30.01	43.56	41.83	5.3	3.23	42.56	26.21	12.95	39
tran	NA	NA	LTCONS_00072400	MTCONS_00263996	chr12	52948579	52949911	509	-	chr6	20099684	20212464	5646	-	-595.48	0.6104	0.6018	0.65	1.19	0.98	0.9	1.38	3.88	1.23	4.94	2.84	0.72	0.8	0.9	0.67	0.4	1.05	3.66	1.15	1.41	0.61	0.67
cis_mRNA_overlap	0	Lnc-CompleteIn-mRNAIntron	LTCONS_00072922	NM_015257.2	chr12	57066042	57067021	980	-	chr12	57055643	57078791	5398	-	*	0.9204	0.6464	0.41	0.65	0.88	0.37	1.52	4.91	0.79	3.74	0.56	1.26	0.12	0.24	0.08	0	0.45	1.56	0	0.6	0.08	0.04
cis_mRNA_overlap	0	Lnc-Overlap-mRNA	LTCONS_00072924	XM_017019077.1	chr12	57083312	57088703	2559	-	chr12	57055643	57087172	6068	-	*	0.8569	0.6934	0.07	0	0.01	0	0	0	0.07	0	0	0	0.22	0	0.06	0.04	0.03	0.14	0.26	0.13	0.03	0.04
cis_mRNA_overlap	0	mRNA-CompleteIn-LncExon	LTCONS_00072954	XM_005269033.2	chr12	57234903	57240755	2498	-	chr12	57234903	57240755	1161	-	-902.03	0.801	0.6228	0	0.06	0	0	0	0	0	0.08	0	0	0.62	2.98	0.47	0.63	4.07	1.91	0.29	34.82	2.43	0
cis_mRNA_up10k	321	NA	LTCONS_00073777	XM_017018848.1	chr12	75359364	75390941	1760	-	chr12	75391261	75432688	2599	+	*	0.7052	0.6169	0.38	0.41	0.36	0.11	1.06	1.14	0.27	0.43	0.86	0.64	0	0	0.04	0	0.04	0.11	0	0	0.15	0
cis_mRNA_dw20k	13308	NA	LTCONS_00074296	NM_001731.2	chr12	91974186	92126971	9517	-	chr12	92140278	92145897	4680	-	*	0.8934	0.9273	0.33	0.03	0.3	0.07	0	0.26	0.96	0.06	0.13	0.4	5.82	1.14	2.52	2.03	1.01	2.77	7.14	0.78	1.77	3.12
tran	NA	NA	LTCONS_00074749	XM_017003812.1	chr12	100156357	100198973	4420	-	chr2	71276548	71395754	5248	+	-2066.08	0.8001	0.7301	0.07	0.1	0.23	0	0.09	0.67	0.24	0.42	0	0	0.94	1.25	3.06	1.12	2.92	4.55	2.04	3.44	1.11	2.79
cis_mRNA_overlap	0	Lnc-Overlap-mRNA	LTCONS_00075193	NM_213596.2	chr12	109295835	109309700	13072	-	chr12	109277978	109309220	3352	-	*	0.9974	0.6537	0	0.01	0.03	0	0.04	1.1	0.03	0	0	0.02	0	0.04	0.05	0	0.02	0.93	0	0.01	0	0.06
cis_mRNA_dw20k	13190	NA	LTCONS_00076102	XM_017018853.1	chr12	121795259	121803906	3969	-	chr12	121712752	121782070	3016	+	*	0.7408	0.6806	0	0	0	0	0.08	0.05	0	0	0.01	0	0.17	0.09	0.24	0.08	0.64	1.38	0	0	0.2	0.34
cis_mRNA_overlap	0	mRNA-CompleteIn-LncExon	LTCONS_00076188	NM_023012.5	chr12	122504643	122527013	2538	-	chr12	122504643	122527013	2349	-	-893.49	-0.8264	-0.6228	0	0	0	0.03	0	0	0.27	0	0	0	2.98	1.54	3.33	1.59	3.53	2.59	0	2.69	2.92	2.94
tran	58270	NA	LTCONS_00077583	XM_003960991.5	chr12_KI270904v1_alt	229098	232923	3826	-	chr12_KI270904v1_alt	291192	294827	2947	-	-1170.31	0.7297	0.8788	0.43	0.34	0.53	0.22	1.13	1.99	0.66	1.5	0.78	0.82	0.26	0.11	0.64	0.12	0.68	0.72	0.46	1.02	0.34	0.87
tran	94815	NA	LTCONS_00077583	MTCONS_00077593	chr12_KI270904v1_alt	229098	232923	3826	-	chr12_KI270904v1_alt	327737	330294	2558	-	-1001.55	0.9064	0.8024	0.43	0.34	0.53	0.22	1.13	1.99	0.66	1.5	0.78	0.82	0.04	0.04	0.46	0.17	0.58	0.96	0.26	1	0.16	0.37
tran	NA	NA	LTCONS_00077583	NM_176884.2	chr12_KI270904v1_alt	229098	232923	3826	-	chr12	11091287	11092313	1027	-	-468.68	0.8952	0.8754	0.43	0.34	0.53	0.22	1.13	1.99	0.66	1.5	0.78	0.82	0.55	0.21	1.25	0.26	1.93	2.19	1.01	2.29	0.55	1.19
tran	NA	NA	LTCONS_00077583	NM_176886.2	chr12_KI270904v1_alt	229098	232923	3826	-	chr12_GL877876v1_alt	327525	328424	900	-	-427.4	0.7577	0.7333	0.43	0.34	0.53	0.22	1.13	1.99	0.66	1.5	0.78	0.82	0.53	0.22	0.93	0.26	0.92	1.3	1.28	1.66	0.73	0.52
tran	NA	NA	LTCONS_00077583	NM_176887.2	chr12_KI270904v1_alt	229098	232923	3826	-	chr12	11061365	11062294	930	-	-443.76	0.8872	0.8667	0.43	0.34	0.53	0.22	1.13	1.99	0.66	1.5	0.78	0.82	0.38	0.4	0.8	0.45	1.48	1.5	0.54	1.29	0.56	0.68
tran	NA	NA	LTCONS_00077583	NM_176890.2	chr12_KI270904v1_alt	229098	232923	3826	-	chr12	10985913	10986912	1000	-	-466.07	0.6258	0.7576	0.43	0.34	0.53	0.22	1.13	1.99	0.66	1.5	0.78	0.82	0.32	0.08	0.33	0.23	0.94	0.83	0.07	0.37	0.78	0.62
cis_mRNA_dw20k	1545	NA	LTCONS_00077591	MTCONS_00077593	chr12_KI270904v1_alt	325429	326193	765	-	chr12_KI270904v1_alt	327737	330294	2558	-	*	0.9881	0.9848	0.05	0.1	1.15	0.37	1.26	2.59	0.74	2.77	0.29	0.59	0.04	0.04	0.46	0.17	0.58	0.96	0.26	1	0.16	0.37
cis_mRNA_dw20k	236	NA	LTCONS_00077592	MTCONS_00077593	chr12_KI270904v1_alt	326397	327502	1106	-	chr12_KI270904v1_alt	327737	330294	2558	-	*	0.9723	0.936	0.36	0.34	0.71	0.36	1.48	2.25	0.76	2.36	0.39	0.69	0.04	0.04	0.46	0.17	0.58	0.96	0.26	1	0.16	0.37
cis_mRNA_up10k	5013	NA	LTCONS_00077594	MTCONS_00077593	chr12_KI270904v1_alt	335306	335596	291	-	chr12_KI270904v1_alt	327737	330294	2558	-	*	0.894	0.9179	0.29	0.65	1.44	0.45	3.21	3.5	2.8	5.03	1	1.24	0.04	0.04	0.46	0.17	0.58	0.96	0.26	1	0.16	0.37
cis_mRNA_overlap	0	Lnc-AntiOverlap-mRNA	LTCONS_00079402	MTCONS_00083579	chr13	51452367	51465020	3022	+	chr13	51408287	51453139	15355	-	*	0.7245	0.7006	0	0	0.05	0	0	0	0	0	0	0.23	1.25	0.51	3.24	0.74	1.44	2.57	2.79	3.04	0.57	4.72
cis_mRNA_overlap	0	Lnc-AntiCompleteIn-mRNAIntron	LTCONS_00079804	NM_020403.4	chr13	66909874	66932654	3549	+	chr13	66302834	67230336	6125	-	*	0.6043	0.705	0.04	0	0.19	0.31	0	0	0.22	0	0.23	2.1	0	0	0	0.14	0	0	0	0	0	0.1
cis_mRNA_overlap	0	Lnc-AntiCompleteIn-mRNAIntron	LTCONS_00079804	XM_017020620.1	chr13	66909874	66932654	3549	+	chr13	66895073	67230336	5870	-	*	0.6173	0.9191	0.04	0	0.19	0.31	0	0	0.22	0	0.23	2.1	0.09	0	0.14	0.12	0	0	0.1	0	0.1	0.16
cis_mRNA_overlap	0	Lnc-CompleteIn-mRNAIntron	LTCONS_00080635	NM_004466.5	chr13	92355204	92381092	25889	+	chr13	91398619	92867237	2945	+	*	0.972	0.9136	0.01	0	0.08	0.11	0.08	1.12	0.05	0.01	0.33	0.08	0	0.03	0.15	0.32	0.04	1.52	0.02	0	0.75	0.05
cis_mRNA_overlap	0	Lnc-CompleteIn-mRNAIntron	LTCONS_00080635	XM_017020435.1	chr13	92355204	92381092	25889	+	chr13	91398687	92751232	3190	+	*	0.9601	0.8216	0.01	0	0.08	0.11	0.08	1.12	0.05	0.01	0.33	0.08	0	0	0	0.02	0	0.06	0	0	0.02	0
cis_mRNA_overlap	0	Lnc-Overlap-mRNA	LTCONS_00081539	XM_005268331.1	chr13	113585629	113586397	557	+	chr13	113585278	113641473	2519	+	*	0.9918	0.7028	0.52	0.52	0.81	1.71	0.07	18.87	0.96	1.54	1.14	0.71	0	0	0	0.14	0	0.88	0	0	0	0
cis_mRNA_overlap	0	Lnc-Overlap-mRNA	LTCONS_00081539	XM_017020718.1	chr13	113585629	113586397	557	+	chr13	113584698	113641473	2524	+	*	0.9113	0.6991	0.52	0.52	0.81	1.71	0.07	18.87	0.96	1.54	1.14	0.71	0.98	0.27	1.88	1.15	0	4.79	1.46	1.33	0.36	0.23
cis_mRNA_up10k	7062	NA	LTCONS_00083200	NM_001286807.1	chr13	45425516	45431231	4937	-	chr13	45393316	45418455	3803	-	*	0.8016	0.7939	0.47	1.37	0.23	0.95	0.88	1.7	0.14	0.01	1.86	0.9	0.15	0.83	0	0.52	0.67	0.58	0.3	0.41	0.98	0.44
cis_mRNA_dw20k	3781	NA	LTCONS_00083858	XM_017020708.1	chr13	61402269	61405183	2915	-	chr13	61408963	61427266	6936	-	*	0.9072	0.8365	0	0.16	0	0.03	0.08	0	0	0	0.11	0.04	0	1.64	0.13	0.19	0.12	0.04	0.02	0	0.78	0.26
cis_mRNA_dw20k	4503	NA	LTCONS_00083858	NM_022843.3	chr13	61402269	61405183	2915	-	chr13	61409685	61415522	4778	-	*	0.9162	0.9245	0	0.16	0	0.03	0.08	0	0	0	0.11	0.04	0.05	24.97	0.85	1.88	2.83	0.11	0.32	0.03	11.11	1.43
cis_mRNA_dw20k	15446	NA	LTCONS_00084370	NM_001318538.1	chr13	80311346	80320531	9186	-	chr13	80335976	80339659	2602	-	*	0.6709	0.7441	0.1	0.01	0.21	0.05	0.26	0.03	0.22	0.09	0.02	0.84	0.16	0.07	0.18	0	0.14	0	0.39	0	0	0.31
cis_mRNA_dw20k	2127	NA	LTCONS_00084371	NM_001318538.1	chr13	80330728	80333850	3123	-	chr13	80335976	80339659	2602	-	*	0.7719	0.8122	0.16	0.01	0.23	0.09	0.26	0.07	0.31	0.08	0.01	0.73	0.16	0.07	0.18	0	0.14	0	0.39	0	0	0.31
cis_mRNA_overlap	0	Lnc-Overlap-mRNA	LTCONS_00086205	NM_001282192.1	chr14	20682839	20684434	1596	+	chr14	20684213	20700602	1898	+	*	0.6025	0.6809	0.53	0.15	0.21	0.3	0.06	0.06	0.29	0.1	0.13	0.14	9.01	5.53	9.52	8.92	5.24	1.58	7.13	0.49	5.75	9.61
cis_mRNA_up10k	4344	NA	LTCONS_00086205	NM_194431.2	chr14	20682839	20684434	1596	+	chr14	20688777	20700602	1346	+	*	0.675	0.7842	0.53	0.15	0.21	0.3	0.06	0.06	0.29	0.1	0.13	0.14	63.97	26.91	47.37	73.87	26.9	20.87	63.36	4.41	26.16	70.67
cis_mRNA_overlap	0	Lnc-AntiOverlap-mRNA	LTCONS_00086244	NM_001320329.1	chr14	21024172	21029900	1403	+	chr14	21016763	21024964	2890	-	*	0.876	0.9152	2.64	0.39	2.97	3.16	0.03	0.44	1.71	0.63	0.4	7.51	1.37	0.46	2.09	1.22	0	0.76	1.34	1.15	0.34	2.54
cis_mRNA_overlap	0	Lnc-AntiOverlap-mRNA	LTCONS_00086244	NM_016250.2	chr14	21024172	21029900	1403	+	chr14	21016763	21025776	2080	-	*	0.8677	0.7078	2.64	0.39	2.97	3.16	0.03	0.44	1.71	0.63	0.4	7.51	1.08	0	1.15	0.96	0.42	0	0	0.42	0.32	1.68
cis_mRNA_overlap	0	Lnc-AntiOverlap-mRNA	LTCONS_00086244	NM_201535.1	chr14	21024172	21029900	1403	+	chr14	21016763	21025776	2122	-	*	0.7578	0.8511	2.64	0.39	2.97	3.16	0.03	0.44	1.71	0.63	0.4	7.51	1.71	0.18	2.44	5.43	0.11	0	3.03	0.64	0	4.01
cis_mRNA_overlap	0	Lnc-AntiOverlap-mRNA	LTCONS_00086244	NM_201537.1	chr14	21024172	21029900	1403	+	chr14	21016763	21025776	2055	-	*	0.6229	0.766	2.64	0.39	2.97	3.16	0.03	0.44	1.71	0.63	0.4	7.51	2.18	0.18	4.76	4.45	0.09	0	1.74	0	0.52	2.47
cis_mRNA_overlap	0	Lnc-AntiOverlap-mRNA	LTCONS_00086244	NM_201538.1	chr14	21024172	21029900	1403	+	chr14	21016763	21025105	1990	-	*	0.8092	0.8182	2.64	0.39	2.97	3.16	0.03	0.44	1.71	0.63	0.4	7.51	3.19	1.56	4.8	3.82	0.58	0.1	2.28	0.75	1.09	4.31
cis_mRNA_overlap	0	Lnc-AntiOverlap-mRNA	LTCONS_00086244	NM_201540.1	chr14	21024172	21029900	1403	+	chr14	21016763	21025105	2099	-	*	0.761	0.8545	2.64	0.39	2.97	3.16	0.03	0.44	1.71	0.63	0.4	7.51	35.98	6.83	31.87	36.73	9.08	8.44	36.84	10.6	9.31	37.21
cis_mRNA_overlap	0	Lnc-AntiOverlap-mRNA	LTCONS_00086244	NM_201541.1	chr14	21024172	21029900	1403	+	chr14	21016763	21025105	2057	-	*	0.7388	0.9273	2.64	0.39	2.97	3.16	0.03	0.44	1.71	0.63	0.4	7.51	17.43	5.03	20.71	15.35	5.6	7.99	14.23	11.41	6.88	17.56
cis_mRNA_overlap	0	Lnc-AntiOverlap-mRNA	LTCONS_00086244	XM_011536997.1	chr14	21024172	21029900	1403	+	chr14	21016772	21025072	2101	-	*	0.8558	0.9019	2.64	0.39	2.97	3.16	0.03	0.44	1.71	0.63	0.4	7.51	0.4	0.08	0.51	0.65	0	0	0.52	0.31	0	0.77
cis_mRNA_overlap	0	Lnc-Overlap-mRNA	LTCONS_00086244	XM_017020966.1	chr14	21024172	21029900	1403	+	chr14	21024262	21032168	756	+	*	0.6509	0.8667	2.64	0.39	2.97	3.16	0.03	0.44	1.71	0.63	0.4	7.51	0.96	0.1	2.46	1.57	0.07	0	1.04	0.28	0.24	1.32
cis_mRNA_up10k	287	NA	LTCONS_00086244	NM_173846.4	chr14	21024172	21029900	1403	+	chr14	21030186	21032175	799	+	*	0.8995	0.61	2.64	0.39	2.97	3.16	0.03	0.44	1.71	0.63	0.4	7.51	0.1	0	0	0.24	0	0	0	0	0.1	0.78
cis_mRNA_dw20k	1604	NA	LTCONS_00086706	NM_001290257.1	chr14	24442945	24552209	3636	+	chr14	24429935	24441342	6168	+	*	0.7644	0.6626	0.3	0.62	0.19	0.3	0.39	0.96	0.13	0.52	0.33	0.42	5.4	4.89	2.3	1.07	3.87	7.78	3.31	4.16	4.54	4.58
cis_mRNA_up10k	170	NA	LTCONS_00086706	XM_011536975.1	chr14	24442945	24552209	3636	+	chr14	24439766	24442776	1275	-	*	0.8292	0.9174	0.3	0.62	0.19	0.3	0.39	0.96	0.13	0.52	0.33	0.42	0.07	0.42	0.2	0.07	0.41	0.74	0	0.75	0.24	0.42
cis_mRNA_dw20k	16671	NA	LTCONS_00087142	NM_003136.3	chr14	35046237	35050392	652	+	chr14	34982898	35029567	2281	+	*	-0.6132	-0.6201	0.79	3.75	0.5	2.07	5.55	0	0.52	1.74	3.06	0	20.5	20.97	20.19	18.41	13.16	26.1	25.11	33.75	17.24	27.11
cis_mRNA_overlap	0	Lnc-Overlap-mRNA	LTCONS_00087142	MTCONS_00087143	chr14	35046237	35050392	652	+	chr14	35046237	35113155	1627	+	-412.75	0.8231	0.7693	0.79	3.75	0.5	2.07	5.55	0	0.52	1.74	3.06	0	0.43	1.4	0.17	1.29	1.18	0.27	0.11	0.27	1.01	0.27
cis_mRNA_overlap	0	Lnc-Overlap-mRNA	LTCONS_00087261	MTCONS_00087264	chr14	37197888	37273300	4062	+	chr14	37197888	37424589	2624	+	-971.51	0.9121	0.811	0.04	0.14	0.05	0.09	0.28	0.49	0.1	0.39	0.13	0.19	0	0	0.09	0.18	0.35	0.54	0.18	0.46	0.16	0.33
cis_mRNA_overlap	0	Lnc-Overlap-mRNA	LTCONS_00087261	NM_001195296.1	chr14	37197888	37273300	4062	+	chr14	37197913	37551259	6273	+	*	0.7582	0.7175	0.04	0.14	0.05	0.09	0.28	0.49	0.1	0.39	0.13	0.19	0	0.12	0	0.04	0.13	0.12	0	0.13	0.03	0
cis_mRNA_overlap	0	Lnc-Overlap-mRNA	LTCONS_00087261	XM_017020994.1	chr14	37197888	37273300	4062	+	chr14	37197896	37524557	5269	+	*	0.8793	0.6403	0.04	0.14	0.05	0.09	0.28	0.49	0.1	0.39	0.13	0.19	0.04	0	0.16	0.08	0.16	0.65	0.13	0.37	0.04	0.22
cis_mRNA_dw20k	583	NA	LTCONS_00088393	NM_001530.3	chr14	61748841	61751193	2353	+	chr14	61695401	61748259	4059	+	*	0.7779	0.7234	0.37	0.1	0.25	0.07	0.08	0.29	0.79	0.08	0.03	0.28	16.63	9.99	15.27	9.23	15.75	20.42	29.61	22.33	8.54	16.01
cis_mRNA_overlap	0	Lnc-CompleteIn-mRNAIntron	LTCONS_00088714	NM_001321819.1	chr14	68119558	68195864	75607	+	chr14	67819779	68471676	2267	+	*	0.9435	0.8024	0.16	0.09	0.37	0.13	0.54	1.4	0.37	1.3	0.11	0.44	0.17	0.23	0.27	0.04	0.32	0.78	0.25	0.56	0.06	0.18
cis_mRNA_overlap	0	Lnc-CompleteIn-mRNAIntron	LTCONS_00088714	NM_133509.3	chr14	68119558	68195864	75607	+	chr14	67819779	68596021	2650	+	*	0.8833	0.6483	0.16	0.09	0.37	0.13	0.54	1.4	0.37	1.3	0.11	0.44	0.32	0.04	0.11	0.15	0.15	0.79	0.18	0.54	0.12	0.12
cis_mRNA_overlap	0	Lnc-CompleteIn-mRNAIntron	LTCONS_00088714	NM_133510.3	chr14	68119558	68195864	75607	+	chr14	67819779	68478093	1559	+	*	0.8492	0.7781	0.16	0.09	0.37	0.13	0.54	1.4	0.37	1.3	0.11	0.44	0.19	0.37	0.2	0.15	0.58	0.73	0.44	0.63	0.12	0.26
cis_mRNA_overlap	0	Lnc-CompleteIn-mRNAIntron	LTCONS_00088714	XM_017021545.1	chr14	68119558	68195864	75607	+	chr14	67819779	68504657	2508	+	*	0.9566	0.747	0.16	0.09	0.37	0.13	0.54	1.4	0.37	1.3	0.11	0.44	0.08	0.12	0.12	0.01	0.16	0.51	0.17	0.37	0.04	0.11
cis_mRNA_overlap	0	Lnc-CompleteIn-mRNAIntron	LTCONS_00088714	XM_017021548.1	chr14	68119558	68195864	75607	+	chr14	68095980	68612020	1979	+	*	0.9579	0.6994	0.16	0.09	0.37	0.13	0.54	1.4	0.37	1.3	0.11	0.44	0.06	0.02	0.07	0.07	0.08	0.39	0.06	0.36	0.09	0.09
cis_mRNA_dw20k	19167	NA	LTCONS_00088804	NM_006925.4	chr14	69791171	69818887	12948	+	chr14	69767087	69772005	1547	+	*	0.8877	0.7212	0.3	0.2	0.39	0.37	0.47	0.23	1.08	0.16	0.14	0.8	3.22	2.52	1.51	1.85	1.47	0.37	7.07	0.26	0.13	4.09
cis_mRNA_dw20k	571	NA	LTCONS_00089099	NM_001005745.1	chr14	73261723	73274640	6840	+	chr14	73275210	73458580	3467	-	*	0.9078	0.6121	0.36	0	0.22	0.14	0.18	3.71	0.06	4.7	0.08	0.05	3.27	2.39	4.09	2.88	3.4	5.64	3.45	5.54	3.06	3.56
cis_mRNA_overlap	0	Lnc-Overlap-mRNA	LTCONS_00089099	MTCONS_00089086	chr14	73261723	73274640	6840	+	chr14	73235842	73274640	6746	+	-4256.23	0.9964	0.8875	0.36	0	0.22	0.14	0.18	3.71	0.06	4.7	0.08	0.05	0.23	0	0.09	0.12	0.09	2.59	0.07	3.76	0.18	0.02
cis_mRNA_overlap	0	Lnc-Overlap-mRNA	LTCONS_00089099	MTCONS_00089090	chr14	73261723	73274640	6840	+	chr14	73237497	73274640	6893	+	-4352.97	0.9966	0.837	0.36	0	0.22	0.14	0.18	3.71	0.06	4.7	0.08	0.05	0.23	0.03	0.21	0	0.19	1.87	0	2.41	0.21	0
cis_mRNA_overlap	0	Lnc-Overlap-mRNA	LTCONS_00089099	XM_011537295.2	chr14	73261723	73274640	6840	+	chr14	73239758	73274629	5586	+	-3740.63	0.9782	0.6691	0.36	0	0.22	0.14	0.18	3.71	0.06	4.7	0.08	0.05	0.06	0	0	0.15	0.13	0.6	0.09	0.93	0	0
cis_mRNA_dw20k	2505	NA	LTCONS_00089455	MTCONS_00089453	chr14	77334101	77337477	3377	+	chr14	77324414	77331597	1247	+	*	0.7841	0.8537	0.28	0.15	0.3	0.54	0.12	0.15	0.38	0.16	0.18	1.02	15.29	0.23	8.79	48.47	0	1.2	14.01	1.97	0	32.54
cis_mRNA_dw20k	2507	NA	LTCONS_00089455	XM_011536671.2	chr14	77334101	77337477	3377	+	chr14	77324416	77331595	1117	+	*	0.6371	0.7477	0.28	0.15	0.3	0.54	0.12	0.15	0.38	0.16	0.18	1.02	0.76	1.08	0.31	4.86	0	0.16	1.13	0.4	0.1	2.34
cis_mRNA_dw20k	2507	NA	LTCONS_00089455	XM_017021243.1	chr14	77334101	77337477	3377	+	chr14	77324414	77331595	1604	+	*	0.7491	0.6707	0.28	0.15	0.3	0.54	0.12	0.15	0.38	0.16	0.18	1.02	0.15	0.06	0.11	1.06	0.17	0.03	0.41	0	0.17	0.69
cis_mRNA_up10k	9917	NA	LTCONS_00091374	XM_017021847.1	chr14	19313498	19319346	5849	-	chr14	19301336	19303582	2247	-	*	0.8835	0.9119	0.07	1.83	0.18	0.06	1.42	2.88	0.12	2	2.48	0.14	0	1.73	0.14	0.05	0.63	2.21	0	0.88	0.84	0.06
cis_mRNA_overlap	0	Lnc-Overlap-mRNA	LTCONS_00091843	NM_001276318.1	chr14	23295332	23300318	4492	-	chr14	23295921	23302848	4495	-	-2032.96	0.9113	0.8495	0.56	0.57	0.58	0.36	0.68	1.7	0.39	2.45	0.61	0.56	0	0.25	0	0	0.13	0.53	0	0.91	0.42	0
cis_mRNA_up10k	6445	NA	LTCONS_00091843	NM_001199864.1	chr14	23295332	23300318	4492	-	chr14	23306762	23326185	2130	+	*	0.6248	0.6869	0.56	0.57	0.58	0.36	0.68	1.7	0.39	2.45	0.61	0.56	3.23	2.66	2.57	1.72	2.98	4.97	2.97	4.13	4.3	1.02
cis_mRNA_up10k	9233	NA	LTCONS_00091843	NM_020834.2	chr14	23295332	23300318	4492	-	chr14	23273635	23286100	3741	-	*	0.8125	0.7927	0.56	0.57	0.58	0.36	0.68	1.7	0.39	2.45	0.61	0.56	1.13	1.22	1.39	1.15	1.44	4.19	0.96	2.75	1.44	1.51
tran	NA	NA	LTCONS_00091843	NM_002107.4	chr14	23295332	23300318	4492	-	chr1	226062707	226072002	1062	+	-731.01	0.7588	0.6687	0.56	0.57	0.58	0.36	0.68	1.7	0.39	2.45	0.61	0.56	84.91	80.7	62.05	70.76	113.07	88.05	75.75	134.84	76.84	68.67
cis_mRNA_overlap	0	mRNA-CompleteIn-LncExon	LTCONS_00092038	NM_014430.2	chr14	24305187	24311377	4525	-	chr14	24305187	24311370	2242	-	-1517.8	0.6778	0.8632	1.05	0.5	1.3	0.99	0.68	1.08	2.38	0.48	0.45	1.44	1.6	0.18	1.94	1.05	0.83	1.6	1.35	0	0.14	2.1
cis_mRNA_overlap	0	mRNA-CompleteIn-LncExon	LTCONS_00092038	XM_011536659.2	chr14	24305187	24311377	4525	-	chr14	24305187	24310993	1898	-	-1254.1	0.9642	0.8667	1.05	0.5	1.3	0.99	0.68	1.08	2.38	0.48	0.45	1.44	27.09	13.1	31.61	30.77	10.6	21.75	60.65	6.98	15.45	40.94
cis_mRNA_up10k	349	NA	LTCONS_00092344	MTCONS_00087069	chr14	32202993	32203262	270	-	chr14	32203610	32777654	10880	+	*	0.8234	0.6809	0.66	1.57	0.93	0.79	2.28	5.28	0.57	2.76	0.98	1.47	0.25	0.36	0.42	0.18	0.28	1.26	0.25	0.45	0.53	0.7
cis_mRNA_overlap	0	Lnc-AntiOverlap-mRNA	LTCONS_00092456	XM_005268024.2	chr14	34920217	34983127	19228	-	chr14	34982645	35029567	2363	+	*	0.6206	0.6884	0	0	0	0	0.01	0.05	0.04	0.01	0.01	0	0.77	0.51	1.1	0.92	1.54	1.87	1.14	1.52	0.98	1.22
cis_mRNA_overlap	0	Lnc-AntiOverlap-mRNA	LTCONS_00092456	XM_017021615.1	chr14	34920217	34983127	19228	-	chr14	34982973	35029567	2121	+	*	0.8957	0.7146	0	0	0	0	0.01	0.05	0.04	0.01	0.01	0	0.49	0.4	0.28	0.93	0.53	2.88	1.51	1.16	0.37	0.35
cis_mRNA_overlap	0	Lnc-AntiOverlap-mRNA	LTCONS_00092476	XM_017021615.1	chr14	34934368	34983127	30502	-	chr14	34982973	35029567	2121	+	*	0.8432	0.6742	0	0	0	0.01	0	0.02	0	0.01	0	0	0.49	0.4	0.28	0.93	0.53	2.88	1.51	1.16	0.37	0.35
cis_mRNA_up10k	258	NA	LTCONS_00093812	XM_017020920.1	chr14	66441945	66507855	37026	-	chr14	66508112	67181804	3733	+	*	0.7888	0.737	0.02	0	0.19	0.06	0.1	0	0.16	0.15	0.06	0.2	0.1	0.07	0.65	0.44	0.13	0.1	0.6	0.53	0	0.38
cis_mRNA_up10k	80	NA	LTCONS_00093812	XM_017020926.1	chr14	66441945	66507855	37026	-	chr14	66507934	67181804	3861	+	*	0.831	0.8308	0.02	0	0.19	0.06	0.1	0	0.16	0.15	0.06	0.2	0	0	0.08	0	0	0	0.08	0.04	0	0.04
cis_mRNA_dw20k	13508	NA	LTCONS_00093919	XM_017021548.1	chr14	68625527	68685565	2598	-	chr14	68095980	68612020	1979	+	*	0.8022	0.7874	0	0	0	0	0.02	0.08	0	0.02	0.02	0	0.06	0.02	0.07	0.07	0.08	0.39	0.06	0.36	0.09	0.09
cis_mRNA_overlap	0	Lnc-CompleteIn-mRNAIntron	LTCONS_00094072	XM_005268151.3	chr14	70532227	70533173	947	-	chr14	70520817	70564742	13232	-	*	0.9904	0.9273	0.03	0.1	0.75	0.05	0.39	2.76	0.43	1.19	0.5	1.07	0.2	0.18	0.9	0.25	0.71	3.76	0.38	1.5	0.45	1.47
cis_mRNA_overlap	0	Lnc-AntiOverlap-mRNA	LTCONS_00094131	XM_017021200.1	chr14	71292724	71321936	2726	-	chr14	71320418	71741044	6109	+	*	0.9312	0.915	0	0	0	0	0.08	0	0	0.08	0.05	0.04	0	0	0	0	0.02	0	0	0.02	0.01	0
tran	NA	NA	LTCONS_00096574	MTCONS_00096008	chr14_KI270846v1_alt	913553	913868	233	-	chr14	105643185	106627669	1415	-	-194.78	0.9701	0.6386	35.08	0	2.35	1.98	0	0	2.24	0	0.22	4.13	8.52	0	2.14	0.17	0	0	0	0	0	0
tran	NA	NA	LTCONS_00096574	XM_011543804.2	chr14_KI270846v1_alt	913553	913868	233	-	chr15	21742069	21742916	765	-	-205.21	0.9407	0.8032	35.08	0	2.35	1.98	0	0	2.24	0	0.22	4.13	9.97	0.17	1.74	2.7	0	0	3.36	0	0	0.76
tran	NA	NA	LTCONS_00096574	XM_011546198.1	chr14_KI270846v1_alt	913553	913868	233	-	chr14_KI270726v1_random	41382	42173	710	+	-192.49	0.9322	0.7629	35.08	0	2.35	1.98	0	0	2.24	0	0.22	4.13	11.63	0.11	1.5	3.5	0.05	0.48	4.35	0	0.04	1.36
cis_mRNA_overlap	0	Lnc-CompleteIn-mRNAIntron	LTCONS_00096891	XM_017022806.1	chr15	24424309	24447967	4217	+	chr15	24325746	24542421	1513	+	*	0.7524	0.8112	0	0	0.04	0.01	0	0	0.11	0	0	0.08	0.08	0	0.18	0.07	0.02	0	0.12	0.02	0	0.25
cis_mRNA_overlap	0	Lnc-Overlap-mRNA	LTCONS_00096904	XM_017022805.1	chr15	24465856	24546384	1681	+	chr15	24465856	24542421	2050	+	*	0.6436	0.7429	0.17	0	0.1	0.05	0	0	0.06	0	0	0.14	0.22	0	0	0.18	0	0	0.12	0	0	0.06
cis_mRNA_overlap	0	Lnc-Overlap-mRNA	LTCONS_00096904	XM_017022806.1	chr15	24465856	24546384	1681	+	chr15	24325746	24542421	1513	+	*	0.7759	0.8732	0.17	0	0.1	0.05	0	0	0.06	0	0	0.14	0.08	0	0.18	0.07	0.02	0	0.12	0.02	0	0.25
cis_mRNA_dw20k	4750	NA	LTCONS_00096927	XM_017022805.1	chr15	24547170	24807919	1440	+	chr15	24465856	24542421	2050	+	*	0.8509	0.8653	0.08	0	0	0.18	0	0	0.1	0	0	0	0.22	0	0	0.18	0	0	0.12	0	0	0.06
cis_mRNA_overlap	0	Lnc-AntiOverlap-mRNA	LTCONS_00096997	MTCONS_00102106	chr15	25050632	25339259	17122	+	chr15	25337234	25426814	5813	-	*	0.7487	0.6537	0.01	0	0.02	0.01	0	0	0.03	0	0.01	0.1	0	0	0.24	0.11	0.06	0.16	0.18	0	0	0.31
cis_mRNA_up10k	259	NA	LTCONS_00098615	NM_001311175.1	chr15	51094963	51118694	22637	+	chr15	51056601	51094705	2005	-	*	0.8925	0.7474	0	0	0	0	0	0.12	0.01	0	0	0	0.43	0	0	0.3	0	1.41	0.66	0	0	0.07
cis_mRNA_overlap	0	Lnc-AntiOverlap-mRNA	LTCONS_00099087	NM_134261.2	chr15	60479161	60528973	9701	+	chr15	60488284	61229303	10828	-	*	-0.7508	-0.8458	0	0.09	0	0	0.02	0	0	0.11	0.07	0	0.38	0.05	0.3	0.45	0.12	0.26	0.14	0	0.14	0.19
cis_mRNA_up10k	2	NA	LTCONS_00099087	NM_001018089.2	chr15	60479161	60528973	9701	+	chr15	60419609	60479160	7064	-	*	-0.6018	-0.7003	0	0.09	0	0	0.02	0	0	0.11	0.07	0	0.14	0.03	0.03	0.1	0.09	0.2	0.03	0.02	0.02	0.17
cis_mRNA_up10k	30	NA	LTCONS_00099087	XM_011522010.1	chr15	60479161	60528973	9701	+	chr15	60421468	60479132	5108	-	*	-0.6715	-0.6964	0	0.09	0	0	0.02	0	0	0.11	0.07	0	0.4	0.18	0.36	0.13	0.04	0.53	0.45	0	0.16	0.52
cis_mRNA_up10k	50	NA	LTCONS_00099087	XM_005254662.1	chr15	60479161	60528973	9701	+	chr15	60421468	60479112	5227	-	*	0.705	0.6133	0	0.09	0	0	0.02	0	0	0.11	0.07	0	0	0.12	0	0	0	0	0	0.16	0	0.1
cis_mRNA_overlap	0	Lnc-AntiOverlap-mRNA	LTCONS_00099099	XM_011521879.2	chr15	60479161	60548552	10266	+	chr15	60488284	60512339	10626	-	*	0.8075	0.6068	0	0	0	0.02	0	0	0.04	0	0	0.02	0.06	0.15	0.42	0.21	0.16	0.35	0.88	0.22	0.09	0.53
cis_mRNA_overlap	0	Lnc-AntiOverlap-mRNA	LTCONS_00099099	XM_017022466.1	chr15	60479161	60548552	10266	+	chr15	60488284	60558995	12690	-	*	0.8834	0.809	0	0	0	0.02	0	0	0.04	0	0	0.02	1.19	0.5	2.4	3.2	2.92	1.87	6.89	2.51	2.25	5.84
cis_mRNA_dw20k	12253	NA	LTCONS_00101203	MTCONS_00101191	chr15	90966345	90988626	4001	+	chr15	90934620	90954093	3191	+	*	0.9236	0.7071	0.07	0	0.03	0.03	0.14	0.19	0	0	0.04	0.01	0	0	0	0	0.17	0.17	0	0	0	0
cis_mRNA_dw20k	12253	NA	LTCONS_00101203	XM_017022407.1	chr15	90966345	90988626	4001	+	chr15	90935269	90954093	3301	+	*	0.9408	0.7115	0.07	0	0.03	0.03	0.14	0.19	0	0	0.04	0.01	0	0	0	0	0.02	0.03	0	0	0	0
cis_mRNA_overlap	0	Lnc-AntiOverlap-mRNA	LTCONS_00101203	XM_017022714.1	chr15	90966345	90988626	4001	+	chr15	90966528	90994566	1933	-	*	0.7828	0.7345	0.07	0	0.03	0.03	0.14	0.19	0	0	0.04	0.01	0	0	0	0	0.07	0.87	0	0	0.19	0
tran	NA	NA	LTCONS_00101890	MTCONS_00226373	chr15	19847521	19871673	479	-	chr4	122923070	123319450	8112	+	-354.64	0.8806	0.9157	0.13	4.22	0	0	0	0	0	0	0.12	0	0.26	0.55	0.11	0	0	0	0	0	0.16	0
cis_mRNA_overlap	0	Lnc-CompleteIn-mRNAIntron	LTCONS_00103921	MTCONS_00103911	chr15	56146725	56147521	797	-	chr15	56087280	56243782	10788	-	*	0.7282	0.6687	0.26	0.03	0.52	0	0.17	0.34	0.41	0.31	0.03	1.35	0.32	0.23	0.45	0.2	0.37	0.38	0.17	0.33	0.11	0.51
cis_mRNA_up10k	1495	NA	LTCONS_00103969	XM_005254484.3	chr15	56735072	56737887	650	-	chr15	56642965	56733578	2346	-	*	0.8356	0.8179	0	0	0	0	0.11	0	0	0.11	0.55	0	0	0	0	0	0	0	0	0.09	0.11	0
cis_mRNA_up10k	137	NA	LTCONS_00103973	NM_003205.3	chr15	56886170	56918499	3312	-	chr15	56918635	57288518	4716	+	*	0.7852	0.7842	0.16	0.21	0.23	0.14	0.67	0.42	0.12	0.48	0.14	0.22	6.81	4.78	6.31	5.32	8.13	9.3	4.38	9.39	6.17	5.78
cis_mRNA_overlap	0	Lnc-AntiOverlap-mRNA	LTCONS_00104278	XM_017022765.1	chr15	63580939	63600902	19942	-	chr15	63527833	63594633	5740	+	*	0.78	0.845	0.09	0.12	0.1	0.05	0.4	1.15	0.33	0.29	0.18	0.34	0.03	0.12	0	0	0.18	0.37	0.27	0.32	0.08	0.19
cis_mRNA_dw20k	12892	NA	LTCONS_00104930	XM_011521848.1	chr15	72751367	72784267	7213	-	chr15	72686209	72738476	2473	+	*	-0.8061	-0.7508	0.62	0.74	1.04	0.73	0	0	0.8	0.32	0.18	0.57	0.12	0.29	0	0.36	0.64	0.71	0	0.19	0.4	0
cis_mRNA_overlap	0	mRNA-CompleteIn-LncExon	LTCONS_00104930	MTCONS_00104929	chr15	72751367	72784267	7213	-	chr15	72751367	72784267	7000	-	-3566.4	-0.6976	-0.7156	0.62	0.74	1.04	0.73	0	0	0.8	0.32	0.18	0.57	0.55	0.76	0.96	0	1.8	1.37	0	1.4	1.27	1.4
tran	1928476	NA	LTCONS_00105643	XM_011522305.2	chr15	82471325	82513995	3577	-	chr15	84442470	84468587	1567	+	-1137.8	0.6083	0.6139	0	0	0.06	0.18	0	0	0.19	0	0.09	0	0	0	0.02	0	0	0	0.04	0	0	0
cis_mRNA_dw20k	5405	NA	LTCONS_00105806	XM_017022393.1	chr15	84622015	84633988	3008	-	chr15	84600986	84616611	1060	+	*	-0.6435	-0.7112	0.22	0.07	0	0.06	0.05	0	0.11	0.09	0.06	0.22	0	0	0.07	0	0.09	0.18	0	0.08	0.06	0
cis_mRNA_dw20k	5406	NA	LTCONS_00105806	NM_001007072.1	chr15	84622015	84633988	3008	-	chr15	84601018	84616610	934	+	*	-0.8541	-0.7914	0.22	0.07	0	0.06	0.05	0	0.11	0.09	0.06	0.22	0.25	0.62	0.49	0.59	0.62	0.67	0.32	0.39	0.63	0.18
cis_mRNA_dw20k	2222	NA	LTCONS_00105871	MTCONS_00105882	chr15	85743856	85757105	2477	-	chr15	85759326	85794958	3813	-	*	0.9206	0.7581	0.06	0.02	0.14	0.11	0.05	0.02	0.34	0.07	0.01	0.05	0.34	0	0.13	0.12	0	0	4.06	0.51	0	0.14
cis_mRNA_dw20k	2222	NA	LTCONS_00105872	MTCONS_00105882	chr15	85743856	85757105	2477	-	chr15	85759326	85794958	3813	-	*	0.9206	0.7581	0.06	0.02	0.14	0.11	0.05	0.02	0.34	0.07	0.01	0.05	0.34	0	0.13	0.12	0	0	4.06	0.51	0	0.14
cis_mRNA_dw20k	76	NA	LTCONS_00106146	MTCONS_00101118	chr15	90603409	90717179	485	-	chr15	90529886	90603334	10116	+	*	-0.6243	-0.6626	0.25	0.64	0.08	0.16	0.18	0.42	0.05	0.31	0.38	0.03	0.38	0.22	0.81	0.22	0.72	0.75	1.22	0.5	0.19	0.82
cis_mRNA_overlap	0	Lnc-AntiOverlap-mRNA	LTCONS_00106146	XM_011521906.2	chr15	90603409	90717179	485	-	chr15	90529915	90645345	5123	+	*	-0.616	-0.7169	0.25	0.64	0.08	0.16	0.18	0.42	0.05	0.31	0.38	0.03	0	0	0.13	0	0.14	0	0.19	0	0	0.04
cis_mRNA_up10k	3286	NA	LTCONS_00106506	NM_021005.3	chr15	96088326	96327597	39405	-	chr15	96330882	96340263	5110	+	*	0.7386	0.7316	0	0	0.05	0.03	0.01	0.01	0.05	0.01	0	0.03	0.7	0.13	1.28	0.51	1.09	0.35	1.18	0.62	0.08	0.85
cis_mRNA_overlap	0	Lnc-CompleteIn-mRNAIntron	LTCONS_00106828	XM_017021984.1	chr15	100211464	100237822	26339	-	chr15	100054035	100339129	11543	-	*	0.9725	0.9694	0.1	0.15	0.68	0.15	0.66	0.73	0.34	4.48	0.14	0.66	0.16	0.22	0.71	0.24	0.5	0.88	0.49	2.3	0.22	0.76
cis_mRNA_overlap	0	Lnc-Overlap-mRNA	LTCONS_00106828	MTCONS_00106823	chr15	100211464	100237822	26339	-	chr15	99992125	100223720	6248	-	*	0.8286	0.7415	0.1	0.15	0.68	0.15	0.66	0.73	0.34	4.48	0.14	0.66	0.05	0	0.26	0.01	0.15	0.16	0	0.38	0.01	0.05
cis_mRNA_overlap	0	Lnc-Overlap-mRNA	LTCONS_00106828	XM_017021976.1	chr15	100211464	100237822	26339	-	chr15	99971439	100342005	6268	-	*	0.9709	0.7025	0.1	0.15	0.68	0.15	0.66	0.73	0.34	4.48	0.14	0.66	0.24	0.3	0.33	0.09	0.23	0.38	0.6	2.26	0.09	0.3
tran	NA	NA	LTCONS_00107292	NM_001144757.1	chr15_KI270905v1_alt	4892005	4912337	1870	+	chr15	32641669	32697097	1244	+	-589.45	0.7958	0.6748	0.46	1.87	0.6	0.41	0.23	2.84	0.12	0	0.55	1.11	0.74	0.74	0.77	0.95	0.32	2.04	0.09	0	0.96	0.45
cis_mRNA_dw20k	225	NA	LTCONS_00109440	XM_005255354.3	chr16	25178455	25190530	377	+	chr16	25111709	25178231	1160	+	*	0.7432	0.6935	0.05	0	0	0	0	3.19	0	0.12	0	0	1.36	0.73	1.03	0.65	1.7	4.76	1.28	4.01	2.17	1.2
cis_mRNA_dw20k	226	NA	LTCONS_00109440	NM_016309.2	chr16	25178455	25190530	377	+	chr16	25111726	25178230	1370	+	*	0.7127	0.6956	0.05	0	0	0	0	3.19	0	0.12	0	0	1.71	1.77	1.5	1.32	1.74	5.52	1.17	5.28	1.54	1.32
tran	NA	NA	LTCONS_00110175	MTCONS_00126726	chr16	31700590	31707756	2114	+	chr17	2689386	2711633	5227	-	-1492.42	0.775	0.8304	0.12	0	0.35	0.13	0	0.15	0.12	0	0	0	5	2.39	7.02	6.21	1.49	8.12	2.25	3	0.46	1.93
cis_mRNA_dw20k	19162	NA	LTCONS_00110463	XM_017023755.1	chr16	48355685	48362999	7167	+	chr16	48244300	48336524	2159	+	*	0.6899	0.6727	0.79	0.76	0.86	1.12	0.6	0.2	1.89	0.4	0.56	1.64	7.7	6.81	6.32	10.97	5.37	4.82	10.98	10.37	6.04	10.35
cis_mRNA_overlap	0	Lnc-Overlap-mRNA	LTCONS_00110463	MTCONS_00110458	chr16	48355685	48362999	7167	+	chr16	48244167	48362999	9118	+	*	0.8431	0.9152	0.79	0.76	0.86	1.12	0.6	0.2	1.89	0.4	0.56	1.64	9.24	11.35	12.88	10.7	9.1	2.84	15.22	7.03	8.42	11.96
cis_mRNA_overlap	0	Lnc-CompleteIn-mRNAIntron	LTCONS_00110630	NM_033119.4	chr16	50573919	50576677	2759	+	chr16	50548330	50640860	8716	+	*	0.9998	0.9294	0.08	0	0.09	0.02	0	0.02	0.21	17.09	0.01	0.19	0.27	0.02	0.24	0.11	0.02	0.05	0.32	13.47	0.03	0.11
cis_mRNA_overlap	0	Lnc-CompleteIn-mRNAIntron	LTCONS_00110630	XM_017023804.1	chr16	50573919	50576677	2759	+	chr16	50548396	50649249	18635	+	*	0.9998	0.8839	0.08	0	0.09	0.02	0	0.02	0.21	17.09	0.01	0.19	0.01	0	0.08	0.04	0	0	0.1	4.1	0	0.03
cis_mRNA_dw20k	10828	NA	LTCONS_00111035	MTCONS_00111026	chr16	56648185	56649651	574	+	chr16	56625673	56637358	780	+	*	0.8888	0.8091	0	16.08	0.38	0.62	0	0	1.47	0	0.4	8.07	0.28	3.43	1.03	0.7	0.26	0	0.76	0	0.44	0.69
cis_mRNA_dw20k	14200	NA	LTCONS_00111035	NM_176870.2	chr16	56648185	56649651	574	+	chr16	56632622	56633986	440	+	*	0.9662	0.9129	0	16.08	0.38	0.62	0	0	1.47	0	0.4	8.07	47.22	1036.46	83.84	91.67	1.42	3.73	147.02	0.48	10.42	273.98
cis_mRNA_dw20k	17085	NA	LTCONS_00111035	NM_005950.2	chr16	56648185	56649651	574	+	chr16	56666735	56668065	402	-	*	0.9132	0.7316	0	16.08	0.38	0.62	0	0	1.47	0	0.4	8.07	167.55	2449.88	70.43	40.68	2.71	0.62	144.13	3.11	7.25	207.85
cis_mRNA_dw20k	8099	NA	LTCONS_00111035	NM_005946.2	chr16	56648185	56649651	574	+	chr16	56638666	56640087	396	+	-225.59	0.913	0.7941	0	16.08	0.38	0.62	0	0	1.47	0	0.4	8.07	18.41	199.97	14.42	19.2	5.21	0.76	62.04	17.05	9.78	37.54
cis_mRNA_up10k	8293	NA	LTCONS_00111035	NM_001301272.1	chr16	56648185	56649651	574	+	chr16	56657943	56659303	483	+	*	0.9608	0.8467	0	16.08	0.38	0.62	0	0	1.47	0	0.4	8.07	0.43	17.38	2.85	1.97	0	0.26	3.63	0	0.22	5.28
cis_mRNA_up10k	8293	NA	LTCONS_00111035	NM_005949.3	chr16	56648185	56649651	574	+	chr16	56657943	56659303	441	+	*	0.9128	0.8754	0	16.08	0.38	0.62	0	0	1.47	0	0.4	8.07	54.88	416.9	90.03	63.78	0.76	6.68	216.21	2.12	14.89	211.59
cis_mRNA_dw20k	10844	NA	LTCONS_00111036	MTCONS_00111026	chr16	56648201	56649651	562	+	chr16	56625673	56637358	780	+	*	0.9285	0.7446	0.46	7.17	0.41	0.31	0.07	0	1.08	0	0	2.81	0.28	3.43	1.03	0.7	0.26	0	0.76	0	0.44	0.69
cis_mRNA_dw20k	14216	NA	LTCONS_00111036	NM_176870.2	chr16	56648201	56649651	562	+	chr16	56632622	56633986	440	+	*	0.9896	0.8896	0.46	7.17	0.41	0.31	0.07	0	1.08	0	0	2.81	47.22	1036.46	83.84	91.67	1.42	3.73	147.02	0.48	10.42	273.98
cis_mRNA_dw20k	17085	NA	LTCONS_00111036	NM_005950.2	chr16	56648201	56649651	562	+	chr16	56666735	56668065	402	-	*	0.9523	0.9265	0.46	7.17	0.41	0.31	0.07	0	1.08	0	0	2.81	167.55	2449.88	70.43	40.68	2.71	0.62	144.13	3.11	7.25	207.85
cis_mRNA_dw20k	8115	NA	LTCONS_00111036	NM_005946.2	chr16	56648201	56649651	562	+	chr16	56638666	56640087	396	+	-233.85	0.9561	0.8406	0.46	7.17	0.41	0.31	0.07	0	1.08	0	0	2.81	18.41	199.97	14.42	19.2	5.21	0.76	62.04	17.05	9.78	37.54
cis_mRNA_up10k	8293	NA	LTCONS_00111036	NM_001301272.1	chr16	56648201	56649651	562	+	chr16	56657943	56659303	483	+	*	0.9843	0.8923	0.46	7.17	0.41	0.31	0.07	0	1.08	0	0	2.81	0.43	17.38	2.85	1.97	0	0.26	3.63	0	0.22	5.28
cis_mRNA_up10k	8293	NA	LTCONS_00111036	NM_005949.3	chr16	56648201	56649651	562	+	chr16	56657943	56659303	441	+	*	0.9369	0.8651	0.46	7.17	0.41	0.31	0.07	0	1.08	0	0	2.81	54.88	416.9	90.03	63.78	0.76	6.68	216.21	2.12	14.89	211.59
cis_mRNA_dw20k	10532	NA	LTCONS_00113223	XM_017023182.1	chr16	89249820	89257088	6392	+	chr16	89267619	89427516	9745	-	*	0.7977	0.7094	0	0.01	0.01	0	0.07	0.06	0.07	0.15	0	0	0.2	0	0.3	0.28	0.3	0.07	0.65	0.85	0	0
cis_mRNA_dw20k	10532	NA	LTCONS_00113223	XM_017023185.1	chr16	89249820	89257088	6392	+	chr16	89267619	89329374	9119	-	*	0.8724	0.6913	0	0.01	0.01	0	0.07	0.06	0.07	0.15	0	0	0.05	0	0	0	0.07	0	0.06	0.27	0	0
cis_mRNA_dw20k	11583	NA	LTCONS_00113223	XM_011523057.2	chr16	89249820	89257088	6392	+	chr16	89268670	89490544	10172	-	*	0.6986	0.6079	0	0.01	0.01	0	0.07	0.06	0.07	0.15	0	0	0.12	0.03	0.17	0.07	0.09	0.15	0.51	0.39	0.09	0.07
cis_mRNA_dw20k	19130	NA	LTCONS_00113783	NM_001037125.3	chr16	1373734	1379176	5113	-	chr16	1398305	1414720	1400	-	*	0.677	0.6018	0.05	0.12	0.19	0.05	0.73	0.99	0.16	1.1	0.06	0.15	0.07	0.1	0.09	0.13	0.46	0.55	0.81	0.78	0.23	0.08
cis_mRNA_overlap	0	Lnc-CompleteIn-mRNAIntron	LTCONS_00113783	MTCONS_00113771	chr16	1373734	1379176	5113	-	chr16	1362753	1414749	5793	-	*	0.883	0.9024	0.05	0.12	0.19	0.05	0.73	0.99	0.16	1.1	0.06	0.15	0	0.23	0.22	0	0.33	0.36	0.13	0.39	0.1	0.09
cis_mRNA_overlap	0	Lnc-CompleteIn-mRNAIntron	LTCONS_00113783	NM_001276414.1	chr16	1373734	1379176	5113	-	chr16	1363205	1379683	4320	-	*	0.8082	0.677	0.05	0.12	0.19	0.05	0.73	0.99	0.16	1.1	0.06	0.15	0	0.11	0.47	0.14	0.56	0.49	0	0.55	0.18	0
cis_mRNA_overlap	0	Lnc-Overlap-mRNA	LTCONS_00113783	XM_017023569.1	chr16	1373734	1379176	5113	-	chr16	1363205	1379176	4236	-	*	0.7375	0.642	0.05	0.12	0.19	0.05	0.73	0.99	0.16	1.1	0.06	0.15	0	0	0	0	0.62	0.06	0.17	0.94	0.13	0
cis_mRNA_overlap	0	Lnc-AntiOverlap-mRNA	LTCONS_00114081	XM_011522605.2	chr16	3049236	3059379	4649	-	chr16	3055250	3060729	2748	+	*	0.8124	0.7847	0.02	0.01	0.05	0.03	0.29	0.33	0.05	0.18	0	0.2	0	0	0	0.09	0.15	0.23	0	0.04	0	0.26
cis_mRNA_up10k	5934	NA	LTCONS_00114081	NM_001012718.1	chr16	3049236	3059379	4649	-	chr16	3065312	3069667	1093	+	*	0.8507	0.7903	0.02	0.01	0.05	0.03	0.29	0.33	0.05	0.18	0	0.2	5.54	9.2	7.64	3.77	24.45	14.59	9.18	12.3	5.98	14.31
cis_mRNA_up10k	5934	NA	LTCONS_00114081	NM_004221.4	chr16	3049236	3059379	4649	-	chr16	3065312	3069667	1090	+	*	0.8629	0.693	0.02	0.01	0.05	0.03	0.29	0.33	0.05	0.18	0	0.2	12.69	7.6	16.22	2.13	45.66	40.87	20.9	28.51	17.97	17.22
cis_mRNA_up10k	6233	NA	LTCONS_00114081	NM_001012635.1	chr16	3049236	3059379	4649	-	chr16	3065611	3069667	892	+	*	0.6221	0.6261	0.02	0.01	0.05	0.03	0.29	0.33	0.05	0.18	0	0.2	1.33	2.55	1.89	0.14	5.65	3.07	4.11	3.63	1.93	2.66
cis_mRNA_overlap	0	Lnc-AntiOverlap-mRNA	LTCONS_00114086	XM_017023561.1	chr16	3050373	3059379	4097	-	chr16	3045963	3055952	1822	+	*	0.9419	0.9753	0	0	0	0.03	0	0	0.04	0	0	0	0	0	0	0.07	0	0	0.05	0	0	0
cis_mRNA_overlap	0	Lnc-CompleteIn-mRNAIntron	LTCONS_00114408	XM_006720902.3	chr16	4906190	4906518	329	-	chr16	4882512	4936912	6197	-	*	0.833	0.6228	0.56	0.24	0.41	0.39	1.57	7.1	2.45	4.08	0.12	0.45	0	0	0	0	0	1.1	0.01	0	0	0
tran	NA	NA	LTCONS_00114408	MTCONS_00047677	chr16	4906190	4906518	329	-	chr11	33039417	33079454	8989	+	-605.34	0.7045	0.8074	0.56	0.24	0.41	0.39	1.57	7.1	2.45	4.08	0.12	0.45	0.13	0.04	0.09	0.05	0.04	0.16	0.16	0.24	0.03	0.05
tran	NA	NA	LTCONS_00114408	MTCONS_00263996	chr16	4906190	4906518	329	-	chr6	20099684	20212464	5646	-	-594.94	0.9437	0.8511	0.56	0.24	0.41	0.39	1.57	7.1	2.45	4.08	0.12	0.45	0.8	0.9	0.67	0.4	1.05	3.66	1.15	1.41	0.61	0.67
cis_mRNA_overlap	0	Lnc-AntiOverlap-mRNA	LTCONS_00114551	MTCONS_00108475	chr16	10479492	10487660	8169	-	chr16	10386055	10483640	3805	+	-4366.24	-0.6552	-0.7538	0.08	0.1	0.5	0.19	2.1	0.9	0.31	0.3	0.49	0.52	0.41	0.41	0.1	0.5	0	0.03	0.27	0.02	0.29	0.17
cis_mRNA_dw20k	4825	NA	LTCONS_00114552	MTCONS_00108475	chr16	10488464	10495992	7529	-	chr16	10386055	10483640	3805	+	*	-0.6176	-0.7195	0.09	0.09	0.4	0.3	2.25	0.91	0.33	0.32	0.51	0.7	0.41	0.41	0.1	0.5	0	0.03	0.27	0.02	0.29	0.17
cis_mRNA_dw20k	19258	NA	LTCONS_00114554	XM_006720864.3	chr16	10506927	10509320	2394	-	chr16	10528577	10559155	5054	-	*	0.8003	0.7091	0.03	0.09	0.34	0.24	1.3	0.83	0.18	0.16	0.3	0.33	7.12	8.77	7.56	8.49	11.85	11.39	7.83	5.74	8.85	10.49
cis_mRNA_dw20k	4943	NA	LTCONS_00114987	MTCONS_00114989	chr16	18383069	18384511	1316	-	chr16	18389453	18392888	1530	-	*	0.7501	0.6322	1.06	0.93	2.27	0.96	4	4.56	2.18	8.45	1	1.73	0.13	0.38	0.28	0.16	0.92	0.92	0.36	0.72	0.07	0.29
cis_mRNA_up10k	2094	NA	LTCONS_00114987	MTCONS_00114981	chr16	18383069	18384511	1316	-	chr16	18358075	18380976	3779	-	*	0.9409	0.697	1.06	0.93	2.27	0.96	4	4.56	2.18	8.45	1	1.73	0.92	1.14	1.44	0.97	4.55	5.68	1.87	7.39	2.29	0.86
cis_mRNA_up10k	2094	NA	LTCONS_00114987	MTCONS_00114982	chr16	18383069	18384511	1316	-	chr16	18358075	18380976	3490	-	*	0.9175	0.6121	1.06	0.93	2.27	0.96	4	4.56	2.18	8.45	1	1.73	0.14	1	1.25	0.74	2.45	5.24	0.7	5.92	0.71	0.11
cis_mRNA_up10k	3470	NA	LTCONS_00114987	MTCONS_00114980	chr16	18383069	18384511	1316	-	chr16	18358075	18379600	2376	-	*	0.7573	0.7455	1.06	0.93	2.27	0.96	4	4.56	2.18	8.45	1	1.73	0.83	0.61	0.81	0	0.9	3.09	1.76	2.61	1.01	0.66
cis_mRNA_dw20k	5740	NA	LTCONS_00115196	MTCONS_00115202	chr16	21439745	21441774	2030	-	chr16	21447513	21465052	3811	-	*	0.9848	0.8398	0	0	0	0	0	0.54	0.5	2.46	0.08	0	0.49	0.74	1.76	1.08	0.43	2.31	2.13	9.99	1.21	0
cis_mRNA_up10k	6429	NA	LTCONS_00115693	NM_005115.4	chr16	29813651	29813966	316	-	chr16	29820394	29848039	2884	+	*	0.7681	0.8467	0	0.39	0	0	0.16	0	0	0.32	0.74	0	14.53	34.27	8.11	3.86	19.46	0	19.45	30.62	28.55	8.74
cis_mRNA_up10k	6429	NA	LTCONS_00115693	NM_017458.3	chr16	29813651	29813966	316	-	chr16	29820394	29848039	2925	+	*	0.6684	0.8193	0	0.39	0	0	0.16	0	0	0.32	0.74	0	6.56	7.35	3.64	2.3	8.76	5.08	5.26	12.57	9.15	3.03
cis_mRNA_overlap	0	Lnc-CompleteIn-mRNAIntron	LTCONS_00115796	MTCONS_00115790	chr16	30310969	30311411	443	-	chr16	30265151	30335375	11881	-	*	0.9638	0.8667	1.16	1.9	3.57	0.97	5.63	7.76	4.54	20.4	0.79	2.63	0.73	0.18	2.15	0.76	3.29	3.04	2.67	8.29	0.41	2.71
cis_mRNA_up10k	4194	NA	LTCONS_00117017	XM_017023964.1	chr16	66490475	66495283	4809	-	chr16	66483055	66486282	3228	-	*	0.9662	0.9879	0.14	0.11	0.72	0.25	0.2	0.06	0.47	0.28	0.12	0.43	0.1	0.05	0.92	0.29	0.2	0.03	0.41	0.38	0.07	0.37
cis_mRNA_overlap	0	Lnc-AntiOverlap-mRNA	LTCONS_00117528	MTCONS_00112165	chr16	72014046	72043118	10697	-	chr16	72008744	72027659	6879	+	*	0.6326	0.7173	0.92	0.92	0.95	0.98	0.09	0.38	1.49	0.15	0.62	3.48	1.14	0.82	1.26	0.64	0.41	0.44	1.7	1.23	0.45	1.57
cis_mRNA_overlap	0	Lnc-AntiOverlap-mRNA	LTCONS_00117528	MTCONS_00112166	chr16	72014046	72043118	10697	-	chr16	72008744	72027659	4481	+	*	0.631	0.8268	0.92	0.92	0.95	0.98	0.09	0.38	1.49	0.15	0.62	3.48	0.69	1.16	0.81	0.52	0.02	0.06	1.46	0	0.34	0.99
cis_mRNA_overlap	0	Lnc-AntiOverlap-mRNA	LTCONS_00117528	NM_001361.4	chr16	72014046	72043118	10697	-	chr16	72008744	72025417	2427	+	*	0.6635	0.845	0.92	0.92	0.95	0.98	0.09	0.38	1.49	0.15	0.62	3.48	10.63	5.56	10.39	8.03	2.44	2.84	14.54	5.65	3.94	11.62
cis_mRNA_overlap	0	Lnc-AntiOverlap-mRNA	LTCONS_00117528	XM_005255829.3	chr16	72014046	72043118	10697	-	chr16	72014451	72027659	4611	+	*	0.6228	0.7599	0.92	0.92	0.95	0.98	0.09	0.38	1.49	0.15	0.62	3.48	2.51	0.27	1.14	0.9	0.13	0	2.16	0.03	0.28	1.87
cis_mRNA_dw20k	96	NA	LTCONS_00118652	XM_011523055.2	chr16	89254590	89267530	1724	-	chr16	89267625	89490556	9671	-	*	-0.7003	-0.7477	0	0.08	0.02	0.03	0.07	0.06	0	0.09	0.03	0	0.13	0	0.15	0.05	0	0.08	0.31	0.08	0.05	0.15
cis_mRNA_overlap	0	Lnc-AntiOverlap-mRNA	LTCONS_00118748	XM_017023056.1	chr16	89898303	89923173	22259	-	chr16	89873583	89911384	2429	+	*	0.7081	0.7619	0	0.01	0	0	0.02	0.01	0.03	0.02	0.01	0	1.23	0.99	0.91	0.61	1.73	1.23	1.38	1.64	0.65	0.6
tran	1275717	NA	LTCONS_00119055	MTCONS_00119094	chr16_KI270853v1_alt	2035465	2036041	397	+	chr16_KI270853v1_alt	717615	759749	8187	-	-393.68	0.8547	0.6869	0.27	0.1	0	0.18	1.24	1.64	0	0.53	0.09	0.39	0.26	0.39	0.33	0.06	1.16	5.21	0.6	1.19	0	0.86
tran	35727	NA	LTCONS_00119055	MTCONS_00119054	chr16_KI270853v1_alt	2035465	2036041	397	+	chr16_KI270853v1_alt	1983009	1999739	3330	+	-366.56	0.9046	0.8293	0.27	0.1	0	0.18	1.24	1.64	0	0.53	0.09	0.39	0.79	0.88	0.67	0.38	1.54	2.95	0.67	1.62	0.2	0.9
tran	NA	NA	LTCONS_00119055	MTCONS_00108899	chr16_KI270853v1_alt	2035465	2036041	397	+	chr16	16317043	16349432	6570	+	-373	0.8777	0.6687	0.27	0.1	0	0.18	1.24	1.64	0	0.53	0.09	0.39	1.91	1.95	2.21	1.42	4.25	5.54	0.93	4.47	0.87	1.54
tran	NA	NA	LTCONS_00119055	MTCONS_00114983	chr16_KI270853v1_alt	2035465	2036041	397	+	chr16	18358075	18380976	3136	-	-353.85	0.8315	0.8624	0.27	0.1	0	0.18	1.24	1.64	0	0.53	0.09	0.39	0.62	0.08	0	0.08	0.57	2.72	0	0.39	0.09	1.08
tran	113931	NA	LTCONS_00119100	MTCONS_00119102	chr16_KI270853v1_alt	775434	776821	965	-	chr16_KI270853v1_alt	890751	953081	4276	-	-649.48	0.784	0.6121	1.27	1.47	2.73	0.14	9.85	0.98	1.44	3.67	0.29	0.06	3.51	4.72	10.46	2.98	39.3	27.56	13.86	29.18	7.14	7.78
cis_mRNA_overlap	0	Lnc-Overlap-mRNA	LTCONS_00119707	XM_011523945.2	chr17	6755411	6775647	4204	+	chr17	6756042	6775647	4013	+	-1606.89	0.9235	0.7754	4.5	1.63	1.77	0.67	1.75	0.65	1.49	0.56	0.1	1.86	4.05	0.9	0.33	0.08	0	0	0.78	0	0	1.36
cis_mRNA_overlap	0	Lnc-Overlap-mRNA	LTCONS_00119707	XM_011523949.2	chr17	6755411	6775647	4204	+	chr17	6756042	6760347	1889	+	*	0.8968	0.7455	4.5	1.63	1.77	0.67	1.75	0.65	1.49	0.56	0.1	1.86	5.69	2.38	2.75	1.08	3.21	2.25	3.36	2.87	0.56	3.52
cis_mRNA_overlap	0	Lnc-AntiOverlap-mRNA	LTCONS_00121033	MTCONS_00128414	chr17	21214331	21246589	23899	+	chr17	21197950	21214595	1688	-	*	0.6046	0.7471	0	0	0	0	0.02	0.02	0.01	0.07	0	0	1.11	1.6	0.8	0.77	1.48	2.14	1.37	1.8	1.21	1.03
cis_mRNA_overlap	0	Lnc-AntiOverlap-mRNA	LTCONS_00121036	MTCONS_00128414	chr17	21214331	21246589	12502	+	chr17	21197950	21214595	1688	-	*	0.8138	0.809	0	0.01	0	0	0	0.05	0	0.05	0	0	1.11	1.6	0.8	0.77	1.48	2.14	1.37	1.8	1.21	1.03
cis_mRNA_overlap	0	Lnc-AntiOverlap-mRNA	LTCONS_00121036	NM_003876.2	chr17	21214331	21246589	12502	+	chr17	21197950	21214595	1396	-	*	0.7649	0.7866	0	0.01	0	0	0	0.05	0	0.05	0	0	2.49	4.97	2.28	2.43	2.33	3.78	2.75	9.38	2.77	1.83
cis_mRNA_up10k	1171	NA	LTCONS_00121341	NM_001033561.1	chr17	28952660	29016713	4666	+	chr17	28905253	28951490	4475	-	*	0.6232	0.6055	0.01	0.01	0	0.04	0.13	0.1	0.02	0.12	0.02	0	0.42	0.08	0.14	0.31	0.69	0.06	0.56	1.42	0.29	0
cis_mRNA_up10k	1771	NA	LTCONS_00121341	XM_017024903.1	chr17	28952660	29016713	4666	+	chr17	28905250	28950890	4526	-	*	0.7502	0.6239	0.01	0.01	0	0.04	0.13	0.1	0.02	0.12	0.02	0	0.18	0.38	0.19	0.05	0.39	0.64	0.27	0.79	0.23	0.15
tran	1178411	NA	LTCONS_00121478	NM_015355.3	chr17	30708696	30758600	2213	+	chr17	31937010	32001045	4499	+	-1028.52	0.6825	0.7538	0.3	0.16	0.31	0.05	0.34	1.15	0.35	0.87	0.06	0.13	0.86	1.15	1.42	0.11	0.47	1.85	0.96	5.41	0.47	0.68
cis_mRNA_dw20k	5698	NA	LTCONS_00121503	XM_011524879.1	chr17	30734063	30776987	2573	+	chr17	30782684	30809986	3115	-	*	-0.6346	-0.6966	0.03	0.14	0	0.03	0	0.09	0	0.2	0.06	0.05	0.15	0.2	0.34	0.16	0.24	0.14	0.32	0	0.16	0
tran	NA	NA	LTCONS_00121922	NM_207007.3	chr17	36072866	36105621	1472	+	chr17_KI270909v1_alt	266611	268581	822	+	-452.44	0.9377	0.7152	0.61	0.23	0.22	0.04	0.04	0.04	0.24	0	0.09	0	4.85	1.75	0.45	0.63	0.17	0	2.35	0.54	0.17	0
cis_mRNA_overlap	0	Lnc-AntiCompleteIn-mRNAIntron	LTCONS_00122676	MTCONS_00129936	chr17	43125583	43153670	7648	+	chr17	43044295	43176658	7042	-	*	0.8931	0.6869	0.29	0.5	0.56	0.36	0.57	1.96	0.43	4.03	0.33	0.8	0.23	0.14	0	0.03	0.47	3.26	0.22	3.14	0	0.36
cis_mRNA_up10k	101	NA	LTCONS_00122676	NM_007300.3	chr17	43125583	43153670	7648	+	chr17	43044295	43125483	7270	-	*	0.8864	0.7531	0.29	0.5	0.56	0.36	0.57	1.96	0.43	4.03	0.33	0.8	0	0	0	0	0.08	0.22	0	0.23	0	0
cis_mRNA_up10k	133	NA	LTCONS_00122676	NM_007299.3	chr17	43125583	43153670	7648	+	chr17	43044295	43125451	3783	-	*	0.6066	0.9268	0.29	0.5	0.56	0.36	0.57	1.96	0.43	4.03	0.33	0.8	0	0.07	0.11	0	0.16	0.55	0.09	0.25	0.07	0.13
cis_mRNA_overlap	0	Lnc-AntiCompleteIn-mRNAIntron	LTCONS_00122680	MTCONS_00129936	chr17	43126954	43130989	4036	+	chr17	43044295	43176658	7042	-	*	0.8533	0.8146	0.3	0.43	0.23	0.22	0.35	1.58	0.45	4.1	0.28	0.73	0.23	0.14	0	0.03	0.47	3.26	0.22	3.14	0	0.36
cis_mRNA_up10k	1472	NA	LTCONS_00122680	NM_007300.3	chr17	43126954	43130989	4036	+	chr17	43044295	43125483	7270	-	*	0.8412	0.6338	0.3	0.43	0.23	0.22	0.35	1.58	0.45	4.1	0.28	0.73	0	0	0	0	0.08	0.22	0	0.23	0	0
cis_mRNA_dw20k	6578	NA	LTCONS_00123165	MTCONS_00130462	chr17	46312269	46312685	417	+	chr17	46319262	46579781	19158	-	*	0.8695	0.7697	0	0.16	1.67	0.61	1.74	2.02	0.38	3.03	0.39	1.03	0.39	0.86	1.29	0.29	2.87	1.4	0.69	4.09	0.54	0.82
cis_mRNA_overlap	0	Lnc-CompleteIn-mRNAIntron	LTCONS_00123165	XM_017025473.1	chr17	46312269	46312685	417	+	chr17	46248044	46339295	4182	+	*	0.8921	0.8511	0	0.16	1.67	0.61	1.74	2.02	0.38	3.03	0.39	1.03	0.02	0.16	0.54	0.16	0.57	0.33	0.32	0.75	0.05	0.31
cis_mRNA_dw20k	14510	NA	LTCONS_00123274	NM_152347.4	chr17	47455821	47457545	1725	+	chr17	47323961	47441312	3951	+	*	0.7574	0.8659	0.01	0	0.03	0.05	0.11	1.06	0.05	0.06	0.04	0.04	0.05	0.08	0.11	0.25	0.57	0.76	0.15	0.37	0.41	0.24
cis_mRNA_overlap	0	Lnc-CompleteIn-mRNAIntron	LTCONS_00123282	MTCONS_00123281	chr17	47607129	47610305	3177	+	chr17	47586840	47623276	4098	+	*	0.9523	0.845	0.29	0.17	0.96	0.22	2.54	2.38	1	3.82	0.33	1.24	0.87	1.82	1.82	1.18	7.11	6.4	2.34	9.62	2.99	2
cis_mRNA_overlap	0	Lnc-CompleteIn-mRNAIntron	LTCONS_00123282	XM_011525496.1	chr17	47607129	47610305	3177	+	chr17	47522950	47623276	4141	+	*	0.8474	0.6606	0.29	0.17	0.96	0.22	2.54	2.38	1	3.82	0.33	1.24	4.75	4.96	4.21	3.29	11.02	11	5.37	21.39	10.26	3.9
cis_mRNA_overlap	0	Lnc-AntiOverlap-mRNA	LTCONS_00124034	MTCONS_00131241	chr17	58517907	58542835	14943	+	chr17	58520250	58535796	1615	-	*	0.8667	0.789	0	0	0	0	0	0	0	0.04	0.02	0.02	0.19	0.87	0.5	0.65	0.65	0.31	0.93	2.01	2.14	1.35
cis_mRNA_overlap	0	Lnc-AntiOverlap-mRNA	LTCONS_00124041	NM_031272.4	chr17	58517907	58558878	5473	+	chr17	58556677	58692055	4808	-	*	0.7032	0.6325	0	0.09	0.03	0.04	0	0.12	0.06	0.03	0.08	0	0	0	0	0	0	0.04	0	0	0.01	0
cis_mRNA_overlap	0	Lnc-Overlap-mRNA	LTCONS_00124761	NM_001267727.1	chr17	68413623	68493670	795	+	chr17	68291495	68420859	2599	+	-599.34	0.722	0.655	0.24	0.81	0.53	0.2	0.65	1.46	0.56	1.03	0.64	0.81	0	0	0	0	0	0.36	0.24	0.47	0.08	0.13
cis_mRNA_overlap	0	mRNA-AntiCompleteIn-LncIntron	LTCONS_00127193	NM_001004333.4	chr17	6981962	7020343	4189	-	chr17	7012417	7014533	811	+	*	0.7288	0.6282	0	0	0	0	0.1	0.05	0	0.31	0.01	0	16.97	10.95	10.84	7.09	12.91	20.54	14.09	23.94	12.01	10.91
cis_mRNA_dw20k	8145	NA	LTCONS_00127736	XM_011524114.2	chr17	13482285	13486054	3770	-	chr17	13494198	13542066	4277	-	*	0.8368	0.896	0.04	0	0.04	0.03	0	0.01	0.03	0	0	0.06	0.03	0	0.22	0.1	0	0	0.22	0	0	0.52
cis_mRNA_overlap	0	mRNA-AntiCompleteIn-LncIntron	LTCONS_00128215	XM_011523857.2	chr17	19063775	19190245	544	-	chr17	19123195	19151562	7986	+	*	-0.6818	-0.6242	181.86	744.48	48.11	283.74	37.26	101.16	113.42	264.42	643.1	204.14	0.2	0.04	0.19	0.15	0.26	0.13	0.42	0.23	0.07	0.17
cis_mRNA_overlap	0	mRNA-AntiCompleteIn-LncIntron	LTCONS_00128216	XM_011523857.2	chr17	19063775	19190245	544	-	chr17	19123195	19151562	7986	+	*	-0.7168	-0.8061	269.65	5262.77	35.39	1263.39	26.47	127.38	1.95	283.88	3991.68	996.09	0.2	0.04	0.19	0.15	0.26	0.13	0.42	0.23	0.07	0.17
cis_mRNA_overlap	0	mRNA-AntiCompleteIn-LncIntron	LTCONS_00128221	XM_017024636.1	chr17	19112000	19190245	637	-	chr17	19127407	19156976	3797	+	*	0.9063	0.8598	135.59	31.7	13.32	24.2	0.53	26.92	403.58	146.94	4.17	10.94	0.05	0.03	0	0.05	0.01	0.04	0.11	0.07	0.02	0.02
cis_mRNA_up10k	105	NA	LTCONS_00128297	NM_018242.2	chr17	19515319	19533750	895	-	chr17	19533854	19579033	3279	+	*	0.9524	0.8774	0.08	0.51	0.52	0.43	0	0.11	0	1.67	0.54	0	19.62	51.03	33.32	29.83	16.27	19.16	17.21	84.74	48.7	27.25
tran	NA	NA	LTCONS_00128306	MTCONS_00117199	chr17	19580180	19581982	1803	-	chr16	67767784	67806652	3466	-	-1007.32	0.6862	0.6727	0.08	0.29	0.47	0.02	1.05	0.22	0.63	1.32	0.33	0.1	0.85	0.83	1.69	1.04	1.55	0.84	2.04	1.62	1.05	1.02
cis_mRNA_overlap	0	Lnc-CompleteIn-mRNAIntron	LTCONS_00128744	NM_001282130.1	chr17	29778536	29783866	5331	-	chr17	29673912	29930228	1009	-	*	0.7711	0.7401	0.16	0.11	0.34	0.07	1.22	1.14	0.73	1.3	0.07	0.4	0	0.07	0.28	0	0.49	0.38	0.14	0.18	0	0
cis_mRNA_overlap	0	Lnc-CompleteIn-mRNAIntron	LTCONS_00128745	NM_001282130.1	chr17	29784405	29792810	8406	-	chr17	29673912	29930228	1009	-	*	0.7656	0.7244	0.16	0.16	0.55	0.17	1.68	1.3	0.76	1.77	0.13	0.64	0	0.07	0.28	0	0.49	0.38	0.14	0.18	0	0
cis_mRNA_overlap	0	Lnc-CompleteIn-mRNAIntron	LTCONS_00128746	NM_001282130.1	chr17	29833962	29895292	61251	-	chr17	29673912	29930228	1009	-	*	0.6739	0.6941	0.15	0.14	0.66	0.12	1.6	1.49	0.77	2.23	0.09	0.88	0	0.07	0.28	0	0.49	0.38	0.14	0.18	0	0
tran	1801801	NA	LTCONS_00129138	XM_006722242.3	chr17	36175319	36176356	1038	-	chr17	37978156	37990691	5318	-	-825.2	0.9305	0.7939	0.14	0	0.98	0.19	0.6	1.67	1.09	3.26	0.51	0.38	0.27	0.5	0.81	0.1	0.6	0.8	0.52	2.8	0.36	0.4
tran	1801806	NA	LTCONS_00129138	XM_006722246.3	chr17	36175319	36176356	1038	-	chr17	37978161	37988274	2647	-	-829.89	0.9472	0.792	0.14	0	0.98	0.19	0.6	1.67	1.09	3.26	0.51	0.38	0	0	0	0	0	0.49	0.45	1.04	0.09	0
tran	1827783	NA	LTCONS_00129138	XM_017024010.1	chr17	36175319	36176356	1038	-	chr17	38004138	38011405	2855	+	-825.2	0.9239	0.7697	0.14	0	0.98	0.19	0.6	1.67	1.09	3.26	0.51	0.38	0.06	0.03	0.58	0.19	0.27	0.5	0.14	2.06	0.12	0.33
tran	79192	NA	LTCONS_00129138	XM_011524185.2	chr17	36175319	36176356	1038	-	chr17	36255547	36264601	2903	-	-824.81	0.871	0.6228	0.14	0	0.98	0.19	0.6	1.67	1.09	3.26	0.51	0.38	0	0	0	0	0	0	0.15	0.9	0	0
cis_mRNA_up10k	6250	NA	LTCONS_00129870	XM_017024352.1	chr17	42751289	42761278	5793	-	chr17	42700275	42745040	4274	-	*	0.7055	0.6585	0.05	0.02	0.07	0.09	0	0.11	0.03	0	0	0.06	0.24	0.12	0.29	0.19	0.11	0.33	0.05	0.21	0.12	0.22
cis_mRNA_dw20k	5089	NA	LTCONS_00130130	NM_001098833.1	chr17	44163475	44186717	13583	-	chr17	44191805	44198161	3593	-	*	0.9638	0.8659	0.02	0.1	0.07	0.03	0.03	0.12	0.05	0.32	0.1	0	3.04	5.09	3.37	2.35	2.22	4.97	3.58	8.15	4.12	2.57
cis_mRNA_dw20k	999	NA	LTCONS_00130130	XM_011525197.2	chr17	44163475	44186717	13583	-	chr17	44151051	44162477	1745	+	*	0.6331	0.77	0.02	0.1	0.07	0.03	0.03	0.12	0.05	0.32	0.1	0	0	0.03	0.03	0.08	0	0.19	0	0.13	0.04	0
cis_mRNA_up10k	480	NA	LTCONS_00130130	XM_011525209.2	chr17	44163475	44186717	13583	-	chr17	44187196	44191731	2003	+	*	0.6405	0.6403	0.02	0.1	0.07	0.03	0.03	0.12	0.05	0.32	0.1	0	0.87	1.77	1.2	0.13	0.29	1.18	0	1.74	1.75	0.65
cis_mRNA_up10k	487	NA	LTCONS_00130130	XM_011525208.2	chr17	44163475	44186717	13583	-	chr17	44187203	44191731	2027	+	*	0.9459	0.8354	0.02	0.1	0.07	0.03	0.03	0.12	0.05	0.32	0.1	0	0.51	0.55	0.5	0.46	0.33	0.89	0.86	2.33	0.58	0
cis_mRNA_up10k	490	NA	LTCONS_00130130	NM_177441.2	chr17	44163475	44186717	13583	-	chr17	44187206	44191731	2423	+	*	0.9516	0.7439	0.02	0.1	0.07	0.03	0.03	0.12	0.05	0.32	0.1	0	0.53	0.7	1.01	0.39	0.74	2.52	0	6.3	1.79	0.66
cis_mRNA_up10k	500	NA	LTCONS_00130130	XM_011525205.2	chr17	44163475	44186717	13583	-	chr17	44187216	44191731	2516	+	*	0.8941	0.7195	0.02	0.1	0.07	0.03	0.03	0.12	0.05	0.32	0.1	0	1.22	1.34	0.3	0.54	0.83	2.41	0.59	3.49	1.36	0.39
tran	675832	NA	LTCONS_00130526	XM_005257882.4	chr17	47015126	47017169	2044	-	chr17	46294110	46339295	7122	+	-1666.34	0.6065	0.6708	0.46	0.86	0.9	0.51	4.76	2.21	0.57	1.64	1.14	0.92	0	0	0.09	0.02	0.22	0.1	0.14	0.22	0.19	0
tran	NA	NA	LTCONS_00130526	MTCONS_00133865	chr17	47015126	47017169	2044	-	chr17_GL000258v2_alt	1497775	1542854	6452	+	-1666.49	0.934	0.7006	0.46	0.86	0.9	0.51	4.76	2.21	0.57	1.64	1.14	0.92	0	0	0	0	0.34	0.03	0	0	0	0
cis_mRNA_dw20k	17624	NA	LTCONS_00130589	NM_001195192.1	chr17	47448333	47492620	9095	-	chr17	47323961	47430710	3530	+	*	0.9105	0.772	0.26	0.44	1.34	0.34	4.54	2.48	0.78	2.59	0.81	1.6	0	0	0.46	0.19	1.41	0.38	0.35	0.6	0.16	0.12
cis_mRNA_dw20k	7022	NA	LTCONS_00130589	NM_152347.4	chr17	47448333	47492620	9095	-	chr17	47323961	47441312	3951	+	*	0.7166	0.7091	0.26	0.44	1.34	0.34	4.54	2.48	0.78	2.59	0.81	1.6	0.05	0.08	0.11	0.25	0.57	0.76	0.15	0.37	0.41	0.24
cis_mRNA_overlap	0	Lnc-AntiOverlap-mRNA	LTCONS_00130643	XM_006722023.2	chr17	47879472	47941411	14538	-	chr17	47896156	47932271	4704	+	*	0.7348	0.7728	0	0.03	0	0	0.02	0	0	0	0.01	0.01	0	0.04	0	0	0.09	0	0	0	0	0
cis_mRNA_overlap	0	mRNA-AntiCompleteIn-LncIntron	LTCONS_00130643	XM_006722026.2	chr17	47879472	47941411	14538	-	chr17	47896182	47932271	4791	+	*	-0.6911	-0.81	0	0.03	0	0	0.02	0	0	0	0.01	0.01	0.02	0	0.05	0.05	0	0.07	0.07	0.12	0	0.03
cis_mRNA_overlap	0	mRNA-AntiCompleteIn-LncIntron	LTCONS_00130644	XM_011525140.2	chr17	47879472	47941411	18262	-	chr17	47905042	47928812	4660	+	*	0.9057	0.6991	0	0	0.01	0.01	0.05	0.02	0.01	0.06	0	0.01	0.11	0	0.06	0	0.32	0.28	0.13	0.56	0.04	0
cis_mRNA_overlap	0	mRNA-AntiCompleteIn-LncIntron	LTCONS_00130644	XM_017024968.1	chr17	47879472	47941411	18262	-	chr17	47896246	47932271	4837	+	*	0.7084	0.7143	0	0	0.01	0.01	0.05	0.02	0.01	0.06	0	0.01	0	0	0	0	0.27	0	0	0.06	0	0
cis_mRNA_overlap	0	mRNA-AntiCompleteIn-LncIntron	LTCONS_00130644	XM_017024969.1	chr17	47879472	47941411	18262	-	chr17	47901664	47932271	5432	+	*	0.7205	0.6723	0	0	0.01	0.01	0.05	0.02	0.01	0.06	0	0.01	0.03	0.05	0.07	0	0.14	0.08	0.13	0.13	0	0
cis_mRNA_overlap	0	Lnc-AntiOverlap-mRNA	LTCONS_00130658	XM_006722023.2	chr17	47896980	47941411	2597	-	chr17	47896156	47932271	4704	+	*	0.8993	0.6426	0	0.09	0	0	0.83	0.08	0.05	0.21	0.03	0	0	0.04	0	0	0.09	0	0	0	0	0
cis_mRNA_overlap	0	Lnc-AntiOverlap-mRNA	LTCONS_00130658	XM_017024968.1	chr17	47896980	47941411	2597	-	chr17	47896246	47932271	4837	+	*	0.9913	0.7229	0	0.09	0	0	0.83	0.08	0.05	0.21	0.03	0	0	0	0	0	0.27	0	0	0.06	0	0
cis_mRNA_overlap	0	mRNA-AntiCompleteIn-LncIntron	LTCONS_00130658	XM_017024969.1	chr17	47896980	47941411	2597	-	chr17	47901664	47932271	5432	+	*	0.6179	0.7493	0	0.09	0	0	0.83	0.08	0.05	0.21	0.03	0	0.03	0.05	0.07	0	0.14	0.08	0.13	0.13	0	0
cis_mRNA_up10k	215	NA	LTCONS_00130658	XM_011524968.2	chr17	47896980	47941411	2597	-	chr17	47941625	47949308	3238	+	*	0.8582	0.7504	0	0.09	0	0	0.83	0.08	0.05	0.21	0.03	0	0.79	1.56	0.55	0.89	2.54	1.45	0.6	1.14	0.47	0.36
cis_mRNA_up10k	725	NA	LTCONS_00131105	XM_017025191.1	chr17	57077970	57085045	1064	-	chr17	57085769	57121340	3816	+	*	0.6798	0.8424	0.21	0.76	0.19	0.36	0.1	2.83	0.29	0.55	1.66	0.23	9.82	24.5	13.69	11.15	6.42	30.08	14.3	29.12	19.67	17.54
cis_mRNA_overlap	0	Lnc-CompleteIn-mRNAExon	LTCONS_00131294	NM_001100595.1	chr17	59109947	59155439	2795	-	chr17	59109947	59155439	2970	-	-1105.35	0.9771	0.6197	1.02	1.77	0.69	0.75	1.06	3.41	0.45	3.45	0.7	0.78	0.15	0.36	0.07	0.09	0.07	0.72	0.13	0.88	0.08	0.07
cis_mRNA_overlap	0	Lnc-CompleteIn-mRNAExon	LTCONS_00131294	NM_182620.3	chr17	59109947	59155439	2795	-	chr17	59109947	59155439	2972	-	-1070.29	0.7958	0.8667	1.02	1.77	0.69	0.75	1.06	3.41	0.45	3.45	0.7	0.78	2.85	5.32	2.11	2.43	3.5	4	2.59	5.95	3.09	2.8
cis_mRNA_up10k	3027	NA	LTCONS_00131294	NM_001320990.1	chr17	59109947	59155439	2795	-	chr17	58998200	59106921	4491	-	*	0.7597	0.8268	1.02	1.77	0.69	0.75	1.06	3.41	0.45	3.45	0.7	0.78	0.37	0.12	0	0.1	0.22	0.39	0.05	0.38	0.09	0
cis_mRNA_up10k	3027	NA	LTCONS_00131294	NM_015294.4	chr17	59109947	59155439	2795	-	chr17	58998200	59106921	4532	-	*	0.9642	0.8571	1.02	1.77	0.69	0.75	1.06	3.41	0.45	3.45	0.7	0.78	2.71	6.5	1.8	1.8	2.67	8.11	1.34	10.92	2.78	2.25
cis_mRNA_up10k	3195	NA	LTCONS_00131294	XM_011524831.1	chr17	59109947	59155439	2795	-	chr17	58987974	59106753	3304	-	*	0.6628	0.6228	1.02	1.77	0.69	0.75	1.06	3.41	0.45	3.45	0.7	0.78	0	0.26	0	0	0	0	0	0.69	0	0
cis_mRNA_up10k	61	NA	LTCONS_00131294	NM_018304.3	chr17	59109947	59155439	2795	-	chr17	59155499	59206709	6473	+	*	0.9276	0.7416	1.02	1.77	0.69	0.75	1.06	3.41	0.45	3.45	0.7	0.78	0.29	0.4	0.23	0.18	0.73	3.51	0.24	2.28	0.18	0.17
cis_mRNA_dw20k	1244	NA	LTCONS_00131697	XM_006721651.2	chr17	64477785	64488904	2534	-	chr17	64490147	64497019	1551	-	*	0.9116	0.9273	0.5	1.06	0.54	0.44	1.11	1.91	1.12	2.56	0.94	0.58	0.35	0.77	0.6	0.26	0.96	1.32	1.17	1.85	0.74	0.98
cis_mRNA_overlap	0	Lnc-AntiOverlap-mRNA	LTCONS_00132299	NM_001006638.2	chr17	74729729	74737467	889	-	chr17	74737217	74747335	2652	+	*	0.7614	0.7212	0.06	0.54	0.28	0.25	0	0.3	0.21	0.12	1.13	0.22	2.42	4	1.09	1.98	0.15	4.81	1.58	0.62	5.25	2.36
cis_mRNA_overlap	0	Lnc-AntiOverlap-mRNA	LTCONS_00132299	NM_001163989.1	chr17	74729729	74737467	889	-	chr17	74736820	74747335	2801	+	*	0.8522	0.7234	0.06	0.54	0.28	0.25	0	0.3	0.21	0.12	1.13	0.22	0.4	1.36	0.63	0.45	0	0.14	0.3	0	1.4	0.35
cis_mRNA_dw20k	1175	NA	LTCONS_00132880	NM_003655.2	chr17	79827605	79831982	4378	-	chr17	79833156	79839414	2649	-	*	0.6574	0.6319	0.04	0.04	0.02	0	0.16	0.82	0.1	0.54	0.08	0.04	2.47	3.62	2.61	1.01	2.91	6.36	1.61	19.02	1.74	1.44
cis_mRNA_dw20k	14181	NA	LTCONS_00133166	MTCONS_00133173	chr17	81665036	81666637	1041	-	chr17	81680817	81683924	1584	-	*	0.7751	0.7818	0.44	1.39	0.51	0.07	0.11	1.5	0.08	2.86	1.46	0.68	1.72	3.31	2.02	1.45	1.19	4.89	1.42	3.76	2.22	1.28
cis_mRNA_dw20k	14558	NA	LTCONS_00133166	NM_001040025.1	chr17	81665036	81666637	1041	-	chr17	81681194	81683924	1207	-	*	0.8616	0.8303	0.44	1.39	0.51	0.07	0.11	1.5	0.08	2.86	1.46	0.68	1.48	3.66	1.74	1.62	3.78	6.22	1.26	7.14	4.28	1.89
cis_mRNA_overlap	0	Lnc-CompleteIn-mRNAExon	LTCONS_00133166	NM_001304999.1	chr17	81665036	81666637	1041	-	chr17	81665036	81666637	1602	-	-898.53	0.9046	0.8303	0.44	1.39	0.51	0.07	0.11	1.5	0.08	2.86	1.46	0.68	1.46	4.73	0.8	1.44	1.45	3.71	1.13	6.31	2.14	1.5
cis_mRNA_up10k	95	NA	LTCONS_00133166	NM_199287.2	chr17	81665036	81666637	1041	-	chr17	81666731	81673907	2109	+	*	0.9049	0.7576	0.44	1.39	0.51	0.07	0.11	1.5	0.08	2.86	1.46	0.68	2.14	4.56	1.88	1.47	2.9	5.21	1.6	8.22	2.74	1.5
cis_mRNA_dw20k	17279	NA	LTCONS_00133179	NM_207368.4	chr17	81799842	81805083	2131	-	chr17	81822361	81833294	1285	-	*	-0.7312	-0.6565	0.27	0.16	0.41	0.29	0	0	0.17	0.34	0.09	0.32	9.47	21.14	8.26	9.54	19.11	34.2	4.42	15.4	25.14	5.74
cis_mRNA_overlap	0	Lnc-AntiOverlap-mRNA	LTCONS_00133179	NM_000160.4	chr17	81799842	81805083	2131	-	chr17	81804132	81814013	2053	+	*	0.7383	0.6079	0.27	0.16	0.41	0.29	0	0	0.17	0.34	0.09	0.32	9.23	15.97	15.65	10.78	0	0.33	13.31	11.07	9.84	13.4
cis_mRNA_dw20k	1298	NA	LTCONS_00133270	NM_024083.3	chr17	82018703	82022930	1004	-	chr17	81977550	82017406	1843	+	*	0.9802	0.6848	0.36	0.52	0.42	0.65	0.41	1.05	0	5.3	0.29	0.61	5.03	8.72	6.3	5.86	5.07	9.65	4.54	27.47	4.81	3.83
cis_mRNA_overlap	0	Lnc-Overlap-mRNA	LTCONS_00133270	XM_017024326.1	chr17	82018703	82022930	1004	-	chr17	82018703	82022930	1149	-	-800.72	0.8428	0.6687	0.36	0.52	0.42	0.65	0.41	1.05	0	5.3	0.29	0.61	0.11	1.2	0.43	0.38	0.07	1.65	0.55	2.74	0.33	1.2
cis_mRNA_up10k	373	NA	LTCONS_00133270	NM_144999.3	chr17	82018703	82022930	1004	-	chr17	82023302	82031151	2701	+	*	0.8792	0.9152	0.36	0.52	0.42	0.65	0.41	1.05	0	5.3	0.29	0.61	1.84	4.01	1.95	2.76	2.44	6.38	1.48	9.09	1.57	1.98
cis_mRNA_up10k	8727	NA	LTCONS_00133270	NM_001316307.1	chr17	82018703	82022930	1004	-	chr17	82031656	82034204	1064	+	*	0.7711	0.6364	0.36	0.52	0.42	0.65	0.41	1.05	0	5.3	0.29	0.61	0.46	0.44	1.14	0.55	0.51	2.27	0	2.55	0.86	0.83
cis_mRNA_overlap	0	Lnc-Overlap-mRNA	LTCONS_00133273	XM_017024327.1	chr17	82018703	82022930	1135	-	chr17	82018703	82022930	1021	-	-765.64	0.9046	0.6069	0.25	0	0	0	0.09	0	0	0.88	0.09	0	0.08	0	0	0.02	0	0	0.17	1.42	0.59	0
cis_mRNA_dw20k	1471	NA	LTCONS_00133387	XM_017025074.1	chr17	82440149	82441173	1025	-	chr17	82442643	82450829	2045	-	*	0.6092	0.6848	0.27	0.78	0.21	0.05	0.81	0.22	0.76	0.99	0.43	0.3	3.47	9.58	4.44	3.22	8.76	5.56	5.02	5.7	8.33	3.2
cis_mRNA_dw20k	1471	NA	LTCONS_00133387	XM_017025076.1	chr17	82440149	82441173	1025	-	chr17	82442643	82450776	2042	-	*	0.6865	0.6364	0.27	0.78	0.21	0.05	0.81	0.22	0.76	0.99	0.43	0.3	0.29	0.27	0.41	0	0.94	0.23	1.25	3.81	0.3	1.05
cis_mRNA_dw20k	1471	NA	LTCONS_00133387	XM_017025078.1	chr17	82440149	82441173	1025	-	chr17	82442643	82450829	2003	-	*	0.8096	0.809	0.27	0.78	0.21	0.05	0.81	0.22	0.76	0.99	0.43	0.3	0	0.44	0	0	0.44	0	0	0.85	0	0
cis_mRNA_overlap	0	Lnc-AntiOverlap-mRNA	LTCONS_00133387	MTCONS_00126277	chr17	82440149	82441173	1025	-	chr17	82418376	82442645	3304	+	*	-0.6224	-0.7191	0.27	0.78	0.21	0.05	0.81	0.22	0.76	0.99	0.43	0.3	0.23	0	0.25	0.45	0	0.02	0.09	0	0.37	0
cis_mRNA_overlap	0	Lnc-AntiOverlap-mRNA	LTCONS_00133387	XM_005256346.3	chr17	82440149	82441173	1025	-	chr17	82418678	82442645	1815	+	*	0.6198	0.6142	0.27	0.78	0.21	0.05	0.81	0.22	0.76	0.99	0.43	0.3	0	0.64	0	0	0.01	0.02	0	0.46	0.11	0
cis_mRNA_overlap	0	Lnc-CompleteIn-mRNAIntron	LTCONS_00133834	MTCONS_00133831	chr17_GL000258v2_alt	638553	643115	4563	+	chr17_GL000258v2_alt	594064	692662	2433	+	*	0.9315	0.9423	0.08	0.09	0.41	0.04	0.75	0.46	0.14	0.89	0.14	0.31	0.57	0.28	2.12	0.51	3.13	2.57	1.96	5.1	0.62	0.97
cis_mRNA_overlap	0	Lnc-CompleteIn-mRNAIntron	LTCONS_00133834	MTCONS_00133832	chr17_GL000258v2_alt	638553	643115	4563	+	chr17_GL000258v2_alt	594064	750072	3203	+	*	0.9263	0.8537	0.08	0.09	0.41	0.04	0.75	0.46	0.14	0.89	0.14	0.31	0.53	0.26	0.76	0.36	1.78	1.11	0.83	1.69	0.83	0.7
cis_mRNA_overlap	0	Lnc-CompleteIn-mRNAIntron	LTCONS_00133835	MTCONS_00133831	chr17_GL000258v2_alt	643263	645906	2644	+	chr17_GL000258v2_alt	594064	692662	2433	+	*	0.9325	0.8268	0	0.04	0.07	0.02	0.17	0.19	0.08	0.31	0	0.11	0.57	0.28	2.12	0.51	3.13	2.57	1.96	5.1	0.62	0.97
cis_mRNA_overlap	0	Lnc-CompleteIn-mRNAIntron	LTCONS_00133835	MTCONS_00133832	chr17_GL000258v2_alt	643263	645906	2644	+	chr17_GL000258v2_alt	594064	750072	3203	+	*	0.8237	0.6799	0	0.04	0.07	0.02	0.17	0.19	0.08	0.31	0	0.11	0.53	0.26	0.76	0.36	1.78	1.11	0.83	1.69	0.83	0.7
tran	NA	NA	LTCONS_00133891	NM_016841.4	chr17_GL000258v2_alt	760485	761402	918	-	chr17	45894382	46028334	5544	+	-696.49	0.991	0.6926	0	0.15	0	0	0.35	0	0.07	4.35	0.13	0.23	0	0	0	0	0.05	0.02	0.06	0.44	0.02	0.03
tran	NA	NA	LTCONS_00133891	XM_005257371.4	chr17_GL000258v2_alt	760485	761402	918	-	chr17	45894602	46028334	5615	+	-696.49	0.9982	0.7229	0	0.15	0	0	0.35	0	0.07	4.35	0.13	0.23	0	0	0	0	0.02	0	0	0.25	0	0
cis_mRNA_dw20k	11636	NA	LTCONS_00133892	MTCONS_00133832	chr17_GL000258v2_alt	761707	763878	2172	-	chr17_GL000258v2_alt	594064	750072	3203	+	*	0.6759	0.8003	0	0	0	0	0.15	0.02	0	0.81	0	0	0.53	0.26	0.76	0.36	1.78	1.11	0.83	1.69	0.83	0.7
tran	NA	NA	LTCONS_00133892	MTCONS_00123115	chr17_GL000258v2_alt	761707	763878	2172	-	chr17	45894382	46028334	6696	+	-1646.49	0.9952	1	0	0	0	0	0.15	0.02	0	0.81	0	0	0	0	0	0	0.1	0.03	0	1.13	0	0
tran	NA	NA	LTCONS_00133892	NM_016841.4	chr17_GL000258v2_alt	761707	763878	2172	-	chr17	45894382	46028334	5544	+	-1579.37	0.9848	0.6098	0	0	0	0	0.15	0.02	0	0.81	0	0	0	0	0	0	0.05	0.02	0.06	0.44	0.02	0.03
tran	NA	NA	LTCONS_00133892	XM_005257371.4	chr17_GL000258v2_alt	761707	763878	2172	-	chr17	45894602	46028334	5615	+	-1590.62	0.9944	0.862	0	0	0	0	0.15	0.02	0	0.81	0	0	0	0	0	0	0.02	0	0	0.25	0	0
tran	NA	NA	LTCONS_00134018	MTCONS_00129316	chr17_KI270857v1_alt	2173509	2173912	404	+	chr17	37978155	37990691	3555	-	-298.23	0.8912	0.6774	0	0	0	0	0	2.8	0.32	3.62	0	1.32	0.1	0	0.48	0	0	0.8	0.25	1.06	0.31	0.28
tran	NA	NA	LTCONS_00134018	NM_001123391.3	chr17_KI270857v1_alt	2173509	2173912	404	+	chr17	38181476	38192555	2260	-	-299.06	0.8303	0.8492	0	0	0	0	0	2.8	0.32	3.62	0	1.32	0.06	0.12	0.03	0	0.08	0.35	0.18	0.26	0	0.27
tran	NA	NA	LTCONS_00134018	XM_005276914.3	chr17_KI270857v1_alt	2173509	2173912	404	+	chr17	36322242	36334759	3890	+	-290.69	0.9828	0.8876	0	0	0	0	0	2.8	0.32	3.62	0	1.32	0.37	0.47	0.72	0.36	0.48	3.18	0.8	4.26	0.28	1.1
tran	NA	NA	LTCONS_00134018	XM_006722246.3	chr17_KI270857v1_alt	2173509	2173912	404	+	chr17	37978161	37988274	2647	-	-304.71	0.8518	0.7423	0	0	0	0	0	2.8	0.32	3.62	0	1.32	0	0	0	0	0	0.49	0.45	1.04	0.09	0
cis_mRNA_overlap	0	Lnc-CompleteIn-mRNAIntron	LTCONS_00134072	MTCONS_00134071	chr17_KI270857v1_alt	2251531	2251857	327	-	chr17_KI270857v1_alt	2237982	2292274	824	-	*	0.9498	0.693	0.23	0.36	1.35	0.34	0.15	2.2	1.11	6.56	0.23	0.48	0.36	0.92	0.58	0.68	0.17	1.94	0.61	3.42	0.6	0.37
tran	NA	NA	LTCONS_00134176	XM_017024010.1	chr17_KI270909v1_alt	129447	130396	950	-	chr17	38004138	38011405	2855	+	-747.77	0.8446	0.6364	0	0.24	0.22	0.79	0.54	3.2	0.21	4.35	0.45	0.96	0.06	0.03	0.58	0.19	0.27	0.5	0.14	2.06	0.12	0.33
cis_mRNA_overlap	0	Lnc-AntiOverlap-mRNA	LTCONS_00134363	NM_003803.3	chr18	3117922	3120708	2088	+	chr18	3066807	3220108	5847	-	*	0.6634	0.6727	0.22	0.31	0.04	0.2	0.34	0.62	0.19	0	0.51	0.23	1.4	0.27	0.78	0.51	1.99	2.16	0.95	0	1	0.88
cis_mRNA_overlap	0	Lnc-CompleteIn-mRNAIntron	LTCONS_00135579	MTCONS_00135562	chr18	34494408	34552533	58126	+	chr18	34493290	34868812	4930	+	*	0.9948	0.9847	0.41	0.36	0.98	0.08	6.29	0.42	0.89	0.19	0.33	0.13	0.07	0.05	0.12	0	2.22	0.09	0.11	0	0.05	0
cis_mRNA_overlap	0	Lnc-CompleteIn-mRNAIntron	LTCONS_00135579	XM_017025590.1	chr18	34494408	34552533	58126	+	chr18	34493301	34891402	3526	+	*	0.9161	0.6074	0.41	0.36	0.98	0.08	6.29	0.42	0.89	0.19	0.33	0.13	0.25	0.53	0.28	0.1	1.4	0.27	0	0	0.2	0
cis_mRNA_overlap	0	Lnc-CompleteIn-mRNAIntron	LTCONS_00135745	XM_011526100.2	chr18	36895354	36896054	701	+	chr18	36829114	37160293	1482	+	*	0.8732	0.7416	0.15	0.15	0.37	0.04	0.92	1.76	0.14	0.99	0.11	0.93	1.3	1.22	1.35	1.01	1.77	2.82	0.82	1.92	1.6	1.34
cis_mRNA_overlap	0	Lnc-CompleteIn-mRNAIntron	LTCONS_00136099	XM_005258358.4	chr18	46961316	46969904	8589	+	chr18	46917642	47104795	5927	+	*	0.8856	0.7006	0.42	0.31	2.96	0.3	3.5	13.37	0.76	0.86	0.45	1.74	0	0	0	0	0.23	0.33	0	0	0	0
cis_mRNA_overlap	0	Lnc-CompleteIn-mRNAIntron	LTCONS_00136099	XM_017026029.1	chr18	46961316	46969904	8589	+	chr18	46917602	47098949	2822	+	*	0.9902	0.622	0.42	0.31	2.96	0.3	3.5	13.37	0.76	0.86	0.45	1.74	0.12	0.18	0.5	0.24	0.55	2.55	0	0.16	0	0.24
tran	62669	NA	LTCONS_00136099	NM_016427.2	chr18	46961316	46969904	8589	+	chr18	47032572	47035617	3046	-	-4599.1	0.9625	0.6097	0.42	0.31	2.96	0.3	3.5	13.37	0.76	0.86	0.45	1.74	0.02	0	0.01	0	0.01	0.12	0	0	0	0.01
cis_mRNA_dw20k	4073	NA	LTCONS_00137452	MTCONS_00140586	chr18	80147669	80178432	1171	+	chr18	80182504	80247514	1108	-	*	0.6565	0.655	0	0.1	0.05	0	0.49	0.61	0	0	0	0.07	0	0.19	0.12	0.05	0.17	0.81	0.07	0.5	0.04	0.07
cis_mRNA_overlap	0	Lnc-CompleteIn-mRNAIntron	LTCONS_00138681	NM_001242409.1	chr18	32313042	32330593	17552	-	chr18	32263521	32470484	7037	-	*	0.776	0.6848	0.17	0.03	1.33	0.13	0.78	0.26	1.26	0.2	0.08	0.38	0.77	0.16	1.31	0.87	1.6	0.49	2.1	0	0.95	1.17
cis_mRNA_overlap	0	Lnc-CompleteIn-mRNAIntron	LTCONS_00138681	NM_022751.2	chr18	32313042	32330593	17552	-	chr18	32263521	32470484	7034	-	*	0.6865	0.697	0.17	0.03	1.33	0.13	0.78	0.26	1.26	0.2	0.08	0.38	0.43	0.8	1.39	0.74	2.39	2.16	4.33	1.47	0.65	1.74
cis_mRNA_overlap	0	Lnc-CompleteIn-mRNAIntron	LTCONS_00138681	XM_017025919.1	chr18	32313042	32330593	17552	-	chr18	32268788	32470518	3072	-	*	0.8916	0.8788	0.17	0.03	1.33	0.13	0.78	0.26	1.26	0.2	0.08	0.38	0.12	0.03	0.65	0.27	0.63	0.48	1.05	0.16	0.2	0.38
cis_mRNA_dw20k	14678	NA	LTCONS_00138752	NM_001198943.1	chr18	34906521	34928571	17668	-	chr18	34817962	34891844	5655	+	*	0.8599	0.6964	0.16	1.51	0.22	0.03	2.39	0.35	0.41	0	0.78	0.21	0	0.14	0.16	0	0.32	0	0	0	0.05	0
cis_mRNA_dw20k	15120	NA	LTCONS_00138752	XM_017025587.1	chr18	34906521	34928571	17668	-	chr18	34493301	34891402	6060	+	*	0.9167	0.7697	0.16	1.51	0.22	0.03	2.39	0.35	0.41	0	0.78	0.21	0.49	1.47	0.45	0.1	6.2	0.26	0.13	0.09	0.86	0.08
cis_mRNA_dw20k	15120	NA	LTCONS_00138752	XM_017025590.1	chr18	34906521	34928571	17668	-	chr18	34493301	34891402	3526	+	*	0.9158	0.6197	0.16	1.51	0.22	0.03	2.39	0.35	0.41	0	0.78	0.21	0.25	0.53	0.28	0.1	1.4	0.27	0	0	0.2	0
cis_mRNA_dw20k	2795	NA	LTCONS_00140650	NM_005257.5	chr18	22205322	22210093	4772	.	chr18	22169437	22202528	3776	+	*	0.651	0.7964	0.17	0.02	0.37	0.13	0.12	0	0.38	0.05	0.03	0.1	1.14	0.49	1.91	1.41	2.54	0.23	1.62	0.54	0.23	1.3
cis_mRNA_dw20k	4965	NA	LTCONS_00142350	NM_000159.3	chr19	12904963	12905314	352	+	chr19	12891129	12899999	1883	+	*	0.6965	0.7173	0.31	0.53	2.4	0.9	0	0.91	0.74	0.81	0	1.66	21.76	7.14	28.99	29.03	3.03	8.95	18.52	9.79	5.63	23.01
cis_mRNA_overlap	0	Lnc-CompleteIn-mRNAIntron	LTCONS_00142350	XM_011527899.2	chr19	12904963	12905314	352	+	chr19	12891160	12915345	2671	+	*	0.8206	0.8875	0.31	0.53	2.4	0.9	0	0.91	0.74	0.81	0	1.66	0.03	0.1	0.2	0.16	0.02	0.18	0.19	0.09	0	0.24
cis_mRNA_dw20k	5426	NA	LTCONS_00142351	NM_000159.3	chr19	12905424	12906730	1307	+	chr19	12891129	12899999	1883	+	*	0.6041	0.6079	0.16	0.23	0.98	0.26	0.03	0.39	0.35	0.35	0.05	1.08	21.76	7.14	28.99	29.03	3.03	8.95	18.52	9.79	5.63	23.01
cis_mRNA_overlap	0	Lnc-CompleteIn-mRNAIntron	LTCONS_00142351	XM_011527899.2	chr19	12905424	12906730	1307	+	chr19	12891160	12915345	2671	+	*	0.8146	0.9179	0.16	0.23	0.98	0.26	0.03	0.39	0.35	0.35	0.05	1.08	0.03	0.1	0.2	0.16	0.02	0.18	0.19	0.09	0	0.24
cis_mRNA_dw20k	467	NA	LTCONS_00144119	MTCONS_00144108	chr19	35280287	35285143	702	+	chr19	35268978	35279821	1855	+	*	0.7136	0.6918	2.41	0	3.67	0.89	0	0	1.9	0	0	1.15	0.34	0	0.48	0.33	0.27	0.1	0.2	0.26	0.21	0.31
cis_mRNA_overlap	0	Lnc-Overlap-mRNA	LTCONS_00144119	NM_021175.3	chr19	35280287	35285143	702	+	chr19	35282346	35285143	588	+	-375.09	0.9459	0.9116	2.41	0	3.67	0.89	0	0	1.9	0	0	1.15	564.64	17.7	515.41	180.54	3.76	0.06	323.56	0.52	1.58	323.62
cis_mRNA_dw20k	6949	NA	LTCONS_00144493	XM_017026424.1	chr19	37251885	37260019	3599	+	chr19	37227392	37244937	3008	+	*	0.7166	0.6603	0	0.01	0.01	0	0	0.06	0	0.04	0	0	0	0.04	0	0	0	0.07	0	0	0	0
cis_mRNA_overlap	0	Lnc-Overlap-mRNA	LTCONS_00144951	MTCONS_00144952	chr19	40924063	40998612	3269	+	chr19	40924254	40950699	3092	+	*	0.8707	0.8788	0.54	3.67	1.27	0.73	1.35	0.32	2.56	0.01	6.09	0.51	0.46	8.97	0.96	1.15	10.41	0.42	2.27	0	17.5	1.19
cis_mRNA_overlap	0	Lnc-Overlap-mRNA	LTCONS_00144951	MTCONS_00144953	chr19	40924063	40998612	3269	+	chr19	40924255	40950699	16643	+	*	0.6535	0.7697	0.54	3.67	1.27	0.73	1.35	0.32	2.56	0.01	6.09	0.51	2.58	9.09	7.06	4.13	29.21	2.54	13.49	0.1	27.34	9.25
cis_mRNA_overlap	0	Lnc-Overlap-mRNA	LTCONS_00144954	MTCONS_00144949	chr19	40924255	40998612	6412	+	chr19	40924063	40940123	1849	+	*	0.8596	0.9192	0	0.72	0	0.09	3.82	0.45	0	0	8.01	0.55	1.14	4.89	1.84	3.86	21.38	2.21	1.99	0.17	17.32	2.23
cis_mRNA_overlap	0	Lnc-Overlap-mRNA	LTCONS_00144954	MTCONS_00144952	chr19	40924255	40998612	6412	+	chr19	40924254	40950699	3092	+	*	0.9216	0.7379	0	0.72	0	0.09	3.82	0.45	0	0	8.01	0.55	0.46	8.97	0.96	1.15	10.41	0.42	2.27	0	17.5	1.19
cis_mRNA_overlap	0	Lnc-Overlap-mRNA	LTCONS_00144954	MTCONS_00144953	chr19	40924255	40998612	6412	+	chr19	40924255	40950699	16643	+	*	0.8405	0.6128	0	0.72	0	0.09	3.82	0.45	0	0	8.01	0.55	2.58	9.09	7.06	4.13	29.21	2.54	13.49	0.1	27.34	9.25
cis_mRNA_overlap	0	Lnc-Overlap-mRNA	LTCONS_00144958	MTCONS_00144960	chr19	40991200	40998612	7315	+	chr19	40991200	41018402	3702	+	*	0.7862	0.8667	9.74	2.17	31.47	8.16	1.11	2.65	41.9	0.56	2.38	43.41	9.21	4.03	47.36	10.13	3.19	1.3	59.64	0.78	3.96	13.15
cis_mRNA_overlap	0	Lnc-Overlap-mRNA	LTCONS_00144958	XM_006723050.3	chr19	40991200	40998612	7315	+	chr19	40991203	41016769	1579	+	*	0.7458	0.6364	9.74	2.17	31.47	8.16	1.11	2.65	41.9	0.56	2.38	43.41	4.22	3.64	9.27	1.69	0.75	0	9.8	0.87	3.12	3.53
cis_mRNA_overlap	0	Lnc-Overlap-mRNA	LTCONS_00144958	XM_011526546.2	chr19	40991200	40998612	7315	+	chr19	40991200	41012966	1409	+	*	0.9084	0.8788	9.74	2.17	31.47	8.16	1.11	2.65	41.9	0.56	2.38	43.41	3.03	0.59	12.11	3.92	0.32	0.16	13.71	0.1	1.96	7.41
cis_mRNA_up10k	5324	NA	LTCONS_00144958	XM_011526550.2	chr19	40991200	40998612	7315	+	chr19	41003935	41018402	2466	+	*	0.8787	0.8879	9.74	2.17	31.47	8.16	1.11	2.65	41.9	0.56	2.38	43.41	1.29	0	4.32	0.46	0	0	3.42	0	0.1	2.19
cis_mRNA_up10k	5758	NA	LTCONS_00144958	XM_011526549.2	chr19	40991200	40998612	7315	+	chr19	41004369	41018402	2613	+	*	0.6839	0.7576	9.74	2.17	31.47	8.16	1.11	2.65	41.9	0.56	2.38	43.41	1.71	0.68	5.17	0.1	0	0.79	4.59	0.06	0.63	0.75
cis_mRNA_dw20k	17408	NA	LTCONS_00145269	XM_017026636.1	chr19	43870693	43871439	747	+	chr19	43840524	43853286	12666	+	*	0.7453	0.8476	0.11	0.04	0.43	0.17	0.05	0.19	0.09	0.19	0.04	1.14	0.45	0.41	0.55	0.38	0.35	0.74	0.44	0.61	0.14	0.87
cis_mRNA_overlap	0	Lnc-Overlap-mRNA	LTCONS_00145539	NM_006732.2	chr19	45467995	45475179	6801	+	chr19	45467995	45475179	3776	+	-2622.14	0.72	0.8037	2.37	0.02	0.34	0.49	0.01	0.46	1.45	0	0.23	2.28	2.56	0	0	1.81	0	0.75	4.77	0.14	0.08	1.95
cis_mRNA_dw20k	10110	NA	LTCONS_00145541	NM_005619.4	chr19	45467995	45475179	5552	+	chr19	45485288	45497055	2288	-	*	-0.699	-0.6462	1.17	0	0.04	0.62	0	0.59	1.14	0.06	0	1.24	0.07	0.37	0.13	0.04	0.33	0	0	0.5	0.2	0.1
cis_mRNA_overlap	0	Lnc-Overlap-mRNA	LTCONS_00145541	NM_006732.2	chr19	45467995	45475179	5552	+	chr19	45467995	45475179	3776	+	-2574.38	0.8624	0.9006	1.17	0	0.04	0.62	0	0.59	1.14	0.06	0	1.24	2.56	0	0	1.81	0	0.75	4.77	0.14	0.08	1.95
cis_mRNA_overlap	0	Lnc-AntiOverlap-mRNA	LTCONS_00149757	NM_021047.2	chr19	19879786	19900759	7715	-	chr19	19865905	19893484	2329	+	-3765.19	0.6887	0.6228	0	0	0	0	0.03	0.05	0	0	0	0	2.04	1.08	0.9	1.24	1.61	2.42	1.1	1.27	0.62	1.57
cis_mRNA_up10k	155	NA	LTCONS_00149757	NM_031218.3	chr19	19879786	19900759	7715	-	chr19	19900913	19935573	2794	+	-2523.27	0.876	0.6228	0	0	0	0	0.03	0.05	0	0	0	0	0.63	0.18	0.29	0.19	0.51	2.14	0.26	0.11	0.09	0.38
tran	2069936	NA	LTCONS_00149757	XM_017027257.1	chr19	19879786	19900759	7715	-	chr19	21970694	22010990	4200	-	-2881.56	0.8719	0.6658	0	0	0	0	0.03	0.05	0	0	0	0	0.14	0.06	0.08	0.08	0.14	0.35	0.09	0	0.02	0.01
tran	2151690	NA	LTCONS_00149757	NM_001316996.1	chr19	19879786	19900759	7715	-	chr19	22052448	22091103	3659	+	-2590.14	0.8679	1	0	0	0	0	0.03	0.05	0	0	0	0	0	0	0	0	0.04	0.82	0	0	0	0
tran	4186402	NA	LTCONS_00149757	NM_001278678.1	chr19	19879786	19900759	7715	-	chr19	24087160	24129968	3893	+	-2606.54	0.6596	0.9753	0	0	0	0	0.03	0.05	0	0	0	0	0	0	0	0	0.19	0.05	0	0	0	0
tran	NA	NA	LTCONS_00149757	MTCONS_00251902	chr19	19879786	19900759	7715	-	chr5	178711521	178730702	2685	-	-1483.92	0.697	0.7016	0	0	0	0	0.03	0.05	0	0	0	0	0	0	0	0	0.08	0.5	0.05	0.35	0	0
tran	NA	NA	LTCONS_00149757	NM_001271640.1	chr19	19879786	19900759	7715	-	chr7	64794388	64833681	2679	+	-2032.72	0.803	0.7028	0	0	0	0	0.03	0.05	0	0	0	0	0.12	0.31	0.2	0	0.45	0.56	0.32	0.03	0	0.05
tran	NA	NA	LTCONS_00149757	NM_001287532.1	chr19	19879786	19900759	7715	-	chr7	65373799	65401135	3124	+	-2309.25	0.7476	0.6139	0	0	0	0	0.03	0.05	0	0	0	0	0	0	0	0	0.13	0.56	0.28	0.24	0	0
tran	NA	NA	LTCONS_00149757	NM_001287534.1	chr19	19879786	19900759	7715	-	chr7	65373799	65401135	2997	+	-2288.12	0.8673	0.7006	0	0	0	0	0.03	0.05	0	0	0	0	0.32	0.15	0.12	0.06	0.4	0.64	0.18	0	0.05	0.26
tran	NA	NA	LTCONS_00149757	NM_001289930.1	chr19	19879786	19900759	7715	-	chr4	124476	164159	4292	+	-2325.72	0.8897	0.7006	0	0	0	0	0.03	0.05	0	0	0	0	0.32	0.25	0.73	0.21	0.82	2.05	0.6	0.56	0.19	0.04
tran	NA	NA	LTCONS_00149757	NM_005649.2	chr19	19879786	19900759	7715	-	chr5	178711521	178730702	2555	-	-1478.35	0.9464	0.7006	0	0	0	0	0.03	0.05	0	0	0	0	0.58	0.06	0.35	0.43	1.88	6.07	0.54	0.72	0.07	0.52
tran	NA	NA	LTCONS_00149757	NM_020394.4	chr19	19879786	19900759	7715	-	chr1	246985323	247008093	3377	-	-2315.91	0.8639	0.7183	0	0	0	0	0.03	0.05	0	0	0	0	0	0.01	0.01	0.01	0.05	0.93	0.02	0.04	0	0
tran	NA	NA	LTCONS_00149757	XM_011519269.2	chr19	19879786	19900759	7715	-	chr9	88036710	88039819	3110	-	-3268.24	0.6899	0.7392	0	0	0	0	0.03	0.05	0	0	0	0	0.01	0	0	0.01	0.05	0.02	0.01	0	0	0
cis_mRNA_dw20k	10187	NA	LTCONS_00152071	NM_001145714.1	chr19	47220822	47227274	1808	-	chr19	47130823	47210636	2389	+	*	0.7036	0.7477	0.04	0.14	0.16	0.04	0.47	0.46	0.11	0.24	0.17	0	0.63	0.66	0.33	0.19	0.87	2.84	0.56	1.87	0.96	0.48
cis_mRNA_dw20k	623	NA	LTCONS_00153051	NM_001031665.2	chr19	52948028	52948757	730	-	chr19	52949379	52962911	2747	-	*	0.6477	0.7553	0.92	0.11	0.18	0.35	0.29	0.29	0.59	0	0.07	0.29	0.3	0	0.06	0.3	0	0.29	0.12	0	0	0
cis_mRNA_dw20k	623	NA	LTCONS_00153051	NM_001202457.1	chr19	52948028	52948757	730	-	chr19	52949379	52962911	2596	-	*	0.69	0.7508	0.92	0.11	0.18	0.35	0.29	0.29	0.59	0	0.07	0.29	0.96	0.25	0.42	0.77	0.36	1.06	0.77	0.3	0.33	0.86
cis_mRNA_overlap	0	Lnc-CompleteIn-mRNAIntron	LTCONS_00153051	NM_001202473.1	chr19	52948028	52948757	730	-	chr19	52927135	52962911	2680	-	*	0.8728	0.743	0.92	0.11	0.18	0.35	0.29	0.29	0.59	0	0.07	0.29	0.66	0.16	0.19	0.28	0.16	0.46	0.46	0.22	0.08	0.22
cis_mRNA_overlap	0	Lnc-CompleteIn-mRNAIntron	LTCONS_00153104	NM_001322130.1	chr19	53077708	53079312	1605	-	chr19	53066614	53103434	4568	-	*	0.6264	0.6085	0.23	0.17	0.79	0.29	0.18	0.48	0.74	0.26	0.29	0.87	0	0	0	0	0	0.14	0.14	0	0.03	0.11
cis_mRNA_overlap	0	Lnc-CompleteIn-mRNAIntron	LTCONS_00153104	NM_001322131.1	chr19	53077708	53079312	1605	-	chr19	53066614	53103434	4443	-	*	0.8043	0.8328	0.23	0.17	0.79	0.29	0.18	0.48	0.74	0.26	0.29	0.87	0.67	0.2	1.48	0.48	0.47	0.92	1.16	1.19	0.78	1.24
cis_mRNA_overlap	0	Lnc-CompleteIn-mRNAIntron	LTCONS_00153104	NM_001322134.1	chr19	53077708	53079312	1605	-	chr19	53066614	53103434	4360	-	*	0.6946	0.6093	0.23	0.17	0.79	0.29	0.18	0.48	0.74	0.26	0.29	0.87	0.11	0.06	0.23	0.1	0	0	0.38	0	0.44	0.9
cis_mRNA_overlap	0	Lnc-CompleteIn-mRNAIntron	LTCONS_00153104	XM_017027445.1	chr19	53077708	53079312	1605	-	chr19	53064882	53086924	6300	-	*	0.7587	0.6869	0.23	0.17	0.79	0.29	0.18	0.48	0.74	0.26	0.29	0.87	0.38	0	0.71	0.29	0.34	0.3	0.55	0.26	0.73	1.17
tran	NA	NA	LTCONS_00154367	NM_006589.2	chr1_GL383519v1_alt	52229	53499	1076	-	chr1	155247205	155255483	3190	-	-807	0.9566	0.7393	0.46	0.44	0.34	0.37	1.95	2.98	0.75	4.94	0.75	0.32	0	0	0.03	0	0.08	0.51	0	0.67	0.1	0
tran	NA	NA	LTCONS_00154419	XM_017003079.1	chr1_KI270713v1_random	33082	34568	1487	+	chr1	16733778	16736188	2411	-	-825.01	0.854	0.7016	0.03	0	0	0.18	0.25	1.53	0.38	0.92	0.06	0.09	0	0	0.02	0.01	0.03	0.17	0.08	0.04	0.05	0
cis_mRNA_dw20k	667	NA	LTCONS_00154424	MTCONS_00154425	chr1_KI270714v1_random	13193	15208	2016	-	chr1_KI270714v1_random	15874	23097	1630	-	*	0.9336	0.9544	0.38	0.38	1.28	0.54	0.8	0.49	1.83	0.47	0.3	2.12	0.48	0.28	1.3	0.66	0.78	0.49	1.12	0.61	0.31	2.05
cis_mRNA_dw20k	3935	NA	LTCONS_00155611	MTCONS_00155598	chr2	21151336	21165334	13999	+	chr2	21070875	21147402	20852	+	*	0.829	0.7439	0.41	0.33	0.88	0.1	0.38	0.11	0.67	0.13	0.1	0.51	1.24	1.32	1.47	0.14	0.5	0.07	1.02	0.13	0.14	0.88
cis_mRNA_overlap	0	Lnc-AntiOverlap-mRNA	LTCONS_00156606	NM_006449.4	chr2	37455822	37660596	45059	+	chr2	37641882	37672199	5715	-	*	0.8499	0.6338	0.04	0	0	0.02	0	0	0	0	0	0.01	0.7	0.26	0.24	0.62	0.4	0.13	0.39	0.18	0.33	0.32
cis_mRNA_overlap	0	Lnc-CompleteIn-mRNAIntron	LTCONS_00157456	NM_001039753.2	chr2	54744754	54778575	33822	+	chr2	54725012	54972021	7853	+	*	0.9468	0.7073	0.02	0.02	0.06	0.03	0.31	0.14	0.08	0.82	0.05	0.09	0.12	0.24	0.18	0.18	0.28	0.45	0.22	1.24	0.27	0.21
cis_mRNA_overlap	0	Lnc-CompleteIn-mRNAIntron	LTCONS_00157456	XM_017004100.1	chr2	54744754	54778575	33822	+	chr2	54724857	54967093	6093	+	*	0.7491	0.7439	0.02	0.02	0.06	0.03	0.31	0.14	0.08	0.82	0.05	0.09	0	0	0.07	0.03	0.28	0.05	0.04	0.21	0.06	0.01
cis_mRNA_overlap	0	Lnc-CompleteIn-mRNAIntron	LTCONS_00157456	XM_017004102.1	chr2	54744754	54778575	33822	+	chr2	54723467	54900895	4147	+	*	0.8004	0.7142	0.02	0.02	0.06	0.03	0.31	0.14	0.08	0.82	0.05	0.09	0.01	0	0	0	0.04	0.04	0.03	0.06	0.02	0
cis_mRNA_overlap	0	Lnc-AntiOverlap-mRNA	LTCONS_00157474	XM_011532968.2	chr2	55282350	55340457	1428	+	chr2	55287842	55419624	9297	-	*	0.7346	0.6128	0.15	0.27	0.49	0.17	0.21	0.5	0.03	0.16	1.47	0.48	0.05	0.08	0	0.07	0	0.12	0	0	0.16	0.06
cis_mRNA_up10k	7634	NA	LTCONS_00158299	NM_003096.3	chr2	70301404	70303312	529	+	chr2	70281362	70293771	625	-	*	0.6931	0.7128	0.22	1.46	0	0.32	0.15	0.36	0	0	0.17	0	30.52	68.89	24.72	25.07	29.66	77.56	21.93	32.79	40.88	19.72
cis_mRNA_overlap	0	Lnc-Overlap-mRNA	LTCONS_00159389	NM_013434.4	chr2	95297324	95307067	8515	+	chr2	95297324	95386077	2914	+	*	0.9802	0.8228	0	0.01	0.03	0.02	0.54	1.44	0.06	0.01	0.15	0.01	0	0	0	0	0.51	1.77	0	0	0.47	0
cis_mRNA_overlap	0	Lnc-CompleteIn-mRNAIntron	LTCONS_00159981	NM_001320980.1	chr2	102109004	102113123	4120	+	chr2	102104574	102179874	5207	+	*	0.7396	0.6018	0.83	0.39	1.55	0.47	1	1.62	6.75	2.92	0.34	3.08	7.59	2.08	5.96	4.39	0	0	11.63	9.81	0.47	8.58
cis_mRNA_up10k	378	NA	LTCONS_00160398	XM_011511109.2	chr2	109128454	109129062	609	+	chr2	109129439	109484065	6513	+	*	0.9801	0.7156	0.32	0	0.17	0.18	0.36	0.12	0.46	2.67	0.09	0.15	0.01	0	0.1	0.02	0.03	0.02	0.06	0.55	0	0.03
cis_mRNA_overlap	0	Lnc-AntiCompleteIn-mRNAIntron	LTCONS_00160798	MTCONS_00174609	chr2	113237534	113241410	3778	+	chr2	113215997	113278950	4061	-	*	0.6279	0.6833	0.38	0.37	0.48	0.2	1.57	0.1	0.35	2.25	0.5	0.41	0	0	0	0	0.05	0	0	0.01	0	0
cis_mRNA_up10k	58	NA	LTCONS_00161239	MTCONS_00175023	chr2	121649600	121693511	42349	+	chr2	121337708	121649543	8963	-	*	0.8753	0.8987	0.01	0	0	0	0	0	0.01	0	0	0.01	0.18	0	0	0.11	0	0	0.16	0	0	0.33
cis_mRNA_dw20k	6317	NA	LTCONS_00163711	NM_152517.2	chr2	177392743	177543836	8939	+	chr2	177550152	177552796	2645	-	*	0.7978	0.6896	0.16	0.12	0	0.1	0	0	0	0.64	0	0	1.25	1.26	0.91	1.11	1.08	1.03	0.97	1.68	0.93	1.43
cis_mRNA_overlap	0	mRNA-CompleteIn-LncExon	LTCONS_00163711	NM_003659.3	chr2	177392743	177543836	8939	+	chr2	177392743	177543836	7665	+	-2971.93	0.8832	0.6486	0.16	0.12	0	0.1	0	0	0	0.64	0	0	4.53	9.01	4.34	5.43	7.93	3.34	4.01	15.59	4.36	4.82
cis_mRNA_up10k	8232	NA	LTCONS_00163783	XM_005246627.2	chr2	178413659	178443038	3344	+	chr2	178451269	178461390	1756	+	*	0.6329	0.6558	0	0.05	0.01	0	0.15	0.1	0.09	0.09	0	0.02	0	0.04	0	0	0.04	0.04	0	0	0	0
cis_mRNA_dw20k	14227	NA	LTCONS_00163791	MTCONS_00163739	chr2	178413659	178443038	9760	+	chr2	178193642	178399433	7234	+	*	0.9126	0.7474	0	0	0	0	0	0.03	0	0	0.02	0	0.19	0.09	0	0	0	1.07	0	0	0.47	0.37
cis_mRNA_dw20k	14476	NA	LTCONS_00163791	XM_017003270.1	chr2	178413659	178443038	9760	+	chr2	178194498	178399184	7035	+	*	0.9298	0.7894	0	0	0	0	0	0.03	0	0	0.02	0	0	0.08	0	0	0	0.23	0.04	0	0.12	0
cis_mRNA_overlap	0	Lnc-AntiOverlap-mRNA	LTCONS_00163791	NM_001139518.1	chr2	178413659	178443038	9760	+	chr2	178431414	178450628	1627	-	*	0.9507	0.75	0	0	0	0	0	0.03	0	0	0.02	0	0	0	0.05	0	0	1.36	0.12	0.12	0.47	0
cis_mRNA_overlap	0	Lnc-Overlap-mRNA	LTCONS_00164038	NM_001080545.2	chr2	181954373	182118846	2047	+	chr2	181985824	182117756	1078	+	-386.22	0.6415	0.821	0.56	0.06	0.26	0.64	0.06	0	0.16	0	0.11	0.81	0.17	0	0.47	0.99	0.05	0	0	0	0.11	0.27
cis_mRNA_overlap	0	Lnc-Overlap-mRNA	LTCONS_00164038	NM_001261425.1	chr2	181954373	182118846	2047	+	chr2	181985824	182131382	3032	+	*	0.7334	0.8558	0.56	0.06	0.26	0.64	0.06	0	0.16	0	0.11	0.81	0.27	0.04	0.05	0.16	0.02	0.01	0.1	0	0.01	0.1
cis_mRNA_overlap	0	Lnc-Overlap-mRNA	LTCONS_00164039	NM_001261425.1	chr2	181954378	182118846	2103	+	chr2	181985824	182131382	3032	+	*	0.7896	0.8116	0.43	0.17	0.24	0.15	0	0	0.14	0	0	0.37	0.27	0.04	0.05	0.16	0.02	0.01	0.1	0	0.01	0.1
cis_mRNA_overlap	0	Lnc-AntiOverlap-mRNA	LTCONS_00164179	XM_005246231.3	chr2	187339462	187347865	8404	+	chr2	187343119	187448270	5043	-	-6150.92	0.6938	0.6893	0.03	0.41	0.03	0.05	0.04	0.03	0.05	0	0.84	0.01	3.42	4.19	2.62	2.78	3.12	2.36	2.4	1.03	4.07	2.43
cis_mRNA_overlap	0	Lnc-AntiOverlap-mRNA	LTCONS_00164181	XM_005246231.3	chr2	187357680	187360946	3267	+	chr2	187343119	187448270	5043	-	*	0.7147	0.6524	0.01	0.37	0.02	0.03	0.04	0.02	0.03	0	0.62	0.03	3.42	4.19	2.62	2.78	3.12	2.36	2.4	1.03	4.07	2.43
cis_mRNA_overlap	0	Lnc-AntiCompleteIn-mRNAIntron	LTCONS_00164182	XM_005246231.3	chr2	187361047	187362632	1586	+	chr2	187343119	187448270	5043	-	*	0.7245	0.7176	0.01	0.3	0	0.06	0	0	0	0	0.44	0.02	3.42	4.19	2.62	2.78	3.12	2.36	2.4	1.03	4.07	2.43
cis_mRNA_overlap	0	Lnc-AntiCompleteIn-mRNAIntron	LTCONS_00164183	XM_005246231.3	chr2	187366580	187368835	2256	+	chr2	187343119	187448270	5043	-	*	0.6236	0.7915	0.05	0.1	0.01	0.02	0.03	0.04	0.01	0	0.42	0.01	3.42	4.19	2.62	2.78	3.12	2.36	2.4	1.03	4.07	2.43
cis_mRNA_overlap	0	Lnc-AntiCompleteIn-mRNAIntron	LTCONS_00164184	XM_005246231.3	chr2	187368970	187370121	1152	+	chr2	187343119	187448270	5043	-	*	0.6713	0.6358	0	0.27	0.08	0	0.03	0	0	0	0.59	0.03	3.42	4.19	2.62	2.78	3.12	2.36	2.4	1.03	4.07	2.43
cis_mRNA_overlap	0	Lnc-Overlap-mRNA	LTCONS_00164440	XM_017004722.1	chr2	191678072	191688522	4685	+	chr2	191678135	191684138	2429	+	-1143.08	0.6198	0.7599	0.53	1.37	0.08	0	1.71	1.14	0.25	0	0.52	1.25	2.05	2.16	1.18	1.2	1.81	1.75	0.55	1.14	1.24	1.23
cis_mRNA_dw20k	7402	NA	LTCONS_00165418	NM_006916.2	chr2	210029661	210037054	4508	+	chr2	210002565	210022260	3227	+	*	0.7093	0.8034	0	0.16	0	0	0	0.09	0.01	0	0.07	0.1	0	0.12	0	0	0	0.28	0	0	0	0.25
cis_mRNA_overlap	0	Lnc-AntiOverlap-mRNA	LTCONS_00165548	MTCONS_00179177	chr2	214809183	214969553	8522	+	chr2	214739081	214809711	2086	-	*	0.7925	0.8632	0.07	0.23	0.06	0.05	0.13	0.35	0	0.28	0	0.12	0.93	1.02	0.39	0.78	1.03	4.64	0.42	1.4	0.41	0.56
cis_mRNA_overlap	0	Lnc-AntiOverlap-mRNA	LTCONS_00165548	NM_015657.3	chr2	214809183	214969553	8522	+	chr2	214931542	215032086	8085	-	*	0.7183	0.6247	0.07	0.23	0.06	0.05	0.13	0.35	0	0.28	0	0.12	0	0.01	0	0	0	0.04	0	0	0	0
cis_mRNA_dw20k	12399	NA	LTCONS_00166241	MTCONS_00166236	chr2	222730176	222730921	746	+	chr2	222671642	222717778	8835	+	*	0.8284	0.8406	0.07	0	0.6	0.41	0	0.28	0.18	0.19	0	1.02	0.08	0.11	0.53	0.52	0.14	0.27	0.37	0.74	0.04	0.91
cis_mRNA_dw20k	12399	NA	LTCONS_00166241	MTCONS_00166238	chr2	222730176	222730921	746	+	chr2	222671677	222717778	8857	+	*	0.7267	0.7301	0.07	0	0.6	0.41	0	0.28	0.18	0.19	0	1.02	0.35	0.31	1.44	0.6	0.06	0.3	0.67	1.32	0.13	1.26
cis_mRNA_overlap	0	Lnc-AntiOverlap-mRNA	LTCONS_00166508	XM_017003968.1	chr2	230121370	230173561	1800	+	chr2	230165466	230225625	6229	-	*	0.9293	0.9753	0	0	0.06	0.08	0	0	0	0	0	0	0	0	0.03	0.02	0	0	0	0	0	0
cis_mRNA_dw20k	10187	NA	LTCONS_00168126	NM_001256477.1	chr2	6826926	6840464	12503	-	chr2	6850650	6865819	2149	-	*	0.9196	0.6444	1.28	0.38	0.29	0.27	0.09	0.15	0.27	0.02	0.06	0.41	0.76	0.42	0.04	0.19	0.05	0.15	0.2	0	0.08	0.14
cis_mRNA_dw20k	7846	NA	LTCONS_00168126	NM_207315.3	chr2	6826926	6840464	12503	-	chr2	6848309	6865819	3014	-	*	0.9544	0.7599	1.28	0.38	0.29	0.27	0.09	0.15	0.27	0.02	0.06	0.41	8.27	3.02	1.55	0.8	1.23	2.23	2.08	0.41	0.42	1.66
cis_mRNA_dw20k	90	NA	LTCONS_00168126	MTCONS_00168132	chr2	6826926	6840464	12503	-	chr2	6840553	6865819	2170	-	*	0.8631	0.7323	1.28	0.38	0.29	0.27	0.09	0.15	0.27	0.02	0.06	0.41	1.11	0.54	0.39	0.49	0	0.08	0.55	0	0	0.07
cis_mRNA_overlap	0	Lnc-CompleteIn-mRNAIntron	LTCONS_00168680	NM_030797.3	chr2	16611263	16617573	6311	-	chr2	16549459	16665866	4702	-	*	0.7784	0.8303	1.11	0.31	1.02	0.56	0.61	0.79	0.9	0.28	0.11	0.39	2.14	0.9	1.51	1.41	0.64	2.46	1.97	0.46	0.51	1.4
cis_mRNA_overlap	0	Lnc-CompleteIn-mRNAIntron	LTCONS_00168680	XM_006712108.3	chr2	16611263	16617573	6311	-	chr2	16549988	16625769	4128	-	*	0.6595	0.6687	1.11	0.31	1.02	0.56	0.61	0.79	0.9	0.28	0.11	0.39	0.38	0	0.57	0.48	0.63	0.74	0.23	0	0.03	0.16
cis_mRNA_overlap	0	mRNA-CompleteIn-LncExon	LTCONS_00168795	NM_001008237.2	chr2	19896631	19901986	1174	-	chr2	19896631	19901986	944	-	-329.76	0.9455	0.7927	1.55	3.38	0.18	0.63	0	1.51	0.34	0.41	1.06	0.34	1.25	3.22	0.49	0.84	0.47	1.59	0.8	0.47	0.52	0.79
cis_mRNA_overlap	0	Lnc-CompleteIn-mRNAIntron	LTCONS_00168873	MTCONS_00168843	chr2	20351129	20351697	569	-	chr2	20248692	20352423	10321	-	*	0.9542	0.6228	0.1	0.2	0.3	0.29	0	2.42	0.31	0.14	0.75	0.17	0	0	0	0	0	1.28	0.18	0	0	0
cis_mRNA_overlap	0	Lnc-CompleteIn-mRNAIntron	LTCONS_00169264	NM_018263.4	chr2	25811411	25828477	17067	-	chr2	25739384	25878443	7174	-	*	0.8464	0.772	0.17	0.15	0.65	0.17	0.85	1.99	0.52	2.57	0.27	1.02	1.25	0.92	1.58	1.1	2.63	2.72	2.43	6.46	1.7	1.11
cis_mRNA_overlap	0	Lnc-AntiOverlap-mRNA	LTCONS_00170625	XM_005264282.2	chr2	48239922	48315676	5759	-	chr2	48314640	48379295	5337	+	*	0.806	0.7394	0.03	0.05	0.01	0	0.05	0.02	0	0.06	0.05	0	3.27	7.79	3.21	3.74	8.13	8.9	2.61	13.64	9.68	4.73
cis_mRNA_overlap	0	Lnc-AntiOverlap-mRNA	LTCONS_00170625	XM_017003959.1	chr2	48239922	48315676	5759	-	chr2	48315000	48379295	5501	+	*	0.6241	0.6031	0.03	0.05	0.01	0	0.05	0.02	0	0.06	0.05	0	0.21	0.28	0	0	0	0.22	0	0.15	0.3	0
cis_mRNA_overlap	0	Lnc-CompleteIn-mRNAIntron	LTCONS_00171358	XM_017004251.1	chr2	63770578	63827833	6369	-	chr2	63120755	63840825	4552	-	*	0.742	0.6898	0.13	0	0.05	0	0	0.05	0	7.69	0	0.08	0.22	0.1	0.32	0.24	0	0.28	0	0.54	0.14	0.2
cis_mRNA_dw20k	2592	NA	LTCONS_00171739	NM_001244710.1	chr2	69315214	69317178	1965	-	chr2	69319769	69387254	8703	-	*	0.6571	0.6237	0.14	0.61	0.49	0.18	0.86	1.43	0.68	0.96	0.22	0.4	0	0	0.14	0	0.07	0.13	0	0.07	0	0
cis_mRNA_dw20k	2592	NA	LTCONS_00171739	NM_002056.3	chr2	69315214	69317178	1965	-	chr2	69319769	69387254	8649	-	*	0.8007	0.9394	0.14	0.61	0.49	0.18	0.86	1.43	0.68	0.96	0.22	0.4	4.55	10.27	5.28	3.9	9.69	10.36	6.45	13.81	4.69	5.02
cis_mRNA_dw20k	6971	NA	LTCONS_00171739	XM_017003802.1	chr2	69315214	69317178	1965	-	chr2	69324148	69383069	4226	-	*	0.758	0.9273	0.14	0.61	0.49	0.18	0.86	1.43	0.68	0.96	0.22	0.4	6.48	12.64	8.06	4.43	15.07	16.42	10.62	26.94	8.2	6.79
cis_mRNA_dw20k	14792	NA	LTCONS_00172352	NM_016297.3	chr2	70295976	70302088	2430	-	chr2	70258099	70281185	5377	+	*	-0.8932	-0.6464	2.41	3.87	1.36	1.25	3.38	8.62	3.38	3.35	2.29	1.36	32.75	33.8	43.12	37.56	27.69	16.03	33.22	31.3	29.41	41.21
cis_mRNA_overlap	0	mRNA-CompleteIn-LncExon	LTCONS_00172352	NM_032822.2	chr2	70295976	70302088	2430	-	chr2	70295976	70302088	1807	-	-947.23	0.7892	0.7134	2.41	3.87	1.36	1.25	3.38	8.62	3.38	3.35	2.29	1.36	6.61	16.76	8.38	7.16	8.82	17.56	8	12.48	6.06	7.94
tran	96620	NA	LTCONS_00172404	XM_005264311.4	chr2	71085709	71086119	411	-	chr2	71182738	71226506	6276	-	-261.7	0.9054	0.9285	0.86	1.3	1.63	2.78	0.1	0.72	3.03	0.45	0.68	0.65	0.13	0.03	0.16	0.25	0	0.09	0.25	0	0	0
tran	96620	NA	LTCONS_00172404	XM_011532843.2	chr2	71085709	71086119	411	-	chr2	71182738	71227110	6272	-	-261.7	0.8798	0.8651	0.86	1.3	1.63	2.78	0.1	0.72	3.03	0.45	0.68	0.65	0.47	0.22	0.23	0.61	0	0.07	1.15	0.08	0	0
cis_mRNA_dw20k	12814	NA	LTCONS_00173752	MTCONS_00173758	chr2	99148293	99154962	326	-	chr2	99167775	99181073	823	-	*	0.795	0.8608	0.12	0.12	0	0	0.71	0.29	0	0.39	0.69	0	0	0.16	0	0	0.81	0.28	0.09	0.42	0.19	0
cis_mRNA_overlap	0	Lnc-Overlap-mRNA	LTCONS_00173752	XM_017005041.1	chr2	99148293	99154962	326	-	chr2	98997261	99154917	3786	-	-185.02	0.7076	0.7308	0.12	0.12	0	0	0.71	0.29	0	0.39	0.69	0	0.04	0	0	0	0.04	0	0	0.02	0.03	0
cis_mRNA_overlap	0	Lnc-CompleteIn-mRNAIntron	LTCONS_00173825	XM_011511169.2	chr2	99967339	99986198	18860	-	chr2	99545861	100105583	9510	-	*	0.905	0.7902	0.25	0.22	0.33	0.17	2.81	1.14	0.67	0.72	0.26	0.33	0	0	0.05	0.01	0.23	0.14	0.13	0.04	0.04	0
cis_mRNA_overlap	0	Lnc-CompleteIn-mRNAIntron	LTCONS_00173825	XM_011511172.2	chr2	99967339	99986198	18860	-	chr2	99545861	100105583	9465	-	*	0.9423	0.7028	0.25	0.22	0.33	0.17	2.81	1.14	0.67	0.72	0.26	0.33	0	0	0	0	0.05	0.03	0	0	0	0
cis_mRNA_overlap	0	Lnc-CompleteIn-mRNAIntron	LTCONS_00173825	XM_011511174.2	chr2	99967339	99986198	18860	-	chr2	99545861	100104704	9470	-	*	0.754	0.6854	0.25	0.22	0.33	0.17	2.81	1.14	0.67	0.72	0.26	0.33	0	0	0	0	0.06	0.08	0	0	0	0
cis_mRNA_overlap	0	Lnc-CompleteIn-mRNAIntron	LTCONS_00174134	NM_001039492.2	chr2	105375656	105377318	1663	-	chr2	105360826	105399118	1521	-	*	0.9797	0.6893	0.56	0	0.36	0.04	0.47	0.02	1.72	0.06	0	0.12	1.39	0.13	0.65	0.72	1.88	0.08	5.99	0	0	0
cis_mRNA_overlap	0	Lnc-CompleteIn-mRNAIntron	LTCONS_00174134	NM_001318895.1	chr2	105375656	105377318	1663	-	chr2	105360826	105399224	1755	-	*	0.9432	0.7746	0.56	0	0.36	0.04	0.47	0.02	1.72	0.06	0	0.12	0.86	0.12	0.38	0.32	0.62	0	1.45	0	0	0
cis_mRNA_overlap	0	Lnc-CompleteIn-mRNAIntron	LTCONS_00175767	NM_018557.2	chr2	141554433	141639279	84522	-	chr2	140231427	142131701	16531	-	*	0.9439	0.6813	0.01	0.01	0.2	0.03	1.16	0.03	0.02	0.01	0.09	0.16	0.05	0	0.49	0.21	1.14	0	0.03	0	0.01	0.05
cis_mRNA_overlap	0	Lnc-CompleteIn-mRNAIntron	LTCONS_00175767	XM_017004341.1	chr2	141554433	141639279	84522	-	chr2	140231423	142114489	21111	-	*	0.9968	0.901	0.01	0.01	0.2	0.03	1.16	0.03	0.02	0.01	0.09	0.16	0.02	0	0.32	0.1	1.76	0.01	0.01	0	0.24	0.21
cis_mRNA_dw20k	90	NA	LTCONS_00176941	NM_001008489.3	chr2	169701797	169717390	11832	-	chr2	169694454	169701708	1136	+	*	-0.6342	-0.7006	0	0	0	0.05	0	0	0	0	0	0.03	0.65	1.24	0.48	0.41	1.39	1.19	0.9	1.32	0.96	0.44
cis_mRNA_overlap	0	Lnc-AntiOverlap-mRNA	LTCONS_00177125	XM_011510999.2	chr2	170618628	170770768	40144	-	chr2	170770541	170798971	1091	+	*	0.6249	0.6378	0	0.01	0.02	0	0.05	0.04	0.03	0.04	0.01	0	0	0.58	0.1	0.1	0.4	1.1	0.25	1.18	0.49	0.18
cis_mRNA_up10k	688	NA	LTCONS_00177125	XM_011511001.2	chr2	170618628	170770768	40144	-	chr2	170771455	170798971	1866	+	*	0.8137	0.7893	0	0.01	0.02	0	0.05	0.04	0.03	0.04	0.01	0	0	0.04	0	0	0.42	0.14	0.14	0.15	0.04	0.07
cis_mRNA_overlap	0	Lnc-CompleteIn-mRNAIntron	LTCONS_00177778	NM_152520.4	chr2	179640223	179655437	15215	-	chr2	179441982	179861505	3288	-	*	0.7262	0.7198	0.24	0.15	0.77	0.39	0.06	0	0.64	0	0.03	0.8	0	0.23	0.38	0.41	0	0	0.44	0	0	0.16
cis_mRNA_overlap	0	Lnc-CompleteIn-mRNAIntron	LTCONS_00177778	XM_011510723.2	chr2	179640223	179655437	15215	-	chr2	179480831	179864550	4684	-	*	0.8776	0.7686	0.24	0.15	0.77	0.39	0.06	0	0.64	0	0.03	0.8	0.01	0.04	0.17	0.06	0	0.04	0.12	0	0.04	0.1
cis_mRNA_overlap	0	Lnc-CompleteIn-mRNAIntron	LTCONS_00177778	XM_017003438.1	chr2	179640223	179655437	15215	-	chr2	179441982	179751120	8087	-	*	0.9841	1	0.24	0.15	0.77	0.39	0.06	0	0.64	0	0.03	0.8	0.36	0.23	1.13	0.48	0.07	0	0.85	0	0.06	1.43
cis_mRNA_overlap	0	Lnc-CompleteIn-mRNAIntron	LTCONS_00177778	XM_017003440.1	chr2	179640223	179655437	15215	-	chr2	179441982	179864484	6124	-	*	0.7403	0.7028	0.24	0.15	0.77	0.39	0.06	0	0.64	0	0.03	0.8	0	0	0.01	0	0	0	0	0	0	0.02
cis_mRNA_overlap	0	Lnc-AntiOverlap-mRNA	LTCONS_00178217	NM_001161819.1	chr2	191209430	191246175	1567	-	chr2	191245528	191425389	4933	+	*	0.7226	0.6129	0	0.02	0.04	0	0.17	0	0	0.2	0	0	0	0.1	0.14	0.16	0.17	0	0	0.6	0.3	0
cis_mRNA_overlap	0	Lnc-CompleteIn-mRNAIntron	LTCONS_00178863	NM_003709.3	chr2	207120552	207122045	961	-	chr2	207074137	207166016	8433	-	*	0.7725	0.766	0.5	0.12	0.54	0.2	0.17	0.05	0.13	0	0.09	0.27	0.7	0.3	0.32	0.21	0.18	0.07	0.32	0.04	0.05	0.27
cis_mRNA_overlap	0	Lnc-AntiOverlap-mRNA	LTCONS_00179455	MTCONS_00165932	chr2	218752685	218755786	3102	-	chr2	218710835	218758634	8221	+	-4469.88	0.6943	0.6187	0.16	0.03	0.35	0.14	0.03	0.01	0.35	0.05	0.01	0.7	0.06	0.07	0.1	0.1	0	0	0	0	0	0.15
cis_mRNA_dw20k	2213	NA	LTCONS_00180914	NM_001034.3	chr2	10133631	10135889	2259	.	chr2	10122736	10131419	3266	+	*	0.9629	0.6462	0.03	0.02	0.02	0.02	0.12	1.08	0.05	0.19	0.02	0.03	1.02	3.16	0.6	0.46	3.82	31.05	0.66	13.56	0.93	0.33
cis_mRNA_dw20k	2213	NA	LTCONS_00180914	NM_001165931.1	chr2	10133631	10135889	2259	.	chr2	10122568	10131419	3434	+	*	0.9903	0.6962	0.03	0.02	0.02	0.02	0.12	1.08	0.05	0.19	0.02	0.03	0	0.12	0	0	0.16	1.34	0	0.35	0	0
tran	NA	NA	LTCONS_00181065	XM_017021052.1	chr2	68935285	68937056	1772	.	chr14	67470266	67489005	4296	-	-2816.18	0.9933	0.6603	0	0	0	0	0.02	0.56	0	0	0	0	0.05	0	0	0	0.05	0.64	0.06	0	0	0
cis_mRNA_dw20k	15545	NA	LTCONS_00181132	XM_011533139.1	chr2	85806927	85808158	1232	.	chr2	85753786	85791383	5921	+	*	0.6833	0.7594	0.06	0	0.16	0.02	0	0	0.33	0	0	0.01	0.02	0	0.03	0.01	0	0	0.02	0.01	0.01	0
cis_mRNA_dw20k	19775	NA	LTCONS_00181676	XM_011511699.2	chr2	234096908	234098698	1791	.	chr2	234050671	234077134	872	+	*	0.6808	0.6159	0.2	0.01	0.41	0.51	0.09	0.01	0.07	0.05	0.04	0.29	10.59	1.4	5.15	10.76	0	0.34	7.22	0	0.86	3.97
cis_mRNA_dw20k	19777	NA	LTCONS_00181676	NM_006944.2	chr2	234096908	234098698	1791	.	chr2	234050702	234077132	1019	+	*	0.7277	0.7416	0.2	0.01	0.41	0.51	0.09	0.01	0.07	0.05	0.04	0.29	154.67	22.97	97.22	128.78	9.85	1.3	78.6	4.92	23.83	62.39
cis_mRNA_dw20k	18499	NA	LTCONS_00181851	NM_001199786.1	chr20	1273410	1350479	1094	+	chr20	1368977	1393172	1520	-	*	0.8771	0.8159	0.05	0.22	0	0	0.1	0.31	0	0	0.1	0	0	0.25	0	0.13	0.2	0.6	0	0	0.25	0.18
cis_mRNA_overlap	0	Lnc-AntiOverlap-mRNA	LTCONS_00181853	NM_001199786.1	chr20	1273410	1379243	4914	+	chr20	1368977	1393172	1520	-	*	0.9335	0.8532	0.08	0.2	0.06	0.11	0.28	0.62	0.13	0.18	0.34	0.26	0	0.25	0	0.13	0.2	0.6	0	0	0.25	0.18
cis_mRNA_dw20k	2229	NA	LTCONS_00181856	NM_054014.3	chr20	1320710	1369484	35939	+	chr20	1371712	1393172	901	-	*	0.69	0.6322	0.18	0.22	0.35	0.2	0.84	2.47	0.36	1.45	0.32	0.79	0.86	0.75	1.94	0.67	1.94	2.38	1.2	3.54	0.51	0.61
cis_mRNA_overlap	0	Lnc-AntiOverlap-mRNA	LTCONS_00181856	NM_000801.4	chr20	1320710	1369484	35939	+	chr20	1368977	1393172	1633	-	*	0.8969	0.6242	0.18	0.22	0.35	0.2	0.84	2.47	0.36	1.45	0.32	0.79	13.44	13.6	10.88	10.41	24.03	40.73	13.95	26.61	18.84	8.81
cis_mRNA_overlap	0	Lnc-AntiOverlap-mRNA	LTCONS_00182014	NM_001009984.2	chr20	3406544	3412998	3583	+	chr20	3249302	3407662	6909	-	*	0.8211	0.6065	0.05	0	0.03	0.04	0.06	0.11	0	0.25	0	0	1.3	1.55	1.18	0.93	2.66	3.14	1.31	3.32	1.11	1.08
cis_mRNA_overlap	0	Lnc-CompleteIn-mRNAIntron	LTCONS_00182258	MTCONS_00182251	chr20	8248209	8252457	3583	+	chr20	8114409	8884911	6897	+	*	0.9223	0.8951	0.16	0.38	0.36	0.16	1.88	1.92	0.31	0.74	0.52	0.36	0	2.9	0	0	5.73	6.9	0.31	1.49	2.98	0.18
cis_mRNA_overlap	0	Lnc-CompleteIn-mRNAIntron	LTCONS_00182258	XM_011529199.2	chr20	8248209	8252457	3583	+	chr20	8132305	8792556	4242	+	*	0.8335	0.8171	0.16	0.38	0.36	0.16	1.88	1.92	0.31	0.74	0.52	0.36	0.08	0.53	0.42	0.3	1.11	3.21	0.28	0.43	0.37	0
cis_mRNA_overlap	0	Lnc-CompleteIn-mRNAIntron	LTCONS_00182258	XM_017027752.1	chr20	8248209	8252457	3583	+	chr20	8132305	8792790	3974	+	*	0.9247	0.7615	0.16	0.38	0.36	0.16	1.88	1.92	0.31	0.74	0.52	0.36	0.23	0.18	0	0.04	2.26	1.62	0	0.84	0.69	0.82
cis_mRNA_overlap	0	Lnc-CompleteIn-mRNAIntron	LTCONS_00182262	MTCONS_00182251	chr20	8501959	8513463	11505	+	chr20	8114409	8884911	6897	+	*	0.9079	0.8247	0.26	0.52	0.52	0.24	3.75	3.7	0.49	1.23	0.93	0.87	0	2.9	0	0	5.73	6.9	0.31	1.49	2.98	0.18
cis_mRNA_overlap	0	Lnc-CompleteIn-mRNAIntron	LTCONS_00182262	XM_011529199.2	chr20	8501959	8513463	11505	+	chr20	8132305	8792556	4242	+	*	0.8131	0.6626	0.26	0.52	0.52	0.24	3.75	3.7	0.49	1.23	0.93	0.87	0.08	0.53	0.42	0.3	1.11	3.21	0.28	0.43	0.37	0
cis_mRNA_overlap	0	Lnc-CompleteIn-mRNAIntron	LTCONS_00182262	XM_017027752.1	chr20	8501959	8513463	11505	+	chr20	8132305	8792790	3974	+	*	0.9446	0.8384	0.26	0.52	0.52	0.24	3.75	3.7	0.49	1.23	0.93	0.87	0.23	0.18	0	0.04	2.26	1.62	0	0.84	0.69	0.82
cis_mRNA_overlap	0	Lnc-CompleteIn-mRNAIntron	LTCONS_00182839	NM_018474.4	chr20	21205851	21206559	709	+	chr20	21125983	21246622	2201	+	*	0.7923	0.6869	0.19	0.22	0.05	0	0.8	0.89	0.28	1.13	0.23	0.8	2.29	1.75	2.81	1.26	3.25	5.81	1.73	4.84	1.96	2.48
cis_mRNA_overlap	0	Lnc-AntiOverlap-mRNA	LTCONS_00183147	XM_006723558.3	chr20	25624014	25684202	21957	+	chr20	25674213	25692648	4273	-	*	0.9165	0.9152	0.05	0.08	0.32	0.1	1.12	2.32	0.39	1.64	0.13	0.46	0.42	0.62	0.95	0.13	1	2.64	0.79	2.13	0.84	1.43
cis_mRNA_overlap	0	Lnc-AntiOverlap-mRNA	LTCONS_00183147	XM_017027802.1	chr20	25624014	25684202	21957	+	chr20	25674215	25688606	5166	-	*	0.9635	0.8788	0.05	0.08	0.32	0.1	1.12	2.32	0.39	1.64	0.13	0.46	0.48	0.7	0.96	0.41	1.48	2.73	0.93	2.8	0.56	0.83
cis_mRNA_up10k	3	NA	LTCONS_00183147	NM_152667.2	chr20	25624014	25684202	21957	+	chr20	25612935	25624012	3801	-	*	0.9507	0.6606	0.05	0.08	0.32	0.1	1.12	2.32	0.39	1.64	0.13	0.46	1.4	1.48	1.5	0.98	2.56	6.03	1.43	3.44	1.59	1.14
cis_mRNA_dw20k	162	NA	LTCONS_00183795	NM_004139.4	chr20	38377172	38390682	13336	+	chr20	38346411	38377011	1894	+	*	0.8	0.7455	1.15	1.62	2.07	0.94	1.83	0.34	7.92	0.21	0.59	4.88	202.83	377.12	165.26	119.68	407.43	153.42	587.65	21.22	206.16	315.45
cis_mRNA_dw20k	4804	NA	LTCONS_00184211	NM_001322799.1	chr20	45085475	45086411	937	+	chr20	45091214	45101112	5432	-	*	0.7406	0.6477	0.38	0.05	0.26	0.39	0.14	0.35	0.71	0.07	0.05	0.17	0.01	0	0	0	0	0.01	0.01	0	0	0
cis_mRNA_dw20k	6422	NA	LTCONS_00184211	XM_017028032.1	chr20	45085475	45086411	937	+	chr20	44966531	45079054	5498	+	*	0.7946	0.6247	0.38	0.05	0.26	0.39	0.14	0.35	0.71	0.07	0.05	0.17	0.06	0	0	0	0	0	0.09	0	0	0
cis_mRNA_overlap	0	Lnc-Overlap-mRNA	LTCONS_00184888	XM_017027640.1	chr20	52972309	53036636	64274	+	chr20	52972309	53444275	4123	+	*	0.8413	0.8545	1.01	0.17	4.11	0.61	3.97	0.09	5.18	1.58	0.33	1.63	1.56	0.65	2.39	1.45	4.87	0.19	3.22	1.39	0.75	0.95
cis_mRNA_up10k	3850	NA	LTCONS_00185102	MTCONS_00185104	chr20	57555905	57557232	1328	+	chr20	57561081	57566461	3038	+	*	0.7072	0.7333	1.6	0.16	1.34	1.18	0.02	0.5	0.93	0.07	0.87	3.2	97.56	48.29	54.85	88.57	15.51	37.81	119.09	6.43	104.93	114.21
cis_mRNA_up10k	4194	NA	LTCONS_00185102	XM_011528839.1	chr20	57555905	57557232	1328	+	chr20	57561425	57566461	2331	+	*	0.6393	0.7333	1.6	0.16	1.34	1.18	0.02	0.5	0.93	0.07	0.87	3.2	32.99	10.19	13.34	13.59	3.48	2.98	43.86	0.91	18.18	32.1
cis_mRNA_overlap	0	Lnc-Overlap-mRNA	LTCONS_00185279	XM_011528985.2	chr20	59940389	59949561	653	+	chr20	59940415	59948680	5076	+	-341.8	0.6158	0.697	0.14	0.06	0.32	0	0.54	1.29	0.33	0.23	0.73	0.2	0.29	0.07	0.39	0.04	0.37	0.68	0.25	0.81	0.52	0.33
cis_mRNA_overlap	0	Lnc-CompleteIn-mRNAIntron	LTCONS_00185533	XM_017027827.1	chr20	62652681	62653439	759	+	chr20	62642448	62672293	4570	+	*	0.6892	0.8823	0.03	0	0.25	0.47	0.05	0.09	0.13	0	0.03	0	0.08	0	0.12	0.28	0.04	0.28	0.26	0	0	0
cis_mRNA_overlap	0	Lnc-Overlap-mRNA	LTCONS_00185650	NM_024299.2	chr20	63520773	63522206	480	+	chr20	63520780	63522171	777	+	-329.15	0.8435	0.7306	0.17	0	0	0	2.87	1.82	0.14	1.74	0	0	1.25	0.85	1.49	1.97	4.63	4.76	1.52	7.27	0.86	0.38
cis_mRNA_overlap	0	Lnc-CompleteIn-mRNAIntron	LTCONS_00185773	XM_011529022.1	chr20	64062515	64064130	1083	+	chr20	64042350	64072347	3581	+	*	0.6686	0.6854	0.18	0.4	0.19	0.1	0.03	1.24	0.13	0.04	0.05	0.04	0	0.08	0	0	0	0.05	0	0	0	0
cis_mRNA_overlap	0	Lnc-CompleteIn-mRNAIntron	LTCONS_00185784	NM_000913.5	chr20	64081123	64083438	2316	+	chr20	64080082	64100643	3261	+	*	0.954	0.6575	0.04	0.03	0.05	0.02	0.03	1.13	0.05	0.05	0.01	0.11	0.2	0	0.13	0.06	0.07	0.71	0.09	0.01	0.07	0.21
cis_mRNA_overlap	0	Lnc-AntiCompleteIn-mRNAIntron	LTCONS_00186044	NM_003245.3	chr20	2316269	2317670	666	-	chr20	2295967	2341079	2677	+	*	0.7431	0.8793	0	0	0	0	1.08	0.05	0	0.44	4.64	0	0.03	0.18	0.03	0.04	12.88	0.36	0.05	2.98	10.52	0.04
cis_mRNA_dw20k	5092	NA	LTCONS_00186053	NM_001321800.1	chr20	2475835	2476726	892	-	chr20	2481817	2508915	3496	-	*	0.7914	0.6954	0.09	0.03	0.14	0	0.34	0.83	0.07	0.82	0.23	0.09	1.18	0	0.17	0	0.33	1.31	0.39	1.53	0.32	0
cis_mRNA_dw20k	5092	NA	LTCONS_00186053	NM_001321802.1	chr20	2475835	2476726	892	-	chr20	2481817	2509132	3752	-	*	0.7381	0.7774	0.09	0.03	0.14	0	0.34	0.83	0.07	0.82	0.23	0.09	0	0.01	0.16	0.13	0.3	0.86	0	0.59	0.9	0.19
cis_mRNA_dw20k	5092	NA	LTCONS_00186053	NM_001321803.1	chr20	2475835	2476726	892	-	chr20	2481817	2508915	3616	-	*	0.9276	0.6809	0.09	0.03	0.14	0	0.34	0.83	0.07	0.82	0.23	0.09	0	0.1	0.07	0	0.38	0.61	0	0.48	0	0
cis_mRNA_up10k	4983	NA	LTCONS_00186053	NM_003091.3	chr20	2475835	2476726	892	-	chr20	2461635	2470853	1153	-	*	0.7464	0.6018	0.09	0.03	0.14	0	0.34	0.83	0.07	0.82	0.23	0.09	19.01	28.33	15.33	14.48	17.94	82.12	11.45	30.51	28.14	13.08
cis_mRNA_dw20k	8041	NA	LTCONS_00186089	NM_080841.2	chr20	3046709	3049165	2457	-	chr20	2923207	3038669	3136	+	*	0.6533	0.6013	0.02	0	0	0.01	0.02	0.77	0.12	0.01	0.11	0.11	1.77	0.57	1.4	1.13	1.31	2.96	2.13	0	2.34	0.45
cis_mRNA_dw20k	2028	NA	LTCONS_00186192	NM_001258429.1	chr20	3750153	3751472	1320	-	chr20	3753499	3767805	1313	-	*	0.8731	0.8766	0	0.04	0	0	0.05	0.72	0	0.15	0	0	3.25	6.42	3.6	3.25	6.32	18.15	2.71	14.59	4.76	2.75
cis_mRNA_up10k	4853	NA	LTCONS_00187384	XM_017027802.1	chr20	25693458	25696411	2954	-	chr20	25674215	25688606	5166	-	*	0.985	0.9394	0.52	0.64	0.65	0.35	1.02	2.05	0.8	2.41	0.43	0.81	0.48	0.7	0.96	0.41	1.48	2.73	0.93	2.8	0.56	0.83
cis_mRNA_up10k	811	NA	LTCONS_00187384	XM_006723558.3	chr20	25693458	25696411	2954	-	chr20	25674213	25692648	4273	-	*	0.9055	0.8788	0.52	0.64	0.65	0.35	1.02	2.05	0.8	2.41	0.43	0.81	0.42	0.62	0.95	0.13	1	2.64	0.79	2.13	0.84	1.43
cis_mRNA_dw20k	10021	NA	LTCONS_00187572	NM_004798.3	chr20	32345031	32357105	11477	-	chr20	32277651	32335011	6116	+	*	0.8233	0.7006	0	0	0	0	0	0.02	0	0.01	0	0	7.66	6.18	6.44	5.47	11.7	14.86	8.05	13.44	5.56	8.11
cis_mRNA_overlap	0	Lnc-AntiOverlap-mRNA	LTCONS_00187572	MTCONS_00183366	chr20	32345031	32357105	11477	-	chr20	32352675	32439319	14160	+	*	0.8302	0.7028	0	0	0	0	0	0.02	0	0.01	0	0	0.07	0.04	0.12	0.04	0.06	0.25	0.16	0.2	0.02	0.09
cis_mRNA_up10k	1240	NA	LTCONS_00187572	NM_001164603.1	chr20	32345031	32357105	11477	-	chr20	32358344	32372549	1070	+	*	0.7784	0.6228	0	0	0	0	0	0.02	0	0.01	0	0	0.43	0.18	1.16	0.29	1.19	2.34	1.33	1.27	0.15	0.51
cis_mRNA_up10k	1249	NA	LTCONS_00187572	MTCONS_00183373	chr20	32345031	32357105	11477	-	chr20	32358353	32439319	7499	+	*	0.7704	0.7006	0	0	0	0	0	0.02	0	0.01	0	0	0.7	0.57	1.35	0.69	1.89	2.61	1.68	2.25	0.61	1.01
cis_mRNA_up10k	1815	NA	LTCONS_00187572	XM_011528648.2	chr20	32345031	32357105	11477	-	chr20	32358919	32438416	6060	+	*	0.7971	0.7005	0	0	0	0	0	0.02	0	0.01	0	0	0.07	0.05	0	0.01	0	0.14	0.05	0.17	0	0.05
cis_mRNA_up10k	1961	NA	LTCONS_00187572	XM_006723732.2	chr20	32345031	32357105	11477	-	chr20	32359065	32439319	6667	+	*	0.956	0.7006	0	0	0	0	0	0.02	0	0.01	0	0	1.24	1.55	1.11	0.41	1.48	5.31	1.17	2.46	1.5	1.15
cis_mRNA_up10k	2149	NA	LTCONS_00187572	XM_017027704.1	chr20	32345031	32357105	11477	-	chr20	32359253	32438416	7201	+	*	0.6471	0.6833	0	0	0	0	0	0.02	0	0.01	0	0	0.64	0.65	0.8	0.14	1.03	1.87	1.85	2.2	0	0.89
cis_mRNA_up10k	5167	NA	LTCONS_00187826	MTCONS_00187823	chr20	35606730	35607980	1251	-	chr20	35558739	35601564	5627	-	*	0.9181	0.6852	0.02	0.04	0.02	0	0.23	0.08	0.02	0.89	0.06	0	0.2	0.2	0.12	0.04	0.29	0.05	0.19	1.69	0.73	0.06
cis_mRNA_up10k	8364	NA	LTCONS_00187826	XM_005260520.4	chr20	35606730	35607980	1251	-	chr20	35616343	35621045	1103	+	*	0.9734	0.8555	0.02	0.04	0.02	0	0.23	0.08	0.02	0.89	0.06	0	0.28	0.7	0.07	0.15	2.14	1.52	0.57	11.68	3.14	0.44
cis_mRNA_up10k	8509	NA	LTCONS_00187826	MTCONS_00183596	chr20	35606730	35607980	1251	-	chr20	35616488	35621356	1992	+	*	0.8499	0.7994	0.02	0.04	0.02	0	0.23	0.08	0.02	0.89	0.06	0	0.33	0.74	0.15	0.25	0.52	0.69	0.25	3.22	1.94	0.24
cis_mRNA_up10k	469	NA	LTCONS_00187827	XM_005260520.4	chr20	35613604	35615875	2272	-	chr20	35616343	35621045	1103	+	*	0.9604	0.6322	0.07	0.09	0.01	0.03	0.11	0.08	0.06	1.1	0.02	0.01	0.28	0.7	0.07	0.15	2.14	1.52	0.57	11.68	3.14	0.44
cis_mRNA_up10k	614	NA	LTCONS_00187827	MTCONS_00183596	chr20	35613604	35615875	2272	-	chr20	35616488	35621356	1992	+	*	0.8417	0.7012	0.07	0.09	0.01	0.03	0.11	0.08	0.06	1.1	0.02	0.01	0.33	0.74	0.15	0.25	0.52	0.69	0.25	3.22	1.94	0.24
cis_mRNA_dw20k	3850	NA	LTCONS_00188164	NM_003286.2	chr20	41128336	41138004	5539	-	chr20	41028822	41124487	3734	+	*	0.7759	0.6786	0	0	0.05	0	0	0.1	0	0.16	0	0	4.87	4.12	7.38	5.62	10.65	14.05	9.96	13.87	5.92	5.25
cis_mRNA_overlap	0	Lnc-AntiOverlap-mRNA	LTCONS_00188164	NM_002660.2	chr20	41128336	41138004	5539	-	chr20	41137521	41175717	5205	+	*	0.8248	0.7382	0	0	0.05	0	0	0.1	0	0.16	0	0	2.46	1.92	2.95	2.52	3.61	13.69	2.38	9.04	1.85	1.06
cis_mRNA_overlap	0	Lnc-AntiOverlap-mRNA	LTCONS_00188164	NM_182811.1	chr20	41128336	41138004	5539	-	chr20	41137521	41175717	5202	+	*	0.7719	0.6786	0	0	0.05	0	0	0.1	0	0.16	0	0	1.17	0.09	1.18	0.27	2.03	4.18	0.71	2.94	0.29	1.25
cis_mRNA_overlap	0	Lnc-AntiOverlap-mRNA	LTCONS_00188164	XM_011528865.1	chr20	41128336	41138004	5539	-	chr20	41137732	41175721	5193	+	*	0.9145	0.6133	0	0	0.05	0	0	0.1	0	0.16	0	0	0.03	0	0	0.02	0	0.15	0	0.51	0	0
cis_mRNA_overlap	0	Lnc-AntiOverlap-mRNA	LTCONS_00188164	XM_011528867.2	chr20	41128336	41138004	5539	-	chr20	41137521	41172506	2966	+	*	0.8063	0.6147	0	0	0.05	0	0	0.1	0	0.16	0	0	0	0	0	0	0	0.16	0.2	0.37	0	0
cis_mRNA_up10k	7184	NA	LTCONS_00188252	NM_016276.3	chr20	43558338	43558914	577	-	chr20	43566097	43585633	2120	+	*	0.9129	0.7066	0	0.05	0	0	0.07	1.8	0.18	0.13	0	0.17	1.34	0.57	2.8	0.53	1.29	13.57	6.77	4.09	0.65	1.77
cis_mRNA_up10k	82	NA	LTCONS_00188252	NM_170693.2	chr20	43558338	43558914	577	-	chr20	43558995	43585633	1909	+	*	0.9916	0.7879	0	0.05	0	0	0.07	1.8	0.18	0.13	0	0.17	13.37	6.88	10.92	11.51	11.93	135.33	34.32	18.39	9.34	17.27
cis_mRNA_dw20k	16080	NA	LTCONS_00188500	NM_022095.3	chr20	45926542	45932574	6033	-	chr20	45948653	45972194	4452	-	*	0.8302	0.6018	0.14	0.09	0.07	0.06	0.08	0.86	0.12	0.47	0.08	0.15	1.49	1.09	1.4	1.01	3.14	4.57	2.55	3.55	1.35	1.31
cis_mRNA_overlap	0	Lnc-AntiCompleteIn-mRNAExon	LTCONS_00189222	MTCONS_00185104	chr20	57565689	57565994	306	-	chr20	57561081	57566461	3038	+	-626.6	0.6966	0.7424	1.19	0.27	0.45	1.39	0	0	0.46	0	0.78	0.56	97.56	48.29	54.85	88.57	15.51	37.81	119.09	6.43	104.93	114.21
cis_mRNA_overlap	0	Lnc-AntiCompleteIn-mRNAExon	LTCONS_00189222	NM_002591.3	chr20	57565689	57565994	306	-	chr20	57561081	57566457	2685	+	-626.6	0.6119	0.7669	1.19	0.27	0.45	1.39	0	0	0.46	0	0.78	0.56	711.91	631.71	248.95	427.05	80.63	54.54	407.93	16.48	869.96	831.21
cis_mRNA_overlap	0	Lnc-AntiOverlap-mRNA	LTCONS_00189807	MTCONS_00185777	chr20	64065545	64067177	1633	-	chr20	64065872	64072347	1456	+	-1659.11	0.9478	0.8211	0.04	0	0.02	0.06	0.76	0	0.11	0	0	0	4.85	0.75	5.29	4.99	19.25	0.45	2.05	0.1	0.66	0.46
cis_mRNA_overlap	0	Lnc-AntiOverlap-mRNA	LTCONS_00189807	XM_011529027.2	chr20	64065545	64067177	1633	-	chr20	64042350	64072347	2025	+	*	0.9823	0.7065	0.04	0	0.02	0.06	0.76	0	0.11	0	0	0	0.19	0	0.16	0.08	1.65	0	0	0	0	0
cis_mRNA_dw20k	2280	NA	LTCONS_00190019	MTCONS_00183867	chr20	39042002	39043684	1683	.	chr20	38962338	39039723	4784	+	*	0.9872	0.8599	0.01	0.03	0.03	0.03	0.07	0.35	0.04	0.11	0.03	0.03	0.72	0.87	1.06	1.12	1.64	4.03	0.98	2.03	0.89	0.83
cis_mRNA_overlap	0	Lnc-AntiOverlap-mRNA	LTCONS_00191184	XM_006724066.1	chr21	32728106	32737473	3949	+	chr21	32733899	32771787	3819	-	*	0.6257	0.6307	0.04	0.17	0.06	0	0.02	0.26	0	0.05	0	0.06	0.35	0.47	0	0.25	0	0.68	0	0.79	0	0.35
cis_mRNA_up10k	168	NA	LTCONS_00191184	NM_001160306.1	chr21	32728106	32737473	3949	+	chr21	32628759	32727939	6942	-	*	0.7088	0.6647	0.04	0.17	0.06	0	0.02	0.26	0	0.05	0	0.06	0.67	0.4	0.62	0.44	0.15	1.04	0.1	0.29	0	0.64
cis_mRNA_up10k	52	NA	LTCONS_00191187	XM_017028495.1	chr21	32728106	32747072	12649	+	chr21	32628763	32728055	7071	-	*	0.8281	0.8408	0	0	0	0	0.02	0	0.03	0.06	0	0	0	0	0	0	0	0	0.18	0.14	0	0
cis_mRNA_up10k	52	NA	LTCONS_00191187	XM_017028499.1	chr21	32728106	32747072	12649	+	chr21	32628763	32728055	6945	-	*	0.8389	0.7979	0	0	0	0	0.02	0	0.03	0.06	0	0	0	0.15	0.39	0.42	1.07	0.35	0.6	1.28	0.53	0.29
cis_mRNA_overlap	0	Lnc-CompleteIn-mRNAIntron	LTCONS_00191763	NM_012105.4	chr21	41168738	41173574	4837	+	chr21	41167801	41282534	8930	+	*	0.8043	0.693	0.84	0.02	1.08	0.11	0.37	0.07	0.52	0.2	0.12	0.26	0.95	0.07	0.61	0.1	0.04	0.12	0.81	0.14	0.14	0.26
cis_mRNA_overlap	0	Lnc-CompleteIn-mRNAIntron	LTCONS_00191763	NM_138992.2	chr21	41168738	41173574	4837	+	chr21	41167801	41282534	8761	+	*	0.6027	0.6935	0.84	0.02	1.08	0.11	0.37	0.07	0.52	0.2	0.12	0.26	0.24	0	0.1	0	0.23	0	0	0	0	0
cis_mRNA_overlap	0	Lnc-CompleteIn-mRNAIntron	LTCONS_00191764	NM_012105.4	chr21	41173697	41179152	5456	+	chr21	41167801	41282534	8930	+	*	0.7699	0.6018	0.43	0.02	0.64	0.1	0.34	0.06	0.46	0.09	0.04	0.18	0.95	0.07	0.61	0.1	0.04	0.12	0.81	0.14	0.14	0.26
cis_mRNA_up10k	387	NA	LTCONS_00192030	XM_011529474.2	chr21	43427512	43437781	8862	+	chr21	43414490	43427126	4588	-	*	0.809	0.8408	0	0	0	0	0.08	0.1	0	0	0.09	0	0	0	0	0	0	0.14	0	0	0.17	0
cis_mRNA_up10k	158	NA	LTCONS_00192452	XM_006724004.3	chr21	46228977	46254306	4701	+	chr21	46209632	46228820	1423	-	*	0.9072	0.8524	0	0.02	0	0	0	0.11	0	0	0.09	0.04	0.07	0.1	0.16	0	0	0.31	0	0	0.35	0.19
tran	NA	NA	LTCONS_00192742	XM_011546267.2	chr21	9068359	9129760	1468	-	chrUn_KI270744v1	80245	80716	472	+	-341.9	0.729	0.6575	0.09	0.21	0	0.08	0.11	0.82	0.23	0	0.69	0.3	0	0.49	0.08	0	0.09	2.57	0.03	0.09	0.14	0.82
cis_mRNA_overlap	0	Lnc-Overlap-mRNA	LTCONS_00192903	XM_011529748.2	chr21	14836763	15065903	1610	-	chr21	14961235	15064978	8286	-	*	0.6134	0.6139	0	0	0.22	0	0	0	0.18	0	0	0	0	0	0.45	0.1	0	0	0.07	0.31	0	0
cis_mRNA_up10k	8825	NA	LTCONS_00193817	MTCONS_00193777	chr21	36069642	36156323	14446	-	chr21	36034541	36060818	5231	-	*	0.6188	0.6854	0	0	0	0	0.01	0.02	0	0	0	0	0.25	0.09	0.19	0.22	0.74	0.45	0.43	0.29	0.29	0.13
cis_mRNA_up10k	9279	NA	LTCONS_00193817	NM_001007261.2	chr21	36069642	36156323	14446	-	chr21	36043684	36060364	1261	-	*	0.9167	0.7016	0	0	0	0	0.01	0.02	0	0	0	0	0.06	0.09	0	0	0.08	0.38	0	0	0	0
cis_mRNA_up10k	9377	NA	LTCONS_00193817	XM_011529638.2	chr21	36069642	36156323	14446	-	chr21	36034541	36060266	3305	-	*	0.7856	0.6266	0	0	0	0	0.01	0.02	0	0	0	0	0.04	0.04	0.16	0.1	0.22	0.37	0.07	0.25	0	0
cis_mRNA_up10k	8825	NA	LTCONS_00193821	XM_011529643.1	chr21	36069642	36175815	8202	-	chr21	36034541	36060818	3377	-	*	0.7936	0.6736	0.02	0.02	0.01	0	0	0.05	0	0.03	0.02	0	0.04	0.13	0.09	0.24	0	0.58	0.07	0.26	0.13	0.02
tran	NA	NA	LTCONS_00193821	XM_017004255.1	chr21	36069642	36175815	8202	-	chr2	31867823	32010730	1470	-	-2812.93	0.659	0.7096	0.02	0.02	0.01	0	0	0.05	0	0.03	0.02	0	3.08	6.13	3.92	2.79	2.82	6.38	3.49	7.58	8.42	4.44
cis_mRNA_dw20k	318	NA	LTCONS_00194831	MTCONS_00192501	chr21	46300426	46323899	7637	-	chr21	46286056	46300109	4035	+	*	0.9799	0.6068	0.07	0	0.05	0.02	0.14	1.98	0.03	0.34	0.01	0.06	0	0	0.04	0	0	0.21	0	0.04	0	0
cis_mRNA_overlap	0	Lnc-Overlap-mRNA	LTCONS_00194831	XM_017028390.1	chr21	46300426	46323899	7637	-	chr21	46300426	46323886	4036	-	-2704.94	0.9938	0.6622	0.07	0	0.05	0.02	0.14	1.98	0.03	0.34	0.01	0.06	0.02	0.02	0	0	0.02	0.3	0	0.07	0	0
cis_mRNA_overlap	0	mRNA-CompleteIn-LncExon	LTCONS_00194831	XM_011529621.2	chr21	46300426	46323899	7637	-	chr21	46300426	46323886	3687	-	-2582.92	0.9819	0.7006	0.07	0	0.05	0.02	0.14	1.98	0.03	0.34	0.01	0.06	0	0	0	0	0	0.06	0	0.02	0	0
cis_mRNA_up10k	224	NA	LTCONS_00194831	NM_006031.5	chr21	46300426	46323899	7637	-	chr21	46324122	46445769	10560	+	*	0.8889	0.6727	0.07	0	0.05	0.02	0.14	1.98	0.03	0.34	0.01	0.06	0.53	0.76	1.01	0.46	0.91	2.86	1.35	1.52	0.32	1.18
cis_mRNA_up10k	990	NA	LTCONS_00194831	NM_001315529.1	chr21	46300426	46323899	7637	-	chr21	46324888	46445769	10485	+	*	0.6369	0.6748	0.07	0	0.05	0.02	0.14	1.98	0.03	0.34	0.01	0.06	0.16	0.1	0	0	0.34	0.36	0.01	0.2	0.18	0.11
tran	NA	NA	LTCONS_00195783	MTCONS_00173333	chr22	22298098	22319876	3608	+	chr2	94191186	94208368	7270	-	-1859.95	0.9278	0.9273	1.25	1.66	1.6	1.18	5.84	2.84	1.92	4.07	2.8	1.46	0.13	0.3	0.48	0.22	1.9	1.31	0.7	1.27	0.49	0.45
cis_mRNA_up10k	1741	NA	LTCONS_00198113	XM_017028909.1	chr22	46738643	46740493	1851	+	chr22	46684410	46736903	4242	-	*	0.6938	0.7477	0.09	0.25	0	0.04	0.67	0.6	0.06	0.68	0.1	0.07	6.83	5.49	3.86	3.34	7.6	8.87	7.6	10.38	8.09	6.24
cis_mRNA_dw20k	2997	NA	LTCONS_00198431	XM_017028793.1	chr22	50526468	50529874	3407	+	chr22	50508233	50523472	2075	+	*	0.8363	0.6848	0.21	0.26	0.25	0.13	0.36	1.27	0.09	0.61	0.11	0.4	2.83	3.43	3.22	2.23	6.34	8.24	1.76	6.09	3.07	1.83
cis_mRNA_dw20k	6707	NA	LTCONS_00198431	NM_014551.4	chr22	50526468	50529874	3407	+	chr22	50508216	50519762	1425	+	*	0.9114	0.7455	0.21	0.26	0.25	0.13	0.36	1.27	0.09	0.61	0.11	0.4	1.01	1.6	2.16	1.24	3.54	6.26	0.56	4.31	1.94	1.44
tran	NA	NA	LTCONS_00198500	MTCONS_00187462	chr22	10939407	10941248	1842	-	chr20	28579208	28602730	4499	-	-749.06	0.9259	0.7416	0.28	5.96	0.31	0.2	0.83	6.77	0.48	0.38	5.61	0.46	0.72	4.39	1.47	0.71	1.23	2.93	1.23	0.87	3.32	0.6
tran	NA	NA	LTCONS_00198501	MTCONS_00187464	chr22	10949218	10960425	342	-	chr20	28579208	28602731	3588	-	-188.64	-0.6253	-0.7234	0.56	1.98	1	1.46	1.11	1.59	0.26	1.74	1.38	0	1.43	0.67	1.32	0.82	1.43	1.07	1.26	0.99	1.03	1.11
cis_mRNA_dw20k	1275	NA	LTCONS_00198942	MTCONS_00198943	chr22	20953360	20954713	1354	-	chr22	20955987	20957223	1237	-	*	0.9946	0.7742	0.02	0.1	0	0	0	0.77	0	1.06	0.02	0	0	0	0	0	0	0.46	0	0.72	0.02	0
cis_mRNA_dw20k	19436	NA	LTCONS_00199937	XM_017028668.1	chr22	30906074	30907176	1103	-	chr22	30926611	30968497	4009	-	*	0.6619	0.7346	0.02	0.04	0.11	0.06	0.15	0.15	0	0.7	0.04	0.03	0	0.27	1.06	0	1.49	0.29	0.05	1.45	0.72	0
cis_mRNA_overlap	0	Lnc-AntiOverlap-mRNA	LTCONS_00199937	NM_030758.3	chr22	30906074	30907176	1103	-	chr22	30694806	30907824	4340	+	-2387.78	0.6553	0.8147	0.02	0.04	0.11	0.06	0.15	0.15	0	0.7	0.04	0.03	0	0	0.14	0.07	0.11	0.77	0	0.6	0.2	0
cis_mRNA_overlap	0	Lnc-AntiOverlap-mRNA	LTCONS_00199937	XM_011530059.2	chr22	30906074	30907176	1103	-	chr22	30694880	30907823	4080	+	-2385.74	0.9605	0.8102	0.02	0.04	0.11	0.06	0.15	0.15	0	0.7	0.04	0.03	0	0	0	0	0.13	0.04	0	0.32	0	0
cis_mRNA_up10k	824	NA	LTCONS_00201123	XM_011529833.1	chr22	45133015	45163857	7674	-	chr22	45164680	45188011	5301	+	*	0.615	0.7301	0.68	0.97	0.49	0.3	1.69	3.61	1.33	1.91	0.51	1.21	0.15	0.05	0	0	0.07	0.26	0.32	0.13	0	0.21
tran	NA	NA	LTCONS_00201123	NM_001036645.1	chr22	45133015	45163857	7674	-	chr1	70354810	70368023	900	+	-1012.08	0.8747	0.7056	0.68	0.97	0.49	0.3	1.69	3.61	1.33	1.91	0.51	1.21	0.09	0.14	0	0	0	1.02	0.41	0.27	0.13	0.17
cis_mRNA_overlap	0	Lnc-AntiOverlap-mRNA	LTCONS_00201230	XM_011530243.2	chr22	46161042	46172355	634	-	chr22	46171149	46236898	3311	+	*	0.7239	0.7457	0	0.13	0.05	0	0.4	0.11	0	0	0.88	0	0	0.3	0.35	0.04	1.09	0.17	0.05	0.97	1.13	0
cis_mRNA_overlap	0	Lnc-AntiOverlap-mRNA	LTCONS_00201244	NM_017931.2	chr22	46268312	46268980	669	-	chr22	46267964	46294008	2610	+	*	-0.9468	-0.6829	0.12	0.12	0.23	0.04	0.05	1.38	0	0.72	0.04	0.24	30.32	34.7	27.41	25.25	28.16	0	36.36	17.22	35.85	29.54
cis_mRNA_overlap	0	Lnc-Overlap-mRNA	LTCONS_00201365	NM_001289922.2	chr22	49612657	49631327	12608	-	chr22	49620456	49657542	1719	-	*	0.6403	0.7593	0.06	0.02	0.09	0.06	0.11	0.06	0.15	0.01	0	0.08	0.12	0.03	0.21	0.21	0.3	0.1	0.13	0.03	0.05	0.08
cis_mRNA_overlap	0	Lnc-Overlap-mRNA	LTCONS_00201365	XM_011530167.2	chr22	49612657	49631327	12608	-	chr22	49621177	49625609	3690	-	*	0.8198	0.7816	0.06	0.02	0.09	0.06	0.11	0.06	0.15	0.01	0	0.08	0.03	0.01	0.13	0.04	0.18	0.02	0.17	0.06	0.01	0.05
tran	NA	NA	LTCONS_00201876	NM_001084392.1	chr22_KI270879v1_alt	199283	204161	4879	-	chr22	23971365	23974491	620	-	-903.04	0.8084	0.9192	2.58	1.54	2.01	0.15	0.58	0	0	0	0	0.79	136.48	193.43	125.77	80.67	78.59	60.53	66.08	38.94	39.5	101.24
cis_mRNA_overlap	0	mRNA-CompleteIn-LncExon	LTCONS_00202059	NM_001276325.1	chr3	4303304	4314402	2070	+	chr3	4303304	4314402	1728	+	-850.71	0.6416	0.6055	0	0.08	0.08	0	0	0.12	0	0.12	0	0	0.28	0.21	0.24	0.13	0.3	0.31	0.11	0.6	0.16	0.22
cis_mRNA_dw20k	13733	NA	LTCONS_00202402	XM_017007344.1	chr3	9947359	9962636	8309	+	chr3	9917097	9933627	2338	+	*	-0.6552	-0.7099	0.02	0	0.11	0	0.13	0.15	0.04	0.18	0.02	0.01	0	0.69	0.19	0.81	0	0	0.55	0.04	0.17	0.28
cis_mRNA_dw20k	13733	NA	LTCONS_00202402	XM_017007349.1	chr3	9947359	9962636	8309	+	chr3	9917098	9933627	2256	+	*	-0.7154	-0.8116	0.02	0	0.11	0	0.13	0.15	0.04	0.18	0.02	0.01	0.42	0.2	0	1.04	0	0	0.18	0	1.21	1.03
cis_mRNA_dw20k	1947	NA	LTCONS_00202402	NM_015513.4	chr3	9947359	9962636	8309	+	chr3	9933840	9945413	2696	+	*	0.7791	0.8593	0.02	0	0.11	0	0.13	0.15	0.04	0.18	0.02	0.01	0.63	0.69	1.22	0.54	1.66	0.99	1.1	3.31	0.86	0.86
cis_mRNA_overlap	0	Lnc-AntiOverlap-mRNA	LTCONS_00202402	NM_207351.4	chr3	9947359	9962636	8309	+	chr3	9945542	9952415	3782	-	*	0.8908	0.7454	0.02	0	0.11	0	0.13	0.15	0.04	0.18	0.02	0.01	0.08	0.05	0.1	0.03	0.12	0.16	0	0.16	0.04	0.04
cis_mRNA_dw20k	13739	NA	LTCONS_00202403	XM_017007334.1	chr3	9947359	9962636	8289	+	chr3	9917098	9933621	2550	+	*	0.8299	0.6498	0	0.01	0.01	0	0.12	0.04	0.03	0	0.01	0.02	0	0	0.09	0	0.17	0.1	0	0	0	0
cis_mRNA_overlap	0	Lnc-CompleteIn-mRNAIntron	LTCONS_00203365	NM_001003793.2	chr3	29285309	29295225	9917	+	chr3	29281312	30010395	8217	+	*	0.8517	0.7048	0.77	0.24	1.19	1.99	0.68	0.34	1.47	0.27	0.24	1.96	0.36	0.08	0	0.85	0.08	0	0.9	0	0	0.69
cis_mRNA_overlap	0	Lnc-CompleteIn-mRNAIntron	LTCONS_00203365	NM_001177712.1	chr3	29285309	29295225	9917	+	chr3	29281312	29991318	1777	+	*	0.8963	0.8003	0.77	0.24	1.19	1.99	0.68	0.34	1.47	0.27	0.24	1.96	0	0	0	0.16	0	0	0.14	0	0	0.19
cis_mRNA_overlap	0	Lnc-CompleteIn-mRNAIntron	LTCONS_00203365	NM_014483.3	chr3	29285309	29295225	9917	+	chr3	29281312	29991318	1738	+	*	0.6058	0.622	0.77	0.24	1.19	1.99	0.68	0.34	1.47	0.27	0.24	1.96	0.32	0	1.8	0.57	0.81	0.59	0.68	0.3	0.43	1.8
cis_mRNA_overlap	0	Lnc-CompleteIn-mRNAIntron	LTCONS_00203365	XM_017006181.1	chr3	29285309	29295225	9917	+	chr3	29280860	30010391	8563	+	*	0.7197	0.7028	0.77	0.24	1.19	1.99	0.68	0.34	1.47	0.27	0.24	1.96	0	0	0	0.56	0	0	0	0	0	0.21
cis_mRNA_dw20k	12233	NA	LTCONS_00203739	NM_002078.4	chr3	37379111	37435497	5453	+	chr3	37243191	37366879	7886	+	*	0.6073	0.6096	0	0	0.02	0.12	0.03	0.01	0	0	0	0.28	0	0.3	0.29	0.41	0.11	0.33	0.12	0.28	0.11	0.42
cis_mRNA_dw20k	3088	NA	LTCONS_00204151	NM_001129908.2	chr3	43060802	43064093	3292	+	chr3	42979267	43057715	3433	+	*	0.8468	0.8659	0.09	0.01	0.53	0.36	0.05	0.09	0.15	0.01	0.03	0.78	1.4	0.21	2.4	4.72	0.11	0.73	1.03	0.07	0.82	4.32
cis_mRNA_up10k	1932	NA	LTCONS_00204786	NM_001243925.1	chr3	50611862	50615200	2039	+	chr3	50617131	50649297	2563	+	*	-0.6648	-0.8554	0.17	0.13	0.28	0.14	0	0.32	0.24	0	0.06	0.54	0.69	2.2	0	0.72	1.77	0	1.26	5.38	1.12	0
cis_mRNA_dw20k	15745	NA	LTCONS_00204787	MTCONS_00204779	chr3	50611862	50615200	1772	+	chr3	50569152	50596118	16719	+	*	0.9097	0.7083	0.08	0	0	0.08	0.03	0.05	0	0	0	0.22	0	0	0	0.01	0	0	0	0	0	0.07
cis_mRNA_up10k	8278	NA	LTCONS_00205243	XM_017005641.1	chr3	58296189	58297990	1802	+	chr3	58306267	58322639	5709	+	*	0.617	0.6372	0.15	0.09	0.38	0.01	0.03	0.36	0.49	0.28	0.01	0.74	0.22	0.39	1.15	1.08	0.46	0.66	1.8	1.39	0.39	1.18
cis_mRNA_overlap	0	mRNA-AntiCompleteIn-LncIntron	LTCONS_00205334	NM_007177.3	chr3	58536038	58580175	1857	+	chr3	58564112	58577764	3470	-	*	0.7749	0.7477	0	0.04	0.17	0.26	0	0	0.08	0	0	0	0	0.07	0	0.18	0	0	0.06	0	0	0
cis_mRNA_up10k	842	NA	LTCONS_00205334	XM_017007302.1	chr3	58536038	58580175	1857	+	chr3	58505136	58535197	2311	-	*	0.8919	0.6486	0	0.04	0.17	0.26	0	0	0.08	0	0	0	0.75	0.25	1.19	2.35	0.11	0.73	0.96	0.29	0.26	0.74
cis_mRNA_overlap	0	Lnc-AntiOverlap-mRNA	LTCONS_00205496	MTCONS_00215047	chr3	64536387	64590084	30131	+	chr3	64515654	64687689	7404	-	*	0.7479	0.7858	0	0	0.01	0.04	0.01	0	0	0	0	0	0	0	0.08	0.07	0	0	0	0	0	0
cis_mRNA_up10k	3	NA	LTCONS_00205637	NM_003848.3	chr3	67654616	67768433	1478	+	chr3	67374717	67654614	2354	-	*	0.6484	0.6816	0.08	0.09	0.48	0.39	0	0	0	0	0.11	0.19	79.63	42.01	71.94	74.78	29.95	24.91	55.58	45.87	63.51	68.2
cis_mRNA_up10k	7	NA	LTCONS_00205637	XM_017007418.1	chr3	67654616	67768433	1478	+	chr3	67358431	67654610	1377	-	*	0.6968	0.7	0.08	0.09	0.48	0.39	0	0	0	0	0.11	0.19	0.29	0	0.61	1.75	0	0.24	0	0	0.77	0.09
cis_mRNA_up10k	3	NA	LTCONS_00205638	NM_003848.3	chr3	67654616	67829652	4547	+	chr3	67374717	67654614	2354	-	*	0.9033	0.8754	0.45	0.17	0.31	0.55	0	0	0.35	0.11	0.37	0.24	79.63	42.01	71.94	74.78	29.95	24.91	55.58	45.87	63.51	68.2
cis_mRNA_up10k	7	NA	LTCONS_00205638	XM_017007418.1	chr3	67654616	67829652	4547	+	chr3	67358431	67654610	1377	-	*	0.6835	0.668	0.45	0.17	0.31	0.55	0	0	0.35	0.11	0.37	0.24	0.29	0	0.61	1.75	0	0.24	0	0	0.77	0.09
cis_mRNA_up10k	3	NA	LTCONS_00205639	NM_003848.3	chr3	67654616	67947713	2433	+	chr3	67374717	67654614	2354	-	*	-0.7103	-0.7233	0	0	0	0	0.04	0.19	0	0.05	0	0	79.63	42.01	71.94	74.78	29.95	24.91	55.58	45.87	63.51	68.2
cis_mRNA_up10k	7	NA	LTCONS_00205639	XM_017007415.1	chr3	67654616	67947713	2433	+	chr3	67268828	67654610	1482	-	*	0.6395	0.6133	0	0	0	0	0.04	0.19	0	0.05	0	0	0	0	0	0.32	0	0.54	0	0.43	0.39	0
cis_mRNA_dw20k	4526	NA	LTCONS_00206487	XM_011513245.2	chr3	100700699	100701937	1239	+	chr3	100609601	100696174	3710	+	*	0.9887	0.9416	0.47	0.09	0.26	0.52	0.03	0.05	0.56	0	0.15	0.71	1.81	0	0.68	1.78	0	0.21	1.81	0	0.58	2.46
cis_mRNA_dw20k	5221	NA	LTCONS_00206487	NM_001308362.1	chr3	100700699	100701937	1239	+	chr3	100635538	100695479	2316	+	*	0.8378	0.8667	0.47	0.09	0.26	0.52	0.03	0.05	0.56	0	0.15	0.71	5.21	2.34	2.81	5.96	0.54	0.3	3.95	0.07	2.02	3.58
cis_mRNA_up10k	7348	NA	LTCONS_00206487	XM_005247066.1	chr3	100700699	100701937	1239	+	chr3	100709284	100748964	1815	+	*	-0.8044	-0.7792	0.47	0.09	0.26	0.52	0.03	0.05	0.56	0	0.15	0.71	0	1.18	0.61	0	1.84	0.78	0.81	2.48	1.45	0
cis_mRNA_up10k	7354	NA	LTCONS_00206487	NM_001007565.2	chr3	100700699	100701937	1239	+	chr3	100709290	100748967	1824	+	*	0.6326	0.7531	0.47	0.09	0.26	0.52	0.03	0.05	0.56	0	0.15	0.71	0	0	0	1.03	0	0	0.49	0	0	0.3
cis_mRNA_up10k	9035	NA	LTCONS_00206487	XM_017005528.1	chr3	100700699	100701937	1239	+	chr3	100710971	100748964	1765	+	*	-0.6547	-0.7306	0.47	0.09	0.26	0.52	0.03	0.05	0.56	0	0.15	0.71	0	0.08	0.4	0	1.06	0	0	0.9	0.63	0
cis_mRNA_overlap	0	Lnc-AntiOverlap-mRNA	LTCONS_00207384	NM_001321309.1	chr3	123584697	123642797	14445	+	chr3	123612296	123884302	7628	-	*	0.7245	0.6836	0	0	0	0.01	0	0.11	0	0	0.03	0	0.06	0.05	0	0.07	0	0.22	0	0.17	0.07	0.06
cis_mRNA_overlap	0	Lnc-AntiOverlap-mRNA	LTCONS_00208371	NM_178177.4	chr3	139389753	139604316	7136	+	chr3	139560180	139678050	1926	-	*	0.72	0.7407	0	0	0	0	0	0	0	0.11	0.02	0	0.15	0.13	0	0	0	0	0.07	0.34	0.34	0
cis_mRNA_up10k	89	NA	LTCONS_00208517	MTCONS_00208518	chr3	141876113	141876540	428	+	chr3	141876628	141926540	7453	+	*	0.958	0.9142	1.83	0	1.52	1.39	0.3	0	1.84	0.6	0	0.42	1.8	0.11	1.47	1.24	0.52	0.56	2.05	0.99	0.14	0.32
cis_mRNA_up10k	359	NA	LTCONS_00208697	NM_003412.3	chr3	147396440	147409036	12597	+	chr3	147409394	147416719	5231	+	*	0.9573	0.9662	0.02	0.17	0.07	0.1	1.04	0	0.06	0	0.76	0	0.05	0.28	0.09	0.1	0.84	0	0.04	0.01	0.99	0.01
cis_mRNA_overlap	0	Lnc-CompleteIn-mRNAIntron	LTCONS_00208970	XM_017006439.1	chr3	152254744	152263347	8604	+	chr3	152243656	152465780	4786	+	*	0.7294	0.7538	0.48	0.11	0.27	0.12	0.42	0.17	0.32	0.02	0.02	0.58	0.44	0.13	0.31	0.18	0.09	0.11	0.3	0	0.08	0.32
cis_mRNA_up10k	5524	NA	LTCONS_00208970	XM_005247471.4	chr3	152254744	152263347	8604	+	chr3	152268870	152465780	5480	+	*	0.6736	0.6018	0.48	0.11	0.27	0.12	0.42	0.17	0.32	0.02	0.02	0.58	3.86	1.68	0.82	1.99	3.13	1.61	3.53	0.95	2.37	2.97
cis_mRNA_up10k	5663	NA	LTCONS_00208970	XM_011512848.2	chr3	152254744	152263347	8604	+	chr3	152269009	152465780	5203	+	*	0.6295	0.6799	0.48	0.11	0.27	0.12	0.42	0.17	0.32	0.02	0.02	0.58	1.34	0.47	1.47	1.07	1.73	1.66	1.26	0.82	0.47	1.28
cis_mRNA_dw20k	9403	NA	LTCONS_00209780	XM_011513087.2	chr3	170986648	170986939	292	+	chr3	170996341	171026677	3193	-	*	0.6364	0.7178	1.43	0.15	0.49	0.41	0	0	0.67	0	0.43	1.24	4.27	3.89	7.28	6.71	2.62	2.14	5.13	1.81	6.4	14.11
cis_mRNA_dw20k	9410	NA	LTCONS_00209780	NM_000340.1	chr3	170986648	170986939	292	+	chr3	170996348	171026979	3439	-	*	0.7234	0.7693	1.43	0.15	0.49	0.41	0	0	0.67	0	0.43	1.24	255.71	168.32	244.92	350.42	117.89	107.93	229.11	142.2	255.71	405.03
cis_mRNA_dw20k	9410	NA	LTCONS_00209780	NM_001278658.1	chr3	170986648	170986939	292	+	chr3	170996348	171026979	3176	-	*	0.6579	0.6319	1.43	0.15	0.49	0.41	0	0	0.67	0	0.43	1.24	9.41	10.23	9.93	11.1	1.73	3.03	11.96	8.48	6.55	28.35
cis_mRNA_overlap	0	Lnc-AntiCompleteIn-mRNAExon	LTCONS_00210576	NM_001966.3	chr3	185190753	185191093	341	+	chr3	185190624	185254098	3850	-	-591.8	0.7518	0.872	1.2	0.23	0.38	0.73	0.14	0.14	0.26	0	0	1.11	92.63	90.86	85.88	106.16	33.72	28.4	78.04	52.46	0.4	115.27
cis_mRNA_overlap	0	Lnc-Overlap-mRNA	LTCONS_00210577	XM_017007458.1	chr3	185282938	185293239	1844	+	chr3	185282938	185482811	3448	+	*	0.9538	0.6213	3.78	4.39	3.13	2.93	15.35	4.07	3.56	8	5.2	3.2	0	0	0	0	0.49	0.1	0.08	0.15	0	0
cis_mRNA_overlap	0	Lnc-Overlap-mRNA	LTCONS_00210817	XM_017006257.1	chr3	188947160	189177404	40823	+	chr3	189099431	189325304	6771	+	*	0.7881	0.8001	0.89	0.15	2.73	0.9	0.96	0.63	4.46	3.18	0.05	3.58	0.14	0	0.14	0.11	0	0.04	0.15	0.21	0	0.16
cis_mRNA_overlap	0	Lnc-Overlap-mRNA	LTCONS_00210817	XM_017006259.1	chr3	188947160	189177404	40823	+	chr3	189120427	189325304	7382	+	*	0.9784	0.903	0.89	0.15	2.73	0.9	0.96	0.63	4.46	3.18	0.05	3.58	0.29	0.03	0.62	0.31	0.17	0.24	1.29	0.89	0.04	0.8
cis_mRNA_overlap	0	Lnc-Overlap-mRNA	LTCONS_00210817	XM_017006261.1	chr3	188947160	189177404	40823	+	chr3	189000774	189325304	6327	+	*	0.8179	0.8545	0.89	0.15	2.73	0.9	0.96	0.63	4.46	3.18	0.05	3.58	0.46	0.05	0.29	0.33	0.13	0.11	0.57	0.8	0	0.81
cis_mRNA_overlap	0	Lnc-Overlap-mRNA	LTCONS_00210819	XM_017006261.1	chr3	188948212	189064805	41452	+	chr3	189000774	189325304	6327	+	*	0.8344	0.9119	0.4	0.06	0.49	0.28	0.13	0.13	1.59	1.21	0.01	0.88	0.46	0.05	0.29	0.33	0.13	0.11	0.57	0.8	0	0.81
cis_mRNA_overlap	0	Lnc-Overlap-mRNA	LTCONS_00210821	XM_011512734.2	chr3	188948413	189211815	81891	+	chr3	189187579	189315693	4251	+	*	0.917	0.8909	0.78	0.13	2.31	0.79	1.05	0.66	5.28	3.25	0.1	3.18	0.55	0.15	1.11	0.56	0.17	0.2	1.89	0.71	0	1.47
cis_mRNA_overlap	0	Lnc-Overlap-mRNA	LTCONS_00210821	XM_011512736.2	chr3	188948413	189211815	81891	+	chr3	189187573	189218181	4030	+	*	0.8527	0.8424	0.78	0.13	2.31	0.79	1.05	0.66	5.28	3.25	0.1	3.18	0.3	0	1.65	0.1	0.64	0.43	1.8	2.37	0.12	2.56
cis_mRNA_overlap	0	Lnc-Overlap-mRNA	LTCONS_00210821	XM_017006257.1	chr3	188948413	189211815	81891	+	chr3	189099431	189325304	6771	+	*	0.724	0.8124	0.78	0.13	2.31	0.79	1.05	0.66	5.28	3.25	0.1	3.18	0.14	0	0.14	0.11	0	0.04	0.15	0.21	0	0.16
cis_mRNA_overlap	0	Lnc-Overlap-mRNA	LTCONS_00210821	XM_017006259.1	chr3	188948413	189211815	81891	+	chr3	189120427	189325304	7382	+	*	0.9889	0.9152	0.78	0.13	2.31	0.79	1.05	0.66	5.28	3.25	0.1	3.18	0.29	0.03	0.62	0.31	0.17	0.24	1.29	0.89	0.04	0.8
cis_mRNA_overlap	0	Lnc-Overlap-mRNA	LTCONS_00210821	XM_017006261.1	chr3	188948413	189211815	81891	+	chr3	189000774	189325304	6327	+	*	0.7624	0.8424	0.78	0.13	2.31	0.79	1.05	0.66	5.28	3.25	0.1	3.18	0.46	0.05	0.29	0.33	0.13	0.11	0.57	0.8	0	0.81
cis_mRNA_dw20k	6180	NA	LTCONS_00210841	XM_011512736.2	chr3	189224360	189224953	594	+	chr3	189187573	189218181	4030	+	*	0.9006	0.7866	1.05	0.14	5.27	1.52	1.26	1.05	7.7	5.71	0.05	5.27	0.3	0	1.65	0.1	0.64	0.43	1.8	2.37	0.12	2.56
cis_mRNA_overlap	0	Lnc-CompleteIn-mRNAIntron	LTCONS_00210841	XM_011512734.2	chr3	189224360	189224953	594	+	chr3	189187579	189315693	4251	+	*	0.9137	0.9207	1.05	0.14	5.27	1.52	1.26	1.05	7.7	5.71	0.05	5.27	0.55	0.15	1.11	0.56	0.17	0.2	1.89	0.71	0	1.47
cis_mRNA_overlap	0	Lnc-CompleteIn-mRNAIntron	LTCONS_00210841	XM_017006257.1	chr3	189224360	189224953	594	+	chr3	189099431	189325304	6771	+	*	0.7867	0.8236	1.05	0.14	5.27	1.52	1.26	1.05	7.7	5.71	0.05	5.27	0.14	0	0.14	0.11	0	0.04	0.15	0.21	0	0.16
cis_mRNA_overlap	0	Lnc-CompleteIn-mRNAIntron	LTCONS_00210841	XM_017006259.1	chr3	189224360	189224953	594	+	chr3	189120427	189325304	7382	+	*	0.9774	0.9451	1.05	0.14	5.27	1.52	1.26	1.05	7.7	5.71	0.05	5.27	0.29	0.03	0.62	0.31	0.17	0.24	1.29	0.89	0.04	0.8
cis_mRNA_overlap	0	Lnc-CompleteIn-mRNAIntron	LTCONS_00210841	XM_017006261.1	chr3	189224360	189224953	594	+	chr3	189000774	189325304	6327	+	*	0.7698	0.8171	1.05	0.14	5.27	1.52	1.26	1.05	7.7	5.71	0.05	5.27	0.46	0.05	0.29	0.33	0.13	0.11	0.57	0.8	0	0.81
cis_mRNA_dw20k	17656	NA	LTCONS_00210843	XM_011512734.2	chr3	189333348	189334962	1615	+	chr3	189187579	189315693	4251	+	*	0.8338	0.9025	0.1	0.01	0.18	0.04	0	0.1	0.6	0.42	0	0.26	0.55	0.15	1.11	0.56	0.17	0.2	1.89	0.71	0	1.47
cis_mRNA_dw20k	8045	NA	LTCONS_00210843	XM_017006257.1	chr3	189333348	189334962	1615	+	chr3	189099431	189325304	6771	+	*	0.741	0.9257	0.1	0.01	0.18	0.04	0	0.1	0.6	0.42	0	0.26	0.14	0	0.14	0.11	0	0.04	0.15	0.21	0	0.16
cis_mRNA_dw20k	8045	NA	LTCONS_00210843	XM_017006259.1	chr3	189333348	189334962	1615	+	chr3	189120427	189325304	7382	+	*	0.9704	0.9207	0.1	0.01	0.18	0.04	0	0.1	0.6	0.42	0	0.26	0.29	0.03	0.62	0.31	0.17	0.24	1.29	0.89	0.04	0.8
cis_mRNA_dw20k	8045	NA	LTCONS_00210843	XM_017006261.1	chr3	189333348	189334962	1615	+	chr3	189000774	189325304	6327	+	*	0.7492	0.8049	0.1	0.01	0.18	0.04	0	0.1	0.6	0.42	0	0.26	0.46	0.05	0.29	0.33	0.13	0.11	0.57	0.8	0	0.81
cis_mRNA_up10k	7344	NA	LTCONS_00211151	MTCONS_00211159	chr3	195642053	195650750	7352	+	chr3	195658093	195733553	10673	+	*	0.8202	0.6242	0.03	0.06	0.04	0.08	0.21	0.36	0.09	0.96	0.2	0.12	0.83	0.74	1.93	1.13	2.26	1.71	1.85	3.75	1.36	2.19
cis_mRNA_up10k	7344	NA	LTCONS_00211151	MTCONS_00211162	chr3	195642053	195650750	7352	+	chr3	195658093	195733553	3468	+	*	0.7817	0.7939	0.03	0.06	0.04	0.08	0.21	0.36	0.09	0.96	0.2	0.12	0.27	0.53	0.26	0.24	0.95	0.69	0.89	1.35	0.85	0.63
cis_mRNA_dw20k	831	NA	LTCONS_00212539	NM_001012413.3	chr3	20168102	20168650	549	-	chr3	20169480	20186233	2183	-	*	0.9814	0.8305	0	0.05	0	0	0	1.17	0	0.21	0.05	0.18	0	0.13	0	0.03	0	0.77	0	0.18	0	0.04
cis_mRNA_overlap	0	Lnc-CompleteIn-mRNAIntron	LTCONS_00212539	XM_011533375.2	chr3	20168102	20168650	549	-	chr3	20160928	20185939	2498	-	*	0.935	0.75	0	0.05	0	0	0	1.17	0	0.21	0.05	0.18	0	0	0	0	0	0.08	0	0.04	0	0
cis_mRNA_dw20k	1277	NA	LTCONS_00214188	XM_005265382.4	chr3	50190351	50195046	4696	-	chr3	50155478	50189075	3360	+	*	0.8475	0.8061	0.16	0.51	0.2	0.18	0.94	0.66	0.12	0.32	0.61	0.3	0.23	0.31	0.35	0.48	2.85	1.26	0.12	1.1	0.83	0.33
cis_mRNA_overlap	0	Lnc-CompleteIn-mRNAIntron	LTCONS_00214852	XM_017005849.1	chr3	59016241	59022788	6548	-	chr3	58742006	59050045	3156	-	*	0.9088	0.7182	0.04	0.05	0.03	0.04	0.01	0.41	0.11	0.79	0.02	0.15	0	0.02	0.04	0.05	0	0.06	0	0.48	0	0.11
cis_mRNA_overlap	0	Lnc-CompleteIn-mRNAIntron	LTCONS_00214852	XM_017005851.1	chr3	59016241	59022788	6548	-	chr3	58861228	59050048	4144	-	*	0.9788	0.9756	0.04	0.05	0.03	0.04	0.01	0.41	0.11	0.79	0.02	0.15	0.04	0.07	0.05	0.06	0	0.19	0.12	0.37	0.03	0.12
cis_mRNA_dw20k	12810	NA	LTCONS_00217030	NM_001015050.2	chr3	125825661	125916466	32668	-	chr3	125929275	125937044	810	-	*	0.9793	0.7416	0.07	0.23	0.04	0.03	0.22	0.68	0.04	0.12	0.37	0.11	0.13	1.85	0.11	0.4	1.78	8.42	0.18	0.15	5.15	0.2
cis_mRNA_dw20k	12810	NA	LTCONS_00217030	NM_001195223.1	chr3	125825661	125916466	32668	-	chr3	125929275	125937044	921	-	*	0.8569	0.7328	0.07	0.23	0.04	0.03	0.22	0.68	0.04	0.12	0.37	0.11	0.05	0.92	0	0	0	17.98	0	0	0.18	0
cis_mRNA_overlap	0	mRNA-AntiCompleteIn-LncIntron	LTCONS_00217548	NM_152395.2	chr3	131379880	131395137	2710	-	chr3	131381765	131388830	6117	+	*	0.8213	0.6833	0	0.07	0	0	0	0	0	0	0.04	0	5.17	7.75	5.61	5.26	4.68	5.79	4.88	5.45	8.43	6.6
cis_mRNA_dw20k	8379	NA	LTCONS_00218109	NM_198504.2	chr3	142949357	142952853	1283	-	chr3	142961231	142963336	2106	-	*	0.9468	0.8875	0.09	0.22	0.14	0.13	1.35	0.45	0.09	0	1.05	0.28	4.11	5.48	5.3	4.12	26.55	5.84	4.51	4.21	14.38	4.57
cis_mRNA_dw20k	7758	NA	LTCONS_00218149	XM_005247535.3	chr3	146038188	146061679	23472	-	chr3	146069436	146160991	3621	-	*	0.8543	0.7903	0.17	0.11	0.34	0.08	0.7	0.74	0.29	1.11	0.06	0.25	2.19	0	2.41	0	1.22	6	3.01	10.62	0.36	3.27
cis_mRNA_overlap	0	Lnc-AntiOverlap-mRNA	LTCONS_00219860	MTCONS_00210703	chr3	186984852	186991896	2171	-	chr3	186990713	187078553	4329	+	*	0.6748	0.7052	0.1	0.06	0.39	1.06	0.06	0.03	0.8	0	0.13	3.1	1.35	1.92	3.99	2.8	7.32	0	3.97	0.18	1.96	8.39
cis_mRNA_overlap	0	Lnc-CompleteIn-mRNAIntron	LTCONS_00220395	XM_011512417.1	chr3	196202015	196205820	3806	-	chr3	196197443	196211316	1111	-	*	0.9515	0.7806	0.04	0	0.06	0.02	0.75	0.04	0.08	0.31	0.01	0.08	0.03	0	0.19	0	0.56	0	0.04	0.3	0	0
cis_mRNA_up10k	2650	NA	LTCONS_00220667	XM_017005702.1	chr3	19138294	19145905	7612	.	chr3	19148554	19534788	4794	+	*	0.9858	0.6741	0	0.1	0	0	0	0	0	0	0.01	0	0.05	0.32	0.03	0.02	0	0	0.01	0	0.05	0.03
cis_mRNA_overlap	0	Lnc-AntiCompleteIn-mRNAIntron	LTCONS_00220940	MTCONS_00206877	chr3	112760722	112763006	2285	.	chr3	112664716	112820581	1361	+	*	0.6659	0.8467	0	0.09	0	0	0.02	0.03	0	0	0.13	0	0.05	1.24	0.37	0.15	0.48	0.63	0.19	0.4	0.52	0.12
cis_mRNA_overlap	0	Lnc-Overlap-mRNA	LTCONS_00221392	MTCONS_00221389	chr4	124247	204778	3705	+	chr4	124247	164655	5790	+	*	0.684	0.6228	0	0	0	0	0.06	0	0	0.14	0	0	0.16	0.09	0.22	0.18	0.24	0.04	0.27	0.36	0.12	0
cis_mRNA_dw20k	7168	NA	LTCONS_00221513	XM_017008247.1	chr4	689200	690903	1704	+	chr4	674965	682033	1803	+	*	0.7555	0.8365	0	0	0.02	0.04	0.04	0.85	0.05	0.22	0.07	0.04	0.03	0	0.14	0	0.11	1.08	0.87	0.28	0.25	0.23
cis_mRNA_overlap	0	Lnc-AntiOverlap-mRNA	LTCONS_00221513	XM_005272297.1	chr4	689200	690903	1704	+	chr4	681824	689468	1864	-	*	0.8164	0.7549	0	0	0.02	0.04	0.04	0.85	0.05	0.22	0.07	0.04	0.06	0	0	0	0.07	0.6	0.37	0.07	0.16	0
cis_mRNA_up10k	1601	NA	LTCONS_00221604	XM_017007636.1	chr4	1251546	1288291	1113	+	chr4	1289891	1340137	2342	+	*	0.7894	0.9323	0	0	0.06	0.09	0.05	1.44	0	0	0	0	0	0.05	0.07	0.28	0.08	0.36	0	0	0	0
cis_mRNA_up10k	4466	NA	LTCONS_00221704	NM_012318.2	chr4	1860712	1862539	1828	+	chr4	1811479	1856247	5462	-	*	0.8874	0.6809	0.15	0.05	0.16	0.01	0.14	0.72	0.06	0.45	0.12	0.06	2.79	2.36	2.49	1.72	4.38	6.76	3.29	4.02	2.82	2.53
cis_mRNA_up10k	4758	NA	LTCONS_00221704	XM_006713884.1	chr4	1860712	1862539	1828	+	chr4	1811479	1855955	5167	-	*	0.9464	0.766	0.15	0.05	0.16	0.01	0.14	0.72	0.06	0.45	0.12	0.06	0.56	0.46	1.41	0.73	1.24	4.09	1.23	2.25	0.8	0.19
cis_mRNA_up10k	8858	NA	LTCONS_00221704	NM_001042424.2	chr4	1860712	1862539	1828	+	chr4	1871396	1982207	7572	+	*	0.9421	0.693	0.15	0.05	0.16	0.01	0.14	0.72	0.06	0.45	0.12	0.06	1.27	1.16	1.01	0.36	0.86	6.09	1.22	2.29	1.21	0.51
cis_mRNA_dw20k	8042	NA	LTCONS_00222910	XM_005248131.4	chr4	23560923	23783980	2968	+	chr4	23792021	23889856	7061	-	*	0.8325	0.7006	0	0	0	0	0	0.08	0	0	0.06	0	1.82	1.63	2.18	1.81	0.11	3.9	1.7	0.6	3.88	2.06
cis_mRNA_dw20k	8042	NA	LTCONS_00222910	XM_005248132.1	chr4	23560923	23783980	2968	+	chr4	23792021	23904089	6240	-	*	0.6796	0.7237	0	0	0	0	0	0.08	0	0	0.06	0	0	0	0.32	0	0	0.24	0	0	0.33	0
cis_mRNA_dw20k	8042	NA	LTCONS_00222910	XM_011513766.1	chr4	23560923	23783980	2968	+	chr4	23792021	23904089	6392	-	*	0.7601	0.7006	0	0	0	0	0	0.08	0	0	0.06	0	0.2	0.11	0.21	0.09	0.03	0.39	0.27	0.04	0.29	0.06
cis_mRNA_dw20k	16322	NA	LTCONS_00224475	MTCONS_00224466	chr4	73520322	73542829	22361	+	chr4	73481740	73504001	2245	+	*	0.775	0.6364	1.87	1.42	5.78	1.81	1.93	1.45	4.42	0.03	1.11	11.43	22.12	18.01	20.4	21.86	5.07	5.32	20.27	0	12.92	35.3
cis_mRNA_overlap	0	Lnc-Overlap-mRNA	LTCONS_00224475	MTCONS_00224467	chr4	73520322	73542829	22361	+	chr4	73481740	73542829	17207	+	*	0.806	0.6485	1.87	1.42	5.78	1.81	1.93	1.45	4.42	0.03	1.11	11.43	4.38	3.75	3.23	4.32	0.81	0.4	4.72	0.05	1.41	8.47
cis_mRNA_overlap	0	Lnc-AntiOverlap-mRNA	LTCONS_00224476	MTCONS_00231547	chr4	73530498	73595468	306	+	chr4	73582297	73620631	3596	-	*	-0.6591	-0.6228	4.89	3.42	3.82	4.3	1.48	1.05	1.98	0	1.69	3.61	0	0	0	0	0.02	0	0	0.04	0	0
cis_mRNA_overlap	0	Lnc-Overlap-mRNA	LTCONS_00224476	MTCONS_00224467	chr4	73530498	73595468	306	+	chr4	73481740	73542829	17207	+	*	0.7113	0.7455	4.89	3.42	3.82	4.3	1.48	1.05	1.98	0	1.69	3.61	4.38	3.75	3.23	4.32	0.81	0.4	4.72	0.05	1.41	8.47
cis_mRNA_overlap	0	Lnc-Overlap-mRNA	LTCONS_00224476	MTCONS_00224468	chr4	73530498	73595468	306	+	chr4	73481740	73542829	16293	+	*	0.8049	0.8545	4.89	3.42	3.82	4.3	1.48	1.05	1.98	0	1.69	3.61	2.54	2.3	1.06	1.16	0.31	0.26	0.48	0	0.54	2.82
cis_mRNA_overlap	0	Lnc-Overlap-mRNA	LTCONS_00224512	XM_017008231.1	chr4	74123280	74303099	17037	+	chr4	74123280	74242196	1696	+	*	0.776	0.9726	1.37	0.81	1.13	0.97	0.58	1.43	1.96	0.64	0.72	5.37	0.55	0.23	0.3	0.49	0	0.58	0.74	0	0.28	0.9
cis_mRNA_overlap	0	Lnc-Overlap-mRNA	LTCONS_00224512	XM_017008234.1	chr4	74123280	74303099	17037	+	chr4	74158103	74228730	2584	+	*	0.8924	0.8909	1.37	0.81	1.13	0.97	0.58	1.43	1.96	0.64	0.72	5.37	0.23	0.4	0.44	0.29	0.18	0.9	0.73	0.22	0.19	1.39
cis_mRNA_up10k	4473	NA	LTCONS_00224512	XM_005265666.4	chr4	74123280	74303099	17037	+	chr4	74307571	74314564	2737	+	*	0.7832	0.6966	1.37	0.81	1.13	0.97	0.58	1.43	1.96	0.64	0.72	5.37	0.01	0	0	0	0	0.01	0.06	0	0.02	0.06
cis_mRNA_overlap	0	Lnc-CompleteIn-mRNAIntron	LTCONS_00224515	XM_017008225.1	chr4	74152213	74156973	4761	+	chr4	74123280	74303099	2596	+	*	0.6657	0.6037	0.62	0.15	0.75	0.49	0.07	0.39	0.64	0.01	0.53	4.41	0.21	0.2	0.08	0.04	0	0.08	0.06	0	0.1	0.27
cis_mRNA_overlap	0	Lnc-CompleteIn-mRNAIntron	LTCONS_00224515	XM_017008231.1	chr4	74152213	74156973	4761	+	chr4	74123280	74242196	1696	+	*	0.6855	0.766	0.62	0.15	0.75	0.49	0.07	0.39	0.64	0.01	0.53	4.41	0.55	0.23	0.3	0.49	0	0.58	0.74	0	0.28	0.9
cis_mRNA_up10k	1169	NA	LTCONS_00224515	XM_017008235.1	chr4	74152213	74156973	4761	+	chr4	74158141	74303099	2546	+	*	0.7329	0.6829	0.62	0.15	0.75	0.49	0.07	0.39	0.64	0.01	0.53	4.41	0.14	0.47	0.12	0.1	0.05	0.05	0.29	0.01	0.12	0.62
cis_mRNA_overlap	0	Lnc-CompleteIn-mRNAIntron	LTCONS_00224533	XM_017008224.1	chr4	74299625	74300500	876	+	chr4	74171775	74303099	4040	+	*	0.8257	0.8218	0.2	0.17	0.25	0.42	0.23	0.19	0.87	0.16	0.55	1.46	0	0.03	0.02	0.07	0	0	0.08	0	0.07	0.09
cis_mRNA_up10k	7072	NA	LTCONS_00224533	XM_005265666.4	chr4	74299625	74300500	876	+	chr4	74307571	74314564	2737	+	*	0.9065	0.6575	0.2	0.17	0.25	0.42	0.23	0.19	0.87	0.16	0.55	1.46	0.01	0	0	0	0	0.01	0.06	0	0.02	0.06
cis_mRNA_up10k	7078	NA	LTCONS_00224656	XM_005263165.4	chr4	76580740	76680160	17305	+	chr4	76687237	76780550	8755	+	*	0.9491	0.8909	0.43	0.22	0.85	0.57	0.63	0.17	0.99	0.09	0.18	1.3	0.23	0.08	0.78	0.53	0.56	0.17	1.01	0.14	0.25	0.93
cis_mRNA_overlap	0	Lnc-CompleteIn-mRNAIntron	LTCONS_00224667	XM_005263165.4	chr4	76764037	76766614	2578	+	chr4	76687237	76780550	8755	+	*	0.9351	0.9515	0.17	0.15	0.46	0.19	0.41	0.08	0.93	0.07	0.16	0.71	0.23	0.08	0.78	0.53	0.56	0.17	1.01	0.14	0.25	0.93
cis_mRNA_overlap	0	Lnc-CompleteIn-mRNAIntron	LTCONS_00224667	XM_011532160.1	chr4	76764037	76766614	2578	+	chr4	76716001	76780550	7319	+	*	0.6791	0.7523	0.17	0.15	0.46	0.19	0.41	0.08	0.93	0.07	0.16	0.71	0.06	0	0.17	0.21	0.08	0	0.26	0.08	0.06	0.11
cis_mRNA_overlap	0	Lnc-CompleteIn-mRNAIntron	LTCONS_00224667	XM_011532161.2	chr4	76764037	76766614	2578	+	chr4	76709603	76780550	7497	+	*	0.7444	0.7755	0.17	0.15	0.46	0.19	0.41	0.08	0.93	0.07	0.16	0.71	0.1	0.18	0.18	0.06	0.08	0	0.19	0	0	0.24
cis_mRNA_overlap	0	Lnc-CompleteIn-mRNAIntron	LTCONS_00224668	NM_020859.3	chr4	76766715	76768596	1882	+	chr4	76435100	76783253	11020	+	*	0.6503	0.6689	0.29	0.11	0.94	0.22	0.31	0.11	0.94	0.08	0.22	1.03	0.41	0	1.06	0.15	0	0.07	0.2	0	0	0.33
cis_mRNA_overlap	0	Lnc-CompleteIn-mRNAIntron	LTCONS_00224668	XM_005263165.4	chr4	76766715	76768596	1882	+	chr4	76687237	76780550	8755	+	*	0.9249	0.9175	0.29	0.11	0.94	0.22	0.31	0.11	0.94	0.08	0.22	1.03	0.23	0.08	0.78	0.53	0.56	0.17	1.01	0.14	0.25	0.93
cis_mRNA_overlap	0	Lnc-CompleteIn-mRNAIntron	LTCONS_00224668	XM_011532160.1	chr4	76766715	76768596	1882	+	chr4	76716001	76780550	7319	+	*	0.6309	0.608	0.29	0.11	0.94	0.22	0.31	0.11	0.94	0.08	0.22	1.03	0.06	0	0.17	0.21	0.08	0	0.26	0.08	0.06	0.11
cis_mRNA_overlap	0	Lnc-CompleteIn-mRNAIntron	LTCONS_00224668	XM_011532161.2	chr4	76766715	76768596	1882	+	chr4	76709603	76780550	7497	+	*	0.7866	0.764	0.29	0.11	0.94	0.22	0.31	0.11	0.94	0.08	0.22	1.03	0.1	0.18	0.18	0.06	0.08	0	0.19	0	0	0.24
cis_mRNA_overlap	0	Lnc-AntiOverlap-mRNA	LTCONS_00225120	NM_001265578.1	chr4	88709696	88730103	3305	+	chr4	88725954	88823361	4988	-	-2826.25	0.8305	0.8181	0	0	0.07	0.03	0	0	0.22	0.2	0	0.18	0	0	0.01	1.07	0.69	0	1.93	1.12	0.09	1.6
cis_mRNA_dw20k	267	NA	LTCONS_00225443	XM_017007715.1	chr4	99123773	99124253	481	+	chr4	99124519	99144330	1510	-	*	0.8009	0.8424	8.61	2.45	8.65	14.85	0.42	0.41	4.75	0.26	0.76	4.77	26.14	7.45	33.87	22.29	0	0.1	15.37	6.37	1.44	23.78
cis_mRNA_overlap	0	Lnc-AntiCompleteIn-mRNAExon	LTCONS_00225443	NM_000670.4	chr4	99123773	99124253	481	+	chr4	99123657	99144298	2004	-	-890.4	0.816	0.8788	8.61	2.45	8.65	14.85	0.42	0.41	4.75	0.26	0.76	4.77	816.34	280.96	959	1191.26	3.14	7.29	486.39	47.34	69.25	1366.13
cis_mRNA_overlap	0	Lnc-AntiCompleteIn-mRNAExon	LTCONS_00225443	NM_001306171.1	chr4	99123773	99124253	481	+	chr4	99123657	99144298	2152	-	-890.4	0.7823	0.9142	8.61	2.45	8.65	14.85	0.42	0.41	4.75	0.26	0.76	4.77	9.05	4.97	10.98	11.05	0	0	5.85	0	0.99	14.2
cis_mRNA_overlap	0	Lnc-AntiCompleteIn-mRNAExon	LTCONS_00225443	NM_001306172.1	chr4	99123773	99124253	481	+	chr4	99123657	99144298	2144	-	-890.4	0.7061	0.8875	8.61	2.45	8.65	14.85	0.42	0.41	4.75	0.26	0.76	4.77	30.03	10.39	36.32	44.64	0.17	0.17	17.32	0.69	2.4	66.77
cis_mRNA_dw20k	14532	NA	LTCONS_00226190	XM_006714240.1	chr4	119310049	119319042	8994	+	chr4	119212713	119295518	5670	+	*	0.7316	0.6155	0.02	0.05	0.13	0.09	0.11	0.11	0.11	0.82	0.13	0.15	0.48	0.52	0.92	0.66	0.37	0.31	0.26	1.26	0.87	0.7
cis_mRNA_dw20k	14532	NA	LTCONS_00226190	XM_017008316.1	chr4	119310049	119319042	8994	+	chr4	119212583	119295518	6333	+	*	0.6134	0.7125	0.02	0.05	0.13	0.09	0.11	0.11	0.11	0.82	0.13	0.15	0.01	0	0.32	0.02	0	0	0.3	0.42	0.32	0.24
cis_mRNA_dw20k	836	NA	LTCONS_00226847	NM_012118.3	chr4	139046774	139049343	2570	+	chr4	139015759	139045939	1984	+	*	0.9658	0.8303	2	0.69	3.43	1.37	0.7	0.76	1.13	0.35	1.04	0.68	9.86	5.39	15.97	7.6	4.13	3.78	3.29	1.95	6.14	3.1
cis_mRNA_dw20k	4925	NA	LTCONS_00227221	NM_001243349.1	chr4	151109232	151115357	6126	+	chr4	151120281	151228030	5113	-	*	0.6803	0.6848	0.16	0.1	0.18	0.09	0.07	0.2	0.81	0.04	0.02	0.17	0.96	1.2	2.23	1.66	2.43	2.96	3.4	1.21	0	1.79
cis_mRNA_dw20k	12542	NA	LTCONS_00227417	NM_005141.4	chr4	154585304	154596837	5371	+	chr4	154562980	154572763	3628	+	*	-0.7735	-0.6865	0	0	0.01	0.01	0.22	0.22	0	1.13	0.01	0.01	3431.11	3683.41	2655.68	3574.72	1025.63	1936.58	4598.48	145.95	3768.58	5247.4
cis_mRNA_dw20k	7298	NA	LTCONS_00227417	NM_000509.5	chr4	154585304	154596837	5371	+	chr4	154604134	154612808	1719	-	*	-0.6458	-0.6039	0	0	0.01	0.01	0.22	0.22	0	1.13	0.01	0.01	1521.74	1944.14	925.11	1409.24	421.84	1160.58	1371.75	62.88	2111.05	3080.94
cis_mRNA_dw20k	7740	NA	LTCONS_00227417	NM_021870.2	chr4	154585304	154596837	5371	+	chr4	154604576	154612750	1761	-	*	-0.6899	-0.731	0	0	0.01	0.01	0.22	0.22	0	1.13	0.01	0.01	477.72	463.98	306.86	441.03	177.69	174.55	734.18	40.81	634.91	742.53
cis_mRNA_overlap	0	Lnc-AntiOverlap-mRNA	LTCONS_00227417	MTCONS_00234544	chr4	154585304	154596837	5371	+	chr4	154595790	154612644	1576	-	*	-0.7932	-0.6865	0	0	0.01	0.01	0.22	0.22	0	1.13	0.01	0.01	3205.8	3223.64	2650.2	3456.13	1312.47	2348.34	5071.18	253.69	4221.55	3976.89
cis_mRNA_overlap	0	Lnc-AntiOverlap-mRNA	LTCONS_00227417	NM_000508.4	chr4	154585304	154596837	5371	+	chr4	154583126	154590766	3678	-	-3153.52	-0.6901	-0.8263	0	0	0.01	0.01	0.22	0.22	0	1.13	0.01	0.01	561.4	895.89	302.87	469.02	246.75	306.47	529.03	13.88	451.84	846.79
cis_mRNA_overlap	0	Lnc-AntiOverlap-mRNA	LTCONS_00227417	NM_021871.3	chr4	154585304	154596837	5371	+	chr4	154585260	154590766	2248	-	-3542.06	-0.8043	-0.731	0	0	0.01	0.01	0.22	0.22	0	1.13	0.01	0.01	6352.41	6897.83	5184.32	6461.9	2612.77	4641.49	9207.29	285.88	8814.35	9044.27
cis_mRNA_dw20k	4005	NA	LTCONS_00227645	NM_001281738.1	chr4	158712717	158714590	1874	+	chr4	158682108	158708713	1952	+	*	0.7655	0.9058	0.36	0.25	0.39	0.57	0.07	0.39	0.44	0.08	0.11	0.67	5.29	3.58	5.18	11.38	0.8	5.59	10.81	4.47	2.27	6.77
cis_mRNA_dw20k	4005	NA	LTCONS_00227645	NM_004453.3	chr4	158712717	158714590	1874	+	chr4	158672101	158708713	2396	+	*	0.8584	0.8207	0.36	0.25	0.39	0.57	0.07	0.39	0.44	0.08	0.11	0.67	58.72	27.41	40.33	75.35	11.41	24.19	47.15	12.14	19.04	56.25
cis_mRNA_dw20k	5080	NA	LTCONS_00228561	XM_017008176.1	chr4	185405322	185405644	323	+	chr4	185396841	185400243	1029	+	*	0.779	0.8247	0.24	0	0.41	0.69	0.15	0	0.14	0.16	0	0.75	0.9	0.66	0.86	0.95	0.8	0	0.93	0.9	0.09	2.7
cis_mRNA_overlap	0	Lnc-CompleteIn-mRNAIntron	LTCONS_00230197	XM_011513765.2	chr4	24158077	24169537	11461	-	chr4	23792021	24472975	6810	-	*	0.7349	0.6011	0.33	0.02	0.91	0.2	0.05	0.2	4.2	0.03	0.37	0.22	0	0	0.02	0.01	0	0	0.02	0	0	0
cis_mRNA_overlap	0	Lnc-CompleteIn-mRNAIntron	LTCONS_00230198	XM_011513765.2	chr4	24169969	24171261	1293	-	chr4	23792021	24472975	6810	-	*	0.7592	0.6293	0.59	0	1.5	0.38	0.02	0.29	5.69	0.05	0.6	0.42	0	0	0.02	0.01	0	0	0.02	0	0	0
cis_mRNA_overlap	0	Lnc-CompleteIn-mRNAIntron	LTCONS_00230199	XM_011513765.2	chr4	24171923	24173885	1963	-	chr4	23792021	24472975	6810	-	*	0.7514	0.6312	0.55	0.07	1.4	0.54	0.05	0.34	5.79	0.06	0.57	0.57	0	0	0.02	0.01	0	0	0.02	0	0	0
cis_mRNA_overlap	0	Lnc-CompleteIn-mRNAIntron	LTCONS_00230203	XM_011513765.2	chr4	24204455	24205028	574	-	chr4	23792021	24472975	6810	-	*	0.8155	0.603	0.1	0	1.38	0.1	0	0.19	3.07	0.07	0.74	0.17	0	0	0.02	0.01	0	0	0.02	0	0	0
cis_mRNA_overlap	0	Lnc-Overlap-mRNA	LTCONS_00230204	XM_011513765.2	chr4	24205141	24280147	53691	-	chr4	23792021	24472975	6810	-	*	0.7852	0.6312	1.01	0.04	1.95	0.53	0.04	0.28	5.74	0.07	0.71	0.69	0	0	0.02	0.01	0	0	0.02	0	0	0
cis_mRNA_overlap	0	Lnc-Overlap-mRNA	LTCONS_00230680	MTCONS_00230643	chr4	41168496	41221615	38473	-	chr4	40810027	41214618	9352	-	*	0.8413	0.8693	0.08	0.08	0.28	0.1	0.61	1.23	0.36	1.14	0.05	0.62	0.35	0.17	1.93	0.57	2.59	2.25	1	2.6	0.34	1.55
cis_mRNA_overlap	0	Lnc-Overlap-mRNA	LTCONS_00230680	NM_001166050.1	chr4	41168496	41221615	38473	-	chr4	40810027	41214618	8972	-	*	-0.7975	-0.8123	0.08	0.08	0.28	0.1	0.61	1.23	0.36	1.14	0.05	0.62	0.19	0.6	0.26	0.5	0	0	0.2	0	0.36	0.11
cis_mRNA_overlap	0	Lnc-Overlap-mRNA	LTCONS_00230680	XM_011513688.2	chr4	41168496	41221615	38473	-	chr4	40879957	41214615	3615	-	*	0.8101	0.8754	0.08	0.08	0.28	0.1	0.61	1.23	0.36	1.14	0.05	0.62	0.37	0.02	1.12	0.25	1.18	1.27	0.82	1.15	0.17	0.83
cis_mRNA_overlap	0	Lnc-Overlap-mRNA	LTCONS_00230680	XM_017008145.1	chr4	41168496	41221615	38473	-	chr4	40810030	41214615	8871	-	*	0.721	0.7104	0.08	0.08	0.28	0.1	0.61	1.23	0.36	1.14	0.05	0.62	1.2	0.67	1.16	1.09	1.2	1.56	1.23	1.92	0.38	0.71
cis_mRNA_overlap	0	Lnc-Overlap-mRNA	LTCONS_00230680	XM_017008159.1	chr4	41168496	41221615	38473	-	chr4	40890360	41214615	2094	-	*	0.9613	0.8997	0.08	0.08	0.28	0.1	0.61	1.23	0.36	1.14	0.05	0.62	1.43	0.9	1.6	1.08	3.58	4.44	1.34	5.07	0.62	2.71
cis_mRNA_dw20k	8740	NA	LTCONS_00231331	XM_006714064.2	chr4	67446334	67460023	13690	-	chr4	67468762	67545601	6897	-	*	0.8243	0.7212	0.45	0.21	0.82	0.14	0.28	0.46	0.63	0.27	0.11	0.95	1.66	1.01	1.97	1.23	0.47	1.35	1.18	1.03	0.54	2.1
cis_mRNA_overlap	0	Lnc-AntiOverlap-mRNA	LTCONS_00231417	NM_001074.2	chr4	69111006	69112528	1523	-	chr4	69096475	69112987	1887	+	*	-0.6919	-0.7212	0.03	0.18	0.15	0.04	0.5	0.59	0.06	1.59	0.56	0.09	331.43	165.83	363.52	520.52	92.9	76.34	126.71	4	184.98	360.11
cis_mRNA_overlap	0	Lnc-AntiOverlap-mRNA	LTCONS_00231417	XM_011532229.2	chr4	69111006	69112528	1523	-	chr4	69096474	69111121	1902	+	*	-0.7226	-0.6687	0.03	0.18	0.15	0.04	0.5	0.59	0.06	1.59	0.56	0.09	1.92	1.25	2.17	2.17	0.07	0.95	0.83	0	0.77	2.54
cis_mRNA_overlap	0	Lnc-AntiOverlap-mRNA	LTCONS_00231417	XM_011532230.1	chr4	69111006	69112528	1523	-	chr4	69096474	69112987	1668	+	*	-0.6092	-0.8303	0.03	0.18	0.15	0.04	0.5	0.59	0.06	1.59	0.56	0.09	11.29	2.14	14.02	11.09	1.49	1.77	3.65	0.79	0.85	10.56
tran	NA	NA	LTCONS_00231417	MTCONS_00145474	chr4	69111006	69112528	1523	-	chr19	44905749	44931386	7014	+	-1229.21	0.614	0.6242	0.03	0.18	0.15	0.04	0.5	0.59	0.06	1.59	0.56	0.09	0.19	0.28	0.24	0.2	0.16	0.27	0.18	0.47	0.61	0.25
cis_mRNA_dw20k	2244	NA	LTCONS_00231425	NM_021139.2	chr4	69476646	69477922	1277	-	chr4	69480165	69495908	2103	-	*	0.9012	0.8303	6.47	35.82	4.66	9.2	3.69	1.44	3.45	3.96	9.4	5.06	243.81	850.79	270.99	355.53	235.16	117.01	221.28	364.2	596.66	268.33
cis_mRNA_up10k	75	NA	LTCONS_00231487	NM_014243.2	chr4	72568873	72569332	460	-	chr4	72280969	72568799	5822	-	*	0.8205	0.904	0.07	0	0.16	0.53	0	0	0.25	0	0.07	0	0.13	0.03	0.09	0.16	0.06	0.02	0.13	0.01	0.08	0.03
cis_mRNA_overlap	0	Lnc-Overlap-mRNA	LTCONS_00233619	MTCONS_00233606	chr4	129036595	129093607	2389	-	chr4	128875206	129093607	4047	-	-940.66	0.8166	0.7016	0.1	0.21	0	0	0	0.34	0	0.09	0	0	0.02	0	0	0	0	0.11	0	0	0	0
cis_mRNA_dw20k	7102	NA	LTCONS_00234347	XM_017008905.1	chr4	149343246	149344667	1422	-	chr4	149351768	149733364	1373	-	*	0.9904	0.7552	0.02	0.02	0.02	0	0	0.99	0.02	0	0.03	0	0	0.02	0	0	0	0.17	0	0	0.02	0
cis_mRNA_dw20k	1936	NA	LTCONS_00235434	XM_011532301.1	chr4	184618616	184625761	1725	-	chr4	184627696	184649447	2607	-	*	0.6259	0.6896	0.08	3.43	0.07	0	0.37	2.04	0.1	15.14	7.77	0.02	0	1.1	0	0	0.67	0.48	0	1.27	0	0
cis_mRNA_dw20k	1912	NA	LTCONS_00235435	XM_011532301.1	chr4	184618616	184625785	950	-	chr4	184627696	184649447	2607	-	*	0.7478	0.8158	0	3.76	0	0	0.15	0.61	0	11.75	3.25	0	0	1.1	0	0	0.67	0.48	0	1.27	0	0
cis_mRNA_overlap	0	Lnc-CompleteIn-mRNAIntron	LTCONS_00235611	XM_005263308.1	chr4	185731775	185743976	12182	-	chr4	185585523	185812256	5115	-	*	-0.64	-0.7979	0.48	0.2	1.9	1.19	0.75	0.66	1	0.81	0.32	1.48	0.01	0.09	0	0	0	0	0	0	0.1	0
cis_mRNA_overlap	0	Lnc-CompleteIn-mRNAIntron	LTCONS_00235611	XM_005263312.1	chr4	185731775	185743976	12182	-	chr4	185585523	185812256	4953	-	*	-0.6169	-0.6963	0.48	0.2	1.9	1.19	0.75	0.66	1	0.81	0.32	1.48	0	0.01	0	0	0	0	0	0	0.01	0
cis_mRNA_overlap	0	Lnc-CompleteIn-mRNAIntron	LTCONS_00235611	XM_017008745.1	chr4	185731775	185743976	12182	-	chr4	185620175	185812503	7881	-	*	0.8584	0.7979	0.48	0.2	1.9	1.19	0.75	0.66	1	0.81	0.32	1.48	0	0	0.27	0.12	0	0	0	0	0	0.31
cis_mRNA_overlap	0	Lnc-CompleteIn-mRNAIntron	LTCONS_00235611	XM_017008760.1	chr4	185731775	185743976	12182	-	chr4	185585523	185812256	5022	-	*	-0.6085	-0.7006	0.48	0.2	1.9	1.19	0.75	0.66	1	0.81	0.32	1.48	0	0.05	0	0	0	0	0	0	0.03	0
cis_mRNA_overlap	0	Lnc-CompleteIn-mRNAIntron	LTCONS_00235611	XM_017008761.1	chr4	185731775	185743976	12182	-	chr4	185639962	185812256	8983	-	*	0.6403	0.6364	0.48	0.2	1.9	1.19	0.75	0.66	1	0.81	0.32	1.48	1.34	0.83	3.91	1.46	3.33	2.71	2.42	3.45	1.92	3.01
cis_mRNA_overlap	0	Lnc-Overlap-mRNA	LTCONS_00235613	XM_017008740.1	chr4	185744125	185776124	30022	-	chr4	185620175	185812256	7727	-	*	0.6568	0.6525	0.24	0.1	2.68	0.2	0.59	0.53	1.19	1.05	0.15	0.73	0.17	0.04	0.24	0	0	0.07	0.23	0.28	0.09	0.09
cis_mRNA_overlap	0	Lnc-Overlap-mRNA	LTCONS_00235613	XM_017008761.1	chr4	185744125	185776124	30022	-	chr4	185639962	185812256	8983	-	*	0.7525	0.8182	0.24	0.1	2.68	0.2	0.59	0.53	1.19	1.05	0.15	0.73	1.34	0.83	3.91	1.46	3.33	2.71	2.42	3.45	1.92	3.01
cis_mRNA_overlap	0	Lnc-Overlap-mRNA	LTCONS_00235613	XM_017008764.1	chr4	185744125	185776124	30022	-	chr4	185585523	185812256	4830	-	*	0.714	0.6828	0.24	0.1	2.68	0.2	0.59	0.53	1.19	1.05	0.15	0.73	0	0	0.34	0	0	0.3	0.07	0.22	0	0
cis_mRNA_overlap	0	Lnc-Overlap-mRNA	LTCONS_00235614	XM_017008745.1	chr4	185744125	185809441	64982	-	chr4	185620175	185812503	7881	-	*	0.8273	0.6338	1.9	0.95	3.45	1.48	2.69	0.85	2.13	1.41	0.7	5.34	0	0	0.27	0.12	0	0	0	0	0	0.31
cis_mRNA_overlap	0	Lnc-Overlap-mRNA	LTCONS_00235614	XM_017008749.1	chr4	185744125	185809441	64982	-	chr4	185620176	185812256	7292	-	*	0.8966	0.7003	1.9	0.95	3.45	1.48	2.69	0.85	2.13	1.41	0.7	5.34	0.33	0.1	0.31	0	0.36	0	0	0.02	0	0.72
cis_mRNA_overlap	0	Lnc-AntiOverlap-mRNA	LTCONS_00235623	XM_005262821.3	chr4	186286442	186501058	1250	-	chr4	186265945	186290727	4346	+	-1828.2	0.7401	0.7128	0.17	0	0.14	0.06	0	0	0.1	0	0.02	0.03	4.8	0	4.26	1.66	0.29	1.73	6.25	0.1	0.12	5.11
cis_mRNA_overlap	0	Lnc-AntiOverlap-mRNA	LTCONS_00235623	XM_006714137.2	chr4	186286442	186501058	1250	-	chr4	186265945	186290727	4298	+	-1828.2	0.6443	0.7566	0.17	0	0.14	0.06	0	0	0.1	0	0.02	0.03	3.2	1.84	1.94	2.02	0.16	0.5	1.49	0.18	1.1	2.99
cis_mRNA_up10k	8256	NA	LTCONS_00236112	NM_004967.3	chr4	87789989	87791295	1307	.	chr4	87799550	87812449	1591	+	*	0.9323	0.9817	0	0.08	0	0	0	0.12	0	0	0.14	0	0	0.54	0	0	0	0.33	0	0	0.6	0
cis_mRNA_dw20k	6131	NA	LTCONS_00236408	XM_017008181.1	chr4	186264607	186265321	715	.	chr4	186215714	186258477	3050	+	*	0.8826	0.7256	0.02	0.04	0.14	0.07	0.05	0.12	0.42	0.05	0.02	0.57	0.98	0.63	2.42	1.04	0.91	0.84	2.08	0.51	0.52	3.55
cis_mRNA_up10k	625	NA	LTCONS_00236408	XM_005262821.3	chr4	186264607	186265321	715	.	chr4	186265945	186290727	4346	+	*	0.7076	0.6342	0.02	0.04	0.14	0.07	0.05	0.12	0.42	0.05	0.02	0.57	4.8	0	4.26	1.66	0.29	1.73	6.25	0.1	0.12	5.11
cis_mRNA_dw20k	1256	NA	LTCONS_00236596	NM_007030.2	chr5	655652	658607	2956	+	chr5	659862	693395	6022	-	*	0.8023	0.7599	0.03	0.02	0.11	0.06	1.3	0.71	0.12	0.44	0.06	0.07	0.18	0.31	0.45	0.44	2.12	3.03	0.46	0.48	0.67	0.3
cis_mRNA_dw20k	1256	NA	LTCONS_00236596	XM_017008993.1	chr5	655652	658607	2956	+	chr5	659862	681625	8218	-	*	0.8867	0.8933	0.03	0.02	0.11	0.06	1.3	0.71	0.12	0.44	0.06	0.07	0.02	0.01	0.06	0.02	0.64	0.25	0.31	0.12	0	0.08
cis_mRNA_dw20k	2099	NA	LTCONS_00236596	MTCONS_00236587	chr5	655652	658607	2956	+	chr5	612290	653554	5482	+	*	0.8958	0.8506	0.03	0.02	0.11	0.06	1.3	0.71	0.12	0.44	0.06	0.07	0.27	0.25	0.33	0.14	2.96	3.21	0.35	0.52	0.35	0.38
cis_mRNA_dw20k	2099	NA	LTCONS_00236596	XM_017009626.1	chr5	655652	658607	2956	+	chr5	612347	653554	2251	+	*	0.9502	0.8785	0.03	0.02	0.11	0.06	1.3	0.71	0.12	0.44	0.06	0.07	0	0	0	0	0.93	0.28	0.17	0.29	0	0.17
cis_mRNA_overlap	0	Lnc-CompleteIn-mRNAIntron	LTCONS_00236596	XM_011514063.1	chr5	655652	658607	2956	+	chr5	612344	663493	2078	+	*	0.7037	0.7538	0.03	0.02	0.11	0.06	1.3	0.71	0.12	0.44	0.06	0.07	0.27	0	0.37	0.33	1.06	2.26	0.22	0.8	0.32	0.16
cis_mRNA_up10k	7406	NA	LTCONS_00236596	XM_017010126.1	chr5	655652	658607	2956	+	chr5	666012	668743	1968	+	*	0.9738	0.7713	0.03	0.02	0.11	0.06	1.3	0.71	0.12	0.44	0.06	0.07	0.27	0.15	0.16	0	2	1.56	0.22	0.85	0.16	0.29
cis_mRNA_dw20k	180	NA	LTCONS_00238284	XM_017008956.1	chr5	43483913	43526116	10627	+	chr5	43526295	43556854	2671	-	*	0.8743	0.7229	0	0	0	0	0.05	0	0	0.02	0	0	0	0.07	0.09	0.37	0.68	0	0	0.38	0	0.1
cis_mRNA_overlap	0	Lnc-AntiOverlap-mRNA	LTCONS_00238284	XM_011514074.2	chr5	43483913	43526116	10627	+	chr5	43444677	43484660	3580	-	*	0.6812	0.6918	0	0	0	0	0.05	0	0	0.02	0	0	0.05	0.36	0.16	0.33	0.54	0	0	0.71	0.19	0
cis_mRNA_up10k	24	NA	LTCONS_00238284	NM_022483.4	chr5	43483913	43526116	10627	+	chr5	43444252	43483890	2761	-	*	0.744	0.6833	0	0	0	0	0.05	0	0	0.02	0	0	0.76	1.18	0.46	0.6	1.89	1.14	0.93	2.31	0.99	0.79
cis_mRNA_overlap	0	Lnc-CompleteIn-mRNAIntron	LTCONS_00238388	MTCONS_00238367	chr5	50693757	50741728	47972	+	chr5	50665899	50846522	7130	+	*	0.7241	0.6617	1.02	0.26	0.94	0.67	1.11	0.25	1.35	0.14	0.16	0.93	0.19	0.05	0.19	0	0	0	0.29	0	0	0.1
cis_mRNA_overlap	0	Lnc-CompleteIn-mRNAIntron	LTCONS_00238388	MTCONS_00238372	chr5	50693757	50741728	47972	+	chr5	50666403	50846522	7985	+	*	0.6701	0.6403	1.02	0.26	0.94	0.67	1.11	0.25	1.35	0.14	0.16	0.93	0.08	0.03	0	0.04	0.18	0.02	0.2	0	0.06	0.03
cis_mRNA_overlap	0	Lnc-CompleteIn-mRNAIntron	LTCONS_00238388	XM_011543633.2	chr5	50693757	50741728	47972	+	chr5	50666891	50834924	2578	+	*	0.7367	0.8303	1.02	0.26	0.94	0.67	1.11	0.25	1.35	0.14	0.16	0.93	4.44	2.8	2.38	2.41	3.76	0.44	3.14	0.29	1.6	2.08
cis_mRNA_overlap	0	Lnc-CompleteIn-mRNAIntron	LTCONS_00238388	XM_011543634.2	chr5	50693757	50741728	47972	+	chr5	50666967	50846522	7686	+	*	0.8193	0.8528	1.02	0.26	0.94	0.67	1.11	0.25	1.35	0.14	0.16	0.93	0.22	0.12	0.31	0.2	0.2	0	0.52	0.06	0.15	0.2
cis_mRNA_overlap	0	Lnc-CompleteIn-mRNAIntron	LTCONS_00238388	XM_017009850.1	chr5	50693757	50741728	47972	+	chr5	50666893	50846520	7635	+	*	0.6379	0.6022	1.02	0.26	0.94	0.67	1.11	0.25	1.35	0.14	0.16	0.93	0.08	0	0.28	0.21	0.2	0	0.2	0	0.07	0
cis_mRNA_overlap	0	Lnc-Overlap-mRNA	LTCONS_00238951	XM_017009447.1	chr5	66689852	66986523	936	+	chr5	66596367	67169595	10897	+	*	0.7019	0.6143	0.37	0.74	0.39	0.5	0.14	0.06	0	0	1.59	0	0.01	0	0	0.02	0	0	0	0	0.02	0
cis_mRNA_dw20k	5811	NA	LTCONS_00239856	XM_011543661.2	chr5	82264312	82266817	2506	+	chr5	82110863	82258502	5479	+	*	0.9061	0.7295	0.08	0.13	0.11	0.16	0.34	0.95	0.15	0.17	0.14	0.21	0.05	0.03	0.11	0.07	0.1	0.51	0.07	0.16	0.06	0.25
cis_mRNA_dw20k	9754	NA	LTCONS_00239856	XM_005248610.4	chr5	82264312	82266817	2506	+	chr5	81979866	82254559	2723	+	*	0.977	0.6893	0.08	0.13	0.11	0.16	0.34	0.95	0.15	0.17	0.14	0.21	0.09	0.11	0.09	0.07	0.29	0.73	0.11	0.21	0.17	0.11
cis_mRNA_dw20k	516	NA	LTCONS_00242336	NM_032412.3	chr5	140244304	140245097	794	+	chr5	140175068	140243789	910	+	*	0.9693	0.8571	1.02	0.62	1.32	1.02	2.49	2.85	1.15	5.44	1.41	0.78	16.32	17.36	19.12	13.76	39.93	49.5	15.77	71.57	29.86	10.73
cis_mRNA_overlap	0	Lnc-AntiOverlap-mRNA	LTCONS_00242336	NM_002622.4	chr5	140244304	140245097	794	+	chr5	140245050	140303104	1324	-	*	0.6765	0.6189	1.02	0.62	1.32	1.02	2.49	2.85	1.15	5.44	1.41	0.78	8.15	7.33	5.67	6.45	7.77	18.38	6.86	13.38	8.76	6.45
tran	NA	NA	LTCONS_00242336	MTCONS_00094302	chr5	140244304	140245097	794	+	chr14	74057662	74084493	4759	-	-485.79	0.6356	0.845	1.02	0.62	1.32	1.02	2.49	2.85	1.15	5.44	1.41	0.78	0.19	0.12	0.95	0.64	0.82	1.64	0.4	1	0.34	0.23
tran	NA	NA	LTCONS_00242336	MTCONS_00094303	chr5	140244304	140245097	794	+	chr14	74057662	74084493	4679	-	-492.41	0.7238	0.6657	1.02	0.62	1.32	1.02	2.49	2.85	1.15	5.44	1.41	0.78	0.03	0.03	0	0.14	0.19	0.1	0.06	0.19	0.07	0
tran	NA	NA	LTCONS_00242336	XM_017000865.1	chr5	140244304	140245097	794	+	chr1	11012634	11030528	3989	+	-504.62	0.9136	0.6383	1.02	0.62	1.32	1.02	2.49	2.85	1.15	5.44	1.41	0.78	2.52	1.96	1.87	2.08	2.63	4.23	2.29	5.23	1.55	1.34
cis_mRNA_dw20k	18675	NA	LTCONS_00242376	NM_000591.3	chr5	140596529	140613054	542	+	chr5	140631728	140633450	1635	-	*	0.721	0.6687	0.88	0	0.2	0.53	0.43	0	0.42	0.07	0.11	0.14	10.85	6.29	5.6	5.69	10.74	1.83	6.63	4.79	3.92	7.55
cis_mRNA_dw20k	19203	NA	LTCONS_00242877	NM_000024.5	chr5	148847836	148857101	9266	+	chr5	148826593	148828634	2042	+	*	0.8398	0.8303	0.09	0.04	0.16	0.1	0.34	0.14	0.61	0.3	0.06	0.84	1.96	0.82	1.72	2.8	2.24	1.61	4.1	3.21	1.16	3.85
cis_mRNA_overlap	0	Lnc-CompleteIn-mRNAIntron	LTCONS_00242918	MTCONS_00242902	chr5	149191999	149192516	518	+	chr5	149141483	149260439	8679	+	*	0.8839	0.8909	0.98	0.58	5.28	1.22	2.71	0.37	8.45	1.39	1.31	4.79	1.24	0.59	2.77	1.12	2.17	0.64	6.88	2.75	0.65	1.95
cis_mRNA_overlap	0	Lnc-CompleteIn-mRNAIntron	LTCONS_00242918	MTCONS_00242905	chr5	149191999	149192516	518	+	chr5	149141483	149260439	7732	+	*	0.8395	0.8424	0.98	0.58	5.28	1.22	2.71	0.37	8.45	1.39	1.31	4.79	0.69	0.51	1.28	0.74	1.24	0.27	5.26	1.46	0.3	0.96
cis_mRNA_overlap	0	Lnc-CompleteIn-mRNAIntron	LTCONS_00242918	XM_005268394.1	chr5	149191999	149192516	518	+	chr5	149141502	149260439	4141	+	*	0.8969	0.6918	0.98	0.58	5.28	1.22	2.71	0.37	8.45	1.39	1.31	4.79	0	0.14	0.31	0	0.15	0	0.78	0	0	0.11
cis_mRNA_overlap	0	Lnc-CompleteIn-mRNAIntron	LTCONS_00242918	XM_011537609.2	chr5	149191999	149192516	518	+	chr5	149141502	149242484	3166	+	*	0.6385	0.676	0.98	0.58	5.28	1.22	2.71	0.37	8.45	1.39	1.31	4.79	0	0	0	0	0.05	0	0.14	0.04	0	0.25
cis_mRNA_overlap	0	Lnc-CompleteIn-mRNAIntron	LTCONS_00242918	XM_017009238.1	chr5	149191999	149192516	518	+	chr5	149141762	149260439	4136	+	*	0.8395	0.7939	0.98	0.58	5.28	1.22	2.71	0.37	8.45	1.39	1.31	4.79	3.75	4.82	6.02	2.51	11.33	1.47	22.15	6.96	1.75	7.72
cis_mRNA_overlap	0	Lnc-CompleteIn-mRNAExon	LTCONS_00243735	NM_001305395.1	chr5	170232970	170246231	402	+	chr5	170232917	170246231	713	+	-148.33	0.9731	0.862	0	1.45	0	0	0.11	0	0	0	1.04	0	0	0.88	0	0	0	0	0	0	0.39	0
cis_mRNA_overlap	0	Lnc-AntiCompleteIn-mRNAIntron	LTCONS_00244386	XM_006714936.3	chr5	178338327	178346096	5297	+	chr5	178237616	178590285	2808	-	*	0.6185	0.6228	1.24	0.26	1.17	1.31	0.19	0.48	1.88	0.03	0.28	1.36	0	0	0	0.03	0	0	0.24	0	0	0
cis_mRNA_overlap	0	Lnc-AntiCompleteIn-mRNAIntron	LTCONS_00244386	XM_011534692.2	chr5	178338327	178346096	5297	+	chr5	178237616	178576301	3896	-	*	0.7449	0.7531	1.24	0.26	1.17	1.31	0.19	0.48	1.88	0.03	0.28	1.36	0.02	0	0	0	0	0	0.07	0	0	0.03
cis_mRNA_dw20k	2	NA	LTCONS_00244595	NM_033342.3	chr5	181191890	181203117	6704	+	chr5	181203118	181205293	1228	-	*	0.9872	0.8268	0.01	0.03	0	0.01	0	0.21	0	0	0.04	0	0.02	0.15	0	0.06	0.05	0.93	0	0.04	0.06	0
cis_mRNA_overlap	0	Lnc-Overlap-mRNA	LTCONS_00245350	NM_001288717.1	chr5	11662263	11904067	62171	-	chr5	10971840	11904043	4916	-	*	0.9969	0.7418	0.12	0.02	0.25	0.05	0.4	4.17	0.24	0.12	0.03	0.18	0.12	0	0.06	0	0.07	2.91	0.06	0	0	0
cis_mRNA_overlap	0	Lnc-Overlap-mRNA	LTCONS_00245350	XM_005248252.2	chr5	11662263	11904067	62171	-	chr5	10972531	11903588	5055	-	*	0.9937	0.8003	0.12	0.02	0.25	0.05	0.4	4.17	0.24	0.12	0.03	0.18	0	0	0.14	0	0.1	1.05	0	0	0	0
cis_mRNA_overlap	0	Lnc-AntiOverlap-mRNA	LTCONS_00246483	NM_016640.3	chr5	44767681	44811125	40643	-	chr5	44808925	44815514	1670	+	*	0.6241	0.7629	0	0	0.05	0.03	0.11	0.09	0.06	0.12	0	0	7.77	8.78	8.17	7.84	9.15	19.14	7.78	13.1	6.02	7.52
cis_mRNA_dw20k	7521	NA	LTCONS_00246850	NM_001145208.1	chr5	60588148	60589392	1245	-	chr5	60596912	60700166	2318	-	*	0.692	0.7073	0	0	0	0	0	0.28	0	0.12	0	0	0.12	0	0	0.03	0.03	0.15	0	0.22	0.05	0
cis_mRNA_dw20k	7521	NA	LTCONS_00246850	NM_018369.2	chr5	60588148	60589392	1245	-	chr5	60596912	60700166	2504	-	*	0.9385	0.7006	0	0	0	0	0	0.28	0	0.12	0	0	0.33	0.36	0.14	0.22	0.9	3.58	0.09	2.9	0.05	0
cis_mRNA_dw20k	7521	NA	LTCONS_00246850	XM_011543509.2	chr5	60588148	60589392	1245	-	chr5	60596912	60687838	2497	-	*	0.958	0.7894	0	0	0	0	0	0.28	0	0.12	0	0	0	0	0	0	0	0.79	0	0.16	0.13	0.04
cis_mRNA_overlap	0	Lnc-AntiCompleteIn-mRNAIntron	LTCONS_00247228	XM_017008913.1	chr5	69514542	69516481	1940	-	chr5	69492763	69558104	6046	+	*	0.9761	0.6228	0.26	0.18	0.79	0.17	1.2	11.54	0.69	1.58	2.51	0.76	0	0	0	0	0	0.8	0	0.13	0	0
tran	NA	NA	LTCONS_00247228	MTCONS_00284468	chr5	69514542	69516481	1940	-	chr7	47959768	47979625	5870	-	-1269.9	0.7182	0.7091	0.26	0.18	0.79	0.17	1.2	11.54	0.69	1.58	2.51	0.76	1.47	1.49	2.08	1.27	2.88	4.36	2.41	3.1	1.57	3.24
cis_mRNA_dw20k	6318	NA	LTCONS_00247587	NM_032367.2	chr5	77060815	77070390	9576	-	chr5	77076707	77087205	1419	-	*	0.8608	0.6575	0.04	0.01	0.06	0.06	0.11	0.9	0.08	0.16	0.04	0.1	0.3	0.41	0.47	0.85	0.47	1.57	0.44	0.87	0.18	0.2
cis_mRNA_overlap	0	Lnc-Overlap-mRNA	LTCONS_00248681	NM_001289004.1	chr5	102371782	102502213	5236	-	chr5	102371782	102499016	2503	-	-1183.49	0.8413	0.9753	0	0.14	0	0	0	0	0	0	0.13	0	0	0.15	0	0	0	0	0	0	0.48	0
cis_mRNA_overlap	0	Lnc-Overlap-mRNA	LTCONS_00248681	NM_001308014.1	chr5	102371782	102502213	5236	-	chr5	102371782	102499016	1878	-	-926.48	0.9932	0.862	0	0.14	0	0	0	0	0	0	0.13	0	0	1.37	0	0	0	0.02	0	0	1.03	0
cis_mRNA_overlap	0	Lnc-Overlap-mRNA	LTCONS_00248681	XM_005271874.3	chr5	102371782	102502213	5236	-	chr5	102371943	102502213	5728	-	-2046.98	0.9218	0.9753	0	0.14	0	0	0	0	0	0	0.13	0	0	0.01	0	0	0	0	0	0	0.02	0
cis_mRNA_overlap	0	Lnc-Overlap-mRNA	LTCONS_00248682	XM_005271874.3	chr5	102371782	102502213	5381	-	chr5	102371943	102502213	5728	-	-2073.37	0.6285	0.9753	0	0.26	0	0	0	0	0	0	0.08	0	0	0.01	0	0	0	0	0	0	0.02	0
cis_mRNA_overlap	0	mRNA-CompleteIn-LncExon	LTCONS_00248682	NM_001308014.1	chr5	102371782	102502213	5381	-	chr5	102371782	102499016	1878	-	-926.48	0.9297	0.862	0	0.26	0	0	0	0	0	0	0.08	0	0	1.37	0	0	0	0.02	0	0	1.03	0
cis_mRNA_overlap	0	Lnc-CompleteIn-mRNAIntron	LTCONS_00248971	NM_022140.3	chr5	112229816	112231259	1444	-	chr5	112162618	112419313	4707	-	*	0.8	0.8268	0.46	0.08	1.05	0.17	0.48	0.2	0.83	0.07	0.08	0.79	1.23	0.2	1.19	0.45	0.55	0.15	1.58	0.07	0.17	0.56
cis_mRNA_overlap	0	Lnc-CompleteIn-mRNAIntron	LTCONS_00249309	XM_011543520.2	chr5	124724906	124731439	6534	-	chr5	124638271	124746896	6125	-	*	0.7636	0.7112	0.07	0.04	0.23	0.1	0.67	1.05	0.26	0.38	0.05	0.34	0	0.09	0.03	0.07	0.38	0.33	0.26	0.26	0.17	0.12
cis_mRNA_overlap	0	mRNA-AntiCompleteIn-LncIntron	LTCONS_00249929	NM_001135940.1	chr5	137812139	137889378	3082	-	chr5	137867856	137887851	1790	+	*	0.7118	0.682	0	0.07	0.13	0.23	0	0	0.41	0	0	0	0.01	0	0.07	0.35	0	0.02	0.15	0	0	0.02
cis_mRNA_up10k	156	NA	LTCONS_00250080	XM_017009820.1	chr5	139560608	139561131	524	-	chr5	139561286	139627692	2332	+	*	0.8361	0.7169	0	0	0.07	0.11	0	0.88	0	0.83	0	0	0.75	1.31	1.58	1.85	2.22	3.03	1.15	5.29	1.74	0.29
cis_mRNA_overlap	0	Lnc-Overlap-mRNA	LTCONS_00250440	XM_005268422.3	chr5	143409023	143435512	1198	-	chr5	143281138	143434802	3372	-	*	0.8414	0.8024	3.61	0.35	3.74	3.84	0.67	0.85	1.69	0.03	3.04	3.63	4.44	0.58	5.67	2.7	0.94	0	3.58	0	2	5.48
cis_mRNA_up10k	4440	NA	LTCONS_00250440	XM_005268419.3	chr5	143409023	143435512	1198	-	chr5	143281138	143404584	3310	-	*	-0.7633	-0.7379	3.61	0.35	3.74	3.84	0.67	0.85	1.69	0.03	3.04	3.63	0.37	1.1	0.17	0	3.16	5.13	0	6.41	0	0
cis_mRNA_up10k	4779	NA	LTCONS_00250440	XM_005268423.3	chr5	143409023	143435512	1198	-	chr5	143281138	143404245	3361	-	*	-0.6953	-0.6189	3.61	0.35	3.74	3.84	0.67	0.85	1.69	0.03	3.04	3.63	0	0	0	0	0.24	0.4	0	0.36	0	0
tran	NA	NA	LTCONS_00250565	MTCONS_00206877	chr5	148229458	148231024	1567	-	chr3	112664716	112820581	1361	+	-528.8	0.7066	0.8124	0	0.24	0.02	0.03	0.05	0.21	0	0.02	0.33	0.02	0.05	1.24	0.37	0.15	0.48	0.63	0.19	0.4	0.52	0.12
cis_mRNA_overlap	0	Lnc-Overlap-mRNA	LTCONS_00250717	XM_011537702.2	chr5	150892958	150905069	5876	-	chr5	150892958	150904980	4857	-	-1969.99	0.9901	0.6068	0.27	0.12	0.13	0.16	0.44	2.34	0.25	0.15	0.08	0.14	0	0	0	0	0.02	0.2	0	0.02	0	0
cis_mRNA_overlap	0	mRNA-CompleteIn-LncExon	LTCONS_00250717	NM_052860.2	chr5	150892958	150905069	5876	-	chr5	150894392	150904983	3268	-	-1401.94	0.9586	0.6065	0.27	0.12	0.13	0.16	0.44	2.34	0.25	0.15	0.08	0.14	0	0	0.11	0.36	0.35	1.62	0.23	0	0	0.33
cis_mRNA_dw20k	16572	NA	LTCONS_00251633	NM_014613.2	chr5	176526645	176538025	5452	-	chr5	176448355	176510074	4515	+	*	0.6321	0.8085	0.23	0.13	0.12	0.1	0.57	0.3	0.13	0.54	0.16	0.14	7.19	7.18	6.8	5.28	9.42	15.5	8.54	13.57	7.56	7.74
cis_mRNA_dw20k	19113	NA	LTCONS_00251971	XM_005265993.4	chr5	179629124	179632083	2960	-	chr5	179569134	179610012	2000	+	*	0.946	0.6319	0.11	0.04	0.2	0.04	0.23	1.42	0.07	0.33	0.04	0.13	1.86	2.17	1.23	0.97	3.09	6.76	1.57	1.97	1.13	1.69
cis_mRNA_dw20k	19113	NA	LTCONS_00251971	XM_017009892.1	chr5	179629124	179632083	2960	-	chr5	179567461	179610012	2426	+	*	0.7709	0.7153	0.11	0.04	0.2	0.04	0.23	1.42	0.07	0.33	0.04	0.13	0.3	0	0.08	0	0.36	0.75	0	0.56	0.32	0
cis_mRNA_up10k	5404	NA	LTCONS_00251971	MTCONS_00251957	chr5	179629124	179632083	2960	-	chr5	179614178	179623721	6463	-	*	0.7838	0.9387	0.11	0.04	0.2	0.04	0.23	1.42	0.07	0.33	0.04	0.13	19.07	14.81	21.46	12.68	19.4	33.95	18.91	31.57	12.4	22.33
cis_mRNA_up10k	5455	NA	LTCONS_00251971	XM_006714863.2	chr5	179629124	179632083	2960	-	chr5	179614178	179623670	2179	-	*	0.9557	0.6565	0.11	0.04	0.2	0.04	0.23	1.42	0.07	0.33	0.04	0.13	0.61	1.17	2.57	0.91	1.05	18.16	0.09	8.67	0.44	0.78
cis_mRNA_dw20k	15248	NA	LTCONS_00252422	XM_017009590.1	chr5	32209653	32211760	2108	.	chr5	32227007	32312811	5243	-	*	0.802	0.6212	0.04	0.02	0.04	0.09	0.02	0.01	0.2	0.01	0.04	0.02	0	0	0.06	0	0	0	0.17	0	0.09	0
cis_mRNA_dw20k	765	NA	LTCONS_00253003	MTCONS_00253006	chr5_GL339449v2_alt	962951	1003142	9568	-	chr5_GL339449v2_alt	1003906	1035092	1328	-	*	0.9262	0.6606	0.35	0.49	0.41	0.18	1.83	0.19	0.62	0.55	0.73	0.09	7.16	10.17	8.11	4.68	34.62	5.42	6.82	9.47	21.09	8.75
tran	NA	NA	LTCONS_00253003	XM_005248588.4	chr5_GL339449v2_alt	962951	1003142	9568	-	chr5	69560136	69592532	1662	+	-734.39	-0.6048	-0.7477	0.35	0.49	0.41	0.18	1.83	0.19	0.62	0.55	0.73	0.09	1.34	1.44	1.45	1.39	0.27	4.06	1.39	0.48	0.45	2.26
cis_mRNA_overlap	0	Lnc-AntiOverlap-mRNA	LTCONS_00253855	NM_006638.3	chr6	5003810	5056552	8602	+	chr6	4995046	5004063	1185	-	*	0.6215	0.768	0	0	0	0	0.04	0.02	0	0.03	0	0	1.72	2.02	1.86	1.05	2.39	7.73	2.25	8.28	1.42	1.49
cis_mRNA_overlap	0	Lnc-AntiOverlap-mRNA	LTCONS_00253856	NM_006638.3	chr6	5003810	5056552	8378	+	chr6	4995046	5004063	1185	-	*	0.674	0.7038	0	0.05	0.02	0.03	0.04	0.03	0.04	0.11	0	0	1.72	2.02	1.86	1.05	2.39	7.73	2.25	8.28	1.42	1.49
cis_mRNA_up10k	126	NA	LTCONS_00254566	NM_001128164.1	chr6	16761615	16779864	18156	+	chr6	16299112	16761490	10587	-	*	0.9085	0.6338	0.01	0	0	0	0	0.06	0	0.08	0	0	2.07	1.09	2.28	1.52	3.15	4.55	1.27	8.78	1.13	2.85
cis_mRNA_overlap	0	Lnc-CompleteIn-mRNAIntron	LTCONS_00254678	NM_001949.4	chr6	20403969	20405344	1376	+	chr6	20401906	20493714	5009	+	*	0.9038	0.6336	0.54	0.72	0.96	0.27	2.15	3.8	1.15	5.13	0.55	0.78	0.07	0	0	0	0.34	0.32	0.04	0.39	0.04	0
cis_mRNA_overlap	0	Lnc-Overlap-mRNA	LTCONS_00254977	MTCONS_00254966	chr6	25772196	25782931	6695	+	chr6	25754673	25782931	5652	+	-2511.96	0.9757	0.9605	1.39	0.99	1.82	0.5	3.48	6.67	1.36	8.1	1.36	2.13	2.87	1.73	2.72	1.3	5.01	6.05	2.17	8.33	1.81	2.73
cis_mRNA_overlap	0	Lnc-Overlap-mRNA	LTCONS_00254977	XM_011514215.2	chr6	25772196	25782931	6695	+	chr6	25754722	25776685	1907	+	*	0.9742	0.772	1.39	0.99	1.82	0.5	3.48	6.67	1.36	8.1	1.36	2.13	1.22	0.88	1.02	0.39	2.1	4.18	1.06	6.29	0.97	0.59
cis_mRNA_overlap	0	Lnc-Overlap-mRNA	LTCONS_00256212	NM_001171820.1	chr6	35342558	35356846	948	+	chr6	35342558	35428191	3453	+	*	0.905	0.6878	0.19	0.2	0.53	0.29	1.46	2.65	1.19	2.07	0.4	0.18	0.06	0	0	0.04	0.14	0.24	0.05	0.12	0	0
cis_mRNA_overlap	0	Lnc-Overlap-mRNA	LTCONS_00256212	NM_006238.4	chr6	35342558	35356846	948	+	chr6	35342558	35428191	3747	+	*	0.8178	0.7697	0.19	0.2	0.53	0.29	1.46	2.65	1.19	2.07	0.4	0.18	0.44	0.24	0.56	0	2.3	2.12	2.49	1.58	0.4	0.1
cis_mRNA_overlap	0	Lnc-Overlap-mRNA	LTCONS_00256212	XM_006715120.1	chr6	35342558	35356846	948	+	chr6	35342571	35428180	3889	+	*	0.7865	0.6338	0.19	0.2	0.53	0.29	1.46	2.65	1.19	2.07	0.4	0.18	0	0	0	0	0	0.26	0	0.1	0.07	0
cis_mRNA_overlap	0	Lnc-Overlap-mRNA	LTCONS_00256212	XM_006715123.1	chr6	35342558	35356846	948	+	chr6	35342571	35428180	3639	+	*	0.6641	0.8937	0.19	0.2	0.53	0.29	1.46	2.65	1.19	2.07	0.4	0.18	0	0	0.08	0	0.27	0.08	0.06	0.27	0.05	0
cis_mRNA_overlap	0	Lnc-Overlap-mRNA	LTCONS_00256212	XM_011514707.1	chr6	35342558	35356846	948	+	chr6	35342571	35428180	4486	+	*	0.6271	0.8268	0.19	0.2	0.53	0.29	1.46	2.65	1.19	2.07	0.4	0.18	0.05	0.14	0.11	0	0.32	0.84	1.26	0.35	0.29	0
cis_mRNA_overlap	0	Lnc-Overlap-mRNA	LTCONS_00256212	XM_017010972.1	chr6	35342558	35356846	948	+	chr6	35342571	35428180	4513	+	*	0.9325	0.8693	0.19	0.2	0.53	0.29	1.46	2.65	1.19	2.07	0.4	0.18	0.14	0.1	0.15	0.16	0.26	0.51	0.24	0.36	0	0
cis_mRNA_overlap	0	Lnc-Overlap-mRNA	LTCONS_00256485	NM_021943.2	chr6	37930416	38154624	2936	+	chr6	37819531	38154624	3334	+	-1681.62	0.8419	0.7176	0	0	0	0.1	0	0.47	0.21	0.58	0.09	0	2.99	3.93	1.5	3.04	6.61	7.21	4.95	12.53	4.79	1.61
cis_mRNA_overlap	0	Lnc-Overlap-mRNA	LTCONS_00256485	XM_005249269.1	chr6	37930416	38154624	2936	+	chr6	37819496	38154624	3303	+	-1696.36	0.9304	0.6701	0	0	0	0.1	0	0.47	0.21	0.58	0.09	0	0.3	0	0	0	0	1.04	0.17	1.8	0	0
cis_mRNA_overlap	0	Lnc-CompleteIn-mRNAIntron	LTCONS_00256767	NM_001318819.1	chr6	42757397	42763995	5194	+	chr6	42746958	42868560	6784	+	*	0.6606	0.6608	0	0.02	0	0	0.31	0.22	0	0.31	0.02	0.03	0.53	0	0.48	0.21	0.85	0.76	0.06	0.81	0.29	0.92
cis_mRNA_up10k	134	NA	LTCONS_00256989	MTCONS_00256990	chr6	43768453	43770076	1624	+	chr6	43770209	43786487	5424	+	*	0.9356	0.7647	0	0	0.04	0	0	0.06	0.02	0.99	0	0	3.55	4.07	7.22	2.17	4.87	16.11	8.78	36.51	2.88	9.48
cis_mRNA_up10k	134	NA	LTCONS_00256989	MTCONS_00256992	chr6	43768453	43770076	1624	+	chr6	43770209	43786487	6218	+	*	0.9403	0.8424	0	0	0.04	0	0	0.06	0.02	0.99	0	0	2.34	0.75	2.64	1.02	1.76	8.15	2.09	18.27	1.02	0.88
cis_mRNA_up10k	134	NA	LTCONS_00256989	NM_001025366.2	chr6	43768453	43770076	1624	+	chr6	43770209	43786487	3662	+	*	0.7789	0.6139	0	0	0.04	0	0	0.06	0.02	0.99	0	0	0	0	0	0	0	0	0.03	0.04	0	0
cis_mRNA_up10k	134	NA	LTCONS_00256989	NM_001025369.2	chr6	43768453	43770076	1624	+	chr6	43770209	43786487	3504	+	*	0.9215	0.8485	0	0	0.04	0	0	0.06	0.02	0.99	0	0	0	0	0	0	0	0.09	0.03	0.2	0	0
cis_mRNA_up10k	134	NA	LTCONS_00256989	NM_001025370.2	chr6	43768453	43770076	1624	+	chr6	43770209	43786487	3407	+	*	0.9875	0.7568	0	0	0.04	0	0	0.06	0.02	0.99	0	0	2.22	1.38	2.42	0.92	3.03	5.68	2.36	22.54	1.18	2.36
cis_mRNA_up10k	134	NA	LTCONS_00256989	NM_001171623.1	chr6	43768453	43770076	1624	+	chr6	43770209	43786487	3662	+	*	0.7789	0.6139	0	0	0.04	0	0	0.06	0.02	0.99	0	0	0	0	0	0	0	0	0.03	0.04	0	0
cis_mRNA_up10k	134	NA	LTCONS_00256989	NM_001171627.1	chr6	43768453	43770076	1624	+	chr6	43770209	43786487	3504	+	*	0.7958	0.8485	0	0	0.04	0	0	0.06	0.02	0.99	0	0	0	0	0	0	0	0.09	0.03	0.12	0	0
cis_mRNA_up10k	134	NA	LTCONS_00256989	NM_001171628.1	chr6	43768453	43770076	1624	+	chr6	43770209	43786487	3407	+	*	0.9875	0.7568	0	0	0.04	0	0	0.06	0.02	0.99	0	0	2.22	1.38	2.42	0.92	3.03	5.68	2.36	22.54	1.18	2.36
cis_mRNA_up10k	134	NA	LTCONS_00256989	NM_001204385.1	chr6	43768453	43770076	1624	+	chr6	43770209	43786487	3479	+	*	0.7857	0.7598	0	0	0.04	0	0	0.06	0.02	0.99	0	0	0.04	0	0.04	0	0	0.24	0.15	0.41	0	0.2
cis_mRNA_up10k	1910	NA	LTCONS_00256989	NM_001287044.1	chr6	43768453	43770076	1624	+	chr6	43771985	43786487	2552	+	*	0.9899	0.7033	0	0	0.04	0	0	0.06	0.02	0.99	0	0	6.03	3.63	8.65	3.51	10.55	17.14	9.14	73.54	5.79	8.81
cis_mRNA_overlap	0	Lnc-Overlap-mRNA	LTCONS_00257166	NM_004277.4	chr6	46652915	46704319	14270	+	chr6	46652915	46678190	2986	+	*	0.7727	0.6024	0.35	0.31	0.6	0.35	0.14	0.48	0.62	0.3	0.15	1.21	0.25	0.09	0.25	0.44	0.04	0.31	0.14	0.24	0.24	0.76
cis_mRNA_up10k	111	NA	LTCONS_00257166	XM_017010921.1	chr6	46652915	46704319	14270	+	chr6	46581580	46652805	3475	-	*	0.7323	0.7052	0.35	0.31	0.6	0.35	0.14	0.48	0.62	0.3	0.15	1.21	0.55	0	0.82	0.91	0.06	0.07	0.66	0.02	0.13	1.12
cis_mRNA_up10k	111	NA	LTCONS_00257166	XM_017010924.1	chr6	46652915	46704319	14270	+	chr6	46549706	46652805	2185	-	*	0.6545	0.693	0.35	0.31	0.6	0.35	0.14	0.48	0.62	0.3	0.15	1.21	1.92	0.57	4.02	3.77	0.02	0.32	3.39	0.11	0.78	3.76
cis_mRNA_up10k	86	NA	LTCONS_00257166	NM_016593.4	chr6	46652915	46704319	14270	+	chr6	46549580	46652830	2444	-	*	0.6258	0.6261	0.35	0.31	0.6	0.35	0.14	0.48	0.62	0.3	0.15	1.21	12.6	2.64	16.23	19.25	1.26	0.17	7.73	0.07	2.35	20.05
cis_mRNA_overlap	0	Lnc-CompleteIn-mRNAIntron	LTCONS_00258516	XM_017010289.1	chr6	89146620	89147719	1100	+	chr6	89146050	89161770	1509	+	*	0.7696	0.6342	0.76	0.7	1.09	0.41	2.85	2.5	0.53	1.37	0.79	0.58	0.03	0.17	0.14	0	0.23	0.4	0.05	0.1	0.1	0.17
cis_mRNA_up10k	475	NA	LTCONS_00258516	XM_017010290.1	chr6	89146620	89147719	1100	+	chr6	89148193	89165565	4530	+	*	0.7426	0.7509	0.76	0.7	1.09	0.41	2.85	2.5	0.53	1.37	0.79	0.58	0.47	0.14	0	0	1.3	0.57	0.42	0.98	0.47	0
cis_mRNA_overlap	0	Lnc-AntiOverlap-mRNA	LTCONS_00258851	NM_015491.2	chr6	99424854	99464598	37506	+	chr6	99398051	99425345	5069	-	*	0.9122	0.7894	0	0	0	0.02	0.05	0.06	0	0	0.01	0	0	0	0	0	0.16	0.37	0	0	0	0
cis_mRNA_up10k	5493	NA	LTCONS_00258871	XM_005267175.3	chr6	99520977	99552804	21494	+	chr6	99458964	99515485	5264	-	*	0.6069	0.7683	0.09	0.09	0.19	0	0.31	0.16	0.1	0.49	0.12	0.12	0.3	0.22	0.6	0.18	0.83	0.82	0.38	0.71	0.34	0.86
cis_mRNA_up10k	5585	NA	LTCONS_00258871	XM_011536200.2	chr6	99520977	99552804	21494	+	chr6	99432325	99515393	7199	-	*	0.6899	0.7927	0.09	0.09	0.19	0	0.31	0.16	0.1	0.49	0.12	0.12	0.08	0.24	0.34	0.16	0.39	0.47	0.25	0.44	0.13	0.3
cis_mRNA_up10k	5492	NA	LTCONS_00258880	XM_005267172.3	chr6	99520977	99585206	1050	+	chr6	99432325	99515486	5787	-	*	0.696	0.7322	0.5	0	0	0	0	0	0.13	0	0.04	0	0.31	0.11	0.17	0.18	0	0.06	0.18	0.18	0.22	0.09
cis_mRNA_overlap	0	Lnc-Overlap-mRNA	LTCONS_00259163	NM_145315.4	chr6	108294874	108373070	1308	+	chr6	108294874	108525784	5011	+	-667.37	-0.6424	-0.657	0	0	0.31	0	0	0.15	0.45	0	0.03	0.51	0.52	0.52	0.27	0.56	0.39	0.49	0.47	0.47	0.38	0.2
cis_mRNA_overlap	0	Lnc-CompleteIn-mRNAIntron	LTCONS_00260524	NM_018945.3	chr6	135853968	135893317	39350	+	chr6	135851696	136195571	5387	+	*	0.8749	0.8909	0.56	0.02	3.94	2.09	0.13	0.1	0.5	0.04	0.88	0.69	1.92	0.39	2.74	2.17	0.25	0.18	0.76	0	0.95	0.92
cis_mRNA_overlap	0	Lnc-CompleteIn-mRNAIntron	LTCONS_00260525	NM_018945.3	chr6	135893421	135914473	21053	+	chr6	135851696	136195571	5387	+	*	0.8346	0.903	0.41	0.01	3.11	1.11	0.1	0.06	0.39	0.02	0.62	0.32	1.92	0.39	2.74	2.17	0.25	0.18	0.76	0	0.95	0.92
cis_mRNA_overlap	0	Lnc-CompleteIn-mRNAIntron	LTCONS_00260527	NM_018945.3	chr6	135990306	135993955	3650	+	chr6	135851696	136195571	5387	+	*	0.7305	0.7212	0.31	0.01	1.87	0.46	0.08	0.07	0.88	0.06	0.45	0.61	1.92	0.39	2.74	2.17	0.25	0.18	0.76	0	0.95	0.92
tran	NA	NA	LTCONS_00260814	MTCONS_00148663	chr6	141746029	141784506	651	+	chr19	9523224	9538673	7360	-	-661.56	-0.7492	-0.6247	0	0.17	0	0	0	0	0	0	0.8	0	0.86	0.37	0.58	0.36	0.62	0.82	0.58	0.47	0.08	0.74
tran	NA	NA	LTCONS_00260817	NM_001160113.1	chr6	141782358	142030489	2084	+	chr15	83007950	83011641	998	-	-493.82	0.8673	0.7056	0.05	0	0.04	0	0.39	0.18	0.16	0.14	0	0.03	0.45	0.5	0.27	0.16	0.92	0.51	0.47	0.62	0.33	0.24
cis_mRNA_overlap	0	Lnc-CompleteIn-mRNAIntron	LTCONS_00261302	XM_011535729.2	chr6	150916863	150995443	20604	+	chr6	150865738	151071817	5718	+	*	0.9465	0.7927	0.11	0.07	0.54	0.05	1.36	1.55	0.66	1.13	0.08	0.16	0.07	0.05	0.14	0.05	0.53	0.78	0.16	0.6	0.16	0.03
cis_mRNA_overlap	0	Lnc-CompleteIn-mRNAIntron	LTCONS_00261302	XM_017010702.1	chr6	150916863	150995443	20604	+	chr6	150865739	151099657	3213	+	*	0.7706	0.7382	0.11	0.07	0.54	0.05	1.36	1.55	0.66	1.13	0.08	0.16	0	0	0	0	0.21	0.13	0.08	0	0	0
cis_mRNA_overlap	0	Lnc-CompleteIn-mRNAIntron	LTCONS_00261302	XM_017010703.1	chr6	150916863	150995443	20604	+	chr6	150865739	151097890	4860	+	*	0.9412	0.8268	0.11	0.07	0.54	0.05	1.36	1.55	0.66	1.13	0.08	0.16	0.02	0.01	0.07	0.01	0.24	0.36	0.11	0.19	0.1	0
cis_mRNA_overlap	0	Lnc-CompleteIn-mRNAIntron	LTCONS_00261302	XM_017010708.1	chr6	150916863	150995443	20604	+	chr6	150865737	151008348	3012	+	*	0.8426	0.9152	0.11	0.07	0.54	0.05	1.36	1.55	0.66	1.13	0.08	0.16	0.05	0.12	0.17	0.02	0.58	0.39	0.35	0.23	0.09	0.21
cis_mRNA_overlap	0	Lnc-Overlap-mRNA	LTCONS_00261302	XM_005266911.4	chr6	150916863	150995443	20604	+	chr6	150865738	150960192	2927	+	*	0.8601	0.8268	0.11	0.07	0.54	0.05	1.36	1.55	0.66	1.13	0.08	0.16	0.12	0	0.24	0.12	0.23	0.47	0.13	0.44	0.07	0.09
cis_mRNA_overlap	0	Lnc-Overlap-mRNA	LTCONS_00261339	XM_011535547.2	chr6	151669315	151709902	40567	+	chr6	151690496	152079940	2888	+	*	0.701	0.7333	0.62	0.8	1.94	0.63	1.05	2.75	1.97	0.17	0.08	5.05	0.31	0.14	1.49	0.42	0.63	0.92	1.24	0.47	0.22	1.16
cis_mRNA_overlap	0	Lnc-Overlap-mRNA	LTCONS_00261339	XM_017010376.1	chr6	151669315	151709902	40567	+	chr6	151654148	152100752	6391	+	*	0.8422	0.8061	0.62	0.8	1.94	0.63	1.05	2.75	1.97	0.17	0.08	5.05	0.09	1.04	0.65	0.17	0.6	0.28	1.22	0.19	0	2.88
cis_mRNA_overlap	0	Lnc-CompleteIn-mRNAIntron	LTCONS_00261347	XM_011535547.2	chr6	151745394	151755118	9725	+	chr6	151690496	152079940	2888	+	*	0.7065	0.7295	0.69	0.85	1.93	0.79	0.85	1.6	2.09	0.09	0.13	4.68	0.31	0.14	1.49	0.42	0.63	0.92	1.24	0.47	0.22	1.16
cis_mRNA_overlap	0	Lnc-CompleteIn-mRNAIntron	LTCONS_00261347	XM_017010376.1	chr6	151745394	151755118	9725	+	chr6	151654148	152100752	6391	+	*	0.9135	0.8571	0.69	0.85	1.93	0.79	0.85	1.6	2.09	0.09	0.13	4.68	0.09	1.04	0.65	0.17	0.6	0.28	1.22	0.19	0	2.88
cis_mRNA_dw20k	14974	NA	LTCONS_00261675	XM_005267074.3	chr6	158650014	158656423	4736	+	chr6	158560086	158635041	4720	+	*	-0.6267	-0.6364	0.68	0.11	0.54	0.47	0.19	0.15	0.78	0.03	0.05	0.35	2.69	4.77	3.29	2.12	3.47	4.93	3.54	3.58	4.63	3.25
cis_mRNA_overlap	0	Lnc-Overlap-mRNA	LTCONS_00261675	NM_001242395.1	chr6	158650014	158656423	4736	+	chr6	158650014	158764876	2692	+	*	0.7273	0.7647	0.68	0.11	0.54	0.47	0.19	0.15	0.78	0.03	0.05	0.35	0.31	0	0.59	0.62	0	0	0.32	0	0	0
cis_mRNA_overlap	0	Lnc-Overlap-mRNA	LTCONS_00261675	XM_006715606.3	chr6	158650014	158656423	4736	+	chr6	158644899	158766298	4429	+	*	0.9084	0.8986	0.68	0.11	0.54	0.47	0.19	0.15	0.78	0.03	0.05	0.35	0.13	0	0.05	0.04	0.01	0	0.15	0	0	0
cis_mRNA_dw20k	2440	NA	LTCONS_00262622	XM_017011610.1	chr6	1261467	1303572	8778	-	chr6	1306011	1312404	5196	-	*	0.9246	0.7229	0	0	0	0	0	0.1	0	0.05	0	0	0.03	0	0.08	0.02	0	0.2	0.04	0.12	0	0
cis_mRNA_overlap	0	Lnc-AntiOverlap-mRNA	LTCONS_00262669	NM_033260.3	chr6	1306011	1313915	2915	-	chr6	1312440	1314758	2319	+	*	0.9772	0.6305	0	0	0.05	0	0	0	0	0.38	0	0	0.09	0	0.3	0	0.01	0.52	0.08	2.42	0	0.04
cis_mRNA_overlap	0	Lnc-AntiOverlap-mRNA	LTCONS_00262670	NM_033260.3	chr6	1306011	1313915	3346	-	chr6	1312440	1314758	2319	+	*	0.978	0.6305	0	0	0.03	0	0	0	0	0.38	0	0	0.09	0	0.3	0	0.01	0.52	0.08	2.42	0	0.04
cis_mRNA_dw20k	15275	NA	LTCONS_00263821	NM_001267040.1	chr6	15537316	15540720	3405	-	chr6	15248855	15522042	5597	+	*	0.7222	0.6904	0.1	0.03	0.17	0.03	0.78	0.83	0.25	0.85	0.11	0.25	0	0	0.01	0	0	0.21	0.05	0.12	0	0
cis_mRNA_dw20k	15275	NA	LTCONS_00263821	NM_004973.3	chr6	15537316	15540720	3405	-	chr6	15245975	15522042	6097	+	*	0.8808	0.8681	0.1	0.03	0.17	0.03	0.78	0.83	0.25	0.85	0.11	0.25	0.91	0.82	1.32	0.69	1.73	3.26	1.73	3.74	1.09	0.82
cis_mRNA_dw20k	15436	NA	LTCONS_00263821	XM_017010833.1	chr6	15537316	15540720	3405	-	chr6	15245975	15521881	6080	+	*	0.6738	0.6449	0.1	0.03	0.17	0.03	0.78	0.83	0.25	0.85	0.11	0.25	0	0.05	0.02	0	0	0.31	0.22	0.41	0	0.14
cis_mRNA_overlap	0	Lnc-CompleteIn-mRNAIntron	LTCONS_00263821	MTCONS_00263810	chr6	15537316	15540720	3405	-	chr6	15522566	15663058	2377	-	*	0.7435	0.6688	0.1	0.03	0.17	0.03	0.78	0.83	0.25	0.85	0.11	0.25	0.11	0.02	0.07	0.02	0.13	0.13	0.15	0.24	0.02	0
cis_mRNA_overlap	0	Lnc-CompleteIn-mRNAIntron	LTCONS_00263821	NM_183040.2	chr6	15537316	15540720	3405	-	chr6	15523563	15663058	1963	-	*	0.8978	0.9266	0.1	0.03	0.17	0.03	0.78	0.83	0.25	0.85	0.11	0.25	0.11	0	0.12	0.04	0.26	0.46	0.28	0.48	0.16	0.12
cis_mRNA_overlap	0	Lnc-CompleteIn-mRNAIntron	LTCONS_00263821	XM_011514937.2	chr6	15537316	15540720	3405	-	chr6	15522803	15586181	1180	-	*	0.7824	0.7853	0.1	0.03	0.17	0.03	0.78	0.83	0.25	0.85	0.11	0.25	0.16	0	0.14	0.16	0.52	1.21	0.35	0.45	0	0.51
cis_mRNA_overlap	0	Lnc-CompleteIn-mRNAIntron	LTCONS_00263822	MTCONS_00263810	chr6	15557236	15567225	9990	-	chr6	15522566	15663058	2377	-	*	0.6984	0.747	0.11	0.05	0.49	0.1	0.86	1.8	0.54	1.43	0.09	0.49	0.11	0.02	0.07	0.02	0.13	0.13	0.15	0.24	0.02	0
cis_mRNA_overlap	0	Lnc-CompleteIn-mRNAIntron	LTCONS_00263822	NM_183040.2	chr6	15557236	15567225	9990	-	chr6	15523563	15663058	1963	-	*	0.9253	0.8537	0.11	0.05	0.49	0.1	0.86	1.8	0.54	1.43	0.09	0.49	0.11	0	0.12	0.04	0.26	0.46	0.28	0.48	0.16	0.12
cis_mRNA_overlap	0	Lnc-CompleteIn-mRNAIntron	LTCONS_00263822	XM_011514937.2	chr6	15557236	15567225	9990	-	chr6	15522803	15586181	1180	-	*	0.8821	0.8685	0.11	0.05	0.49	0.1	0.86	1.8	0.54	1.43	0.09	0.49	0.16	0	0.14	0.16	0.52	1.21	0.35	0.45	0	0.51
cis_mRNA_overlap	0	Lnc-AntiOverlap-mRNA	LTCONS_00264221	MTCONS_00254966	chr6	25680129	25757319	4237	-	chr6	25754673	25782931	5652	+	*	0.8059	0.6074	0.34	0.18	0.21	0.21	0.56	0.45	0.17	0.94	0.58	0.21	2.87	1.73	2.72	1.3	5.01	6.05	2.17	8.33	1.81	2.73
cis_mRNA_up10k	7875	NA	LTCONS_00264227	NM_170745.3	chr6	25734436	25740612	6177	-	chr6	25726063	25726562	500	-	*	0.6545	0.8651	0.12	0.04	0.26	0.1	1.01	0.52	0.18	1.31	0.2	0.35	0	0	0.07	0	0.47	0.31	0.15	0.16	0.12	0.21
cis_mRNA_overlap	0	Lnc-AntiOverlap-mRNA	LTCONS_00264287	NM_005321.2	chr6	26156706	26157891	1186	-	chr6	26156331	26157115	785	+	-927	0.9694	0.9058	0.31	0.16	0.28	0.08	0.55	1.46	0.46	0.48	0.12	0.12	75.08	40.91	54.99	31.74	94.22	311.55	69.74	122.26	51.85	67.82
cis_mRNA_up10k	231	NA	LTCONS_00264287	NM_021063.3	chr6	26156706	26157891	1186	-	chr6	26158121	26158607	487	+	*	0.9404	0.7052	0.31	0.16	0.28	0.08	0.55	1.46	0.46	0.48	0.12	0.12	27.07	25.6	11.73	12.42	38.33	314.56	14.48	79.24	18.91	18.64
cis_mRNA_dw20k	15251	NA	LTCONS_00264411	NM_003536.2	chr6	27825786	27826816	1031	-	chr6	27810064	27810536	473	+	*	0.7213	0.7173	0.37	0.93	0.27	0.07	0.29	1.26	0.61	1.72	0.24	0.61	20.33	23.01	5.12	10.35	12.32	70.62	5.5	35.43	8.52	11.1
tran	NA	NA	LTCONS_00264411	MTCONS_00284468	chr6	27825786	27826816	1031	-	chr7	47959768	47979625	5870	-	-1155.85	0.6075	0.6201	0.37	0.93	0.27	0.07	0.29	1.26	0.61	1.72	0.24	0.61	1.47	1.49	2.08	1.27	2.88	4.36	2.41	3.1	1.57	3.24
cis_mRNA_overlap	0	Lnc-Overlap-mRNA	LTCONS_00265077	NM_002125.3	chr6	32517343	32560002	1285	-	chr6	32517374	32530229	1171	-	-696.1	0.7199	0.9596	0.48	0.19	0.15	0	0.11	0.38	0	0	0	2.39	94.91	39.47	42.93	0.74	34.9	70.53	0	0	0.6	98.65
cis_mRNA_up10k	212	NA	LTCONS_00265378	XM_005249011.3	chr6	36139967	36197206	8538	-	chr6	36197417	36232790	6029	+	*	0.8602	0.862	0	0	0	0	0	0.13	0.01	0.12	0	0	0	0	0	0	0	0.91	0	0.24	0	0
cis_mRNA_up10k	3092	NA	LTCONS_00265378	XM_011514490.1	chr6	36139967	36197206	8538	-	chr6	36200297	36230419	4021	+	*	0.9013	0.7531	0	0	0	0	0	0.13	0.01	0.12	0	0	0.64	0.25	0.44	0.04	1.25	2.88	0.67	1.84	0.3	0.23
cis_mRNA_up10k	3092	NA	LTCONS_00265378	XM_011514492.1	chr6	36139967	36197206	8538	-	chr6	36200297	36214066	2715	+	*	0.8555	0.7531	0	0	0	0	0	0.13	0.01	0.12	0	0	0.34	0.14	0.5	0	1.23	2.4	0.83	1.53	0.45	0.04
cis_mRNA_up10k	212	NA	LTCONS_00265392	XM_005249011.3	chr6	36155773	36197206	3627	-	chr6	36197417	36232790	6029	+	*	0.9221	0.6305	0	0.02	0	0.03	0.18	0.52	0	0.16	0.01	0.14	0	0	0	0	0	0.91	0	0.24	0	0
cis_mRNA_up10k	212	NA	LTCONS_00265393	XM_005249011.3	chr6	36155773	36197206	4219	-	chr6	36197417	36232790	6029	+	*	0.6752	0.7699	0	0.03	0.02	0	0	0.13	0	0.2	0	0	0	0	0	0	0	0.91	0	0.24	0	0
cis_mRNA_dw20k	4188	NA	LTCONS_00265604	NM_005943.5	chr6	39881804	39900071	6279	-	chr6	39904258	39927716	4163	-	*	0.9709	0.6147	0.02	0	0	0.04	0	0	0	0.58	0	0	0	0	0	0.01	0.16	0	0	0.72	0	0
cis_mRNA_overlap	0	Lnc-AntiOverlap-mRNA	LTCONS_00265604	XM_006715043.2	chr6	39881804	39900071	6279	-	chr6	39792366	39904870	6223	+	*	0.9128	0.862	0.02	0	0	0.04	0	0	0	0.58	0	0	0	0	0	0.12	0	0	0	0.24	0	0
cis_mRNA_dw20k	2811	NA	LTCONS_00265607	MTCONS_00265616	chr6	39883516	39900071	6334	-	chr6	39902881	39934551	5346	-	*	0.9617	0.6805	0	0	0	0.03	0	0.15	0.11	0.71	0.04	0.14	0.11	0.15	0.31	0.01	0.14	0.81	0.7	1.97	0.11	0.48
cis_mRNA_dw20k	4188	NA	LTCONS_00265607	NM_001075098.3	chr6	39883516	39900071	6334	-	chr6	39904258	39934551	4159	-	*	0.7667	0.9129	0	0	0	0.03	0	0.15	0.11	0.71	0.04	0.14	0.9	1.18	1.58	2.11	0.4	4.83	2.23	5.07	1.23	3.63
cis_mRNA_dw20k	4199	NA	LTCONS_00265607	XM_011514633.2	chr6	39883516	39900071	6334	-	chr6	39904269	39934462	3996	-	*	0.7302	0.6053	0	0	0	0.03	0	0.15	0.11	0.71	0.04	0.14	0.38	0.45	0.12	0	0.04	0.92	0.38	0.97	0.32	0.4
cis_mRNA_overlap	0	Lnc-AntiOverlap-mRNA	LTCONS_00265607	XM_017010630.1	chr6	39883516	39900071	6334	-	chr6	39793413	39904870	7462	+	*	0.8444	0.7366	0	0	0	0.03	0	0.15	0.11	0.71	0.04	0.14	0	0	0.15	0.13	0.04	0.24	0.13	0.38	0	0.17
cis_mRNA_dw20k	2024	NA	LTCONS_00265938	MTCONS_00256883	chr6	43305473	43310705	3209	-	chr6	43298260	43303450	1859	+	*	-0.6982	-0.6444	0.09	0.17	0.11	0.06	0.14	0.32	0.07	1.91	0.07	0	11.8	1.4	9.44	9.45	9.75	4.51	8.21	0	7.22	11.73
cis_mRNA_overlap	0	Lnc-AntiOverlap-mRNA	LTCONS_00265938	NM_006672.3	chr6	43305473	43310705	3209	-	chr6	43298260	43305538	2553	+	*	-0.832	-0.6991	0.09	0.17	0.11	0.06	0.14	0.32	0.07	1.91	0.07	0	58.55	22.48	44.84	47.93	41.23	44.42	42.52	0.8	58.92	45.93
cis_mRNA_overlap	0	Lnc-Overlap-mRNA	LTCONS_00265938	XM_017010857.1	chr6	43305473	43310705	3209	-	chr6	43305513	43310705	2816	-	-1489.43	0.9615	0.7028	0.09	0.17	0.11	0.06	0.14	0.32	0.07	1.91	0.07	0	0	0	0	0	0	0.02	0	0.05	0	0
cis_mRNA_overlap	0	Lnc-CompleteIn-mRNAIntron	LTCONS_00266107	NM_001261823.1	chr6	45158371	45159460	1090	-	chr6	44826730	45378051	4233	-	*	0.7273	0.6282	0.05	0	0.3	0.24	0.54	1.52	0.2	1.35	0.16	0.86	0	0	0	0	0.15	0.11	0.01	0.28	0	0
cis_mRNA_overlap	0	Lnc-CompleteIn-mRNAIntron	LTCONS_00266107	XM_011514951.2	chr6	45158371	45159460	1090	-	chr6	44828739	45372720	6447	-	*	0.9235	0.845	0.05	0	0.3	0.24	0.54	1.52	0.2	1.35	0.16	0.86	0.08	0	0.13	0	0.45	0.68	0.15	0.88	0.03	0.28
cis_mRNA_overlap	0	Lnc-CompleteIn-mRNAIntron	LTCONS_00266107	XM_017011371.1	chr6	45158371	45159460	1090	-	chr6	44828739	45371774	5490	-	*	0.9019	0.6121	0.05	0	0.3	0.24	0.54	1.52	0.2	1.35	0.16	0.86	0.07	0.16	0.11	0.02	0.43	1.02	0.06	0.81	0.05	0.14
cis_mRNA_overlap	0	Lnc-CompleteIn-mRNAIntron	LTCONS_00266112	NM_001261823.1	chr6	45331917	45355361	23445	-	chr6	44826730	45378051	4233	-	*	0.8334	0.7989	0.22	0.28	0.4	0.16	1.06	3.03	0.44	2.94	0.17	0.76	0	0	0	0	0.15	0.11	0.01	0.28	0	0
cis_mRNA_overlap	0	Lnc-CompleteIn-mRNAIntron	LTCONS_00266112	XM_011514951.2	chr6	45331917	45355361	23445	-	chr6	44828739	45372720	6447	-	*	0.9597	0.9362	0.22	0.28	0.4	0.16	1.06	3.03	0.44	2.94	0.17	0.76	0.08	0	0.13	0	0.45	0.68	0.15	0.88	0.03	0.28
cis_mRNA_overlap	0	Lnc-CompleteIn-mRNAIntron	LTCONS_00266112	XM_017011371.1	chr6	45331917	45355361	23445	-	chr6	44828739	45371774	5490	-	*	0.9784	0.8788	0.22	0.28	0.4	0.16	1.06	3.03	0.44	2.94	0.17	0.76	0.07	0.16	0.11	0.02	0.43	1.02	0.06	0.81	0.05	0.14
cis_mRNA_overlap	0	Lnc-CompleteIn-mRNAIntron	LTCONS_00266113	NM_001261823.1	chr6	45358266	45361476	3211	-	chr6	44826730	45378051	4233	-	*	0.8567	0.7807	0.23	0.23	0.59	0.31	1.28	3.18	0.39	3.21	0.13	0.7	0	0	0	0	0.15	0.11	0.01	0.28	0	0
cis_mRNA_overlap	0	Lnc-CompleteIn-mRNAIntron	LTCONS_00266113	XM_011514951.2	chr6	45358266	45361476	3211	-	chr6	44828739	45372720	6447	-	*	0.9647	0.9055	0.23	0.23	0.59	0.31	1.28	3.18	0.39	3.21	0.13	0.7	0.08	0	0.13	0	0.45	0.68	0.15	0.88	0.03	0.28
cis_mRNA_overlap	0	Lnc-CompleteIn-mRNAIntron	LTCONS_00266113	XM_017011371.1	chr6	45358266	45361476	3211	-	chr6	44828739	45371774	5490	-	*	0.9772	0.7538	0.23	0.23	0.59	0.31	1.28	3.18	0.39	3.21	0.13	0.7	0.07	0.16	0.11	0.02	0.43	1.02	0.06	0.81	0.05	0.14
cis_mRNA_dw20k	5365	NA	LTCONS_00266399	XM_017010492.1	chr6	52995626	52995935	310	-	chr6	53001299	53061819	6319	-	*	0.7611	0.7382	6.82	12.07	7.05	5.42	20.42	16.98	9.06	5.67	22.2	10.04	0	0.01	0	0	0.14	0	0	0	0.07	0
cis_mRNA_up10k	2022	NA	LTCONS_00266436	NM_001498.3	chr6	53547150	53548043	894	-	chr6	53497341	53545129	3813	-	*	0.7224	0.6768	0	0.28	0.1	0.08	0.04	1.16	0.21	1.12	0.28	0	13.7	29.98	14.88	12.3	10.16	21.91	10.72	74.16	24.25	12.4
cis_mRNA_up10k	2432	NA	LTCONS_00266436	XM_017010749.1	chr6	53547150	53548043	894	-	chr6	53497517	53544719	3262	-	*	0.7363	0.8232	0	0.28	0.1	0.08	0.04	1.16	0.21	1.12	0.28	0	6.81	14.17	8.6	6.02	9.06	14.23	10.3	49.64	14.03	9.21
tran	NA	NA	LTCONS_00266441	MTCONS_00220538	chr6	53561289	53617172	3761	-	chr3	197577779	197627881	3760	-	-3073.83	0.6482	0.8667	0.38	1.3	0.39	0.25	1.68	1.86	0.28	1.21	3.12	0.47	1.54	2.28	2.05	1.37	3.19	3.24	1.34	4.97	3.45	2.11
cis_mRNA_overlap	0	Lnc-AntiOverlap-mRNA	LTCONS_00266621	XM_005248889.1	chr6	57012351	57084568	21872	-	chr6	57014474	57027652	2174	+	*	0.9205	0.6532	0.01	0.01	0.02	0.01	0.03	1.48	0.03	0.03	0.01	0.02	0	0	0	0	0	0.12	0.05	0	0	0
cis_mRNA_overlap	0	mRNA-AntiCompleteIn-LncIntron	LTCONS_00266621	NM_001286274.1	chr6	57012351	57084568	21872	-	chr6	57046532	57055239	2883	+	*	0.6748	0.6484	0.01	0.01	0.02	0.01	0.03	1.48	0.03	0.03	0.01	0.02	0.1	0.16	0.19	0.29	0.14	0.67	0.31	0.33	0	0.56
cis_mRNA_overlap	0	mRNA-AntiCompleteIn-LncIntron	LTCONS_00266621	NM_020931.3	chr6	57012351	57084568	21872	-	chr6	57046532	57055239	2964	+	*	0.7509	0.7691	0.01	0.01	0.02	0.01	0.03	1.48	0.03	0.03	0.01	0.02	2.04	1.9	1.88	1.56	2.29	6.84	1.97	5.88	1.38	1.92
cis_mRNA_overlap	0	mRNA-AntiCompleteIn-LncIntron	LTCONS_00266621	XM_011514767.2	chr6	57012351	57084568	21872	-	chr6	57046691	57055739	589	+	*	0.6378	0.8899	0.01	0.01	0.02	0.01	0.03	1.48	0.03	0.03	0.01	0.02	0.59	0.61	1.08	0.47	1.51	1.89	0.91	1.53	0.87	1.15
cis_mRNA_up10k	5443	NA	LTCONS_00266621	NM_001257273.1	chr6	57012351	57084568	21872	-	chr6	57090010	57109716	9544	+	*	0.9532	0.7056	0.01	0.01	0.02	0.01	0.03	1.48	0.03	0.03	0.01	0.02	0.79	0.96	1.04	0.5	2.11	5.88	0.91	1.91	1.01	0.88
tran	NA	NA	LTCONS_00266867	MTCONS_00008697	chr6	70938432	70938729	298	-	chr1	116123174	116137095	4722	+	-567	0.712	0.7818	1.53	0.93	1.3	0	4.88	3.26	1.59	2.12	0.54	0.26	3.21	3.37	7.55	2.15	12.09	12.76	9.37	12.02	4.23	9.23
tran	NA	NA	LTCONS_00266867	MTCONS_00252987	chr6	70938432	70938729	298	-	chr5_GL339449v2_alt	451402	485735	7891	-	-175.56	0.61	0.697	1.53	0.93	1.3	0	4.88	3.26	1.59	2.12	0.54	0.26	2.61	1.96	5.88	2.24	7.81	8.42	5.67	7.86	2.41	7.65
cis_mRNA_overlap	0	Lnc-CompleteIn-mRNAIntron	LTCONS_00267574	NM_080743.4	chr6	89113558	89114179	622	-	chr6	89095959	89118081	3599	-	*	0.7851	0.6139	0	0	0.11	0	0.36	0.93	0	0	0.04	0	0	0	0	0	0	0.16	0	0	0.09	0
cis_mRNA_overlap	0	Lnc-CompleteIn-mRNAIntron	LTCONS_00267657	XM_017011167.1	chr6	90159521	90189453	29933	-	chr6	89938184	90296912	3814	-	*	0.9585	0.8554	1.13	0.19	1.63	0.42	0.86	0.79	4.11	1.13	0.24	1.94	0.16	0	0.18	0	0	0.02	0.65	0.07	0.01	0.13
cis_mRNA_overlap	0	Lnc-Overlap-mRNA	LTCONS_00267658	NM_001170794.1	chr6	90189566	90296371	60975	-	chr6	89926528	90296908	9109	-	*	0.8348	0.6698	1.3	0.08	1.01	0.31	0.18	0.07	2.65	0.38	0.07	2.25	0.12	0.06	0.05	0	0	0	0.19	0.1	0.1	0.22
cis_mRNA_overlap	0	Lnc-Overlap-mRNA	LTCONS_00267658	XM_017011166.1	chr6	90189566	90296371	60975	-	chr6	89926528	90296912	9364	-	*	0.7337	0.789	1.3	0.08	1.01	0.31	0.18	0.07	2.65	0.38	0.07	2.25	0.02	0	0	0	0	0	0.02	0	0	0.08
cis_mRNA_overlap	0	Lnc-Overlap-mRNA	LTCONS_00267658	XM_017011167.1	chr6	90189566	90296371	60975	-	chr6	89938184	90296912	3814	-	*	0.8343	0.7508	1.3	0.08	1.01	0.31	0.18	0.07	2.65	0.38	0.07	2.25	0.16	0	0.18	0	0	0.02	0.65	0.07	0.01	0.13
cis_mRNA_overlap	0	Lnc-Overlap-mRNA	LTCONS_00268115	MTCONS_00268153	chr6	107697297	107737889	9342	-	chr6	107718955	107824610	2209	-	*	0.8018	0.9938	0	0	0	0.1	0.02	0	0	0	0	0	0	0	0	0.04	0.04	0	0	0	0	0
cis_mRNA_dw20k	2585	NA	LTCONS_00268562	NM_021648.4	chr6	116225830	116247380	4210	-	chr6	116249964	116254098	4135	-	*	0.819	0.6801	0.02	0.03	0.03	0.05	0.05	0.78	0.02	0.02	0.05	0.02	2.04	2.51	1.91	2.36	1.43	4.92	1.24	0.7	3.23	1.85
cis_mRNA_overlap	0	Lnc-AntiOverlap-mRNA	LTCONS_00268562	MTCONS_00259697	chr6	116225830	116247380	4210	-	chr6	116100833	116245690	3860	+	*	0.8707	0.8288	0.02	0.03	0.03	0.05	0.05	0.78	0.02	0.02	0.05	0.02	0.12	0.33	0.33	0.28	0.25	0.91	0.04	0.22	0.51	0.23
cis_mRNA_overlap	0	Lnc-Overlap-mRNA	LTCONS_00270550	MTCONS_00270544	chr6	160531483	160532904	782	-	chr6	160453151	160679520	5282	-	-446.98	0.832	0.6438	0	2.66	1.19	0.47	0.81	0.12	0.16	0.38	1.25	0	0	2.27	0.86	0	1.45	0	0	0.06	0	0
tran	76502	NA	LTCONS_00270550	XM_017011203.1	chr6	160531483	160532904	782	-	chr6	160350567	160454982	5272	+	-1087.94	0.8466	0.7028	0	2.66	1.19	0.47	0.81	0.12	0.16	0.38	1.25	0	0	0.26	0	0	0	0	0	0	0.2	0
cis_mRNA_overlap	0	Lnc-Overlap-mRNA	LTCONS_00270767	NM_001270879.1	chr6	166364919	166383013	13561	-	chr6	166364919	166383013	1193	-	*	0.875	0.697	3.7	1.55	4.76	1.33	2.95	3.07	8.12	1.12	0.81	8.54	1.07	0.37	0.65	0.66	0.07	0.52	1.84	0.08	0.45	1.66
cis_mRNA_overlap	0	Lnc-Overlap-mRNA	LTCONS_00270767	XM_011535894.1	chr6	166364919	166383013	13561	-	chr6	166364919	166369739	1976	-	*	0.7496	0.6444	3.7	1.55	4.76	1.33	2.95	3.07	8.12	1.12	0.81	8.54	0.23	0.04	0.28	0.22	0.42	0.32	0.37	0	0.28	0.73
cis_mRNA_overlap	0	mRNA-CompleteIn-LncExon	LTCONS_00270768	NM_001270879.1	chr6	166364919	166383013	4226	-	chr6	166364919	166383013	1193	-	-586.68	0.9423	0.8545	7.19	2.21	7.95	2.97	2.23	3.9	12.64	1.26	1.97	12.59	1.07	0.37	0.65	0.66	0.07	0.52	1.84	0.08	0.45	1.66
cis_mRNA_overlap	0	mRNA-CompleteIn-LncExon	LTCONS_00270768	XM_011535894.1	chr6	166364919	166383013	4226	-	chr6	166364919	166369739	1976	-	-807.92	0.6705	0.614	7.19	2.21	7.95	2.97	2.23	3.9	12.64	1.26	1.97	12.59	0.23	0.04	0.28	0.22	0.42	0.32	0.37	0	0.28	0.73
cis_mRNA_dw20k	14664	NA	LTCONS_00271665	XM_017011168.1	chr6	126053939	126055546	1608	.	chr6	125986540	126039276	1761	+	*	0.7788	0.6856	0	0.23	0.23	0	0	0	0	0.43	0	0	0	0.06	0.08	0.06	0	0	0.14	0.27	0	0
tran	NA	NA	LTCONS_00273109	NM_001025091.1	chr6_GL000254v2_alt	1934624	1935188	565	+	chr6	30571393	30591532	3464	+	-391.98	0.6873	0.6228	0	0	0	0	0.28	0	0	1.76	0	0	7.54	7.16	7.56	5.8	12.3	35.8	10.25	38.1	8.28	6.99
cis_mRNA_dw20k	482	NA	LTCONS_00273232	MTCONS_00273233	chr6_GL000254v2_alt	817894	820423	2530	-	chr6_GL000254v2_alt	820904	825262	1035	-	*	0.7201	0.8909	9.78	20.97	0.33	0.46	10.23	5.88	1.75	19.81	19.83	0	90.14	234.04	18.72	7.07	286.93	77.42	56.17	651.68	144.78	1.38
cis_mRNA_dw20k	2061	NA	LTCONS_00274575	XM_011515150.2	chr7	2721690	2722397	708	+	chr7	2688202	2719630	8562	+	*	0.999	0.7115	0	0	0	0	0	0	0.09	0.87	0	0	0.02	0.01	0.05	0.01	0.02	0.01	0.11	1.09	0	0.03
cis_mRNA_dw20k	5709	NA	LTCONS_00274575	NM_001282440.1	chr7	2721690	2722397	708	+	chr7	2728105	2763140	4246	-	*	0.8455	0.6305	0	0	0	0	0	0	0.09	0.87	0	0	0	0	0.13	0.08	0.32	0.19	0.3	0.65	0	0.11
cis_mRNA_dw20k	10090	NA	LTCONS_00274984	XM_017012811.1	chr7	11180902	11285931	38458	+	chr7	10973834	11170813	4690	+	*	0.8076	0.6006	0.02	0	0.65	0	0	0.01	0.25	0.09	0.01	0.96	0.13	0.06	0.1	0.04	0.02	0.07	0.05	0.04	0.07	0.3
cis_mRNA_dw20k	7997	NA	LTCONS_00274995	XM_017012817.1	chr7	11194706	11285931	37974	+	chr7	10973837	11186710	2591	+	*	-0.6621	-0.6606	0.37	0.28	1.6	0.75	0.13	0.31	0.92	0	0.23	3.56	0.7	0.49	0.28	0.76	0.74	1.71	0.43	1.36	0.62	0
cis_mRNA_dw20k	6585	NA	LTCONS_00275173	NM_014399.3	chr7	16791120	16793295	2176	+	chr7	16753726	16784536	1902	+	*	0.7805	0.893	0.09	0.01	0.09	0.07	0.07	0.03	0.23	0	0	0.71	4.33	0.72	5.09	7.75	4.14	3.65	18.29	1	1.27	16.06
cis_mRNA_up10k	4884	NA	LTCONS_00276782	MTCONS_00276783	chr7	45880684	45883477	1747	+	chr7	45888360	45893668	3763	+	*	0.713	0.6505	0.57	0.13	0.33	0.31	0	0.26	0.44	0.05	0.26	0.47	74.83	46.72	42.66	73.46	10.44	42.36	116.38	58.48	83.45	113.76
tran	NA	NA	LTCONS_00277514	MTCONS_00016670	chr7	65328523	65328953	431	+	chr1	6221193	6235984	4922	-	-382.07	0.8384	0.8128	0	0	0	0	0.1	1.15	0	0.2	0	0	0.67	0.91	0.81	0.23	1.49	2.46	0.54	1.72	0.33	0.68
cis_mRNA_overlap	0	Lnc-CompleteIn-mRNAIntron	LTCONS_00277745	NM_001127232.2	chr7	69926989	69996918	69908	+	chr7	69598919	70290786	1814	+	*	0.9833	0.7957	0.15	0.06	0.4	0.15	0.29	1.1	0.37	2.1	0.09	0.32	0.05	0.06	0.15	0.11	0	1.17	0.11	2.09	0.1	0.13
cis_mRNA_overlap	0	Lnc-CompleteIn-mRNAIntron	LTCONS_00277748	NM_015570.3	chr7	70596219	70642161	45910	+	chr7	69598919	70793068	6587	+	*	0.7326	0.6098	0.14	0.03	1.27	0.13	0.2	0.57	1.31	0.74	0.05	0.56	0	0	0.16	0.12	0	0	0.12	0.1	0	0.05
cis_mRNA_overlap	0	Lnc-CompleteIn-mRNAIntron	LTCONS_00277751	NM_015570.3	chr7	70731640	70755788	24111	+	chr7	69598919	70793068	6587	+	*	0.6381	0.6572	0.18	0.06	1.21	0.08	0.41	0.59	1.15	0.64	0.06	0.81	0	0	0.16	0.12	0	0	0.12	0.1	0	0.05
cis_mRNA_up10k	8963	NA	LTCONS_00277751	XM_005250257.2	chr7	70731640	70755788	24111	+	chr7	70764750	70792871	4464	+	*	-0.6128	-0.6506	0.18	0.06	1.21	0.08	0.41	0.59	1.15	0.64	0.06	0.81	0	0.14	0	0.26	0	0	0	0	0.08	0.01
cis_mRNA_overlap	0	Lnc-AntiOverlap-mRNA	LTCONS_00278167	XM_017012844.1	chr7	79452175	79471961	6575	+	chr7	78017055	79453805	7242	-	*	0.9016	0.7845	0	0	0	0.02	0	0	0	0	0	0.02	0.16	0	0	0.3	0	0	0	0.03	0	0.25
cis_mRNA_dw20k	7497	NA	LTCONS_00278557	NM_001040665.1	chr7	90245174	90287571	4748	+	chr7	90211860	90237678	6696	+	*	0.9438	0.8891	0	0	0.23	0.08	0.24	0.08	0	0.69	0.09	0	0	0	0.18	0.11	0.84	0.06	0.16	5.08	0.36	0
cis_mRNA_dw20k	7497	NA	LTCONS_00278557	NM_001244946.1	chr7	90245174	90287571	4748	+	chr7	90211860	90237678	2142	+	*	0.8292	0.7252	0	0	0.23	0.08	0.24	0.08	0	0.69	0.09	0	0	0	0	0	0.09	0	0	0.1	0	0
cis_mRNA_dw20k	7497	NA	LTCONS_00278557	NM_152999.3	chr7	90245174	90287571	4748	+	chr7	90211686	90237678	6920	+	*	0.9083	0.7299	0	0	0.23	0.08	0.24	0.08	0	0.69	0.09	0	0	1.27	0.35	0.3	2.25	0.06	0.25	5.09	0.33	0
cis_mRNA_overlap	0	Lnc-Overlap-mRNA	LTCONS_00278569	XM_005250600.3	chr7	90245174	90320964	5777	+	chr7	90245195	90288272	1951	+	-863.3	0.9459	0.8232	0	0.11	0.09	0.37	0	0.31	0.35	0	0	0.07	0	0	0	0.13	0	0.12	0.09	0	0	0
cis_mRNA_overlap	0	Lnc-Overlap-mRNA	LTCONS_00278909	NM_001135557.1	chr7	95772506	95825053	15047	+	chr7	95772506	96098424	2935	+	*	0.985	0.8209	0.05	0.02	0.08	0.03	2.29	0.67	0.08	6.05	0.03	0.09	0	0	0	0	0.45	0.21	0.09	2.2	0	0
cis_mRNA_overlap	0	Lnc-Overlap-mRNA	LTCONS_00278909	XM_011515862.1	chr7	95772506	95825053	15047	+	chr7	95802680	96098426	2844	+	*	0.9737	0.6767	0.05	0.02	0.08	0.03	2.29	0.67	0.08	6.05	0.03	0.09	0	0	0	0.1	1.11	0.91	0	2.67	0	0
cis_mRNA_overlap	0	Lnc-Overlap-mRNA	LTCONS_00278909	XM_017011804.1	chr7	95772506	95825053	15047	+	chr7	95772784	96098426	3635	+	*	0.9604	0.6767	0.05	0.02	0.08	0.03	2.29	0.67	0.08	6.05	0.03	0.09	0	0	0	0.02	0.1	0.07	0	1.1	0	0
cis_mRNA_overlap	0	Lnc-Overlap-mRNA	LTCONS_00278909	XM_017011806.1	chr7	95772506	95825053	15047	+	chr7	95772506	96041823	2148	+	*	0.9038	0.6767	0.05	0.02	0.08	0.03	2.29	0.67	0.08	6.05	0.03	0.09	0	0	0	0.06	0.69	0.12	0	0.74	0	0
cis_mRNA_overlap	0	Lnc-Overlap-mRNA	LTCONS_00278909	XM_017011807.1	chr7	95772506	95825053	15047	+	chr7	95772552	96002851	2899	+	*	0.9718	0.83	0.05	0.02	0.08	0.03	2.29	0.67	0.08	6.05	0.03	0.09	0	0	0.12	0	0.52	0.15	0	0.85	0.01	0.01
cis_mRNA_up10k	88	NA	LTCONS_00280029	MTCONS_00280030	chr7	116672042	116672272	231	+	chr7	116672359	116798386	6744	+	*	0.8217	0.7301	0.45	0.48	0	0.64	4.69	0.81	0	0.28	1.55	0	0.25	0.63	0.39	1.12	1.48	0.56	0.51	0.28	1.03	0.36
cis_mRNA_overlap	0	Lnc-CompleteIn-mRNAIntron	LTCONS_00280567	MTCONS_00280563	chr7	129612319	129647352	34936	+	chr7	129611702	129757082	3545	+	*	0.9549	0.9758	0.25	0.2	0.63	0.17	1.61	2.92	0.75	1.64	0.32	0.84	0.68	0.72	0.79	0.55	1.63	1.84	0.87	1.58	0.78	1.03
cis_mRNA_up10k	4839	NA	LTCONS_00280866	NM_001321387.1	chr7	137348703	137351477	2775	+	chr7	137227341	137343865	1611	-	*	0.9236	0.6681	0.02	11.37	0	0.02	0	0	0	0	0.02	0	0.24	1.21	0.27	0.39	0	0	0	0	0	0
cis_mRNA_overlap	0	Lnc-Overlap-mRNA	LTCONS_00281880	NM_001291913.1	chr7	155961296	155969541	5345	+	chr7	155962632	155966343	2536	+	-1250.2	0.9827	0.9626	0.04	0	0.04	0.77	0	2.28	2.7	8.26	0.57	1.18	0	0	0	0.06	0	0.26	0.23	1.47	0.02	0.09
cis_mRNA_overlap	0	Lnc-Overlap-mRNA	LTCONS_00281880	XM_017012200.1	chr7	155961296	155969541	5345	+	chr7	155962557	155965658	1700	+	-1010.6	0.9782	0.928	0.04	0	0.04	0.77	0	2.28	2.7	8.26	0.57	1.18	0.02	0	0	0.07	0	1.02	1.38	2.78	0	0.46
cis_mRNA_overlap	0	Lnc-Overlap-mRNA	LTCONS_00282494	XM_011515667.2	chr7	4125823	4137206	3326	-	chr7	4127503	4137206	4508	-	-2007.43	0.9661	0.8746	0.01	0.01	0.05	0.24	0.17	0.86	0.03	0	0.16	0.15	0.02	0	0.04	0.06	0.16	0.43	0.01	0.01	0.06	0.08
cis_mRNA_overlap	0	Lnc-CompleteIn-mRNAIntron	LTCONS_00282827	MTCONS_00282826	chr7	11585480	11586049	570	-	chr7	11460401	11832198	3118	-	*	0.83	0.7295	0.15	0.1	0.06	0.05	0.73	0.2	0.19	0	0.6	0	0.3	0.52	0.28	0.33	1.07	0.42	0.25	0.1	0.48	0.22
cis_mRNA_overlap	0	Lnc-CompleteIn-mRNAIntron	LTCONS_00282827	XM_006715662.1	chr7	11585480	11586049	570	-	chr7	11370435	11832197	10202	-	*	0.8654	0.8106	0.15	0.1	0.06	0.05	0.73	0.2	0.19	0	0.6	0	0.11	0	0.06	0	0.24	0.12	0	0	0.14	0
cis_mRNA_overlap	0	Lnc-CompleteIn-mRNAIntron	LTCONS_00282827	XM_011515193.2	chr7	11585480	11586049	570	-	chr7	11370435	11727685	12909	-	*	0.7659	0.6037	0.15	0.1	0.06	0.05	0.73	0.2	0.19	0	0.6	0	0.09	0.14	0.07	0.1	0.63	0.06	0.07	0.05	0.11	0.02
cis_mRNA_dw20k	6559	NA	LTCONS_00283446	XM_017012771.1	chr7	26647737	26648214	478	-	chr7	26654772	26864705	4528	-	*	0.7508	0.7455	0.58	0	0.99	0	0.17	0	0.31	0.09	0	0.23	0.19	0.15	0.24	0.06	0.2	0.06	0.15	0.17	0.11	0.13
cis_mRNA_overlap	0	Lnc-CompleteIn-mRNAIntron	LTCONS_00283516	NM_175061.3	chr7	28154077	28177329	23253	-	chr7	27830573	28180818	3200	-	*	0.8943	0.7576	0.43	0.27	1.04	0.25	1.88	3.44	1.5	3.24	0.24	0.72	1.26	1.98	0.99	0.74	2.17	7.15	1.3	4.86	0.43	0.3
cis_mRNA_dw20k	12058	NA	LTCONS_00283814	NM_015283.1	chr7	34346512	34916824	5351	-	chr7	34928881	35038041	4865	-	*	0.8249	0.7006	0	0	0	0	0	0.44	0	0	0	0.01	4.79	2.81	4.05	4.5	4	7.42	4.76	4.08	3.88	5.48
cis_mRNA_dw20k	1060	NA	LTCONS_00283906	XM_011515335.2	chr7	36509317	36510983	1667	-	chr7	36512042	36724474	3467	-	*	0.8848	0.7896	0.56	0.15	0.62	0.23	0.13	0.11	0.58	0.02	0.11	0.33	0.47	0.03	0.36	0.2	0.13	0.15	0.49	0	0	0.05
cis_mRNA_dw20k	1060	NA	LTCONS_00283906	XM_011515342.2	chr7	36509317	36510983	1667	-	chr7	36512042	36597781	2358	-	*	0.8995	0.8483	0.56	0.15	0.62	0.23	0.13	0.11	0.58	0.02	0.11	0.33	0.21	0	0.47	0.08	0	0.08	0.27	0	0	0.08
cis_mRNA_dw20k	12648	NA	LTCONS_00283906	XM_011515339.2	chr7	36509317	36510983	1667	-	chr7	36523630	36724494	6590	-	*	0.8076	0.8328	0.56	0.15	0.62	0.23	0.13	0.11	0.58	0.02	0.11	0.33	0.24	0.08	0.4	0.26	0.27	0.11	0.44	0.04	0.06	0.37
cis_mRNA_dw20k	17842	NA	LTCONS_00283906	XM_011515340.2	chr7	36509317	36510983	1667	-	chr7	36528824	36724494	2267	-	*	0.8816	0.8632	0.56	0.15	0.62	0.23	0.13	0.11	0.58	0.02	0.11	0.33	0.39	0.06	0.74	0.38	0.31	0.08	0.55	0.07	0.09	0.41
cis_mRNA_dw20k	1959	NA	LTCONS_00283906	NM_001637.3	chr7	36509317	36510983	1667	-	chr7	36512941	36724549	2440	-	*	0.6933	0.7903	0.56	0.15	0.62	0.23	0.13	0.11	0.58	0.02	0.11	0.33	4.5	1.43	1.82	2.11	1.11	0.95	1.84	0.1	0.45	1.08
cis_mRNA_dw20k	10378	NA	LTCONS_00284108	XM_017012596.1	chr7	42883186	42898896	15711	-	chr7	42909273	42911445	2055	-	*	0.6769	0.6241	0.11	0.11	0.25	0.1	0.54	0.9	0.2	0.35	0.15	0.34	0.12	0	0.15	0.05	0.27	0.21	0	0.17	0	0
cis_mRNA_overlap	0	mRNA-CompleteIn-LncIntron	LTCONS_00285131	MTCONS_00285145	chr7	66375602	66493566	15198	-	chr7	66422301	66423944	1644	-	*	0.6653	0.6079	0.05	0.01	0.34	0.11	0.07	0.02	0.22	0.15	0.02	0.2	0.16	0.22	0.56	0.36	0.3	0.58	0.77	0.51	0.21	0.53
cis_mRNA_dw20k	11044	NA	LTCONS_00286601	MTCONS_00286605	chr7	101272973	101274729	1757	-	chr7	101285772	101289788	2072	-	*	0.949	0.8936	0.21	0.26	1.2	1.08	0.14	0.21	0.82	0.16	0.51	1.33	1.62	1.23	6.6	5.96	1.09	1.83	4.64	1.17	1.63	5.19
cis_mRNA_dw20k	124	NA	LTCONS_00286601	MTCONS_00286602	chr7	101272973	101274729	1757	-	chr7	101274852	101289826	3071	-	*	0.8524	0.9119	0.21	0.26	1.2	1.08	0.14	0.21	0.82	0.16	0.51	1.33	0.39	0.23	0.81	1.48	0	0.05	0.61	0.07	0.69	0.93
cis_mRNA_dw20k	151	NA	LTCONS_00286604	MTCONS_00286605	chr7	101285118	101285622	505	-	chr7	101285772	101289788	2072	-	*	0.8972	0.8303	0.06	0.18	1.85	1.03	0.31	0.23	0.87	0	0.65	0.83	1.62	1.23	6.6	5.96	1.09	1.83	4.64	1.17	1.63	5.19
cis_mRNA_overlap	0	Lnc-CompleteIn-mRNAIntron	LTCONS_00286604	MTCONS_00286602	chr7	101285118	101285622	505	-	chr7	101274852	101289826	3071	-	*	0.6975	0.7091	0.06	0.18	1.85	1.03	0.31	0.23	0.87	0	0.65	0.83	0.39	0.23	0.81	1.48	0	0.05	0.61	0.07	0.69	0.93
cis_mRNA_overlap	0	Lnc-Overlap-mRNA	LTCONS_00287197	XM_017012701.1	chr7	110662645	110965336	3017	-	chr7	110833995	111562482	2243	-	*	0.9155	0.9362	0.03	0.09	0.23	0.04	1.11	0.38	0.25	0.16	0.15	0.17	0.09	0.17	0.79	0.05	1.38	0.52	0.59	0.19	0.19	0.21
cis_mRNA_overlap	0	Lnc-Overlap-mRNA	LTCONS_00287197	XM_017012703.1	chr7	110662645	110965336	3017	-	chr7	110879362	111562253	7350	-	*	0.9798	0.903	0.03	0.09	0.23	0.04	1.11	0.38	0.25	0.16	0.15	0.17	0.41	0.45	0.72	0.29	3.3	1.34	0.65	0.68	0.47	1.08
cis_mRNA_overlap	0	Lnc-Overlap-mRNA	LTCONS_00287197	XM_017012704.1	chr7	110662645	110965336	3017	-	chr7	110717443	111562253	9230	-	*	0.9885	0.924	0.03	0.09	0.23	0.04	1.11	0.38	0.25	0.16	0.15	0.17	0.11	0.1	0.29	0.11	1.7	0.45	0.38	0.37	0.17	0.27
cis_mRNA_overlap	0	Lnc-Overlap-mRNA	LTCONS_00287219	XM_011516611.2	chr7	111434837	111562531	52783	-	chr7	111386106	111562253	1726	-	*	0.9849	0.9879	1.09	1.14	2.83	1.03	13.79	5.35	2.75	4.79	1.38	3.85	0.36	0.63	1.23	0.35	10.02	2.28	1.39	2.19	0.7	1.99
cis_mRNA_overlap	0	Lnc-Overlap-mRNA	LTCONS_00287219	XM_017012701.1	chr7	111434837	111562531	52783	-	chr7	110833995	111562482	2243	-	*	0.8414	0.7842	1.09	1.14	2.83	1.03	13.79	5.35	2.75	4.79	1.38	3.85	0.09	0.17	0.79	0.05	1.38	0.52	0.59	0.19	0.19	0.21
cis_mRNA_overlap	0	Lnc-Overlap-mRNA	LTCONS_00287219	XM_017012702.1	chr7	111434837	111562531	52783	-	chr7	110833995	111562531	2360	-	*	0.9586	0.6018	1.09	1.14	2.83	1.03	13.79	5.35	2.75	4.79	1.38	3.85	0.1	0	0.06	0.18	1.61	0.35	0	0.41	0.07	0.5
cis_mRNA_overlap	0	Lnc-Overlap-mRNA	LTCONS_00287219	XM_017012703.1	chr7	111434837	111562531	52783	-	chr7	110879362	111562253	7350	-	*	0.9793	0.9636	1.09	1.14	2.83	1.03	13.79	5.35	2.75	4.79	1.38	3.85	0.41	0.45	0.72	0.29	3.3	1.34	0.65	0.68	0.47	1.08
cis_mRNA_overlap	0	Lnc-Overlap-mRNA	LTCONS_00287219	XM_017012704.1	chr7	111434837	111562531	52783	-	chr7	110717443	111562253	9230	-	*	0.9783	0.8754	1.09	1.14	2.83	1.03	13.79	5.35	2.75	4.79	1.38	3.85	0.11	0.1	0.29	0.11	1.7	0.45	0.38	0.37	0.17	0.27
cis_mRNA_overlap	0	Lnc-AntiOverlap-mRNA	LTCONS_00287355	XM_005250258.1	chr7	116235756	116499547	4382	-	chr7	116210539	116258786	2653	+	*	0.7776	0.6305	0	0	0	0	0.07	0.06	0	0	0	0	0	0	0	0.06	1.23	0.3	0.29	0.37	0.19	0.09
cis_mRNA_overlap	0	mRNA-CompleteIn-LncIntron	LTCONS_00287355	MTCONS_00287397	chr7	116235756	116499547	4382	-	chr7	116475967	116479895	3929	-	*	0.9795	0.6875	0	0	0	0	0.07	0.06	0	0	0	0	0.07	0.06	0.18	0.06	1.06	1.08	0.09	0.09	0.17	0.29
cis_mRNA_up10k	498	NA	LTCONS_00287355	NM_001206748.1	chr7	116235756	116499547	4382	-	chr7	116500044	116508541	2975	+	*	0.7958	0.6875	0	0	0	0	0.07	0.06	0	0	0	0	0.16	0.25	0.18	0.05	0.6	1.34	0.25	0	0.46	0
cis_mRNA_up10k	55	NA	LTCONS_00287355	NM_001206747.1	chr7	116235756	116499547	4382	-	chr7	116499601	116508541	3090	+	*	0.9152	0.6833	0	0	0	0	0.07	0.06	0	0	0	0	4.48	8.72	4.61	4.14	24.11	34.26	0	1.38	9.49	7.07
cis_mRNA_up10k	55	NA	LTCONS_00287355	NM_198212.2	chr7	116235756	116499547	4382	-	chr7	116499601	116508541	2902	+	*	0.7359	0.6896	0	0	0	0	0.07	0.06	0	0	0	0	0.1	0	0.1	0.17	0.2	0.23	0.04	0.04	0	0.12
cis_mRNA_up10k	1775	NA	LTCONS_00287791	NM_001458.4	chr7	128826551	128828655	2105	-	chr7	128830429	128859274	9138	+	*	0.999	0.7006	0	0	0	0	0.94	0	0	0	0.04	0	0.12	0.15	0.13	0.2	131.18	0.17	0	0.51	11.45	0.06
cis_mRNA_overlap	0	Lnc-AntiOverlap-mRNA	LTCONS_00288524	XM_006715928.3	chr7	143719220	143726500	7281	-	chr7	143702051	143725083	3835	+	-4565.95	0.6517	0.924	0.28	0.04	0.34	0.2	0.51	0.75	0.25	0.33	1.52	0.09	0.09	0	0.2	0.1	0.56	0.61	0.01	0.15	0.38	0
tran	166292	NA	LTCONS_00288529	XM_017012897.1	chr7	143811968	143821088	2248	-	chr7	143620924	143645677	2962	+	-1212.54	0.9814	0.8229	0	0	0.15	0.14	0.17	0.42	0.02	0.08	2.07	0	0	0.03	0.11	0.19	0.27	0.12	0	0	1.45	0
cis_mRNA_up10k	178	NA	LTCONS_00288581	NM_005435.3	chr7	144307145	144355219	659	-	chr7	144355396	144380632	5488	+	*	0.6281	0.834	0	0	0	0	0.43	0.58	0.05	0.65	0.3	0	1.61	1.19	2.3	0.52	7.62	3.23	2.79	3.8	1.95	1.65
cis_mRNA_dw20k	3398	NA	LTCONS_00288710	XM_011515901.2	chr7	148807372	148810669	1780	-	chr7	148814066	148853085	3992	-	*	0.7451	0.7218	0.08	0.1	0.15	0.09	0.27	2.11	0.33	1.12	0.14	0.16	0	0	0	0	0.06	0.06	0	0.06	0	0
cis_mRNA_dw20k	6267	NA	LTCONS_00288710	XM_011516629.2	chr7	148807372	148810669	1780	-	chr7	148699950	148801106	3197	+	*	0.6574	0.8896	0.08	0.1	0.15	0.09	0.27	2.11	0.33	1.12	0.14	0.16	0	0	0.23	0.12	0.16	0.61	0.4	1.36	0	0.34
cis_mRNA_overlap	0	Lnc-Overlap-mRNA	LTCONS_00288710	XM_005249963.4	chr7	148807372	148810669	1780	-	chr7	148807377	148853080	5117	-	-867.12	0.9751	0.7745	0.08	0.1	0.15	0.09	0.27	2.11	0.33	1.12	0.14	0.16	0	0	0	0	0.03	1.04	0	0.3	0	0.03
cis_mRNA_overlap	0	Lnc-Overlap-mRNA	LTCONS_00288710	XM_011515891.2	chr7	148807372	148810669	1780	-	chr7	148807378	148884662	2777	-	-829.28	0.9919	0.7006	0.08	0.1	0.15	0.09	0.27	2.11	0.33	1.12	0.14	0.16	0	0	0	0	0	0.09	0	0.04	0	0
cis_mRNA_overlap	0	Lnc-Overlap-mRNA	LTCONS_00288710	XM_017011821.1	chr7	148807372	148810669	1780	-	chr7	148807377	148884321	2854	-	-828.04	0.8979	0.6037	0.08	0.1	0.15	0.09	0.27	2.11	0.33	1.12	0.14	0.16	0.25	0	0.12	0	0.6	2.05	0.12	0.39	0.36	0.15
cis_mRNA_overlap	0	Lnc-AntiCompleteIn-mRNAIntron	LTCONS_00289632	MTCONS_00276882	chr7	48148478	48152980	4503	.	chr7	48110425	48244918	1783	+	*	0.8399	0.8866	0.01	0	0.03	0.02	0	0	0.03	0	0	0.05	0.09	0.04	0.15	0.22	0.11	0	0.32	0	0	1.39
cis_mRNA_dw20k	11197	NA	LTCONS_00290143	MTCONS_00290138	chr8	2156652	2199476	4550	+	chr8	2133003	2145456	1146	+	*	0.9739	0.6153	0	0	0.01	0.51	0.03	0.02	0.02	0.01	0.19	0	0	0	0	0.61	0	0	0	0.06	0.36	0
cis_mRNA_overlap	0	Lnc-AntiOverlap-mRNA	LTCONS_00290330	XM_011543813.2	chr8	8376158	8378619	2283	+	chr8	8339562	8386444	2538	-	-4360.43	0.95	0.6386	0.01	0	0.04	0.09	0.03	0.15	0	0	1.71	0	0	0	0	0.1	0.06	0	0	0	0.33	0
cis_mRNA_dw20k	11646	NA	LTCONS_00290503	XM_017013454.1	chr8	10440533	10444042	3510	+	chr8	10093712	10428888	3644	+	*	0.9396	0.8061	0.2	0.29	0.47	0.07	0.14	0.3	0.59	0.22	0.03	0.88	0.22	0.62	1.31	0.3	0.71	0.58	1.69	0.55	0.28	1.91
cis_mRNA_overlap	0	Lnc-AntiCompleteIn-mRNAExon	LTCONS_00290944	NM_201552.1	chr8	17864394	17891807	1281	+	chr8	17864391	17895538	1376	-	-2512.8	0.8962	0.7416	0.39	2.21	0.11	0.32	0.07	0.07	0.28	0	1.39	0.17	180.01	1192.11	25.98	87.95	124.19	171.86	243.76	1.44	302.3	255.35
cis_mRNA_overlap	0	Lnc-AntiOverlap-mRNA	LTCONS_00290944	NM_004467.3	chr8	17864394	17891807	1281	+	chr8	17864391	17895538	1249	-	-2331.5	0.9653	0.8693	0.39	2.21	0.11	0.32	0.07	0.07	0.28	0	1.39	0.17	932.29	4508.03	436.12	896.59	372.66	522.8	1307.31	7.28	2539.83	1444.5
cis_mRNA_overlap	0	Lnc-AntiOverlap-mRNA	LTCONS_00290944	XM_017013233.1	chr8	17864394	17891807	1281	+	chr8	17864380	17895670	1312	-	-2199.06	0.9354	0.7781	0.39	2.21	0.11	0.32	0.07	0.07	0.28	0	1.39	0.17	3.95	19.88	5.18	2.98	2.93	1.91	4.13	0	15.49	8.8
cis_mRNA_overlap	0	Lnc-AntiOverlap-mRNA	LTCONS_00291400	NM_003844.3	chr8	23224471	23231085	1846	+	chr8	23191457	23225167	1750	-	*	0.7802	0.6854	0	0.21	0	0	0.25	0	0	0	0	0	1.35	5.9	0.84	1.27	2.55	0.79	1.1	0.14	1.76	0.14
cis_mRNA_overlap	0	Lnc-AntiOverlap-mRNA	LTCONS_00291591	NM_000680.3	chr8	26865631	26876794	11164	+	chr8	26768812	26867243	3732	-	*	0.9698	0.9515	0.58	0.43	1.2	1.06	0.02	0.16	1.59	0.06	0.12	1.92	18.18	7.35	25.62	18.93	0.26	0.83	25.78	1.35	0.86	34.53
cis_mRNA_overlap	0	Lnc-AntiOverlap-mRNA	LTCONS_00291591	NM_001322502.1	chr8	26865631	26876794	11164	+	chr8	26753815	26865655	4534	-	*	0.8445	0.7547	0.58	0.43	1.2	1.06	0.02	0.16	1.59	0.06	0.12	1.92	0.35	0	0.34	1.31	0.16	0	1.44	0	0.29	1.22
cis_mRNA_overlap	0	Lnc-AntiOverlap-mRNA	LTCONS_00291591	NM_001322503.1	chr8	26865631	26876794	11164	+	chr8	26748150	26865655	2168	-	*	0.7689	0.6018	0.58	0.43	1.2	1.06	0.02	0.16	1.59	0.06	0.12	1.92	0.12	0.07	0.34	0.16	0.23	0	0.33	0	0.18	0.36
cis_mRNA_overlap	0	Lnc-AntiOverlap-mRNA	LTCONS_00291591	NM_001322504.1	chr8	26865631	26876794	11164	+	chr8	26779053	26865655	1947	-	*	0.9159	0.8328	0.58	0.43	1.2	1.06	0.02	0.16	1.59	0.06	0.12	1.92	0.09	0.07	0.37	0.36	0.03	0	0.55	0	0.02	0.35
cis_mRNA_overlap	0	Lnc-AntiOverlap-mRNA	LTCONS_00291591	NM_033302.3	chr8	26865631	26876794	11164	+	chr8	26753815	26865655	4920	-	*	0.8997	0.8081	0.58	0.43	1.2	1.06	0.02	0.16	1.59	0.06	0.12	1.92	3.14	0	8.27	0	0	0.17	10.25	0	0	13.71
cis_mRNA_overlap	0	Lnc-AntiOverlap-mRNA	LTCONS_00291591	NM_033304.3	chr8	26865631	26876794	11164	+	chr8	26765854	26865655	2251	-	*	0.8942	0.8997	0.58	0.43	1.2	1.06	0.02	0.16	1.59	0.06	0.12	1.92	0.86	0.56	1.84	1.33	0	0.03	1.58	0.18	0.02	1.33
cis_mRNA_overlap	0	Lnc-AntiOverlap-mRNA	LTCONS_00291591	XM_006716292.3	chr8	26865631	26876794	11164	+	chr8	26738113	26867270	12926	-	*	0.91	0.9726	0.58	0.43	1.2	1.06	0.02	0.16	1.59	0.06	0.12	1.92	0.51	0.07	0.61	0.16	0.01	0.03	0.81	0	0.03	1.36
cis_mRNA_overlap	0	Lnc-AntiOverlap-mRNA	LTCONS_00291591	XM_011544411.2	chr8	26865631	26876794	11164	+	chr8	26857873	26867270	3237	-	*	0.9467	0.9515	0.58	0.43	1.2	1.06	0.02	0.16	1.59	0.06	0.12	1.92	1.88	1.23	6.77	2.29	0.06	0.15	6.38	0.25	0.35	7.24
cis_mRNA_overlap	0	Lnc-AntiOverlap-mRNA	LTCONS_00291591	XM_011544412.2	chr8	26865631	26876794	11164	+	chr8	26837623	26867270	2683	-	*	0.9275	0.9394	0.58	0.43	1.2	1.06	0.02	0.16	1.59	0.06	0.12	1.92	0.73	0.75	3.7	1.07	0.02	0.16	3.39	0.12	0.1	3.6
cis_mRNA_overlap	0	Lnc-AntiOverlap-mRNA	LTCONS_00291591	XM_017013095.1	chr8	26865631	26876794	11164	+	chr8	26738113	26870994	16509	-	*	0.643	0.6575	0.58	0.43	1.2	1.06	0.02	0.16	1.59	0.06	0.12	1.92	0	0	0.02	0.03	0	0	0.02	0	0.01	0.01
cis_mRNA_overlap	0	Lnc-AntiOverlap-mRNA	LTCONS_00291591	XM_017013096.1	chr8	26865631	26876794	11164	+	chr8	26821318	26867270	6759	-	*	0.9497	0.9879	0.58	0.43	1.2	1.06	0.02	0.16	1.59	0.06	0.12	1.92	1.12	0.7	6.11	1.95	0.04	0.3	6.39	0.2	0.11	7.55
cis_mRNA_overlap	0	Lnc-CompleteIn-mRNAIntron	LTCONS_00291840	NM_001008710.2	chr8	30385201	30388413	3213	+	chr8	30384501	30572261	2919	+	*	0.9094	0.8061	1.89	1.56	2.36	1.25	2.17	0.86	7.49	1.92	1.09	5.3	0.78	0.94	1.49	0.91	0.51	0.42	3.52	1.67	0.39	1.85
cis_mRNA_overlap	0	Lnc-CompleteIn-mRNAIntron	LTCONS_00291840	NM_001008712.2	chr8	30385201	30388413	3213	+	chr8	30384501	30547524	1353	+	*	0.6187	0.6121	1.89	1.56	2.36	1.25	2.17	0.86	7.49	1.92	1.09	5.3	0.87	0.95	1.18	0.27	1.6	0.49	2.43	1.88	1.54	1.13
cis_mRNA_overlap	0	Lnc-CompleteIn-mRNAIntron	LTCONS_00291840	NM_006867.3	chr8	30385201	30388413	3213	+	chr8	30384501	30572261	3125	+	*	0.9044	0.9478	1.89	1.56	2.36	1.25	2.17	0.86	7.49	1.92	1.09	5.3	0.04	0.04	0.07	0	0.06	0	0.53	0.08	0	0.11
cis_mRNA_overlap	0	Lnc-CompleteIn-mRNAIntron	LTCONS_00291840	XM_017012984.1	chr8	30385201	30388413	3213	+	chr8	30384506	30545157	1648	+	*	0.8568	0.8545	1.89	1.56	2.36	1.25	2.17	0.86	7.49	1.92	1.09	5.3	0.71	0.53	1.54	0.6	1.23	0.52	3.47	1.39	1.03	1.24
cis_mRNA_overlap	0	Lnc-CompleteIn-mRNAIntron	LTCONS_00291840	XM_017012989.1	chr8	30385201	30388413	3213	+	chr8	30384506	30556651	1883	+	*	0.8813	0.9152	1.89	1.56	2.36	1.25	2.17	0.86	7.49	1.92	1.09	5.3	0.25	0.18	0.63	0.24	0.5	0.15	1.21	0.59	0.11	0.58
cis_mRNA_overlap	0	Lnc-CompleteIn-mRNAIntron	LTCONS_00291841	NM_001008710.2	chr8	30388548	30453301	64662	+	chr8	30384501	30572261	2919	+	*	0.896	0.7091	0.6	0.49	1.91	0.43	1.56	0.65	5.19	1.39	0.3	3.9	0.78	0.94	1.49	0.91	0.51	0.42	3.52	1.67	0.39	1.85
cis_mRNA_overlap	0	Lnc-CompleteIn-mRNAIntron	LTCONS_00291841	NM_006867.3	chr8	30388548	30453301	64662	+	chr8	30384501	30572261	3125	+	*	0.8675	0.8863	0.6	0.49	1.91	0.43	1.56	0.65	5.19	1.39	0.3	3.9	0.04	0.04	0.07	0	0.06	0	0.53	0.08	0	0.11
cis_mRNA_overlap	0	Lnc-CompleteIn-mRNAIntron	LTCONS_00291841	XM_017012984.1	chr8	30388548	30453301	64662	+	chr8	30384506	30545157	1648	+	*	0.8573	0.7333	0.6	0.49	1.91	0.43	1.56	0.65	5.19	1.39	0.3	3.9	0.71	0.53	1.54	0.6	1.23	0.52	3.47	1.39	1.03	1.24
cis_mRNA_overlap	0	Lnc-CompleteIn-mRNAIntron	LTCONS_00291841	XM_017012989.1	chr8	30388548	30453301	64662	+	chr8	30384506	30556651	1883	+	*	0.9095	0.8545	0.6	0.49	1.91	0.43	1.56	0.65	5.19	1.39	0.3	3.9	0.25	0.18	0.63	0.24	0.5	0.15	1.21	0.59	0.11	0.58
cis_mRNA_overlap	0	Lnc-CompleteIn-mRNAIntron	LTCONS_00291843	NM_001008712.2	chr8	30402252	30453301	50170	+	chr8	30384501	30547524	1353	+	*	0.673	0.7139	0	0	0.12	0	0.04	0.01	0.22	0.03	0.01	0.07	0.87	0.95	1.18	0.27	1.6	0.49	2.43	1.88	1.54	1.13
cis_mRNA_overlap	0	Lnc-CompleteIn-mRNAIntron	LTCONS_00291843	NM_006867.3	chr8	30402252	30453301	50170	+	chr8	30384501	30572261	3125	+	*	0.9012	0.7812	0	0	0.12	0	0.04	0.01	0.22	0.03	0.01	0.07	0.04	0.04	0.07	0	0.06	0	0.53	0.08	0	0.11
cis_mRNA_overlap	0	Lnc-CompleteIn-mRNAIntron	LTCONS_00291843	XM_017012984.1	chr8	30402252	30453301	50170	+	chr8	30384506	30545157	1648	+	*	0.9482	0.8555	0	0	0.12	0	0.04	0.01	0.22	0.03	0.01	0.07	0.71	0.53	1.54	0.6	1.23	0.52	3.47	1.39	1.03	1.24
cis_mRNA_overlap	0	Lnc-CompleteIn-mRNAIntron	LTCONS_00291843	XM_017012989.1	chr8	30402252	30453301	50170	+	chr8	30384506	30556651	1883	+	*	0.9367	0.7632	0	0	0.12	0	0.04	0.01	0.22	0.03	0.01	0.07	0.25	0.18	0.63	0.24	0.5	0.15	1.21	0.59	0.11	0.58
cis_mRNA_up10k	298	NA	LTCONS_00292000	NM_001265581.1	chr8	33513482	33514206	725	+	chr8	33498509	33513185	2516	-	*	0.7977	0.7006	1.96	1.02	1.11	1.31	0.05	0.72	2.15	0.5	0.22	0.47	0.03	0	0	0	0	0	0.06	0	0	0
cis_mRNA_up10k	336	NA	LTCONS_00293294	NM_025054.4	chr8	66667552	66685553	1837	+	chr8	66630253	66667217	8176	-	*	0.8887	0.6712	0.02	0.08	0	0.06	0.17	0	0	0.08	0.03	0	7.04	10.24	5.73	6.12	18.18	6.73	6.76	8.91	7.03	8
cis_mRNA_overlap	0	Lnc-Overlap-mRNA	LTCONS_00293295	NM_019607.2	chr8	66667552	66691220	12989	+	chr8	66667552	66681149	1892	+	*	0.8214	0.8875	0.62	1.58	0.97	0.62	3.57	2.71	0.81	2.04	1.09	1.79	0.26	0.67	0.46	0.3	0.83	1.26	0.22	0.53	0.42	0.6
cis_mRNA_overlap	0	Lnc-AntiOverlap-mRNA	LTCONS_00293430	XM_017013886.1	chr8	69834105	69856559	9106	+	chr8	69747450	69835064	2446	-	*	-0.7432	-0.7586	0	0	0.25	0.04	0	0.43	0.01	0	0.39	0	0.03	0.02	0	0.03	0.03	0	0	0.04	0	0.03
cis_mRNA_overlap	0	Lnc-Overlap-mRNA	LTCONS_00294148	NM_001282356.1	chr8	91197424	91219738	1130	+	chr8	91209494	91398155	5307	+	*	0.9054	0.6011	0	0.72	0.05	0.04	0	0	0	0.27	0.08	0.07	0.06	0.18	0	0	0	0	0	0.09	0	0.06
cis_mRNA_dw20k	4012	NA	LTCONS_00294231	NM_001161781.1	chr8	93930079	93933656	3578	+	chr8	93917051	93926068	4221	+	*	0.6802	0.8846	0.02	0.01	0.13	0.01	0.22	0.82	0.13	0.09	0.06	0.08	0	0	0.1	0	0.41	0.32	0.08	0.18	0	0
cis_mRNA_overlap	0	Lnc-CompleteIn-mRNAIntron	LTCONS_00294298	XM_017013030.1	chr8	94909464	94933847	24384	+	chr8	94895347	95058717	2470	+	*	0.9885	0.8203	0.02	0.04	0.04	0.02	0.47	0.87	0.06	0.22	0.06	0.09	0	0	0	0	0.13	0.21	0	0.07	0	0
cis_mRNA_overlap	0	Lnc-AntiOverlap-mRNA	LTCONS_00294643	NM_001282873.1	chr8	102239394	102256126	12430	+	chr8	102252273	102412689	10881	-	*	0.7524	0.719	0	0.04	0	0	0.04	0.07	0	0	0	0.01	0	0.44	0	0	0	0.31	0	0	0	0
cis_mRNA_overlap	0	Lnc-AntiOverlap-mRNA	LTCONS_00294643	NM_015902.5	chr8	102239394	102256126	12430	+	chr8	102252273	102412689	10884	-	*	0.6003	0.719	0	0.04	0	0	0.04	0.07	0	0	0	0.01	0	1.6	0	0	0	0.59	0	0	0	0
cis_mRNA_dw20k	3785	NA	LTCONS_00295137	NM_006438.4	chr8	119112239	119117640	5402	+	chr8	119067185	119108455	3195	+	*	0.9917	0.9515	2.67	0.16	4.49	2.54	0.13	0.05	2.99	0.04	0.03	3.81	23.2	1.18	34.69	24.92	0.65	0.19	26.48	0.56	0.28	28.91
cis_mRNA_overlap	0	Lnc-Overlap-mRNA	LTCONS_00296249	NM_173832.5	chr8	143246821	143254819	7809	+	chr8	143246928	143262705	4797	+	-3707.68	0.9493	0.8545	0.16	0.42	0.18	0.1	1.04	0.57	0.29	0.79	0.33	0.24	0.25	0.41	0.35	0.16	1.35	0.57	0.2	0.73	0.32	0.23
cis_mRNA_overlap	0	mRNA-CompleteIn-LncExon	LTCONS_00296249	NM_001271156.2	chr8	143246821	143254819	7809	+	chr8	143246821	143253591	3284	+	-2653.05	0.9168	0.9636	0.16	0.42	0.18	0.1	1.04	0.57	0.29	0.79	0.33	0.24	0.09	0.63	0.24	0.13	1.68	0.5	0.32	0.68	0.38	0.37
cis_mRNA_overlap	0	Lnc-CompleteIn-mRNAIntron	LTCONS_00296837	XM_017013731.1	chr8	4750246	4795256	45011	-	chr8	2956689	4995035	11306	-	*	0.8749	0.862	0	0.79	0	0	0	0.74	0	0	0	0	0	0.43	0	0	0.01	0.13	0	0	0	0
cis_mRNA_overlap	0	Lnc-AntiOverlap-mRNA	LTCONS_00296892	XM_017013830.1	chr8	6396932	6407433	9358	-	chr8	6406593	6639467	4094	+	*	0.9114	0.7071	0.01	0	0	0	0	0	0.03	0	0	0	0.17	0.12	0.14	0.12	0.15	0.07	0.36	0.15	0.05	0.14
cis_mRNA_overlap	0	Lnc-CompleteIn-mRNAIntron	LTCONS_00299175	NM_014729.2	chr8	59081753	59118782	37030	-	chr8	58805418	59119208	4131	-	*	0.788	0.8936	0.4	0.06	0.2	0.32	2.61	1.21	0.27	0.06	1.28	0.65	0.43	0.07	0.05	0.18	0.7	0.89	0.11	0	0.42	0.21
cis_mRNA_overlap	0	Lnc-CompleteIn-mRNAIntron	LTCONS_00299175	XM_017014085.1	chr8	59081753	59118782	37030	-	chr8	58805685	59119293	3883	-	*	0.8845	0.6585	0.4	0.06	0.2	0.32	2.61	1.21	0.27	0.06	1.28	0.65	0.13	0	0.07	0	0.4	0.26	0.16	0.03	0.25	0
cis_mRNA_dw20k	12338	NA	LTCONS_00299547	NM_006421.4	chr8	67184994	67185312	319	-	chr8	67197649	67343677	7225	-	*	0.7478	0.6253	0.12	0	0	0	0.78	0.46	0.14	0.32	0.61	0	3.66	6.55	3.65	2.05	14.2	8.51	5.29	8.16	4.73	4.86
cis_mRNA_up10k	7354	NA	LTCONS_00300070	XM_011517577.2	chr8	81598017	81601926	3910	-	chr8	81524673	81590664	1592	-	*	0.8158	0.6984	0.02	0.22	0.06	0.11	0.06	0.14	0.04	0.24	0.47	0.09	0	0	0	0	0	0	0	0.02	0.02	0
cis_mRNA_up10k	57	NA	LTCONS_00300747	NM_152564.4	chr8	98995932	99013210	11115	-	chr8	99013266	99877586	14025	+	*	0.7192	0.7697	0.02	0.17	0.19	0.04	0.2	0.15	0	0.22	0.1	0.07	1.72	3.1	2.89	1.57	6.75	4.01	2.77	5.46	1.5	2.8
cis_mRNA_up10k	65	NA	LTCONS_00300747	XM_011516853.2	chr8	98995932	99013210	11115	-	chr8	99013274	99810977	9069	+	*	0.6233	0.7212	0.02	0.17	0.19	0.04	0.2	0.15	0	0.22	0.1	0.07	0.33	0.41	0.48	0	1.58	1.53	0.42	0.97	0.44	0.35
cis_mRNA_up10k	65	NA	LTCONS_00300747	XM_011516861.1	chr8	98995932	99013210	11115	-	chr8	99013274	99400136	3235	+	*	0.7018	0.6848	0.02	0.17	0.19	0.04	0.2	0.15	0	0.22	0.1	0.07	1.89	4.12	1.44	1.83	6.8	2.15	0.62	4.92	2.52	2.25
cis_mRNA_up10k	65	NA	LTCONS_00300747	XM_011516866.2	chr8	98995932	99013210	11115	-	chr8	99013274	99194812	3544	+	*	0.6933	0.7455	0.02	0.17	0.19	0.04	0.2	0.15	0	0.22	0.1	0.07	0.16	0.53	0.48	0.07	1.36	0.99	0.47	1.09	0.3	0.75
cis_mRNA_dw20k	7727	NA	LTCONS_00301409	NM_000127.2	chr8	117790952	117791637	686	-	chr8	117799363	118111819	3363	-	*	0.8232	0.7697	0.28	0.55	0.14	0.3	17.34	0.36	2.01	0.43	0.63	0.9	18.64	25.62	18.96	7.36	43.91	8.51	27.47	16.74	19.21	20.66
cis_mRNA_overlap	0	Lnc-CompleteIn-mRNAIntron	LTCONS_00301421	XM_017013410.1	chr8	118284937	118287108	2172	-	chr8	118239985	118621985	1918	-	*	0.9795	0.8632	0.2	0.12	0.46	0.16	0.06	0.21	1.21	0.09	0.13	1.01	0.24	0.12	0.34	0.08	0.02	0.09	0.84	0.02	0.16	0.62
cis_mRNA_overlap	0	Lnc-CompleteIn-mRNAIntron	LTCONS_00301422	NM_001101676.1	chr8	118287246	118291744	4499	-	chr8	118189455	118621945	8870	-	*	0.6675	0.8909	0.38	0.07	0.54	0.12	0.05	0.26	1.3	0.01	0.1	1.25	1.54	0.22	0.35	0.32	0	0.27	0.95	0.01	0.26	1.13
cis_mRNA_overlap	0	Lnc-CompleteIn-mRNAIntron	LTCONS_00301422	XM_017013410.1	chr8	118287246	118291744	4499	-	chr8	118239985	118621985	1918	-	*	0.9733	0.8997	0.38	0.07	0.54	0.12	0.05	0.26	1.3	0.01	0.1	1.25	0.24	0.12	0.34	0.08	0.02	0.09	0.84	0.02	0.16	0.62
cis_mRNA_dw20k	5948	NA	LTCONS_00301423	XM_011517031.2	chr8	118292616	118318281	25666	-	chr8	118324228	118621985	4371	-	*	0.8787	0.7477	0.46	0.04	0.69	0.15	0.06	0.24	1.81	0.05	0.12	1.88	0.48	0.02	0.13	0.16	0.02	0	0.57	0.06	0.08	0.64
cis_mRNA_overlap	0	Lnc-CompleteIn-mRNAIntron	LTCONS_00301423	NM_001101676.1	chr8	118292616	118318281	25666	-	chr8	118189455	118621945	8870	-	*	0.6527	0.8667	0.46	0.04	0.69	0.15	0.06	0.24	1.81	0.05	0.12	1.88	1.54	0.22	0.35	0.32	0	0.27	0.95	0.01	0.26	1.13
cis_mRNA_overlap	0	Lnc-CompleteIn-mRNAIntron	LTCONS_00301423	XM_017013410.1	chr8	118292616	118318281	25666	-	chr8	118239985	118621985	1918	-	*	0.9645	0.8024	0.46	0.04	0.69	0.15	0.06	0.24	1.81	0.05	0.12	1.88	0.24	0.12	0.34	0.08	0.02	0.09	0.84	0.02	0.16	0.62
cis_mRNA_overlap	0	Lnc-Overlap-mRNA	LTCONS_00301424	NM_001101676.1	chr8	118318382	118383369	61478	-	chr8	118189455	118621945	8870	-	*	0.6589	0.8632	0.51	0.05	0.78	0.16	0.06	0.31	1.78	0.06	0.12	1.62	1.54	0.22	0.35	0.32	0	0.27	0.95	0.01	0.26	1.13
cis_mRNA_overlap	0	Lnc-Overlap-mRNA	LTCONS_00301424	XM_011517031.2	chr8	118318382	118383369	61478	-	chr8	118324228	118621985	4371	-	*	0.867	0.747	0.51	0.05	0.78	0.16	0.06	0.31	1.78	0.06	0.12	1.62	0.48	0.02	0.13	0.16	0.02	0	0.57	0.06	0.08	0.64
cis_mRNA_overlap	0	Lnc-Overlap-mRNA	LTCONS_00301424	XM_017013410.1	chr8	118318382	118383369	61478	-	chr8	118239985	118621985	1918	-	*	0.9772	0.8171	0.51	0.05	0.78	0.16	0.06	0.31	1.78	0.06	0.12	1.62	0.24	0.12	0.34	0.08	0.02	0.09	0.84	0.02	0.16	0.62
cis_mRNA_overlap	0	Lnc-CompleteIn-mRNAIntron	LTCONS_00302827	XM_011516960.1	chr8	144060925	144063490	2566	-	chr8	144051266	144064026	4307	-	*	0.879	0.7531	0.05	0	0.78	0.34	0.08	0.4	0.15	0.24	0.02	0.32	0	0	0.22	0	0	0.15	0	0	0	0.06
cis_mRNA_up10k	310	NA	LTCONS_00303031	NM_023080.2	chr8	145046590	145052129	5540	-	chr8	145052438	145056030	2617	+	*	0.9283	0.8124	0.06	0.06	0.03	0.03	0.77	0.3	0.02	0.56	0.07	0.03	4.19	8.04	4.09	2.83	23.2	6.35	4.45	16.48	9.9	3.49
cis_mRNA_overlap	0	Lnc-CompleteIn-mRNAIntron	LTCONS_00304647	MTCONS_00304642	chr9	22559055	22620116	60865	+	chr9	22446841	22642900	3802	+	*	0.8816	0.7234	0.3	0.2	1.25	0.46	0.41	0.4	1.12	0.39	0.26	1.54	0.1	0.06	0.62	0.45	0.02	0.06	0.37	0.07	0.05	0.64
cis_mRNA_dw20k	771	NA	LTCONS_00306393	XM_017014353.1	chr9	76624236	76624716	481	+	chr9	76625486	76906220	11768	-	*	0.6242	0.833	0.06	0	0.08	0.92	0	0	0.23	0	0	0	0.05	0.01	0.05	0.1	0.04	0.01	0.14	0	0.01	0.05
cis_mRNA_overlap	0	Lnc-CompleteIn-mRNAIntron	LTCONS_00307234	NM_001012267.2	chr9	92387003	92387810	808	+	chr9	92325468	92615164	3413	+	*	0.889	0.6768	0.06	0.13	0.51	0.12	0.17	1.73	0.12	1.84	0.13	0.61	0.18	0.24	0.1	0.19	0.39	1.45	0.28	0.92	0.3	0.38
cis_mRNA_overlap	0	Lnc-CompleteIn-mRNAIntron	LTCONS_00307234	XM_011518689.1	chr9	92387003	92387810	808	+	chr9	92325457	92494169	1409	+	*	0.8791	0.6154	0.06	0.13	0.51	0.12	0.17	1.73	0.12	1.84	0.13	0.61	0	0	0.21	0.07	0	0.58	0.06	0.29	0	0.06
cis_mRNA_overlap	0	Lnc-CompleteIn-mRNAIntron	LTCONS_00307235	NM_001012267.2	chr9	92389117	92390503	1387	+	chr9	92325468	92615164	3413	+	*	0.9423	0.8061	0.07	0.05	0.29	0.08	0.37	1.56	0.32	1.29	0.14	0.69	0.18	0.24	0.1	0.19	0.39	1.45	0.28	0.92	0.3	0.38
cis_mRNA_overlap	0	Lnc-CompleteIn-mRNAIntron	LTCONS_00307235	XM_011518689.1	chr9	92389117	92390503	1387	+	chr9	92325457	92494169	1409	+	*	0.8763	0.6462	0.07	0.05	0.29	0.08	0.37	1.56	0.32	1.29	0.14	0.69	0	0	0.21	0.07	0	0.58	0.06	0.29	0	0.06
cis_mRNA_overlap	0	Lnc-CompleteIn-mRNAIntron	LTCONS_00307237	NM_001012267.2	chr9	92405341	92415749	10409	+	chr9	92325468	92615164	3413	+	*	0.921	0.7915	0.07	0.07	0.43	0.07	0.45	1.66	0.47	1.44	0.09	0.7	0.18	0.24	0.1	0.19	0.39	1.45	0.28	0.92	0.3	0.38
cis_mRNA_overlap	0	Lnc-CompleteIn-mRNAIntron	LTCONS_00307237	XM_011518689.1	chr9	92405341	92415749	10409	+	chr9	92325457	92494169	1409	+	*	0.8805	0.6351	0.07	0.07	0.43	0.07	0.45	1.66	0.47	1.44	0.09	0.7	0	0	0.21	0.07	0	0.58	0.06	0.29	0	0.06
cis_mRNA_overlap	0	Lnc-CompleteIn-mRNAIntron	LTCONS_00307238	NM_001012267.2	chr9	92415852	92430791	14940	+	chr9	92325468	92615164	3413	+	*	0.9374	0.6727	0.09	0.03	0.34	0.1	0.47	1.46	0.33	1.24	0.08	0.52	0.18	0.24	0.1	0.19	0.39	1.45	0.28	0.92	0.3	0.38
cis_mRNA_overlap	0	Lnc-CompleteIn-mRNAIntron	LTCONS_00307238	XM_011518689.1	chr9	92415852	92430791	14940	+	chr9	92325457	92494169	1409	+	*	0.8853	0.734	0.09	0.03	0.34	0.1	0.47	1.46	0.33	1.24	0.08	0.52	0	0	0.21	0.07	0	0.58	0.06	0.29	0	0.06
cis_mRNA_overlap	0	Lnc-CompleteIn-mRNAIntron	LTCONS_00307240	NM_001012267.2	chr9	92461850	92472412	10563	+	chr9	92325468	92615164	3413	+	*	0.9161	0.7903	0.1	0.09	0.46	0.13	0.47	1.7	0.47	1.62	0.14	0.71	0.18	0.24	0.1	0.19	0.39	1.45	0.28	0.92	0.3	0.38
cis_mRNA_overlap	0	Lnc-CompleteIn-mRNAIntron	LTCONS_00307240	XM_011518689.1	chr9	92461850	92472412	10563	+	chr9	92325457	92494169	1409	+	*	0.8724	0.667	0.1	0.09	0.46	0.13	0.47	1.7	0.47	1.62	0.14	0.71	0	0	0.21	0.07	0	0.58	0.06	0.29	0	0.06
cis_mRNA_overlap	0	Lnc-Overlap-mRNA	LTCONS_00307506	XM_017015232.1	chr9	94992260	95017821	24370	+	chr9	94726604	95022285	5234	+	*	0.986	0.9636	2.01	1.06	7.35	1.68	2.45	2.84	12.84	3.71	1.76	10.88	1.09	0.83	3.46	1.19	1.67	1.75	6.03	2.61	1	4.52
cis_mRNA_dw20k	11837	NA	LTCONS_00307507	NM_001243743.1	chr9	94992260	95087218	18807	+	chr9	95099054	95317254	4534	-	*	0.7254	0.7328	2.62	2.46	6.2	3.48	0	1.36	6.62	0	1.97	8.47	0	0.07	0.24	0	0	0	0.22	0	0.09	1.9
cis_mRNA_dw20k	13270	NA	LTCONS_00307507	XM_005251802.3	chr9	94992260	95087218	18807	+	chr9	95100487	95144573	3261	-	*	0.8207	0.9024	2.62	2.46	6.2	3.48	0	1.36	6.62	0	1.97	8.47	4.23	3.17	3.93	5.81	0.07	0.2	4.04	0.07	0.33	6.97
cis_mRNA_dw20k	13270	NA	LTCONS_00307507	XM_006717001.2	chr9	94992260	95087218	18807	+	chr9	95100487	95317691	2976	-	*	-0.6991	-0.8809	2.62	2.46	6.2	3.48	0	1.36	6.62	0	1.97	8.47	0.03	0.14	0	0	0.12	0.11	0	0.4	0.11	0
cis_mRNA_overlap	0	Lnc-Overlap-mRNA	LTCONS_00307991	NM_031919.4	chr9	105447801	105537046	26971	+	chr9	105448034	105472140	667	+	*	0.8516	0.7693	0.15	0.16	0.31	0.11	1.17	1.37	0.52	1.77	0.26	0.56	0	0	0.06	0	0.27	0.15	0.16	0.24	0	0
cis_mRNA_overlap	0	Lnc-Overlap-mRNA	LTCONS_00307991	XM_011519081.2	chr9	105447801	105537046	26971	+	chr9	105499410	105552431	8309	+	*	0.8977	0.9142	0.15	0.16	0.31	0.11	1.17	1.37	0.52	1.77	0.26	0.56	0	0.02	0.05	0	0.26	0.38	0.17	0.25	0	0.07
cis_mRNA_up10k	3	NA	LTCONS_00308249	NM_002829.3	chr9	109498315	109514605	1228	+	chr9	109375694	109498313	6716	-	*	0.8565	0.6775	0	0.01	0	0.01	0.25	0.06	0	0.09	0.04	0	0.01	0.24	0.05	0.55	1.35	0.37	0	0.22	0.62	0.25
cis_mRNA_overlap	0	Lnc-Overlap-mRNA	LTCONS_00308355	NM_032303.4	chr9	112379292	112472410	3797	+	chr9	112379909	112472405	3373	+	-1394.3	0.7627	0.7333	0.54	0.17	0.44	0.31	0.11	0.2	0.89	0.32	0.07	0.45	37.47	25.48	31.8	47.54	9.94	18.29	46.03	32.16	18.97	38.56
cis_mRNA_overlap	0	Lnc-CompleteIn-mRNAIntron	LTCONS_00308490	NM_001318042.1	chr9	113901187	113933812	32626	+	chr9	113876282	114056595	9392	+	*	-0.6282	-0.6399	0.22	0.09	0.91	0.12	0.49	0.43	1.12	0.32	0.08	0.61	0	0.11	0	0.17	0.05	0	0	0.09	0.13	0.11
cis_mRNA_overlap	0	Lnc-AntiCompleteIn-mRNAIntron	LTCONS_00308632	NM_198186.3	chr9	116567157	116571416	3535	+	chr9	116425225	116687215	2359	-	*	0.7272	0.681	0.07	0.39	0.14	0.11	0.15	0.27	0.17	0.1	0.47	0.08	0.14	0.44	0	0.16	0	0.58	0.26	0.21	0.4	0
cis_mRNA_dw20k	784	NA	LTCONS_00308740	MTCONS_00315489	chr9	120842996	120854868	5946	+	chr9	120855651	120895363	4539	-	*	-0.6049	-0.6513	0	0.38	0.16	0.32	0	0.55	0.09	0.05	1.62	0.49	0.06	0	0.11	0.07	0.05	0	0.05	0.09	0	0
cis_mRNA_overlap	0	Lnc-Overlap-mRNA	LTCONS_00309561	MTCONS_00309550	chr9	128528366	128553489	1535	+	chr9	128504692	128553489	4856	+	-1061.45	0.6437	0.7237	0	0	0	0	0.25	0.08	0	0.1	0	0	0	0	0	0	0.07	0.11	0	0	0	0
cis_mRNA_overlap	0	Lnc-Overlap-mRNA	LTCONS_00309561	NM_001195532.1	chr9	128528366	128553489	1535	+	chr9	128552558	128633665	7832	+	*	0.7909	0.7382	0	0	0	0	0.25	0.08	0	0.1	0	0	5.23	5.31	6.14	3.9	13.57	6.05	3.24	16.02	2.21	2.51
cis_mRNA_overlap	0	Lnc-Overlap-mRNA	LTCONS_00309561	NM_003127.3	chr9	128528366	128553489	1535	+	chr9	128552558	128633665	7892	+	*	0.8817	0.7531	0	0	0	0	0.25	0.08	0	0.1	0	0	11.3	13.55	16.53	7.58	37.69	17.97	9.01	25.84	22.41	10.79
cis_mRNA_up10k	7617	NA	LTCONS_00310476	XM_011518560.2	chr9	136942621	136943868	1248	+	chr9	136951484	136955505	2449	+	*	0.6253	0.6147	0.27	0.08	0.76	0.11	0.08	0.2	0.32	0.29	0.13	0.38	0.13	0.09	0.3	0.05	0.13	0.27	0.25	0.3	0.11	0.12
tran	NA	NA	LTCONS_00310729	XM_017014136.1	chr9	138279213	138286556	622	+	chr8	179320	208057	2229	-	-414.56	0.9073	0.6228	0.24	1.19	0.09	1.21	0.76	8.14	0.42	0.35	0.68	1.24	0	0	0	0.01	0	0.02	0	0	0	0
cis_mRNA_overlap	0	Lnc-CompleteIn-mRNAIntron	LTCONS_00310991	XM_011517765.2	chr9	3899524	3921774	22251	-	chr9	3855439	4300081	3425	-	*	0.7465	0.7664	0.17	0.02	0.33	0.08	0.2	0.14	0.79	0.08	0.06	0.44	0	0	0.03	0	0	0	0.02	0	0	0.02
cis_mRNA_overlap	0	Lnc-CompleteIn-mRNAIntron	LTCONS_00310991	XM_011517766.2	chr9	3899524	3921774	22251	-	chr9	3824127	4153302	7739	-	*	0.9953	0.9634	0.17	0.02	0.33	0.08	0.2	0.14	0.79	0.08	0.06	0.44	0.12	0.01	0.26	0.05	0.15	0.09	0.52	0.05	0.06	0.29
cis_mRNA_overlap	0	Lnc-CompleteIn-mRNAIntron	LTCONS_00310991	XM_017014361.1	chr9	3899524	3921774	22251	-	chr9	3824127	4145726	7438	-	*	0.8771	0.9539	0.17	0.02	0.33	0.08	0.2	0.14	0.79	0.08	0.06	0.44	0.13	0	0.32	0.11	0.13	0.13	0.38	0.04	0.06	0.16
cis_mRNA_overlap	0	Lnc-CompleteIn-mRNAIntron	LTCONS_00310993	MTCONS_00310992	chr9	3978963	3987038	8076	-	chr9	3931936	4310694	2799	-	*	0.7864	0.6093	0.31	0.08	0.6	0.2	0.54	0.28	1.46	0.17	0.09	0.84	0	0.04	0.17	0.18	0.16	0.04	0.27	0	0	0.13
cis_mRNA_overlap	0	Lnc-CompleteIn-mRNAIntron	LTCONS_00310993	XM_011517765.2	chr9	3978963	3987038	8076	-	chr9	3855439	4300081	3425	-	*	0.7146	0.7641	0.31	0.08	0.6	0.2	0.54	0.28	1.46	0.17	0.09	0.84	0	0	0.03	0	0	0	0.02	0	0	0.02
cis_mRNA_overlap	0	Lnc-CompleteIn-mRNAIntron	LTCONS_00310993	XM_011517766.2	chr9	3978963	3987038	8076	-	chr9	3824127	4153302	7739	-	*	0.9867	0.9605	0.31	0.08	0.6	0.2	0.54	0.28	1.46	0.17	0.09	0.84	0.12	0.01	0.26	0.05	0.15	0.09	0.52	0.05	0.06	0.29
cis_mRNA_overlap	0	Lnc-CompleteIn-mRNAIntron	LTCONS_00310993	XM_017014361.1	chr9	3978963	3987038	8076	-	chr9	3824127	4145726	7438	-	*	0.8601	0.9633	0.31	0.08	0.6	0.2	0.54	0.28	1.46	0.17	0.09	0.84	0.13	0	0.32	0.11	0.13	0.13	0.38	0.04	0.06	0.16
cis_mRNA_overlap	0	Lnc-CompleteIn-mRNAIntron	LTCONS_00310994	XM_011517765.2	chr9	3987150	3987655	506	-	chr9	3855439	4300081	3425	-	*	0.756	0.7641	0.12	0	0.64	0.11	0.33	0.23	1.45	0.08	0.06	1.87	0	0	0.03	0	0	0	0.02	0	0	0.02
cis_mRNA_overlap	0	Lnc-CompleteIn-mRNAIntron	LTCONS_00310994	XM_011517766.2	chr9	3987150	3987655	506	-	chr9	3824127	4153302	7739	-	*	0.8495	0.9362	0.12	0	0.64	0.11	0.33	0.23	1.45	0.08	0.06	1.87	0.12	0.01	0.26	0.05	0.15	0.09	0.52	0.05	0.06	0.29
cis_mRNA_overlap	0	Lnc-CompleteIn-mRNAIntron	LTCONS_00310994	XM_017014361.1	chr9	3987150	3987655	506	-	chr9	3824127	4145726	7438	-	*	0.6434	0.9387	0.12	0	0.64	0.11	0.33	0.23	1.45	0.08	0.06	1.87	0.13	0	0.32	0.11	0.13	0.13	0.38	0.04	0.06	0.16
tran	NA	NA	LTCONS_00310994	MTCONS_00323147	chr9	3987150	3987655	506	-	chrX	36959509	36963655	4147	-	-283.49	0.6776	0.6606	0.12	0	0.64	0.11	0.33	0.23	1.45	0.08	0.06	1.87	0.89	0.92	1.38	0.85	0.62	2.16	1.46	0.27	0.61	2.31
cis_mRNA_overlap	0	Lnc-CompleteIn-mRNAIntron	LTCONS_00310995	MTCONS_00310992	chr9	3987875	4007827	19953	-	chr9	3931936	4310694	2799	-	*	0.7778	0.6401	0.25	0.06	0.65	0.16	0.45	0.3	1.56	0.12	0.11	0.84	0	0.04	0.17	0.18	0.16	0.04	0.27	0	0	0.13
cis_mRNA_overlap	0	Lnc-CompleteIn-mRNAIntron	LTCONS_00310995	XM_011517765.2	chr9	3987875	4007827	19953	-	chr9	3855439	4300081	3425	-	*	0.7416	0.7641	0.25	0.06	0.65	0.16	0.45	0.3	1.56	0.12	0.11	0.84	0	0	0.03	0	0	0	0.02	0	0	0.02
cis_mRNA_overlap	0	Lnc-CompleteIn-mRNAIntron	LTCONS_00310995	XM_011517766.2	chr9	3987875	4007827	19953	-	chr9	3824127	4153302	7739	-	*	0.9927	0.9483	0.25	0.06	0.65	0.16	0.45	0.3	1.56	0.12	0.11	0.84	0.12	0.01	0.26	0.05	0.15	0.09	0.52	0.05	0.06	0.29
cis_mRNA_overlap	0	Lnc-CompleteIn-mRNAIntron	LTCONS_00310995	XM_017014361.1	chr9	3987875	4007827	19953	-	chr9	3824127	4145726	7438	-	*	0.8783	0.9633	0.25	0.06	0.65	0.16	0.45	0.3	1.56	0.12	0.11	0.84	0.13	0	0.32	0.11	0.13	0.13	0.38	0.04	0.06	0.16
cis_mRNA_overlap	0	Lnc-CompleteIn-mRNAIntron	LTCONS_00311005	MTCONS_00310997	chr9	4258129	4276336	18168	-	chr9	4068361	4431827	52046	-	*	0.9285	0.9273	0.77	0.1	1.94	0.35	0.91	0.37	2.31	0.39	0.24	2.07	0.62	0.14	1.63	0.44	0.96	0.64	3.05	0.32	0.3	1.58
cis_mRNA_overlap	0	Lnc-CompleteIn-mRNAIntron	LTCONS_00311005	XM_005251389.4	chr9	4258129	4276336	18168	-	chr9	4053194	4300084	3792	-	*	0.9126	0.8875	0.77	0.1	1.94	0.35	0.91	0.37	2.31	0.39	0.24	2.07	0.16	0.03	0.48	0.25	0.38	0.12	0.63	0.06	0.06	0.39
cis_mRNA_overlap	0	Lnc-CompleteIn-mRNAIntron	LTCONS_00311005	XM_011517765.2	chr9	4258129	4276336	18168	-	chr9	3855439	4300081	3425	-	*	0.9084	0.7641	0.77	0.1	1.94	0.35	0.91	0.37	2.31	0.39	0.24	2.07	0	0	0.03	0	0	0	0.02	0	0	0.02
cis_mRNA_overlap	0	Lnc-CompleteIn-mRNAIntron	LTCONS_00311008	MTCONS_00310997	chr9	4311714	4321193	9480	-	chr9	4068361	4431827	52046	-	*	0.8457	0.8061	0.11	0.09	0.53	0.13	0.47	0.14	0.72	0.04	0.15	0.86	0.62	0.14	1.63	0.44	0.96	0.64	3.05	0.32	0.3	1.58
cis_mRNA_overlap	0	Lnc-CompleteIn-mRNAIntron	LTCONS_00311010	MTCONS_00310997	chr9	4373931	4385657	11727	-	chr9	4068361	4431827	52046	-	*	0.7402	0.8788	0.2	0.17	0.93	0.35	0.72	0.37	1.33	0.12	0.3	2.18	0.62	0.14	1.63	0.44	0.96	0.64	3.05	0.32	0.3	1.58
cis_mRNA_overlap	0	Lnc-CompleteIn-mRNAIntron	LTCONS_00311011	MTCONS_00310997	chr9	4385839	4397615	11777	-	chr9	4068361	4431827	52046	-	*	0.7672	0.8788	0.11	0.09	0.72	0.26	0.66	0.36	1.29	0.13	0.18	1.94	0.62	0.14	1.63	0.44	0.96	0.64	3.05	0.32	0.3	1.58
cis_mRNA_overlap	0	Lnc-CompleteIn-mRNAIntron	LTCONS_00311012	MTCONS_00310997	chr9	4408889	4419447	10559	-	chr9	4068361	4431827	52046	-	*	0.6911	0.8303	0.22	0.27	1.31	0.47	1.1	0.66	1.76	0.16	0.41	3.27	0.62	0.14	1.63	0.44	0.96	0.64	3.05	0.32	0.3	1.58
cis_mRNA_overlap	0	Lnc-Overlap-mRNA	LTCONS_00311013	MTCONS_00310997	chr9	4429809	4431827	2019	-	chr9	4068361	4431827	52046	-	*	0.7069	0.8303	0.22	0.34	1.1	0.47	0.54	0.48	1.2	0.14	0.45	2.03	0.62	0.14	1.63	0.44	0.96	0.64	3.05	0.32	0.3	1.58
cis_mRNA_overlap	0	Lnc-CompleteIn-mRNAIntron	LTCONS_00311018	XM_017014882.1	chr9	4557113	4562165	5053	-	chr9	4540092	4666349	2420	-	*	0.9772	0.8293	0.13	0.21	0.88	0.12	0.21	0	1.19	0.18	0.11	2.4	0.07	0.23	0.47	0.07	0.11	0.02	0.48	0.05	0.13	1.54
cis_mRNA_dw20k	7140	NA	LTCONS_00311020	XM_011518009.2	chr9	4594608	4615385	10045	-	chr9	4510100	4587469	10934	+	*	0.7396	0.6121	0.22	0.19	1.47	0.34	0.15	0.06	2.05	0.21	0.17	3.34	0.24	0.18	3.24	0.88	0.86	0.38	1.5	0.28	0.46	2.19
cis_mRNA_overlap	0	Lnc-Overlap-mRNA	LTCONS_00311020	XM_011517952.1	chr9	4594608	4615385	10045	-	chr9	4598316	4662287	3758	-	*	0.63	0.7641	0.22	0.19	1.47	0.34	0.15	0.06	2.05	0.21	0.17	3.34	0	0	0.17	0	0	0	0.17	0	0	0.05
cis_mRNA_overlap	0	Lnc-Overlap-mRNA	LTCONS_00311020	XM_011517957.1	chr9	4594608	4615385	10045	-	chr9	4598316	4666436	3941	-	*	0.6057	0.8085	0.22	0.19	1.47	0.34	0.15	0.06	2.05	0.21	0.17	3.34	0.37	0.19	0.3	0.17	0.1	0.01	0.62	0.15	0	0.3
cis_mRNA_overlap	0	Lnc-Overlap-mRNA	LTCONS_00311020	XM_017014882.1	chr9	4594608	4615385	10045	-	chr9	4540092	4666349	2420	-	*	0.9448	0.6687	0.22	0.19	1.47	0.34	0.15	0.06	2.05	0.21	0.17	3.34	0.07	0.23	0.47	0.07	0.11	0.02	0.48	0.05	0.13	1.54
cis_mRNA_overlap	0	Lnc-Overlap-mRNA	LTCONS_00311020	XM_017014883.1	chr9	4594608	4615385	10045	-	chr9	4588331	4666349	1952	-	*	0.9697	0.6727	0.22	0.19	1.47	0.34	0.15	0.06	2.05	0.21	0.17	3.34	0.27	0.11	0.72	0.07	0.32	0.02	0.96	0.04	0.16	1.3
cis_mRNA_overlap	0	Lnc-Overlap-mRNA	LTCONS_00311021	XM_017014882.1	chr9	4594608	4615402	6693	-	chr9	4540092	4666349	2420	-	*	0.9905	0.9421	0.37	0.92	1.24	0.31	0.46	0.05	1.25	0.07	0.31	3.4	0.07	0.23	0.47	0.07	0.11	0.02	0.48	0.05	0.13	1.54
cis_mRNA_overlap	0	Lnc-Overlap-mRNA	LTCONS_00311021	XM_017014883.1	chr9	4594608	4615402	6693	-	chr9	4588331	4666349	1952	-	*	0.9017	0.9179	0.37	0.92	1.24	0.31	0.46	0.05	1.25	0.07	0.31	3.4	0.27	0.11	0.72	0.07	0.32	0.02	0.96	0.04	0.16	1.3
cis_mRNA_overlap	0	Lnc-Overlap-mRNA	LTCONS_00311038	XM_011517952.1	chr9	4648765	4662287	7565	-	chr9	4598316	4662287	3758	-	*	0.8508	0.789	0.42	0.1	1.17	0.12	0.62	0.1	2.25	0.41	0.13	1.39	0	0	0.17	0	0	0	0.17	0	0	0.05
cis_mRNA_overlap	0	Lnc-Overlap-mRNA	LTCONS_00311038	XM_011517957.1	chr9	4648765	4662287	7565	-	chr9	4598316	4666436	3941	-	*	0.8325	0.622	0.42	0.1	1.17	0.12	0.62	0.1	2.25	0.41	0.13	1.39	0.37	0.19	0.3	0.17	0.1	0.01	0.62	0.15	0	0.3
cis_mRNA_overlap	0	Lnc-Overlap-mRNA	LTCONS_00311038	XM_017014882.1	chr9	4648765	4662287	7565	-	chr9	4540092	4666349	2420	-	*	0.6081	0.6585	0.42	0.1	1.17	0.12	0.62	0.1	2.25	0.41	0.13	1.39	0.07	0.23	0.47	0.07	0.11	0.02	0.48	0.05	0.13	1.54
cis_mRNA_overlap	0	Lnc-Overlap-mRNA	LTCONS_00311038	XM_017014883.1	chr9	4648765	4662287	7565	-	chr9	4588331	4666349	1952	-	*	0.8769	0.8875	0.42	0.1	1.17	0.12	0.62	0.1	2.25	0.41	0.13	1.39	0.27	0.11	0.72	0.07	0.32	0.02	0.96	0.04	0.16	1.3
cis_mRNA_overlap	0	Lnc-CompleteIn-mRNAIntron	LTCONS_00311039	XM_011517957.1	chr9	4662618	4665988	3371	-	chr9	4598316	4666436	3941	-	*	0.8462	0.6626	0.78	0.39	1.27	0.3	1.08	0.12	2.3	0.41	0.37	1.04	0.37	0.19	0.3	0.17	0.1	0.01	0.62	0.15	0	0.3
cis_mRNA_overlap	0	Lnc-CompleteIn-mRNAIntron	LTCONS_00311039	XM_017014883.1	chr9	4662618	4665988	3371	-	chr9	4588331	4666349	1952	-	*	0.7574	0.8424	0.78	0.39	1.27	0.3	1.08	0.12	2.3	0.41	0.37	1.04	0.27	0.11	0.72	0.07	0.32	0.02	0.96	0.04	0.16	1.3
cis_mRNA_up10k	332	NA	LTCONS_00311039	XM_011517952.1	chr9	4662618	4665988	3371	-	chr9	4598316	4662287	3758	-	*	0.8297	0.7491	0.78	0.39	1.27	0.3	1.08	0.12	2.3	0.41	0.37	1.04	0	0	0.17	0	0	0	0.17	0	0	0.05
cis_mRNA_up10k	363	NA	LTCONS_00311039	XM_017014884.1	chr9	4662618	4665988	3371	-	chr9	4598316	4662256	3740	-	*	0.8309	0.6319	0.78	0.39	1.27	0.3	1.08	0.12	2.3	0.41	0.37	1.04	0.16	0.15	0.2	0	0	0.02	0.41	0.04	0	0.1
cis_mRNA_dw20k	11939	NA	LTCONS_00311116	MTCONS_00311117	chr9	5899272	5899968	697	-	chr9	5911906	6008479	10639	-	*	0.6882	0.903	0.39	0.12	0.47	0.15	0.41	0.3	0.96	0.21	0.19	1.32	0.36	0.14	0.82	0.19	0.94	0.68	0.72	0.35	0.33	0.91
cis_mRNA_overlap	0	Lnc-CompleteIn-mRNAIntron	LTCONS_00311116	XM_011517759.2	chr9	5899272	5899968	697	-	chr9	5894306	6008479	11187	-	*	0.9677	0.9544	0.39	0.12	0.47	0.15	0.41	0.3	0.96	0.21	0.19	1.32	0.45	0.26	0.46	0.24	0.4	0.29	0.63	0.34	0.29	0.72
cis_mRNA_dw20k	5821	NA	LTCONS_00311960	XM_005251440.4	chr9	33101122	33104822	3701	-	chr9	33110642	33167391	4108	-	*	0.962	0.6939	0.21	0.01	0.12	0.05	0.06	0.05	0.62	0.02	0.03	0.09	0.36	0	0.14	0	0	0.09	0.68	0	0.04	0
cis_mRNA_up10k	238	NA	LTCONS_00312243	XM_017015093.1	chr9	35690165	35690629	465	-	chr9	35682008	35689928	1115	-	*	0.7742	0.697	1.15	3.53	1.11	0.45	1.66	1.21	1.06	1.79	0.6	0.36	2.14	4.12	2.12	0.54	4.09	1.25	1.48	1.08	0.41	0.92
tran	24111131	NA	LTCONS_00312819	MTCONS_00312573	chr9	65300554	65317798	6151	-	chr9	41131309	41189424	7700	-	-3134.37	0.7731	0.6848	0.25	0.02	0.09	0.08	0.05	0.1	0.29	0.01	0.06	0.13	1.81	0.76	2.12	0.71	0.87	1.24	2.74	1.23	0.74	2.02
tran	2924069	NA	LTCONS_00312819	MTCONS_00306015	chr9	65300554	65317798	6151	-	chr9	68241866	68300035	7733	+	-3148.54	0.756	0.6687	0.25	0.02	0.09	0.08	0.05	0.1	0.29	0.01	0.06	0.13	1.63	0.67	1.71	0.51	1.03	1.37	4.2	1.55	1.03	2.38
cis_mRNA_up10k	717	NA	LTCONS_00313093	NM_001278243.1	chr9	72365308	72365759	452	-	chr9	72351425	72364592	5447	-	*	0.6357	0.7356	0.56	0	0.66	6.88	0.36	0.18	0.59	0	2.78	1.27	13.17	17.94	19.27	22.91	11.9	10.57	12.46	8.38	30.08	15.56
cis_mRNA_up10k	717	NA	LTCONS_00313093	NM_001278244.1	chr9	72365308	72365759	452	-	chr9	72351425	72364592	5310	-	*	0.6789	0.6809	0.56	0	0.66	6.88	0.36	0.18	0.59	0	2.78	1.27	0.15	0.44	1.39	15.38	0	0.47	6.87	1.42	22.14	16.03
cis_mRNA_dw20k	328	NA	LTCONS_00313278	NM_004297.3	chr9	77414782	77422752	7971	-	chr9	77423079	77648316	2491	-	*	0.6826	0.7599	0.41	0.05	0.72	0.23	0.13	0.05	1.12	0.02	0.04	0.85	2.31	0.24	2.28	1.38	0.22	0.2	1.47	0	0.36	1.24
cis_mRNA_up10k	160	NA	LTCONS_00313694	NM_002048.2	chr9	86947348	86947701	354	-	chr9	86944362	86947189	2828	-	*	0.8742	0.8185	1.23	0.11	0.47	0.1	0.53	0	0.61	0	0	0.41	1.77	0.08	0.52	0.68	0.15	0.06	0.94	0.04	0.04	0.67
tran	NA	NA	LTCONS_00317650	NM_005730.3	chrUn_GL000195v1	137954	152363	9931	+	chr12	57819927	57846964	5020	-	-3211.35	0.8604	0.7052	0.74	0.72	2.24	0.45	3.33	9.07	1.96	3.33	0.44	1.17	8.58	3.96	7.72	2.9	9.78	15.66	7.98	6.13	5.79	7.89
cis_mRNA_dw20k	5381	NA	LTCONS_00317684	XM_017030104.1	chrUn_GL000214v1	30364	68137	839	+	chrUn_GL000214v1	73517	117150	1984	-	*	0.9637	0.6542	0.15	3.14	0	0.03	0.12	3.03	0	0	1.76	0.24	0.01	0.13	0.04	0.01	0.02	0.15	0	0	0.07	0
tran	NA	NA	LTCONS_00317697	XM_006724939.3	chrUn_GL000218v1	55496	59257	3762	-	chrUn_KI270744v1	56676	65180	2237	+	-1701.53	0.9432	0.7561	0.39	1.08	1.12	0.14	1.48	6.66	1.22	2.63	1.45	2.48	0.03	0.06	0.04	0	0.04	0.4	0.02	0.06	0.1	0.19
tran	NA	NA	LTCONS_00317778	XM_017030105.1	chrUn_KI270744v1	446	6220	406	-	chr3_GL000221v1_random	27887	29488	975	+	-175.28	0.9812	0.6544	0	3.04	0.1	0.1	0.43	0.31	0	0	0	0.62	0.51	3.95	0.35	0.2	0.24	0.73	0.35	0	0.17	0.8
cis_mRNA_overlap	0	Lnc-Overlap-mRNA	LTCONS_00317785	MTCONS_00317786	chrUn_KI270744v1	118111	125966	1575	-	chrUn_KI270744v1	118111	140930	2418	-	-598	0.8349	0.6881	0	2	0	0	0	1.25	0	0	0	0.05	0	2.9	0	0	0	5.42	0	0	0.18	0
cis_mRNA_overlap	0	Lnc-Overlap-mRNA	LTCONS_00317785	MTCONS_00317787	chrUn_KI270744v1	118111	125966	1575	-	chrUn_KI270744v1	118111	140930	2402	-	-587.07	0.6344	0.6881	0	2	0	0	0	1.25	0	0	0	0.05	0	0.46	0	0	0	1.96	0	0	0.29	0
cis_mRNA_up10k	8375	NA	LTCONS_00317785	XM_017030171.1	chrUn_KI270744v1	118111	125966	1575	-	chrUn_KI270744v1	106833	109737	2905	-	-569.2	0.6056	0.636	0	2	0	0	0	1.25	0	0	0	0.05	0	0.03	0	0	0	0.14	0	0	0.03	0
cis_mRNA_overlap	0	Lnc-Overlap-mRNA	LTCONS_00317788	MTCONS_00317786	chrUn_KI270744v1	124398	126741	2344	-	chrUn_KI270744v1	118111	140930	2418	-	-878.33	0.9158	0.7554	0.12	0.78	0.4	0.08	0.29	4.21	0.29	0.41	0.5	0.58	0	2.9	0	0	0	5.42	0	0	0.18	0
cis_mRNA_overlap	0	Lnc-Overlap-mRNA	LTCONS_00317788	MTCONS_00317787	chrUn_KI270744v1	124398	126741	2344	-	chrUn_KI270744v1	118111	140930	2402	-	-880.03	0.983	0.7554	0.12	0.78	0.4	0.08	0.29	4.21	0.29	0.41	0.5	0.58	0	0.46	0	0	0	1.96	0	0	0.29	0
tran	14662	NA	LTCONS_00317788	XM_017030171.1	chrUn_KI270744v1	124398	126741	2344	-	chrUn_KI270744v1	106833	109737	2905	-	-827.84	0.9768	0.7439	0.12	0.78	0.4	0.08	0.29	4.21	0.29	0.41	0.5	0.58	0	0.03	0	0	0	0.14	0	0	0.03	0
tran	NA	NA	LTCONS_00317788	MTCONS_00221383	chrUn_KI270744v1	124398	126741	2344	-	chr4	53276	68221	821	+	-438.16	0.9399	0.6809	0.12	0.78	0.4	0.08	0.29	4.21	0.29	0.41	0.5	0.58	0.25	6.01	0.38	0.09	0.65	12.75	0.6	0.1	0.76	0.31
cis_mRNA_overlap	0	Lnc-AntiOverlap-mRNA	LTCONS_00318672	NM_004022.2	chrX	31949905	31979089	29185	+	chrX	31119228	32155469	7339	-	*	0.6737	0.6069	0.05	0	0.19	0.12	0	0.1	0.08	0	0	0.74	0	0	0	0.11	0	0	0	0	0	0.1
cis_mRNA_dw20k	204	NA	LTCONS_00319016	NM_001282849.1	chrX	47093517	47104712	11196	+	chrX	47078355	47093314	2041	+	*	0.6601	0.8182	1.11	0.77	1.82	0.4	0.72	0.84	1.44	0.81	0.31	2.55	11.71	5.73	6.43	0.19	2.21	5.33	5.36	0.42	0	8.75
cis_mRNA_dw20k	205	NA	LTCONS_00319016	XM_006724567.2	chrX	47093517	47104712	11196	+	chrX	47078419	47093313	1356	+	*	0.8818	0.9515	1.11	0.77	1.82	0.4	0.72	0.84	1.44	0.81	0.31	2.55	42.06	25.42	44.14	1.99	13.1	22.66	27.96	16.61	1.13	48.81
cis_mRNA_dw20k	205	NA	LTCONS_00319016	XM_017029954.1	chrX	47093517	47104712	11196	+	chrX	47078299	47093313	1964	+	*	0.648	0.7818	1.11	0.77	1.82	0.4	0.72	0.84	1.44	0.81	0.31	2.55	3.18	2.18	2.59	0.58	0	0.97	0.82	0.71	0.03	2.6
cis_mRNA_overlap	0	Lnc-Overlap-mRNA	LTCONS_00319638	XM_017029484.1	chrX	65034834	65113846	1527	+	chrX	65034815	65507887	8134	+	-888.17	0.6862	0.6394	0.56	0.64	0.36	0.81	0.19	0	0.05	0.11	0	0.27	0	0.02	0.02	0.06	0.03	0	0	0	0	0
cis_mRNA_overlap	0	Lnc-Overlap-mRNA	LTCONS_00319940	XM_017029583.1	chrX	73678886	73687218	6821	+	chrX	73577407	73687102	6590	+	-2099.95	0.8877	0.7025	0.06	0	0.37	0	0.12	0	0.18	0	0	0.17	0	0	0.73	0.24	0.18	0.18	0.35	0.12	0	0.47
cis_mRNA_overlap	0	Lnc-Overlap-mRNA	LTCONS_00320836	NM_001324331.1	chrX	111096142	111129203	6726	+	chrX	111096142	111227361	9027	+	*	0.8653	0.7006	0.17	0.39	0.58	0.21	1.47	2.14	0.18	0.02	1.26	0.08	0	0	0	0	0.05	0.1	0	0	0	0
cis_mRNA_overlap	0	Lnc-Overlap-mRNA	LTCONS_00322522	XM_011545464.2	chrX	9024105	9164649	4197	-	chrX	9025073	9197176	1835	-	-756.12	0.9707	0.922	0.06	0.21	0.16	0.15	0	0.65	0	0.01	0.81	0.39	0	0.12	0.1	0.14	0	0.52	0	0	0.48	0.35
cis_mRNA_overlap	0	Lnc-Overlap-mRNA	LTCONS_00322941	NM_014332.2	chrX	21731854	21770752	6452	-	chrX	21705972	21758160	935	-	-486.58	0.8121	0.7959	0	0.08	0	0	0	0.1	0.08	0.74	0.78	0	0	0.15	0	0.03	0	0.06	0	0.13	0.22	0
tran	NA	NA	LTCONS_00323057	MTCONS_00148663	chrX	27397915	27399005	992	-	chr19	9523224	9538673	7360	-	-815.04	-0.6112	-0.6554	0	0.17	0.09	0.02	0.51	0	0	0.39	0.6	0	0.86	0.37	0.58	0.36	0.62	0.82	0.58	0.47	0.08	0.74
cis_mRNA_up10k	8474	NA	LTCONS_00325068	NM_001171020.1	chrX	106155532	106159832	2556	-	chrX	106168305	106208956	4173	+	*	0.7792	0.7285	0.05	0.19	0.1	0.04	0.06	0.19	0	0	0.93	0	0.91	4.16	0.49	0.87	0.72	0.32	0	0	4.48	0.28
cis_mRNA_up10k	8475	NA	LTCONS_00325068	XM_011530856.1	chrX	106155532	106159832	2556	-	chrX	106168306	106208961	4172	+	*	0.8633	0.7269	0.05	0.19	0.1	0.04	0.06	0.19	0	0	0.93	0	0	0.47	0.12	0	0	0	0	0	0.67	0
tran	NA	NA	LTCONS_00325554	MTCONS_00179877	chrX	126280956	126460340	938	-	chr2	228474395	228568713	2102	-	-381.54	0.8119	0.7957	0.03	1.22	0.03	0	0.14	0.06	0.1	0.33	1.12	0.04	0	0.69	0.05	0	0.1	0.2	0.07	0.03	0.22	0.02
tran	NA	NA	LTCONS_00325554	MTCONS_00206877	chrX	126280956	126460340	938	-	chr3	112664716	112820581	1361	+	-415.15	0.7531	0.7477	0.03	1.22	0.03	0	0.14	0.06	0.1	0.33	1.12	0.04	0.05	1.24	0.37	0.15	0.48	0.63	0.19	0.4	0.52	0.12
cis_mRNA_overlap	0	Lnc-AntiOverlap-mRNA	LTCONS_00325873	MTCONS_00321548	chrX	135285787	135344109	6871	-	chrX	135344098	135363413	6369	+	*	0.6857	0.6095	0	0	0	0.11	0.47	0.37	0	0.24	0	0	0.51	0.67	0.78	0.39	1	2.39	0.1	1.92	0.67	0.64
cis_mRNA_overlap	0	Lnc-Overlap-mRNA	LTCONS_00325875	NM_007131.4	chrX	135285787	135344109	6095	-	chrX	135285787	135344087	5593	-	-2647.67	0.6121	0.7664	0.12	0	0	0	0	0.12	0	0	0	0.16	1.52	1.06	1.05	1.05	0.59	1.16	0.65	0.37	0.86	1.08
cis_mRNA_overlap	0	Lnc-AntiCompleteIn-mRNAExon	LTCONS_00325979	XM_005262397.4	chrX	139561538	139562396	859	-	chrX	139530720	139563459	2690	+	-1661.6	0.6805	0.8218	0.39	0.09	0.04	0.6	0.08	0	0.26	0	0.24	0.05	4.48	0	0	1.73	0	0	0.01	0	2.31	0
cis_mRNA_up10k	2384	NA	LTCONS_00326115	XM_005262349.4	chrX	149527591	149541638	3807	-	chrX	149544021	149547309	2094	+	*	0.6057	0.6487	0	0	0	0	0	0	0.2	0.17	0.28	0	0.79	0.78	0.94	0.59	0.77	1.17	0.8	1.27	1.34	0.4
cis_mRNA_overlap	0	Lnc-AntiOverlap-mRNA	LTCONS_00326119	NM_001324277.1	chrX	149527591	149541638	3331	-	chrX	149540974	149548331	2908	+	*	0.8103	0.6629	0.11	0	0.06	0.04	0	0.09	0	0	0	0	0.46	0.18	0.28	0.08	0.06	0.19	0.08	0.12	0.09	0.09
cis_mRNA_dw20k	9566	NA	LTCONS_00326235	XM_006724857.3	chrX	152574683	152698696	862	-	chrX	152708261	152709391	973	-	*	0.9926	1	0	0.95	0	0	0	1.76	0	0	0.06	0	0	0.46	0	0	0	1.07	0	0	0.11	0
cis_mRNA_overlap	0	mRNA-AntiCompleteIn-LncIntron	LTCONS_00326235	XM_011531184.2	chrX	152574683	152698696	862	-	chrX	152637895	152659827	2465	+	*	0.6859	0.6147	0	0.95	0	0	0	1.76	0	0	0.06	0	0	0.02	0	0	0.08	0.1	0	0	0	0
cis_mRNA_up10k	146	NA	LTCONS_00326235	XM_006724818.2	chrX	152574683	152698696	862	-	chrX	152698841	152702347	1880	+	*	0.9979	0.862	0	0.95	0	0	0	1.76	0	0	0.06	0	0	0.34	0	0	0	0.72	0	0	0	0
cis_mRNA_up10k	47	NA	LTCONS_00326235	XM_005274676.3	chrX	152574683	152698696	862	-	chrX	152698742	152702347	1798	+	*	0.995	0.862	0	0.95	0	0	0	1.76	0	0	0.06	0	0	1.48	0	0	0	2.26	0	0	0	0
cis_mRNA_up10k	512	NA	LTCONS_00326235	XM_011531160.2	chrX	152574683	152698696	862	-	chrX	152699207	152702347	1704	+	*	0.8115	0.6881	0	0.95	0	0	0	1.76	0	0	0.06	0	0	0.21	0	0.07	0	0.14	0	0	0	0
cis_mRNA_up10k	57	NA	LTCONS_00326235	NM_005362.3	chrX	152574683	152698696	862	-	chrX	152698752	152702347	1724	+	*	0.9892	1	0	0.95	0	0	0	1.76	0	0	0.06	0	0	24.5	0	0	0	33.99	0	0	0.19	0
cis_mRNA_up10k	611	NA	LTCONS_00326235	XM_011531161.2	chrX	152574683	152698696	862	-	chrX	152699306	152702347	2129	+	*	0.9952	0.862	0	0.95	0	0	0	1.76	0	0	0.06	0	0	0.43	0	0	0	0.66	0	0	0	0
cis_mRNA_dw20k	13108	NA	LTCONS_00326239	NM_001102576.2	chrX	152708261	152714377	1768	-	chrX	152727484	152733736	660	-	-387.32	0.9987	0.7474	0	0.09	0	0	0	0.3	0	0	0	0	0	10.41	0.05	0.04	0	29.39	0	0	0.19	0
cis_mRNA_dw20k	5915	NA	LTCONS_00326239	NM_005362.3	chrX	152708261	152714377	1768	-	chrX	152698752	152702347	1724	+	*	0.9351	0.862	0	0.09	0	0	0	0.3	0	0	0	0	0	24.5	0	0	0	33.99	0	0	0.19	0
cis_mRNA_dw20k	5915	NA	LTCONS_00326239	XM_005274676.3	chrX	152708261	152714377	1768	-	chrX	152698742	152702347	1798	+	*	0.9515	1	0	0.09	0	0	0	0.3	0	0	0	0	0	1.48	0	0	0	2.26	0	0	0	0
cis_mRNA_dw20k	5915	NA	LTCONS_00326239	XM_006724818.2	chrX	152708261	152714377	1768	-	chrX	152698841	152702347	1880	+	*	0.9871	1	0	0.09	0	0	0	0.3	0	0	0	0	0	0.34	0	0	0	0.72	0	0	0	0
cis_mRNA_dw20k	5915	NA	LTCONS_00326239	XM_011531160.2	chrX	152708261	152714377	1768	-	chrX	152699207	152702347	1704	+	*	0.685	0.8408	0	0.09	0	0	0	0.3	0	0	0	0	0	0.21	0	0.07	0	0.14	0	0	0	0
cis_mRNA_dw20k	5915	NA	LTCONS_00326239	XM_011531161.2	chrX	152708261	152714377	1768	-	chrX	152699306	152702347	2129	+	*	0.9523	1	0	0.09	0	0	0	0.3	0	0	0	0	0	0.43	0	0	0	0.66	0	0	0	0
cis_mRNA_overlap	0	Lnc-Overlap-mRNA	LTCONS_00326239	XM_006724857.3	chrX	152708261	152714377	1768	-	chrX	152708261	152709391	973	-	-497.07	0.9885	0.862	0	0.09	0	0	0	0.3	0	0	0	0	0	0.46	0	0	0	1.07	0	0	0.11	0
cis_mRNA_up10k	153	NA	LTCONS_00326239	XM_017029406.1	chrX	152708261	152714377	1768	-	chrX	152714529	152718607	1985	+	*	1	1	0	0.09	0	0	0	0.3	0	0	0	0	0	0.67	0	0	0	2.22	0	0	0	0
cis_mRNA_up10k	210	NA	LTCONS_00326239	NM_001321400.1	chrX	152708261	152714377	1768	-	chrX	152714586	152718607	2026	+	*	0.9934	1	0	0.09	0	0	0	0.3	0	0	0	0	0	0.97	0	0	0	2.3	0	0	0	0
cis_mRNA_up10k	210	NA	LTCONS_00326239	NM_001321401.1	chrX	152708261	152714377	1768	-	chrX	152714586	152718607	2010	+	*	0.9999	1	0	0.09	0	0	0	0.3	0	0	0	0	0	0.37	0	0	0	1.31	0	0	0	0
cis_mRNA_up10k	210	NA	LTCONS_00326239	NM_001321402.1	chrX	152708261	152714377	1768	-	chrX	152714586	152718607	1947	+	*	0.934	0.7894	0	0.09	0	0	0	0.3	0	0	0	0	0	0.38	0	0	0	0.53	0.01	0	0.05	0
cis_mRNA_up10k	210	NA	LTCONS_00326239	NM_001321403.1	chrX	152708261	152714377	1768	-	chrX	152714586	152718607	1849	+	*	0.9297	0.862	0	0.09	0	0	0	0.3	0	0	0	0	0	0.29	0	0	0	0.4	0	0	0.05	0
cis_mRNA_up10k	210	NA	LTCONS_00326239	NM_153488.4	chrX	152708261	152714377	1768	-	chrX	152714586	152718607	1729	+	*	0.9084	0.862	0	0.09	0	0	0	0.3	0	0	0	0	0.01	0.18	0	0	0	0.22	0	0	0	0
tran	44842	NA	LTCONS_00326239	NM_001129826.2	chrX	152708261	152714377	1768	-	chrX	152759218	152760222	847	+	-458.99	0.995	1	0	0.09	0	0	0	0.3	0	0	0	0	0	0.45	0	0	0	1.11	0	0	0	0
tran	44842	NA	LTCONS_00326239	NM_001129828.2	chrX	152708261	152714377	1768	-	chrX	152759218	152760222	796	+	-436.03	0.9975	0.862	0	0.09	0	0	0	0.3	0	0	0	0	0	0.38	0.04	0	0	1.62	0	0	0	0
cis_mRNA_dw20k	12999	NA	LTCONS_00326240	NM_001102576.2	chrX	152708261	152714486	733	-	chrX	152727484	152733736	660	-	-320.23	0.9867	0.6893	0.12	2	0	0.11	0	3.74	0	0	0.13	0.12	0	10.41	0.05	0.04	0	29.39	0	0	0.19	0
cis_mRNA_dw20k	5915	NA	LTCONS_00326240	NM_005362.3	chrX	152708261	152714486	733	-	chrX	152698752	152702347	1724	+	*	0.9873	0.8413	0.12	2	0	0.11	0	3.74	0	0	0.13	0.12	0	24.5	0	0	0	33.99	0	0	0.19	0
cis_mRNA_dw20k	5915	NA	LTCONS_00326240	XM_005274676.3	chrX	152708261	152714486	733	-	chrX	152698742	152702347	1798	+	*	0.9936	0.7252	0.12	2	0	0.11	0	3.74	0	0	0.13	0.12	0	1.48	0	0	0	2.26	0	0	0	0
cis_mRNA_dw20k	5915	NA	LTCONS_00326240	XM_006724818.2	chrX	152708261	152714486	733	-	chrX	152698841	152702347	1880	+	*	0.9978	0.7252	0.12	2	0	0.11	0	3.74	0	0	0.13	0.12	0	0.34	0	0	0	0.72	0	0	0	0
cis_mRNA_dw20k	5915	NA	LTCONS_00326240	XM_011531160.2	chrX	152708261	152714486	733	-	chrX	152699207	152702347	1704	+	*	0.8119	0.6406	0.12	2	0	0.11	0	3.74	0	0	0.13	0.12	0	0.21	0	0.07	0	0.14	0	0	0	0
cis_mRNA_dw20k	5915	NA	LTCONS_00326240	XM_011531161.2	chrX	152708261	152714486	733	-	chrX	152699306	152702347	2129	+	*	0.9938	0.7252	0.12	2	0	0.11	0	3.74	0	0	0.13	0.12	0	0.43	0	0	0	0.66	0	0	0	0
cis_mRNA_overlap	0	Lnc-Overlap-mRNA	LTCONS_00326240	XM_006724857.3	chrX	152708261	152714486	733	-	chrX	152708261	152709391	973	-	-340.85	0.9918	0.8413	0.12	2	0	0.11	0	3.74	0	0	0.13	0.12	0	0.46	0	0	0	1.07	0	0	0.11	0
cis_mRNA_up10k	101	NA	LTCONS_00326240	NM_001321400.1	chrX	152708261	152714486	733	-	chrX	152714586	152718607	2026	+	*	0.9946	0.7252	0.12	2	0	0.11	0	3.74	0	0	0.13	0.12	0	0.97	0	0	0	2.3	0	0	0	0
cis_mRNA_up10k	101	NA	LTCONS_00326240	NM_001321401.1	chrX	152708261	152714486	733	-	chrX	152714586	152718607	2010	+	*	0.9736	0.7252	0.12	2	0	0.11	0	3.74	0	0	0.13	0.12	0	0.37	0	0	0	1.31	0	0	0	0
cis_mRNA_up10k	101	NA	LTCONS_00326240	NM_001321402.1	chrX	152708261	152714486	733	-	chrX	152714586	152718607	1947	+	*	0.9862	0.6962	0.12	2	0	0.11	0	3.74	0	0	0.13	0.12	0	0.38	0	0	0	0.53	0.01	0	0.05	0
cis_mRNA_up10k	101	NA	LTCONS_00326240	NM_001321403.1	chrX	152708261	152714486	733	-	chrX	152714586	152718607	1849	+	*	0.9837	0.8413	0.12	2	0	0.11	0	3.74	0	0	0.13	0.12	0	0.29	0	0	0	0.4	0	0	0.05	0
cis_mRNA_up10k	101	NA	LTCONS_00326240	NM_001321404.1	chrX	152708261	152714486	733	-	chrX	152714586	152718607	1663	+	*	0.6766	0.6406	0.12	2	0	0.11	0	3.74	0	0	0.13	0.12	0	0.14	0	0.01	0	0.05	0	0	0	0
cis_mRNA_up10k	101	NA	LTCONS_00326240	NM_153488.4	chrX	152708261	152714486	733	-	chrX	152714586	152718607	1729	+	*	0.9746	0.7487	0.12	2	0	0.11	0	3.74	0	0	0.13	0.12	0.01	0.18	0	0	0	0.22	0	0	0	0
cis_mRNA_up10k	44	NA	LTCONS_00326240	XM_017029406.1	chrX	152708261	152714486	733	-	chrX	152714529	152718607	1985	+	*	0.9777	0.7252	0.12	2	0	0.11	0	3.74	0	0	0.13	0.12	0	0.67	0	0	0	2.22	0	0	0	0
tran	44733	NA	LTCONS_00326240	NM_001129826.2	chrX	152708261	152714486	733	-	chrX	152759218	152760222	847	+	-336.02	0.9931	0.7252	0.12	2	0	0.11	0	3.74	0	0	0.13	0.12	0	0.45	0	0	0	1.11	0	0	0	0
cis_mRNA_dw20k	5915	NA	LTCONS_00326241	NM_005362.3	chrX	152708261	152714486	740	-	chrX	152698752	152702347	1724	+	*	0.722	0.8408	0	0.78	0	0	0	0.2	0	0	0	0	0	24.5	0	0	0	33.99	0	0	0.19	0
cis_mRNA_dw20k	5915	NA	LTCONS_00326241	XM_005274676.3	chrX	152708261	152714486	740	-	chrX	152698742	152702347	1798	+	*	0.6869	0.9753	0	0.78	0	0	0	0.2	0	0	0	0	0	1.48	0	0	0	2.26	0	0	0	0
cis_mRNA_dw20k	5915	NA	LTCONS_00326241	XM_011531160.2	chrX	152708261	152714486	740	-	chrX	152699207	152702347	1704	+	*	0.8979	0.862	0	0.78	0	0	0	0.2	0	0	0	0	0	0.21	0	0.07	0	0.14	0	0	0	0
cis_mRNA_dw20k	5915	NA	LTCONS_00326241	XM_011531161.2	chrX	152708261	152714486	740	-	chrX	152699306	152702347	2129	+	*	0.685	0.9753	0	0.78	0	0	0	0.2	0	0	0	0	0	0.43	0	0	0	0.66	0	0	0	0
cis_mRNA_up10k	101	NA	LTCONS_00326241	NM_001321402.1	chrX	152708261	152714486	740	-	chrX	152714586	152718607	1947	+	*	0.7157	0.7699	0	0.78	0	0	0	0.2	0	0	0	0	0	0.38	0	0	0	0.53	0.01	0	0.05	0
cis_mRNA_up10k	101	NA	LTCONS_00326241	NM_001321403.1	chrX	152708261	152714486	740	-	chrX	152714586	152718607	1849	+	*	0.7179	0.8408	0	0.78	0	0	0	0.2	0	0	0	0	0	0.29	0	0	0	0.4	0	0	0.05	0
cis_mRNA_up10k	101	NA	LTCONS_00326241	NM_001321404.1	chrX	152708261	152714486	740	-	chrX	152714586	152718607	1663	+	*	0.9934	0.862	0	0.78	0	0	0	0.2	0	0	0	0	0	0.14	0	0.01	0	0.05	0	0	0	0
cis_mRNA_up10k	101	NA	LTCONS_00326241	NM_153488.4	chrX	152708261	152714486	740	-	chrX	152714586	152718607	1729	+	*	0.7665	0.8408	0	0.78	0	0	0	0.2	0	0	0	0	0.01	0.18	0	0	0	0.22	0	0	0	0
cis_mRNA_dw20k	16128	NA	LTCONS_00326243	NM_001282501.1	chrX	152727484	152733736	718	-	chrX	152749863	152753884	1947	-	*	0.9815	0.8937	0	7.46	0	0	0.05	15.08	0.05	0	0.05	0	0	0.38	0	0	0	0.53	0.01	0	0.05	0
cis_mRNA_dw20k	16128	NA	LTCONS_00326243	NM_001282502.1	chrX	152727484	152733736	718	-	chrX	152749863	152753884	1849	-	*	0.978	0.8147	0	7.46	0	0	0.05	15.08	0.05	0	0.05	0	0	0.29	0	0	0	0.4	0	0	0.05	0
cis_mRNA_dw20k	16128	NA	LTCONS_00326243	NM_175742.2	chrX	152727484	152733736	718	-	chrX	152749863	152753884	2010	-	*	0.9806	0.7579	0	7.46	0	0	0.05	15.08	0.05	0	0.05	0	0	0.37	0	0	0	1.31	0	0	0	0
cis_mRNA_dw20k	16128	NA	LTCONS_00326243	NM_175743.2	chrX	152727484	152733736	718	-	chrX	152749863	152753884	2026	-	*	0.9979	0.7579	0	7.46	0	0	0.05	15.08	0.05	0	0.05	0	0	0.97	0	0	0	2.3	0	0	0	0
cis_mRNA_dw20k	16128	NA	LTCONS_00326243	XM_017029519.1	chrX	152727484	152733736	718	-	chrX	152749863	152753942	1986	-	*	0.9739	0.7579	0	7.46	0	0	0.05	15.08	0.05	0	0.05	0	0	0.03	0	0	0	0.12	0	0	0	0
cis_mRNA_dw20k	8878	NA	LTCONS_00326243	NM_001321400.1	chrX	152727484	152733736	718	-	chrX	152714586	152718607	2026	+	*	0.9979	0.7579	0	7.46	0	0	0.05	15.08	0.05	0	0.05	0	0	0.97	0	0	0	2.3	0	0	0	0
cis_mRNA_dw20k	8878	NA	LTCONS_00326243	NM_001321401.1	chrX	152727484	152733736	718	-	chrX	152714586	152718607	2010	+	*	0.9806	0.7579	0	7.46	0	0	0.05	15.08	0.05	0	0.05	0	0	0.37	0	0	0	1.31	0	0	0	0
cis_mRNA_dw20k	8878	NA	LTCONS_00326243	NM_001321402.1	chrX	152727484	152733736	718	-	chrX	152714586	152718607	1947	+	*	0.9815	0.8937	0	7.46	0	0	0.05	15.08	0.05	0	0.05	0	0	0.38	0	0	0	0.53	0.01	0	0.05	0
cis_mRNA_dw20k	8878	NA	LTCONS_00326243	NM_001321403.1	chrX	152727484	152733736	718	-	chrX	152714586	152718607	1849	+	*	0.978	0.8147	0	7.46	0	0	0.05	15.08	0.05	0	0.05	0	0	0.29	0	0	0	0.4	0	0	0.05	0
cis_mRNA_dw20k	8878	NA	LTCONS_00326243	XM_017029406.1	chrX	152727484	152733736	718	-	chrX	152714529	152718607	1985	+	*	0.9841	0.7579	0	7.46	0	0	0.05	15.08	0.05	0	0.05	0	0	0.67	0	0	0	2.22	0	0	0	0
cis_mRNA_up10k	127	NA	LTCONS_00326243	NM_001166386.3	chrX	152727484	152733736	718	-	chrX	152733862	152737669	1862	+	*	0.963	0.7579	0	7.46	0	0	0.05	15.08	0.05	0	0.05	0	0	0.07	0	0	0	0.34	0	0	0	0
cis_mRNA_up10k	44	NA	LTCONS_00326243	NM_001166387.3	chrX	152727484	152733736	718	-	chrX	152733779	152737669	1770	+	*	0.9963	0.7579	0	7.46	0	0	0.05	15.08	0.05	0	0.05	0	0	2.94	0	0	0	4.93	0	0	0	0
cis_mRNA_up10k	44	NA	LTCONS_00326243	NM_005367.6	chrX	152727484	152733736	718	-	chrX	152733779	152737669	1664	+	*	0.9588	0.7644	0	7.46	0	0	0.05	15.08	0.05	0	0.05	0	0	11.49	0	0.03	0.06	13.12	0	0.02	0.1	0
tran	18094	NA	LTCONS_00326243	XM_006724857.3	chrX	152727484	152733736	718	-	chrX	152708261	152709391	973	-	-365.58	0.9933	0.8147	0	7.46	0	0	0.05	15.08	0.05	0	0.05	0	0	0.46	0	0	0	1.07	0	0	0.11	0
tran	25483	NA	LTCONS_00326243	NM_001129826.2	chrX	152727484	152733736	718	-	chrX	152759218	152760222	847	+	-361.04	0.9968	0.7579	0	7.46	0	0	0.05	15.08	0.05	0	0.05	0	0	0.45	0	0	0	1.11	0	0	0	0
cis_mRNA_dw20k	10248	NA	LTCONS_00326548	NM_001195081.1	chrX	9978249	9981874	3626	.	chrX	9967358	9968002	645	+	*	0.6098	0.7079	0.01	0.01	0.18	0.01	0.01	0.06	0.12	0	0.01	0.08	0	0	0.05	0	0	0.11	0.1	0	0	0
cis_mRNA_overlap	0	Lnc-AntiOverlap-mRNA	LTCONS_00327189	MTCONS_00327689	chrY	13479210	13482136	2927	+	chrY	13248379	13480670	8913	-	-2690.79	0.8466	0.9058	0.22	0.46	0.58	0.45	0	0.56	0.55	0	0.16	0.91	0.85	0.56	2.22	0.99	0.41	2.56	1.76	0.21	0.24	2.36
cis_mRNA_overlap	0	Lnc-AntiOverlap-mRNA	LTCONS_00327189	MTCONS_00327731	chrY	13479210	13482136	2927	+	chrY	13327157	13480670	12713	-	*	0.8283	0.8754	0.22	0.46	0.58	0.45	0	0.56	0.55	0	0.16	0.91	0.47	0.22	1.31	0.39	0.29	1.22	1.13	0.1	0.17	1.39
cis_mRNA_overlap	0	Lnc-AntiOverlap-mRNA	LTCONS_00327189	MTCONS_00327732	chrY	13479210	13482136	2927	+	chrY	13337053	13480670	22028	-	*	0.8451	0.9179	0.22	0.46	0.58	0.45	0	0.56	0.55	0	0.16	0.91	0.94	0.44	2.24	0.69	0.42	2.19	2.2	0.18	0.26	2.62
cis_mRNA_overlap	0	Lnc-AntiOverlap-mRNA	LTCONS_00327189	NM_001258261.1	chrY	13479210	13482136	2927	+	chrY	13248379	13480670	6652	-	-2690.79	0.8265	0.8712	0.22	0.46	0.58	0.45	0	0.56	0.55	0	0.16	0.91	0.03	0.04	0.06	0	0	0.03	0.06	0	0	0.07
cis_mRNA_overlap	0	Lnc-AntiOverlap-mRNA	LTCONS_00327189	NM_001258265.1	chrY	13479210	13482136	2927	+	chrY	13248379	13480670	6277	-	-2688.97	0.7761	0.7198	0.22	0.46	0.58	0.45	0	0.56	0.55	0	0.16	0.91	0.02	0	0.1	0.06	0	0.05	0	0	0	0.22
cis_mRNA_overlap	0	Lnc-AntiOverlap-mRNA	LTCONS_00327189	NM_182659.1	chrY	13479210	13482136	2927	+	chrY	13297509	13480670	4922	-	-2690.79	0.8255	0.7781	0.22	0.46	0.58	0.45	0	0.56	0.55	0	0.16	0.91	0.23	0.09	0.47	0.25	0.18	0.56	0.49	0.15	0.22	0.81
cis_mRNA_overlap	0	Lnc-AntiOverlap-mRNA	LTCONS_00327189	XM_006724875.3	chrY	13479210	13482136	2927	+	chrY	13299977	13480016	4123	-	*	0.7484	0.6657	0.22	0.46	0.58	0.45	0	0.56	0.55	0	0.16	0.91	0	0	0	0	0	0.05	0.07	0	0	0.16
cis_mRNA_overlap	0	Lnc-AntiOverlap-mRNA	LTCONS_00327189	XM_011531452.2	chrY	13479210	13482136	2927	+	chrY	13230770	13480016	8425	-	*	0.651	0.7939	0.22	0.46	0.58	0.45	0	0.56	0.55	0	0.16	0.91	0.61	0.09	0.95	0	0	1.34	0.98	0	0.05	0.78
cis_mRNA_overlap	0	Lnc-AntiOverlap-mRNA	LTCONS_00327189	XM_011531459.2	chrY	13479210	13482136	2927	+	chrY	13260318	13480016	4601	-	*	0.7685	0.9293	0.22	0.46	0.58	0.45	0	0.56	0.55	0	0.16	0.91	0	0.08	0.47	0.14	0	0.16	0.26	0	0.07	0.29
cis_mRNA_overlap	0	Lnc-AntiOverlap-mRNA	LTCONS_00327189	XM_017030074.1	chrY	13479210	13482136	2927	+	chrY	13248379	13480016	7279	-	*	0.8139	0.8303	0.22	0.46	0.58	0.45	0	0.56	0.55	0	0.16	0.91	0.1	0	0.52	0.18	0.1	0.44	0.37	0	0	1.53
cis_mRNA_overlap	0	Lnc-Overlap-mRNA	LTCONS_00327798	XM_017030091.1	chrY	18993045	19076707	58109	-	chrY	19039939	19049347	4067	-	*	0.9951	0.8788	0.37	0.08	1.37	0.27	0.16	1.24	1.25	0.09	0.05	0.99	0.3	0.12	1.31	0.28	0.11	1.19	1.11	0.05	0.13	0.86
tran	NA	NA	NONHSAT000008.2	MTCONS_00101882	chr1	16858	17751	717	-	chr15	101961595	101976603	2018	+	-611.62	0.8077	0.8211	0	0.48	0	0	1.22	1.19	0.87	3.07	0	0	0.94	2.03	1.96	0.78	3.94	3.38	1.01	4.24	0.82	1.86
cis_mRNA_overlap	0	Lnc-Overlap-mRNA	NONHSAT000097.2	XM_017002411.1	chr1	701936	720150	629	-	chr1	683910	711842	5248	-	*	0.8964	0.9047	0	0.13	0.47	0.13	0.82	1.95	0.76	1.5	0.13	0.22	0.03	0.18	0.2	0.18	0.63	0.77	0.24	0.49	0.13	0.08
tran	NA	NA	NONHSAT000097.2	MTCONS_00000362	chr1	701936	720150	629	-	NW_017852933.1	816316	898761	7393	-	-460.06	0.9255	0.8774	0	0.13	0.47	0.13	0.82	1.95	0.76	1.5	0.13	0.22	2.28	1.62	2.38	1.73	4.35	6.97	2.89	4.36	1.21	2.91
tran	NA	NA	NONHSAT000097.2	MTCONS_00117184	chr1	701936	720150	629	-	chr16	67680716	67692246	5245	-	-586.13	0.6235	0.7161	0	0.13	0.47	0.13	0.82	1.95	0.76	1.5	0.13	0.22	0.28	0	0.38	0.2	0.34	0.36	0.41	0.58	0	0.36
tran	NA	NA	NONHSAT000097.2	MTCONS_00250945	chr1	701936	720150	629	-	chr5	157021949	157059119	9794	-	-422.81	0.7578	0.8406	0	0.13	0.47	0.13	0.82	1.95	0.76	1.5	0.13	0.22	0.04	0.02	0.13	0.03	1.21	2.4	0.19	0.16	0.14	0.08
cis_mRNA_dw20k	6090	NA	NONHSAT000234.2	MTCONS_00000679	chr1	1062208	1063288	829	+	chr1	1020102	1056119	7870	+	*	0.8746	0.7442	0	0.03	0.11	0	0.46	0	0	0.21	0	0	0.39	0.29	0.69	0.08	1.16	0.46	0.51	0.95	0.12	0.1
cis_mRNA_dw20k	6090	NA	NONHSAT000234.2	NM_198576.3	chr1	1062208	1063288	829	+	chr1	1020123	1056119	7326	+	*	0.9455	0.8876	0	0.03	0.11	0	0.46	0	0	0.21	0	0	2.79	2.9	3.62	2.29	15.13	2.88	2.34	4.25	1.61	0.76
cis_mRNA_overlap	0	Lnc-CompleteIn-mRNAExon	NONHSAT000289.2	NM_001282585.1	chr1	1352692	1358547	757	-	chr1	1352689	1358547	2008	-	-642.68	0.7312	0.6833	1.45	0.03	1.29	0	0.41	0.24	0.75	0.58	0.12	1.19	0.05	0	0.06	0	0	0	0	0	0	0
cis_mRNA_up10k	1420	NA	NONHSAT000451.2	NM_003820.3	chr1	2550078	2554946	2442	-	chr1	2556365	2565622	3501	+	*	0.7343	0.7091	0.13	0.07	0.23	0	0.24	0.72	0.04	0.63	0.06	0.19	2.06	2.49	2.05	1.1	1.91	2.78	1.68	2.75	0.77	1.53
cis_mRNA_up10k	1644	NA	NONHSAT000451.2	XM_006711019.2	chr1	2550078	2554946	2442	-	chr1	2556589	2563825	1376	+	*	0.78	0.7939	0.13	0.07	0.23	0	0.24	0.72	0.04	0.63	0.06	0.19	4.95	5.94	4.41	3.24	6.08	7.47	1.85	7	2.74	3.16
cis_mRNA_up10k	1644	NA	NONHSAT000451.2	XM_017002720.1	chr1	2550078	2554946	2442	-	chr1	2556589	2563829	2426	+	*	0.8109	0.8545	0.13	0.07	0.23	0	0.24	0.72	0.04	0.63	0.06	0.19	2.86	2.43	3.32	1.9	3.44	4.99	2.83	3.94	0.5	2.27
cis_mRNA_up10k	4189	NA	NONHSAT000451.2	XM_017002718.1	chr1	2550078	2554946	2442	-	chr1	2559134	2563829	1831	+	*	0.6916	0.693	0.13	0.07	0.23	0	0.24	0.72	0.04	0.63	0.06	0.19	0.2	0.42	0.3	0.21	0.73	0.5	0.29	1.07	0.19	0.21
cis_mRNA_dw20k	543	NA	NONHSAT000538.2	NM_001204187.1	chr1	3736743	3747341	5664	-	chr1	3652565	3736201	4900	+	*	0.8534	0.7428	0	0	0	0	0.1	0.34	0.18	0.24	0.06	0	0	0	0	0	0	0.06	0	0.06	0	0
cis_mRNA_dw20k	543	NA	NONHSAT000538.2	NM_005427.3	chr1	3736743	3747341	5664	-	chr1	3652565	3736201	5143	+	*	0.7417	0.7474	0	0	0	0	0.1	0.34	0.18	0.24	0.06	0	0	0	0	0	0	2.34	0	0.14	0	0
cis_mRNA_dw20k	2316	NA	NONHSAT000542.2	NM_001204187.1	chr1	3738516	3740188	1493	-	chr1	3652565	3736201	4900	+	*	0.8018	0.7184	0	0.18	0	0.17	0	1.92	0.09	0.45	0	0.05	0	0	0	0	0	0.06	0	0.06	0	0
cis_mRNA_dw20k	2316	NA	NONHSAT000542.2	NM_005427.3	chr1	3738516	3740188	1493	-	chr1	3652565	3736201	5143	+	*	0.9822	0.7229	0	0.18	0	0.17	0	1.92	0.09	0.45	0	0.05	0	0	0	0	0	2.34	0	0.14	0	0
cis_mRNA_dw20k	2407	NA	NONHSAT000543.2	NM_001204187.1	chr1	3738607	3740216	1506	-	chr1	3652565	3736201	4900	+	*	0.8746	0.7184	0	0.14	0.23	0	0	0.61	0	0.4	0.02	0.2	0	0	0	0	0	0.06	0	0.06	0	0
cis_mRNA_dw20k	2407	NA	NONHSAT000543.2	NM_005427.3	chr1	3738607	3740216	1506	-	chr1	3652565	3736201	5143	+	*	0.7886	0.7229	0	0.14	0.23	0	0	0.61	0	0.4	0.02	0.2	0	0	0	0	0	2.34	0	0.14	0	0
cis_mRNA_dw20k	6126	NA	NONHSAT000545.2	NM_001204187.1	chr1	3742326	3747350	2220	-	chr1	3652565	3736201	4900	+	*	0.9924	0.9938	0	0	0	0	0	0.12	0	0.15	0	0	0	0	0	0	0	0.06	0	0.06	0	0
cis_mRNA_dw20k	6126	NA	NONHSAT000545.2	NM_005427.3	chr1	3742326	3747350	2220	-	chr1	3652565	3736201	5143	+	*	0.6178	0.9753	0	0	0	0	0	0.12	0	0.15	0	0	0	0	0	0	0	2.34	0	0.14	0	0
cis_mRNA_dw20k	3708	NA	NONHSAT000590.2	NM_018836.3	chr1	4787498	4792122	4625	+	chr1	4655045	4783791	2923	+	*	0.8846	0.75	0.12	0	0.01	0	0	0	0	0	0	0	0.25	0	0.14	0.01	0.06	0	0	0	0	0.01
cis_mRNA_up10k	160	NA	NONHSAT001081.2	NM_001042704.1	chr1	16016947	16021832	2762	+	chr1	16021991	16034050	2533	+	*	0.9971	0.7412	0.02	0	0.07	0	0.07	2.7	0.04	0.15	0.13	0	0	0	0.02	0.02	0	0.42	0	0.04	0.03	0
tran	195605	NA	NONHSAT001139.2	XM_017003079.1	chr1	16535760	16538174	2415	+	chr1	16733778	16736188	2411	-	-1255.92	0.9346	0.7764	0.02	0.01	0	0.01	0.04	0.24	0.05	0.04	0.02	0	0	0	0.02	0.01	0.03	0.17	0.08	0.04	0.05	0
cis_mRNA_overlap	0	Lnc-Overlap-mRNA	NONHSAT001145.2	MTCONS_00017355	chr1	16594544	16613516	652	-	chr1	16562010	16613605	8322	-	*	0.8423	0.6687	0.79	0.67	1.08	0.9	2.16	4.24	1.04	3.6	0.45	0.54	1.48	0.39	2.21	1.19	2.21	6.31	2.89	3.81	0.6	2.94
cis_mRNA_overlap	0	Lnc-Overlap-mRNA	NONHSAT001145.2	MTCONS_00017364	chr1	16594544	16613516	652	-	chr1	16577971	16613605	3406	-	-467.88	0.951	0.64	0.79	0.67	1.08	0.9	2.16	4.24	1.04	3.6	0.45	0.54	0.01	0.12	0	0	0.26	0.82	0	0.98	0	0
cis_mRNA_overlap	0	Lnc-Overlap-mRNA	NONHSAT001145.2	MTCONS_00017365	chr1	16594544	16613516	652	-	chr1	16577971	16613605	3406	-	-467.88	0.951	0.64	0.79	0.67	1.08	0.9	2.16	4.24	1.04	3.6	0.45	0.54	0.01	0.12	0	0	0.26	0.82	0	0.98	0	0
tran	4826616	NA	NONHSAT001145.2	XM_011542276.1	chr1	16594544	16613516	652	-	chr1	21440131	21484900	4385	+	-450.15	0.8508	0.8254	0.79	0.67	1.08	0.9	2.16	4.24	1.04	3.6	0.45	0.54	0	0	0.13	0	0.14	0.25	0.19	0.38	0	0.03
cis_mRNA_overlap	0	Lnc-Overlap-mRNA	NONHSAT001188.2	MTCONS_00017397	chr1	16684598	16686800	1861	-	chr1	16683139	16697270	4115	-	-725.29	-0.7514	-0.7178	0.54	0.72	0	0.36	0.58	0.97	0	1.17	0.59	0	0.31	0.4	0.71	1.12	0.45	0.21	1.03	0.43	0.28	1.11
cis_mRNA_overlap	0	Lnc-Overlap-mRNA	NONHSAT001190.2	MTCONS_00017397	chr1	16685505	16688208	1787	-	chr1	16683139	16697270	4115	-	-913.69	0.8547	0.8667	0.07	0.28	0.74	0.53	0.39	0.2	0.67	0.21	0.06	1.06	0.31	0.4	0.71	1.12	0.45	0.21	1.03	0.43	0.28	1.11
cis_mRNA_overlap	0	Lnc-CompleteIn-mRNAExon	NONHSAT001301.2	MTCONS_00002357	chr1	19331596	19334437	2460	+	chr1	19312246	19334437	6640	+	-1866.82	0.9612	0.6984	0.12	0.19	0.09	0.06	0.1	0.59	0.19	0.71	0.07	0.23	0	0	0	0	0	0.14	0	0.14	0	0
cis_mRNA_overlap	0	Lnc-Overlap-mRNA	NONHSAT001301.2	XM_006710710.2	chr1	19331596	19334437	2460	+	chr1	19312322	19332611	5089	+	-1862.5	0.7149	0.8279	0.12	0.19	0.09	0.06	0.1	0.59	0.19	0.71	0.07	0.23	0	0.02	0.04	0	0	0.9	0.17	0.21	0	0.12
cis_mRNA_overlap	0	Lnc-Overlap-mRNA	NONHSAT001301.2	XM_011541634.2	chr1	19331596	19334437	2460	+	chr1	19312294	19332611	5963	+	-1855.57	0.7928	0.7356	0.12	0.19	0.09	0.06	0.1	0.59	0.19	0.71	0.07	0.23	0.3	0.33	0.45	0.17	0.26	0.41	0.5	1.01	0.2	0.34
cis_mRNA_dw20k	2520	NA	NONHSAT001345.2	XM_017001270.1	chr1	20157692	20160566	2493	+	chr1	20163085	20175953	1298	-	*	0.6228	0.6833	0.43	0.2	0.22	0.08	0.62	0.6	0.56	2.09	0.24	0.38	0	0	0	0	0.07	0	0	0.05	0	0
cis_mRNA_dw20k	19653	NA	NONHSAT001388.2	MTCONS_00017707	chr1	20775656	20786640	991	-	chr1	20806292	21071297	6114	-	*	0.9114	0.6505	0.33	0.36	0.69	0.43	1.2	2.61	0.35	2.15	0.82	0.55	0.6	0.36	0.72	0.27	0.72	2.11	0.61	2.19	0.53	1.09
cis_mRNA_dw20k	19840	NA	NONHSAT001388.2	XM_011542375.2	chr1	20775656	20786640	991	-	chr1	20806479	21177320	8228	-	*	0.8488	0.6606	0.33	0.36	0.69	0.43	1.2	2.61	0.35	2.15	0.82	0.55	0.35	0.15	1.18	0.19	0.94	1.48	0.5	1.55	0.22	0.46
cis_mRNA_dw20k	19840	NA	NONHSAT001388.2	XM_017002703.1	chr1	20775656	20786640	991	-	chr1	20806479	21002741	5744	-	*	0.7487	0.6364	0.33	0.36	0.69	0.43	1.2	2.61	0.35	2.15	0.82	0.55	1.34	1.1	1.76	2.17	3.7	3.86	3.54	5.22	1.85	0.93
cis_mRNA_overlap	0	Lnc-Overlap-mRNA	NONHSAT001388.2	NM_016287.3	chr1	20775656	20786640	991	-	chr1	20742678	20786688	3921	-	*	0.83	0.697	0.33	0.36	0.69	0.43	1.2	2.61	0.35	2.15	0.82	0.55	3.95	4.23	7.01	2	8.29	25.89	9.46	11.13	10.59	9.34
cis_mRNA_overlap	0	Lnc-Overlap-mRNA	NONHSAT001388.2	XM_005245877.4	chr1	20775656	20786640	991	-	chr1	20742677	20786661	4358	-	-552.2	0.9291	0.6013	0.33	0.36	0.69	0.43	1.2	2.61	0.35	2.15	0.82	0.55	0	0	0	0.11	0.31	1.27	0.25	0.71	0	0
cis_mRNA_overlap	0	Lnc-CompleteIn-mRNAIntron	NONHSAT001470.2	NM_044472.2	chr1	22059197	22064199	692	+	chr1	22052627	22090803	1513	+	*	0.8133	0.7669	0.08	0	0	0	0.72	0.47	0.34	1	0.12	0.44	0.8	0.47	0.87	0.46	1.37	1.58	1.26	1.51	0.59	0.78
cis_mRNA_overlap	0	Lnc-Overlap-mRNA	NONHSAT001511.2	NM_001102397.2	chr1	23281333	23309635	14567	-	chr1	23304688	23344364	7665	-	*	0.8373	0.7317	0.25	0.21	0.59	0.18	0.66	2.04	0.38	1.2	0.21	0.65	0.11	0.19	0.07	0	0.31	1.23	0	1.37	0.29	0.83
cis_mRNA_overlap	0	Lnc-Overlap-mRNA	NONHSAT001511.2	NM_001102399.2	chr1	23281333	23309635	14567	-	chr1	23304688	23344364	7674	-	*	0.6884	0.6463	0.25	0.21	0.59	0.18	0.66	2.04	0.38	1.2	0.21	0.65	0.75	0.16	0.13	0	0.46	0.87	0	0.58	0.18	0.45
cis_mRNA_dw20k	17274	NA	NONHSAT001512.2	NM_001297622.1	chr1	23281281	23287415	5254	-	chr1	23304688	23344364	7551	-	*	0.9836	0.7531	0.08	0.22	0.38	0.25	0.12	1.82	0.13	0.57	0.28	0.17	0	0	0	0	0	1.91	0	0.39	0.25	0
cis_mRNA_dw20k	1698	NA	NONHSAT001652.2	NM_001251979.1	chr1	24538717	24539245	529	+	chr1	24502351	24537020	2641	+	*	0.9692	0.9636	2.13	2.97	1.27	0.59	3	5.2	0.82	1.87	1	0.48	1.56	2.63	0.87	0.39	1.47	4.41	0.52	1.33	0.64	0
cis_mRNA_dw20k	1698	NA	NONHSAT001652.2	NM_013441.3	chr1	24538717	24539245	529	+	chr1	24502897	24537020	2782	+	*	0.7414	0.677	2.13	2.97	1.27	0.59	3	5.2	0.82	1.87	1	0.48	0	0.95	0.19	0.25	0.95	0.75	0	0.54	0.2	0
cis_mRNA_up10k	4738	NA	NONHSAT001791.2	NM_022778.4	chr1	26226987	26229416	2192	+	chr1	26234153	26278810	3986	+	*	0.8653	0.8079	0.14	0.56	0.59	0.23	0.04	1.88	0.2	1.06	0.54	0.54	0.51	0.55	0.98	0.18	0.41	2.87	0.37	3.1	0.41	0.53
cis_mRNA_up10k	8601	NA	NONHSAT001955.2	NM_001269.4	chr1	28506351	28509633	2614	+	chr1	28518233	28539196	2540	+	*	0.7652	0.8424	0.99	1.21	1.08	0.64	2.93	2.42	2.06	7.02	0.27	0.75	1.59	3.49	1.35	1.69	4.4	7.9	1.96	7.26	0.92	1.85
cis_mRNA_dw20k	18256	NA	NONHSAT002201.2	XM_011541309.2	chr1	32351883	32361269	9387	+	chr1	32292103	32333628	2481	+	*	0.8776	0.7576	0.13	0.22	0.17	0.07	0.54	1.19	0.18	0.46	0.24	0.21	0.86	0.98	1.57	0.99	1.77	2.45	1.25	1.94	1.52	1.39
cis_mRNA_dw20k	18261	NA	NONHSAT002201.2	NM_004964.2	chr1	32351883	32361269	9387	+	chr1	32292107	32333623	2091	+	*	0.9342	0.8182	0.13	0.22	0.17	0.07	0.54	1.19	0.18	0.46	0.24	0.21	14.84	13.67	9.96	10.9	25.38	31.49	13.8	16.85	15.61	11.98
cis_mRNA_overlap	0	Lnc-Overlap-mRNA	NONHSAT002346.2	MTCONS_00018897	chr1	35176381	35180482	2588	-	chr1	35176380	35192092	1945	-	*	0.6693	0.6833	0	0	0	0	0	0.06	0	0	0.09	0	3.05	1.45	2.19	2.5	2.64	5.51	1.96	3.81	3.83	2.95
cis_mRNA_up10k	234	NA	NONHSAT002644.2	XM_017002102.1	chr1	40491043	40508682	2740	-	chr1	40508915	40516046	2307	+	*	0.8809	0.7455	0.09	0.08	0.2	0.12	0.43	1.13	0.17	0.66	0.07	0.32	0.08	0.09	0.17	0.04	0.23	0.8	0.39	0.32	0.12	0.13
cis_mRNA_up10k	808	NA	NONHSAT002775.2	XM_005270875.4	chr1	43120148	43146287	1138	+	chr1	43147094	43156396	1394	+	*	0.9743	0.6063	0	0	0	0	0	0.44	0	0	0.04	0	0	0.02	0	0.02	0.07	0.32	0	0.03	0.03	0
cis_mRNA_up10k	208	NA	NONHSAT002827.2	NM_014652.3	chr1	43937632	43946599	8328	-	chr1	43946806	43968022	4027	+	*	0.8305	0.7256	0.04	0.05	0.11	0.04	0.24	0.22	0.1	0.37	0.07	0.05	3	3.77	2.92	2.02	5.28	12.68	3.65	11.45	4.18	3.02
cis_mRNA_dw20k	17699	NA	NONHSAT003082.2	NM_012186.2	chr1	47435750	47437695	1946	-	chr1	47416072	47418052	1981	+	*	0.799	0.6742	0.04	0.1	0.06	0.02	0.12	0.28	0	0.16	0.18	0.07	0	0.01	0	0	0	0.02	0	0	0.01	0
cis_mRNA_dw20k	2925	NA	NONHSAT003175.2	NM_078626.2	chr1	50977561	51013502	4535	+	chr1	50969970	50974637	1273	+	*	0.9939	0.6342	0.25	0.34	0.3	0.23	0.29	1.93	0.15	0.32	0.23	0.32	1.37	1.36	0.82	1.05	0.71	10.64	0.78	1	0.46	1.39
cis_mRNA_dw20k	2928	NA	NONHSAT003175.2	NM_001262.2	chr1	50977561	51013502	4535	+	chr1	50968695	50974634	2087	+	*	0.9655	0.6024	0.25	0.34	0.3	0.23	0.29	1.93	0.15	0.32	0.23	0.32	0.27	0.57	0.14	0.19	1.02	7.03	0.12	2.12	0.27	0.18
cis_mRNA_dw20k	2635	NA	NONHSAT003300.2	NM_002370.3	chr1	53220663	53224258	3596	+	chr1	53226892	53238610	756	-	*	0.8323	0.7349	0.02	0.01	0	0	0	0.06	0.01	0.08	0.01	0	8.9	9.7	6.95	6.37	10.14	29.7	8.43	18.52	10.8	6.71
cis_mRNA_up10k	25	NA	NONHSAT003300.2	NM_017887.2	chr1	53220663	53224258	3596	+	chr1	53214099	53220639	1107	-	*	0.6099	0.6589	0.02	0.01	0	0	0	0.06	0.01	0.08	0.01	0	13.79	15.97	10.22	9.47	11.47	25.07	10.17	13.96	15.13	11.98
cis_mRNA_overlap	0	Lnc-AntiOverlap-mRNA	NONHSAT003464.2	NM_001278544.1	chr1	56963886	56996757	610	+	chr1	56929210	56966140	2291	-	*	0.6672	0.6485	0.32	0.18	0.17	0.59	0.14	0.63	0.43	0	0.1	1.35	18.88	9.44	21.93	27.18	4.6	4.86	26.61	1.06	10.97	33.38
cis_mRNA_overlap	0	Lnc-CompleteIn-mRNAExon	NONHSAT003731.2	MTCONS_00005946	chr1	65229628	65232136	2509	+	chr1	65148167	65232145	6878	+	-1144.38	-0.6232	-0.6149	0	0	0.06	0	0	0	0	0	0	0.07	0.09	0.22	0	0.15	0.15	0.12	0	0.21	0.31	0
cis_mRNA_up10k	190	NA	NONHSAT003810.2	XM_017001809.1	chr1	67832303	68202987	2064	+	chr1	67701538	67832114	4504	-	*	0.6876	0.6786	0	0	0.13	0	0.02	0	0	0	0	0.14	1.92	1.45	2.98	1.82	2.11	1.17	3.07	0.61	1.99	3.34
cis_mRNA_overlap	0	Lnc-Overlap-mRNA	NONHSAT004060.2	XM_011542392.2	chr1	77944917	77947669	1866	-	chr1	77944055	77979110	3727	-	-718.29	0.6101	0.6096	0.14	0.26	0.07	0.33	0.13	0.33	0.1	0.87	0.26	0.14	0	0.16	0	0	0	0.06	0	0.12	0	0
cis_mRNA_overlap	0	Lnc-CompleteIn-mRNAIntron	NONHSAT004134.2	MTCONS_00006679	chr1	81721693	81723068	1065	+	chr1	81444815	81992738	6339	+	*	0.7543	0.931	0.09	0	0.11	0.04	0	0	0.46	0	0	0.07	1.01	0	0.11	0.08	0	0	0.98	0	0	0.15
cis_mRNA_overlap	0	Lnc-CompleteIn-mRNAIntron	NONHSAT004134.2	NM_001297704.1	chr1	81721693	81723068	1065	+	chr1	81699770	81992738	5986	+	*	0.8341	0.8511	0.09	0	0.11	0.04	0	0	0.46	0	0	0.07	0.33	0	0.28	0	0	0	0.45	0	0	0
cis_mRNA_overlap	0	Lnc-CompleteIn-mRNAIntron	NONHSAT004134.2	XM_017000782.1	chr1	81721693	81723068	1065	+	chr1	81306155	81992251	6307	+	*	0.8253	0.8521	0.09	0	0.11	0.04	0	0	0.46	0	0	0.07	0.36	0	0.27	0.4	0.06	0.03	0.6	0	0.03	0.13
tran	NA	NA	NONHSAT004449.2	MTCONS_00124777	chr1	92125301	92126462	1162	+	chr17	68512379	68533431	4303	+	-602.63	0.8277	0.6854	0.08	0.16	0.1	0.04	0.47	0.44	0.05	0.17	0.1	0.29	0	0	0	0	0.07	0.13	0	0	0	0
cis_mRNA_overlap	0	Lnc-AntiOverlap-mRNA	NONHSAT004491.2	NM_206886.4	chr1	93262186	93345831	770	-	chr1	93180716	93278730	4322	+	*	0.6688	0.6479	0	0.68	0	0	0.04	0.23	0	0	0.3	0.1	0.23	0.44	0	0.31	0	0.53	0	0.11	0.57	0.14
cis_mRNA_overlap	0	Lnc-AntiOverlap-mRNA	NONHSAT004498.2	NM_206886.4	chr1	93264647	93324691	448	-	chr1	93180716	93278730	4322	+	*	0.7245	0.7327	0	0.31	0	0	0	0.09	0	0	0.52	0.13	0.23	0.44	0	0.31	0	0.53	0	0.11	0.57	0.14
cis_mRNA_up10k	6548	NA	NONHSAT004509.2	NM_001938.2	chr1	93305111	93339374	600	-	chr1	93345921	93362592	3209	+	*	0.8681	0.7939	0.11	0.06	0.17	0	0.38	0.54	0.07	0.57	0.14	0.08	5.8	5.23	4.92	4.38	6.09	16.82	4.76	12.62	5.34	6.05
cis_mRNA_up10k	2	NA	NONHSAT004520.2	NM_001938.2	chr1	93327023	93345920	12608	-	chr1	93345921	93362592	3209	+	*	0.9055	0.8788	0.39	0.59	0.66	0.28	1.28	2.44	0.35	1.25	0.64	0.81	5.8	5.23	4.92	4.38	6.09	16.82	4.76	12.62	5.34	6.05
cis_mRNA_dw20k	14591	NA	NONHSAT004549.2	NM_014597.4	chr1	93846762	93854868	7565	+	chr1	93869458	93879206	2722	-	*	0.9352	0.6338	0	0	0	0	0	0.05	0	0.06	0	0.02	8.99	9.31	6.56	7.15	8.23	14.22	8.57	15.26	8.16	8.51
cis_mRNA_overlap	0	Lnc-AntiOverlap-mRNA	NONHSAT004770.2	XM_017000872.1	chr1	99968383	99969901	692	-	chr1	99969367	100026892	6053	+	-1207.7	0.7906	0.7683	0	0.63	0.42	0.23	0.51	1.02	0	0	0.09	0	0	0.52	0.43	0	0.62	0.54	0.1	0.15	0.27	0.24
cis_mRNA_up10k	82	NA	NONHSAT004818.2	XM_005270939.4	chr1	101025853	101087263	2021	+	chr1	100989623	101025772	1598	-	*	-0.6251	-0.6924	0	0.12	0	0	0	0.14	0	0	0.08	0	0.08	0	0.12	0.36	0.32	0	0.28	0.41	0	0
cis_mRNA_dw20k	635	NA	NONHSAT005111.2	NM_022768.4	chr1	110347315	110356274	972	+	chr1	110339323	110346681	3431	+	*	0.6015	0.6485	0.28	0.12	0.09	0.1	1.02	3.03	0.29	1.25	0.74	0.64	1.59	0.74	1.54	0.78	2.52	2.55	1.52	3.98	1.28	1.2
cis_mRNA_up10k	109	NA	NONHSAT005301.2	NM_003051.3	chr1	112956461	112975430	8757	+	chr1	112911847	112956353	3910	-	*	0.7909	0.8004	0.06	0.07	0	0.03	0	0.16	0.11	0.23	0	0	13.14	18.05	6.17	11.96	4.18	13.18	6.87	55.51	5.48	10.33
cis_mRNA_overlap	0	Lnc-Overlap-mRNA	NONHSAT005553.2	MTCONS_00008838	chr1	119328175	119331048	869	+	chr1	119327414	119394130	2655	+	*	0.7906	0.7474	0.04	0.44	0	0.02	0	0.33	0	0	0.5	0	0	0.03	0	0	0	0	0	0	0.09	0
cis_mRNA_dw20k	12346	NA	NONHSAT005569.2	XM_011542416.2	chr1	119569032	119607072	711	-	chr1	119619417	119630715	8045	-	*	0.9778	0.6687	0.04	0.11	0.55	0.07	0.3	0.84	0.09	2.2	0.22	0.18	0.11	0.13	0.32	0.12	0.12	0.59	0.23	1.27	0.07	0.25
cis_mRNA_up10k	626	NA	NONHSAT005590.2	NM_001287385.1	chr1	143972631	143975153	746	+	chr1	143955364	143972006	2338	-	*	0.7525	0.8155	0.56	0.73	0.48	0.83	2.77	3.64	0.58	2.52	0.91	0.18	0.02	0	0	0	0.18	1.75	0.02	0.1	0.04	0
tran	22583432	NA	NONHSAT005590.2	NM_001271872.1	chr1	143972631	143975153	746	+	chr1	121185062	121389200	3327	+	-494.9	0.7649	0.7939	0.56	0.73	0.48	0.83	2.77	3.64	0.58	2.52	0.91	0.18	0.58	0.48	0.51	0.74	2.07	1.51	0.71	3.07	0.99	0.7
tran	62228312	NA	NONHSAT005590.2	MTCONS_00013299	chr1	143972631	143975153	746	+	chr1	206203464	206456161	3668	+	-506.3	0.6021	0.6271	0.56	0.73	0.48	0.83	2.77	3.64	0.58	2.52	0.91	0.18	0.2	0	0	0.16	0.38	0.21	0	0.04	0	0
tran	NA	NA	NONHSAT005651.2	NM_001098805.1	chr4_GL000008v2_random	162219	194537	2393	-	chr9	64369563	64412691	3517	+	-768.1	0.6225	0.7324	0.05	0.05	0.07	0.09	0.05	0.12	0.07	0.03	0.08	0.58	0.1	0.06	0.07	0.23	0.01	0.41	0.44	0.16	0.17	0.48
tran	NA	NA	NONHSAT005651.2	XM_005272532.4	chr4_GL000008v2_random	162219	194537	2393	-	chr9	67859378	67901821	2872	+	-758.86	0.8951	0.7099	0.05	0.05	0.07	0.09	0.05	0.12	0.07	0.03	0.08	0.58	0.3	0	0.68	0.3	0.27	0.36	0.56	0.04	0.39	1.47
tran	NA	NA	NONHSAT005681.2	MTCONS_00317807	chr1_KI270706v1_random	76128	78125	661	-	chrUn_KI270751v1	44903	55704	2126	+	-251.11	0.9974	0.9179	0.29	2.35	0.18	0.22	0.05	0.17	0	0	0.12	0.06	0.91	9.55	0.57	0.31	0.22	0.53	0.21	0	0.28	0.08
cis_mRNA_up10k	3739	NA	NONHSAT005708.2	MTCONS_00096484	chr14_GL000009v2_random	18892	33921	776	+	chr14_GL000009v2_random	37659	56712	1549	+	*	0.7779	0.7771	0.1	0.46	0.05	0	0.05	0.61	0.14	0	0.35	0.32	0	0.35	0.1	0.09	0	0.18	0.1	0	0.23	0.26
cis_mRNA_up10k	3739	NA	NONHSAT005708.2	XM_011544006.2	chr14_GL000009v2_random	18892	33921	776	+	chr14_GL000009v2_random	37659	49824	619	+	*	0.6481	0.6111	0.1	0.46	0.05	0	0.05	0.61	0.14	0	0.35	0.32	0.14	1.25	0.33	0.15	0	0.3	0	0	0.95	0.91
cis_mRNA_overlap	0	Lnc-Overlap-mRNA	NONHSAT005720.2	MTCONS_00096484	chr14_GL000009v2_random	49634	51628	661	+	chr14_GL000009v2_random	37659	56712	1549	+	-227.46	0.7765	0.7493	0	1.34	0.07	0	0.01	0	0.25	0	0.24	0.33	0	0.35	0.1	0.09	0	0.18	0.1	0	0.23	0.26
cis_mRNA_dw20k	1455	NA	NONHSAT005721.2	XM_011544006.2	chr14_GL000009v2_random	51278	61599	1887	+	chr14_GL000009v2_random	37659	49824	619	+	*	0.809	0.9633	0.02	1.52	0.2	0.1	0.01	0.18	0.08	0	0.32	0.31	0.14	1.25	0.33	0.15	0	0.3	0	0	0.95	0.91
cis_mRNA_overlap	0	Lnc-Overlap-mRNA	NONHSAT005721.2	MTCONS_00096484	chr14_GL000009v2_random	51278	61599	1887	+	chr14_GL000009v2_random	37659	56712	1549	+	*	0.8036	0.9355	0.02	1.52	0.2	0.1	0.01	0.18	0.08	0	0.32	0.31	0	0.35	0.1	0.09	0	0.18	0.1	0	0.23	0.26
tran	NA	NA	NONHSAT005721.2	NM_001102575.1	chr14_GL000009v2_random	51278	61599	1887	+	chr5	54517763	54546586	5219	+	-942.07	-0.6054	-0.7697	0.02	1.52	0.2	0.1	0.01	0.18	0.08	0	0.32	0.31	7.2	3.7	6	4.44	9.2	8.71	8.53	8.76	3.82	7.38
cis_mRNA_dw20k	6917	NA	NONHSAT006003.2	XM_017000801.1	chr1	147173314	147177047	448	+	chr1	147183963	147225566	4677	-	*	0.6827	0.6693	0.24	0	0	0.18	0.77	3.94	0	0.38	0.19	0	0	0	0	0	0.03	0.24	0	0	0.23	0
cis_mRNA_overlap	0	Lnc-Overlap-mRNA	NONHSAT006003.2	MTCONS_00009242	chr1	147173314	147177047	448	+	chr1	147172779	147184312	7363	+	-215.39	0.9788	0.7683	0.24	0	0	0.18	0.77	3.94	0	0.38	0.19	0	0.51	0.68	0.44	0.26	1.73	4.36	0.26	0.74	0.85	0.29
cis_mRNA_up10k	726	NA	NONHSAT006003.2	NM_005399.4	chr1	147173314	147177047	448	+	chr1	147155106	147172589	5462	-	*	0.6598	0.6816	0.24	0	0	0.18	0.77	3.94	0	0.38	0.19	0	7.25	12.09	11.34	10.29	15.36	22.63	3.08	15.69	18.94	3.44
tran	NA	NA	NONHSAT006205.2	MTCONS_00238364	chr1	149606196	149606618	423	+	chr5	50665899	50846522	7834	+	-268.96	0.7922	0.6068	3.65	0.94	1.91	2.09	1.61	0.3	1.59	0.2	0.54	0.57	0.11	0.03	0	0.03	0	0	0	0	0	0
tran	30669	NA	NONHSAT006253.2	NM_001024599.4	chr1	149843041	149843533	493	+	chr1	149811879	149812373	495	-	-264.87	0.6886	0.6933	0.12	0.12	0.07	0	1.29	1.67	0.38	2.22	0.12	0.22	20.96	21.83	13	8.61	53.43	159.84	12.41	45.38	6.71	15.16
tran	NA	NA	NONHSAT006253.2	NM_001312653.1	chr1	149843041	149843533	493	+	chr6	27146361	27146858	498	-	-273.66	0.6699	0.7424	0.12	0.12	0.07	0	1.29	1.67	0.38	2.22	0.12	0.22	39.27	31.1	22.26	13.53	49.85	306.16	20.17	98.69	24.67	27.8
tran	NA	NA	NONHSAT006253.2	NM_003519.3	chr1	149843041	149843533	493	+	chr6	27807479	27807931	453	-	-278.66	0.8944	0.6933	0.12	0.12	0.07	0	1.29	1.67	0.38	2.22	0.12	0.22	18.51	14.85	10.42	7.97	17.28	46.64	11.59	45.2	13.23	10.07
tran	NA	NA	NONHSAT006253.2	NM_003520.3	chr1	149843041	149843533	493	+	chr6	27838662	27839110	449	+	-291.09	0.6569	0.6688	0.12	0.12	0.07	0	1.29	1.67	0.38	2.22	0.12	0.22	5.33	6.02	2.42	1.84	7.83	70.38	0.86	20.57	3.79	3.85
tran	NA	NA	NONHSAT006253.2	NM_003521.2	chr1	149843041	149843533	493	+	chr6	27815044	27815489	446	+	-260.44	0.6038	0.6197	0.12	0.12	0.07	0	1.29	1.67	0.38	2.22	0.12	0.22	2.87	2.39	1.26	1.79	3.81	5.03	1.3	2.75	1.84	3.38
tran	NA	NA	NONHSAT006253.2	NM_003526.2	chr1	149843041	149843533	493	+	chr6	26123467	26123904	438	-	-269.42	0.9284	0.7178	0.12	0.12	0.07	0	1.29	1.67	0.38	2.22	0.12	0.22	85.93	63.03	75.11	58.76	94.95	160.03	66.06	166.8	78.32	67.33
tran	NA	NA	NONHSAT006253.2	NM_021063.3	chr1	149843041	149843533	493	+	chr6	26158121	26158607	487	+	-276.33	0.629	0.7669	0.12	0.12	0.07	0	1.29	1.67	0.38	2.22	0.12	0.22	27.07	25.6	11.73	12.42	38.33	314.56	14.48	79.24	18.91	18.64
tran	NA	NA	NONHSAT006253.2	XM_005249039.3	chr1	149843041	149843533	493	+	chr6	26157985	26159203	921	+	-326.96	0.748	0.6154	0.12	0.12	0.07	0	1.29	1.67	0.38	2.22	0.12	0.22	0.22	0.96	0.15	0.11	0.36	0.85	0.21	1.49	0.35	0.11
cis_mRNA_up10k	460	NA	NONHSAT006267.2	XM_017000164.1	chr1	150063353	150067284	3932	-	chr1	150067743	150099674	2433	+	*	0.6072	0.8085	0.12	0.08	0.08	0.05	0.28	0.75	0.13	0.71	0.03	0.46	0.47	0.25	0.85	0.2	1.43	0.97	0.67	0.98	0.09	0.8
cis_mRNA_overlap	0	Lnc-Overlap-mRNA	NONHSAT006270.2	XM_017000164.1	chr1	150098856	150145327	976	+	chr1	150067743	150099674	2433	+	*	-0.7291	-0.8599	0.14	0.69	0	0.2	0	0	0	0	0.39	0.02	0.47	0.25	0.85	0.2	1.43	0.97	0.67	0.98	0.09	0.8
cis_mRNA_overlap	0	Lnc-Overlap-mRNA	NONHSAT006282.2	NM_001077628.2	chr1	150265399	150269209	2021	-	chr1	150265399	150269209	1928	-	-1182.88	0.7117	0.6486	0.1	0.07	0	0	0	0.26	0	0.18	0	0	8.68	9.18	5.23	7.3	15.42	28.46	5.36	7.58	5.22	4.9
cis_mRNA_dw20k	7345	NA	NONHSAT006300.2	NM_025150.4	chr1	150514953	150522860	7908	+	chr1	150487364	150507609	2789	+	*	0.9439	0.7779	0.01	0.04	0.01	0.01	0.16	0.35	0.02	0.15	0.01	0.02	3.57	3.87	5.01	3.89	10.85	13.31	4.57	7.01	3.51	5.37
cis_mRNA_dw20k	1699	NA	NONHSAT006310.2	NM_021960.4	chr1	150564621	150572853	4247	-	chr1	150574551	150579738	4085	-	*	0.7584	0.7212	1.16	0.15	0.79	0.47	1.24	0.32	3.42	0.38	0.11	0.72	94.97	52.63	67.6	51.95	78.47	49.75	91.74	55.62	47.72	43.27
cis_mRNA_dw20k	1699	NA	NONHSAT006310.2	NM_182763.2	chr1	150564621	150572853	4247	-	chr1	150574551	150579738	3837	-	*	0.7189	0.8424	1.16	0.15	0.79	0.47	1.24	0.32	3.42	0.38	0.11	0.72	1.94	0.19	0.23	0.47	1.05	0.17	1.65	0.79	0	0.2
cis_mRNA_dw20k	11563	NA	NONHSAT006319.2	NM_207168.1	chr1	150611383	150615484	1992	-	chr1	150627046	150629622	756	-	*	0.9212	0.8024	0.1	0	0.21	0.07	0.29	0.8	0.21	0.36	0.24	0.13	1.58	1.1	2.82	1.68	2.36	4.61	2.04	3.29	1.65	2.35
cis_mRNA_dw20k	7795	NA	NONHSAT006319.2	NM_207044.1	chr1	150611383	150615484	1992	-	chr1	150623278	150629622	2866	-	*	0.9592	0.8875	0.1	0	0.21	0.07	0.29	0.8	0.21	0.36	0.24	0.13	6.72	5.5	5.66	5.42	10.06	19.3	6.36	11.08	8.03	7.71
cis_mRNA_dw20k	2053	NA	NONHSAT006342.2	MTCONS_00009688	chr1	150966796	150967631	647	-	chr1	150926246	150964744	4816	+	*	0.9218	0.9152	0.44	0.39	0.79	0.25	1.67	1.64	0.59	1.3	0.6	0.42	0.25	0.06	1.04	0.09	1.63	1.35	0.53	0.84	0.33	0.51
cis_mRNA_overlap	0	Lnc-Overlap-mRNA	NONHSAT006342.2	MTCONS_00024126	chr1	150966796	150967631	647	-	chr1	150965173	150975003	2477	-	-424.5	0.6623	0.614	0.44	0.39	0.79	0.25	1.67	1.64	0.59	1.3	0.6	0.42	1.17	1.17	1.78	1.01	2.78	1.1	0.62	1.94	1.33	0.76
cis_mRNA_dw20k	3	NA	NONHSAT006357.2	NM_006818.3	chr1	151068499	151070603	2105	-	chr1	151059675	151068497	2158	+	*	0.8455	0.677	0.05	0.12	0.1	0.05	0.23	0.63	0	0.15	0.01	0.05	0.36	0.21	0.64	0.55	4.89	5.19	0.36	0.45	0.18	0.36
cis_mRNA_overlap	0	Lnc-Overlap-mRNA	NONHSAT006530.2	XM_011509862.2	chr1	153627491	153634361	820	-	chr1	153618799	153634066	1104	-	-484.59	0.7124	0.6644	0	0.31	0	0	0.38	0.48	0	0	0.15	0.19	0	0.06	0	0	0	0.21	0	0	0	0
cis_mRNA_overlap	0	Lnc-Overlap-mRNA	NONHSAT006531.2	NM_001024210.1	chr1	153627508	153634361	887	-	chr1	153618799	153634092	897	-	-458.74	0.8013	0.7229	0.35	0	0.43	0.2	0	0.13	0.15	0.24	0	0	0.04	0	0.08	0	0	0	0	0	0	0
cis_mRNA_overlap	0	Lnc-AntiOverlap-mRNA	NONHSAT006615.2	XM_005245140.2	chr1	154402328	154406564	1756	-	chr1	154405234	154465838	2119	+	*	0.6997	0.6231	0.05	0.17	0.09	0.14	0.09	0.39	0.13	0.09	0.51	0.03	0.19	0.37	0	0.21	0.9	1.63	0	0.21	0.81	0
cis_mRNA_dw20k	18019	NA	NONHSAT006664.2	NM_001826.2	chr1	154997267	155000640	3374	-	chr1	154974642	154979249	816	+	*	0.7589	0.8037	0.05	0.08	0.07	0.06	0.25	0.41	0.03	0.36	0.05	0.05	17.28	25.16	13.72	13.14	28.06	78.37	12.33	21.08	17.75	13.62
cis_mRNA_dw20k	4157	NA	NONHSAT006664.2	NM_201398.2	chr1	154997267	155000640	3374	-	chr1	154983294	154993111	1795	+	*	0.9633	0.677	0.05	0.08	0.07	0.06	0.25	0.41	0.03	0.36	0.05	0.05	6.68	6.67	6.67	5.49	16.26	23.81	5.72	15.96	8.16	5.9
cis_mRNA_dw20k	8256	NA	NONHSAT006664.2	NM_001184892.1	chr1	154997267	155000640	3374	-	chr1	154983294	154989012	1876	+	*	0.9358	0.9019	0.05	0.08	0.07	0.06	0.25	0.41	0.03	0.36	0.05	0.05	0.77	0.87	0.92	0.51	0.93	1.9	0.48	1.68	0.68	0.67
cis_mRNA_up10k	7676	NA	NONHSAT006664.2	XM_011509598.2	chr1	154997267	155000640	3374	-	chr1	155008315	155018523	4376	+	*	0.962	0.8848	0.05	0.08	0.07	0.06	0.25	0.41	0.03	0.36	0.05	0.05	0	0.05	0	0	0.36	0.61	0	0.84	0	0
cis_mRNA_up10k	8027	NA	NONHSAT006664.2	XM_006711358.1	chr1	154997267	155000640	3374	-	chr1	155008666	155018523	3785	+	*	0.6911	0.7764	0.05	0.08	0.07	0.06	0.25	0.41	0.03	0.36	0.05	0.05	0.02	0.18	0.05	0	0.13	0.11	0	0.29	0	0.07
cis_mRNA_dw20k	13569	NA	NONHSAT006710.2	NM_006589.2	chr1	155231272	155233637	2366	-	chr1	155247205	155255483	3190	-	*	0.9286	0.8469	0.16	0.33	0.21	0.06	1.02	1.5	0.25	1.7	0.61	0.11	0	0	0.03	0	0.08	0.51	0	0.67	0.1	0
cis_mRNA_dw20k	17434	NA	NONHSAT006710.2	NM_002455.4	chr1	155231272	155233637	2366	-	chr1	155208699	155213839	1648	+	*	0.7485	0.9636	0.16	0.33	0.21	0.06	1.02	1.5	0.25	1.7	0.61	0.11	8.41	10.18	9.15	7.16	16.71	46.62	8.85	17.61	11.61	8.45
cis_mRNA_dw20k	17434	NA	NONHSAT006710.2	NM_198883.3	chr1	155231272	155233637	2366	-	chr1	155208699	155213839	1555	+	*	0.7432	0.7234	0.16	0.33	0.21	0.06	1.02	1.5	0.25	1.7	0.61	0.11	0.07	0.15	0	0.24	0.7	0.74	0.39	0.4	0.28	0.15
cis_mRNA_dw20k	812	NA	NONHSAT006710.2	MTCONS_00024711	chr1	155231272	155233637	2366	-	chr1	155234448	155244862	2722	-	*	0.7781	0.7455	0.16	0.33	0.21	0.06	1.02	1.5	0.25	1.7	0.61	0.11	0.63	0.64	0.28	0.26	3.13	5.43	0.49	1.84	1.01	1.06
cis_mRNA_dw20k	812	NA	NONHSAT006710.2	NM_000157.3	chr1	155231272	155233637	2366	-	chr1	155234448	155241278	2324	-	*	0.9499	0.8667	0.16	0.33	0.21	0.06	1.02	1.5	0.25	1.7	0.61	0.11	7.13	6.71	5.41	6.45	35.03	35.08	7.08	35.86	10.47	4.32
cis_mRNA_dw20k	812	NA	NONHSAT006710.2	NM_001005741.2	chr1	155231272	155233637	2366	-	chr1	155234448	155244862	2583	-	*	0.8308	0.7576	0.16	0.33	0.21	0.06	1.02	1.5	0.25	1.7	0.61	0.11	1.25	1.86	1.2	0.89	6.38	6.13	1.14	3.96	1.51	1.57
cis_mRNA_dw20k	812	NA	NONHSAT006710.2	NM_001005742.2	chr1	155231272	155233637	2366	-	chr1	155234448	155244862	2564	-	*	0.7374	0.697	0.16	0.33	0.21	0.06	1.02	1.5	0.25	1.7	0.61	0.11	0.14	0.34	0.36	0.27	1.05	1.01	0.11	0.73	1.09	0.33
cis_mRNA_dw20k	12849	NA	NONHSAT006729.2	MTCONS_00024769	chr1	155320831	155322413	1036	-	chr1	155335261	155562850	11536	-	*	0.8154	0.8896	0.07	0	0.05	0	0.17	0.97	0.15	0.44	0	0.12	0.76	0.45	0.96	0.55	2.62	3.61	1.78	2.53	1.56	2.35
cis_mRNA_dw20k	12851	NA	NONHSAT006729.2	XM_006711451.3	chr1	155320831	155322413	1036	-	chr1	155335263	155562794	11550	-	*	0.962	0.677	0.07	0	0.05	0	0.17	0.97	0.15	0.44	0	0.12	0	0.05	0.35	0.23	0.84	2.7	0	1.12	0	0.52
cis_mRNA_dw20k	166	NA	NONHSAT006729.2	NM_001135822.1	chr1	155320831	155322413	1036	-	chr1	155308748	155320666	1338	+	*	0.7764	0.6273	0.07	0	0.05	0	0.17	0.97	0.15	0.44	0	0.12	2.02	0	2.52	0	17.5	29.77	3.28	5.92	12.71	0
cis_mRNA_overlap	0	Lnc-AntiOverlap-mRNA	NONHSAT006729.2	XM_017000891.1	chr1	155320831	155322413	1036	-	chr1	155321375	155331114	4062	+	-999.36	0.7332	0.7473	0.07	0	0.05	0	0.17	0.97	0.15	0.44	0	0.12	0	0	0	0	0	0.06	0.03	0.1	0	0
cis_mRNA_up10k	1051	NA	NONHSAT006729.2	XM_006711257.1	chr1	155320831	155322413	1036	-	chr1	155323463	155331114	2160	+	*	0.918	0.8882	0.07	0	0.05	0	0.17	0.97	0.15	0.44	0	0.12	0.27	0.41	0	0	1.64	2.86	0.42	1.48	0	0.69
cis_mRNA_up10k	1525	NA	NONHSAT006729.2	NM_001278228.1	chr1	155320831	155322413	1036	-	chr1	155323937	155331118	2687	+	*	0.9314	0.6077	0.07	0	0.05	0	0.17	0.97	0.15	0.44	0	0.12	0.23	0.15	0	0	0.14	0.95	0	0.25	0	0.09
cis_mRNA_up10k	1525	NA	NONHSAT006729.2	NM_014328.4	chr1	155320831	155322413	1036	-	chr1	155323937	155331118	2550	+	*	0.9599	0.7811	0.07	0	0.05	0	0.17	0.97	0.15	0.44	0	0.12	0	0	0.14	0.12	0.35	1.31	0.14	0.37	0	0
cis_mRNA_overlap	0	Lnc-AntiOverlap-mRNA	NONHSAT006749.2	NM_001256532.1	chr1	155612424	155614929	1766	-	chr1	155610170	155614967	2483	+	-2632.02	0.8288	0.6657	0.07	0.03	0.14	0.09	0.17	0.55	0.14	0.15	0.33	0.08	0	0	0	0	0.09	0.71	0	0.22	0	0
cis_mRNA_overlap	0	Lnc-AntiOverlap-mRNA	NONHSAT006749.2	XM_011509697.1	chr1	155612424	155614929	1766	-	chr1	155610212	155614936	2450	+	-2634.7	0.8411	0.6247	0.07	0.03	0.14	0.09	0.17	0.55	0.14	0.15	0.33	0.08	0	0	0	0	0.08	0.29	0	0	0	0
cis_mRNA_overlap	0	Lnc-AntiOverlap-mRNA	NONHSAT006749.2	XM_017001608.1	chr1	155612424	155614929	1766	-	chr1	155610322	155614936	2441	+	-2632.13	0.6182	0.6609	0.07	0.03	0.14	0.09	0.17	0.55	0.14	0.15	0.33	0.08	0	0	0	0	0	0.49	0.48	0.27	0.1	0
cis_mRNA_overlap	0	Lnc-AntiOverlap-mRNA	NONHSAT006749.2	XM_017001613.1	chr1	155612424	155614929	1766	-	chr1	155610425	155614936	2321	+	-2631.43	0.9069	0.747	0.07	0.03	0.14	0.09	0.17	0.55	0.14	0.15	0.33	0.08	0.02	0.06	0.19	0	0.57	1.69	0	0.15	0.33	0.07
cis_mRNA_dw20k	10899	NA	NONHSAT006754.2	NM_001198900.1	chr1	155626756	155648544	1287	-	chr1	155659442	155688777	2697	-	*	0.7303	0.7012	1.44	2.51	0.68	0.73	3.1	10.39	0.89	11.12	1.45	1.06	0.22	0.28	0	0.21	0.23	0.21	0.15	0.8	0.08	0
cis_mRNA_dw20k	10899	NA	NONHSAT006754.2	NM_001198905.1	chr1	155626756	155648544	1287	-	chr1	155659442	155688777	2678	-	*	0.7787	0.6848	1.44	2.51	0.68	0.73	3.1	10.39	0.89	11.12	1.45	1.06	0.43	0.11	0.12	0	1.59	2	0.62	1.28	0.56	0.08
cis_mRNA_dw20k	10899	NA	NONHSAT006754.2	NM_018253.3	chr1	155626756	155648544	1287	-	chr1	155659442	155688777	2819	-	*	0.6998	0.768	1.44	2.51	0.68	0.73	3.1	10.39	0.89	11.12	1.45	1.06	0	0	0	0	0.16	0.29	0	0.06	0	0
cis_mRNA_dw20k	10899	NA	NONHSAT006754.2	NM_139119.2	chr1	155626756	155648544	1287	-	chr1	155659442	155688774	2735	-	*	0.852	0.7212	1.44	2.51	0.68	0.73	3.1	10.39	0.89	11.12	1.45	1.06	1.94	1.62	1.24	1.58	4.04	5.7	1.36	3.83	1.19	1.5
cis_mRNA_dw20k	11790	NA	NONHSAT006754.2	MTCONS_00010357	chr1	155626756	155648544	1287	-	chr1	155610170	155614967	2847	+	*	0.9014	0.7455	1.44	2.51	0.68	0.73	3.1	10.39	0.89	11.12	1.45	1.06	0.23	0.35	0.25	0.05	0.65	1.66	0.26	0.93	0.2	0.14
cis_mRNA_dw20k	11790	NA	NONHSAT006754.2	MTCONS_00010379	chr1	155626756	155648544	1287	-	chr1	155610238	155614967	3152	+	*	0.7665	0.6487	1.44	2.51	0.68	0.73	3.1	10.39	0.89	11.12	1.45	1.06	0	0	0	0	0	0.04	0	0.22	0.05	0
cis_mRNA_dw20k	11790	NA	NONHSAT006754.2	NM_001256532.1	chr1	155626756	155648544	1287	-	chr1	155610170	155614967	2483	+	*	0.8283	0.7979	1.44	2.51	0.68	0.73	3.1	10.39	0.89	11.12	1.45	1.06	0	0	0	0	0.09	0.71	0	0.22	0	0
cis_mRNA_dw20k	11821	NA	NONHSAT006754.2	XM_011509696.1	chr1	155626756	155648544	1287	-	chr1	155610212	155614936	2380	+	*	0.8581	0.8909	1.44	2.51	0.68	0.73	3.1	10.39	0.89	11.12	1.45	1.06	0.14	0.65	0	0.19	1.41	1.23	0.37	2.16	0.48	0.03
cis_mRNA_dw20k	11821	NA	NONHSAT006754.2	XM_011509703.1	chr1	155626756	155648544	1287	-	chr1	155610170	155614936	3055	+	*	0.9312	0.6606	1.44	2.51	0.68	0.73	3.1	10.39	0.89	11.12	1.45	1.06	0.09	0.61	0.55	0.23	1.26	1.76	0	2.75	0.16	0.22
cis_mRNA_dw20k	11821	NA	NONHSAT006754.2	XM_017001611.1	chr1	155626756	155648544	1287	-	chr1	155610170	155614936	2982	+	*	0.9729	0.6338	1.44	2.51	0.68	0.73	3.1	10.39	0.89	11.12	1.45	1.06	0.12	0	0	0	0	0.73	0	0.87	0	0
cis_mRNA_overlap	0	Lnc-Overlap-mRNA	NONHSAT006788.2	XM_005245590.3	chr1	155982379	155985449	1350	-	chr1	155946853	155983380	4126	-	*	0.8235	0.6482	0	0	0	0	0.07	0.12	0	0.17	0	0.03	0.28	0	0	0	0.72	0.24	0	1.44	0.22	0
cis_mRNA_overlap	0	Lnc-Overlap-mRNA	NONHSAT006788.2	XM_005245591.3	chr1	155982379	155985449	1350	-	chr1	155946853	155983600	4242	-	*	0.9651	0.9158	0	0	0	0	0.07	0.12	0	0.17	0	0.03	0	0.15	0	0	0.58	3.13	0	4.67	0.05	0.36
cis_mRNA_up10k	1498	NA	NONHSAT006788.2	XM_006711622.3	chr1	155982379	155985449	1350	-	chr1	155946854	155980882	5388	-	*	0.8304	0.8163	0	0	0	0	0.07	0.12	0	0.17	0	0.03	0	0	0.04	0.01	0.03	0.05	0	0.32	0	0.04
cis_mRNA_up10k	4205	NA	NONHSAT006788.2	NM_004723.3	chr1	155982379	155985449	1350	-	chr1	155946839	155978175	4107	-	*	0.6718	0.6148	0	0	0	0	0.07	0.12	0	0.17	0	0.03	0.2	0.61	0	0.36	0.73	2.13	0.24	0.77	0.2	0
cis_mRNA_dw20k	3008	NA	NONHSAT006847.2	XM_011509800.2	chr1	156388226	156395609	5586	+	chr1	156369204	156385219	1311	+	*	0.9916	0.8355	0	0	0	0	0	0.01	0	0.09	0.01	0	0.16	0	0	0	0	0.45	0	3.27	0.01	0
cis_mRNA_overlap	0	Lnc-Overlap-mRNA	NONHSAT006875.2	XM_017000064.1	chr1	156446412	156456554	611	-	chr1	156404256	156456632	1064	-	*	0.9609	0.6147	0	0	0	0	0	1.82	0	0.36	0.21	0	0	0.05	0	0	0	0.34	0	0	0.07	0
cis_mRNA_overlap	0	Lnc-Overlap-mRNA	NONHSAT006876.2	XM_017000064.1	chr1	156446469	156456599	446	-	chr1	156404256	156456632	1064	-	*	0.9959	0.8386	0	0.49	0	0.16	0	3.26	0	0.11	0.65	0.26	0	0.05	0	0	0	0.34	0	0	0.07	0
cis_mRNA_dw20k	209	NA	NONHSAT007100.2	NM_012394.3	chr1	161098361	161100348	1107	+	chr1	161100556	161118076	642	-	*	0.8684	0.7576	0.61	0.77	0.3	0.47	2.13	4.67	0.09	0.75	0.51	0.5	7.15	10.32	8.06	6.85	9.26	28.13	7.13	16.67	7.81	7.87
cis_mRNA_dw20k	11715	NA	NONHSAT007119.2	NM_001185093.1	chr1	161132908	161139823	2824	+	chr1	161118117	161121194	1750	+	*	-0.6393	-0.7744	0.03	0.03	0.01	0	0.1	0.17	0.08	0.05	0.02	0.01	0.36	0.21	0.52	0.34	0.25	0	0.29	0.16	0.3	0.89
cis_mRNA_dw20k	11715	NA	NONHSAT007119.2	NM_005600.2	chr1	161132908	161139823	2824	+	chr1	161118072	161121194	1518	+	*	0.8821	0.6829	0.03	0.03	0.01	0	0.1	0.17	0.08	0.05	0.02	0.01	9.76	10.56	9.45	8.91	12.71	22.69	9.98	9.95	10.54	10.01
cis_mRNA_overlap	0	Lnc-CompleteIn-mRNAIntron	NONHSAT007119.2	XM_017001450.1	chr1	161132908	161139823	2824	+	chr1	161132754	161158856	967	+	*	0.8807	0.811	0.03	0.03	0.01	0	0.1	0.17	0.08	0.05	0.02	0.01	14.2	15.53	11.52	10.61	16.3	27.19	12.78	16.6	12.26	13.12
cis_mRNA_up10k	221	NA	NONHSAT007119.2	NM_001039711.1	chr1	161132908	161139823	2824	+	chr1	161120977	161132688	2329	-	*	0.7933	0.8556	0.03	0.03	0.01	0	0.1	0.17	0.08	0.05	0.02	0.01	0.08	0.37	0	0	0.35	0.71	0.16	0.56	0	0
cis_mRNA_up10k	221	NA	NONHSAT007119.2	NM_032998.2	chr1	161132908	161139823	2824	+	chr1	161120977	161132688	2362	-	*	0.874	0.8073	0.03	0.03	0.01	0	0.1	0.17	0.08	0.05	0.02	0.01	1.62	1.45	1.91	1.27	5.98	5.59	3.04	4.14	1.21	1.45
cis_mRNA_up10k	443	NA	NONHSAT007119.2	NM_001039712.1	chr1	161132908	161139823	2824	+	chr1	161120977	161132466	2300	-	*	0.7978	0.6037	0.03	0.03	0.01	0	0.1	0.17	0.08	0.05	0.02	0.01	1.34	0.9	0.37	0.5	1.73	2.41	0.71	0.89	1.3	1.05
cis_mRNA_up10k	716	NA	NONHSAT007119.2	XM_017002802.1	chr1	161132908	161139823	2824	+	chr1	161121331	161132193	3058	-	*	0.8651	0.6342	0.03	0.03	0.01	0	0.1	0.17	0.08	0.05	0.02	0.01	0.57	0.36	0.41	0.18	0.56	1.43	0.51	0.5	0.17	0.53
cis_mRNA_dw20k	2747	NA	NONHSAT007128.2	XM_005245566.1	chr1	161166482	161168564	1024	+	chr1	161171310	161177495	2116	-	*	0.6068	0.6074	0	0.15	0.16	0.13	0.19	0.79	0	0.12	0.08	0	0.25	1.51	0.99	0.77	6.85	5.68	1.76	4.73	1.18	0.03
cis_mRNA_dw20k	2747	NA	NONHSAT007128.2	XM_011510093.1	chr1	161166482	161168564	1024	+	chr1	161171310	161177524	1925	-	*	0.8057	0.6565	0	0.15	0.16	0.13	0.19	0.79	0	0.12	0.08	0	1.24	1.09	1.03	1.13	2.25	2.94	0.1	1.86	0.94	0.41
cis_mRNA_dw20k	7627	NA	NONHSAT007128.2	XM_005245254.1	chr1	161166482	161168564	1024	+	chr1	161153792	161158856	983	+	*	0.9169	0.6014	0	0.15	0.16	0.13	0.19	0.79	0	0.12	0.08	0	0.23	0	0.53	0.24	0.64	1.77	0.28	0	0	0
cis_mRNA_overlap	0	Lnc-Overlap-mRNA	NONHSAT007128.2	MTCONS_00011000	chr1	161166482	161168564	1024	+	chr1	161166391	161171220	1877	+	*	0.6521	0.8012	0	0.15	0.16	0.13	0.19	0.79	0	0.12	0.08	0	0	0.35	0.21	0.13	0.41	0.92	0	1.08	0.11	0
cis_mRNA_overlap	0	Lnc-Overlap-mRNA	NONHSAT007128.2	XM_017001571.1	chr1	161166482	161168564	1024	+	chr1	161165824	161178277	1771	+	*	0.8378	0.6143	0	0.15	0.16	0.13	0.19	0.79	0	0.12	0.08	0	0	0	0.02	0.02	0	0.04	0	0	0	0
cis_mRNA_up10k	4015	NA	NONHSAT007230.2	XM_011509588.2	chr1	162607763	162628387	13895	+	chr1	162632401	162772009	3338	+	*	0.6317	0.75	0.35	0.12	1.52	0.25	0.31	0.47	1.87	0.19	0.12	1.06	0.18	0.04	0.43	0.14	0.17	0.14	0.19	0.13	0.06	0.11
cis_mRNA_up10k	4052	NA	NONHSAT007230.2	NM_001014796.1	chr1	162607763	162628387	13895	+	chr1	162632438	162780465	3252	+	*	0.8934	0.6984	0.35	0.12	1.52	0.25	0.31	0.47	1.87	0.19	0.12	1.06	0	0	0.14	0	0	0	0.14	0	0	0
cis_mRNA_dw20k	1647	NA	NONHSAT007235.2	NM_006182.2	chr1	162782111	162786572	4462	+	chr1	162632438	162780465	3172	+	*	0.892	0.8182	2.93	0.9	2.32	2.33	0.69	0.72	1.73	0.45	0.8	1.88	1.9	0.35	1.13	0.72	0.58	0.42	0.78	0	0.16	0.82
cis_mRNA_overlap	0	Lnc-Overlap-mRNA	NONHSAT007235.2	XM_006711344.3	chr1	162782111	162786572	4462	+	chr1	162631213	162783524	6272	+	-1922.3	0.948	0.9633	2.93	0.9	2.32	2.33	0.69	0.72	1.73	0.45	0.8	1.88	0.93	0.4	0.77	0.6	0	0	0.52	0	0.19	0.44
cis_mRNA_overlap	0	Lnc-Overlap-mRNA	NONHSAT007235.2	XM_011509586.2	chr1	162782111	162786572	4462	+	chr1	162631927	162783524	6204	+	-1904.19	0.6864	0.6159	2.93	0.9	2.32	2.33	0.69	0.72	1.73	0.45	0.8	1.88	0.85	0	1.37	0.85	0.76	0.36	0.74	0.48	0	0.73
cis_mRNA_up10k	4131	NA	NONHSAT007235.2	NM_001304513.1	chr1	162782111	162786572	4462	+	chr1	162790702	162798142	746	+	*	-0.683	-0.7091	2.93	0.9	2.32	2.33	0.69	0.72	1.73	0.45	0.8	1.88	0.27	0.31	0.53	0.63	1.58	2.81	0.93	1.41	2.32	0.25
cis_mRNA_up10k	143	NA	NONHSAT007259.2	NM_031423.3	chr1	163304206	163321791	1485	-	chr1	163321933	163355763	1843	+	*	0.9689	0.6741	0.2	0.33	0.21	0.27	0.21	1.3	0.09	0.21	0.34	0.41	0	0.17	0	0	0.28	2.31	0	0	0.07	0.13
cis_mRNA_overlap	0	Lnc-AntiCompleteIn-mRNAIntron	NONHSAT007349.2	NM_001017961.4	chr1	166081183	166087483	594	+	chr1	166069299	166166755	2235	-	*	0.7554	0.6527	0	0.13	0	0	0.8	0	0	0.02	0	0	0.11	0.18	0.17	0.08	0.41	0.23	0.2	0.3	0.17	0.08
cis_mRNA_overlap	0	Lnc-CompleteIn-mRNAIntron	NONHSAT007485.2	NM_001204514.1	chr1	170021458	170022249	792	-	chr1	169921329	170074738	3161	-	*	0.6361	0.6193	0	0.03	0.28	0	0.22	0.65	0.08	0.18	0.16	0.05	0.05	0	0.05	0	0.06	0.12	0.11	0.07	0.06	0.06
tran	NA	NA	NONHSAT007485.2	MTCONS_00104510	chr1	170021458	170022249	792	-	chr15	66314914	66386787	6926	-	-959.99	0.9017	0.6534	0	0.03	0.28	0	0.22	0.65	0.08	0.18	0.16	0.05	0.17	0.03	0.19	0.06	0.19	0.82	0.06	0.3	0.03	0.11
cis_mRNA_dw20k	7372	NA	NONHSAT007542.2	XM_005245018.2	chr1	171600882	171601812	931	+	chr1	171485506	171593511	10648	+	*	0.7355	0.6148	0.14	0.16	0.13	0.19	0.29	0.87	0.11	0.81	0.03	0.17	0.19	0.01	0.32	0	0.6	0.53	0	0.53	0	0
cis_mRNA_dw20k	5360	NA	NONHSAT007664.2	XM_006711427.3	chr1	173863901	173867989	1698	-	chr1	173824702	173858542	3150	+	*	0.6418	0.7878	0.55	0.58	0.52	0.51	1.43	2.01	0.25	6.96	0.9	0	0.07	0.07	0	0	0.28	0.74	0	0.5	0.15	0.13
cis_mRNA_dw20k	11361	NA	NONHSAT007680.2	XM_011509711.2	chr1	173863904	173864906	643	-	chr1	173824702	173852544	2581	+	*	0.8377	0.6848	0.54	1.76	0.76	0.52	3.27	8.39	0.9	7.64	0.86	0.17	0.08	0.03	0.11	0.1	0.16	0.68	0.13	0.29	0.23	0.04
cis_mRNA_dw20k	5361	NA	NONHSAT007680.2	NM_018122.4	chr1	173863904	173864906	643	-	chr1	173824659	173858544	3348	+	*	0.9057	0.8545	0.54	1.76	0.76	0.52	3.27	8.39	0.9	7.64	0.86	0.17	3.47	5	3.89	3.59	7.22	21.6	3.65	10.45	4.92	3.79
cis_mRNA_dw20k	5363	NA	NONHSAT007680.2	XM_006711427.3	chr1	173863904	173864906	643	-	chr1	173824702	173858542	3150	+	*	0.9505	0.6462	0.54	1.76	0.76	0.52	3.27	8.39	0.9	7.64	0.86	0.17	0.07	0.07	0	0	0.28	0.74	0	0.5	0.15	0.13
cis_mRNA_up10k	3392	NA	NONHSAT007680.2	XM_005245546.2	chr1	173863904	173864906	643	-	chr1	173868297	173891122	6841	+	*	0.8144	0.6606	0.54	1.76	0.76	0.52	3.27	8.39	0.9	7.64	0.86	0.17	1.88	2.28	1.59	0.81	4.18	7.59	1.76	3.18	1.75	2.61
cis_mRNA_dw20k	5411	NA	NONHSAT007682.2	NM_018122.4	chr1	173863954	173864905	424	-	chr1	173824659	173858544	3348	+	*	0.881	0.7842	0.08	0.73	0.09	0	0.63	2.48	0.1	2.39	0.02	0	3.47	5	3.89	3.59	7.22	21.6	3.65	10.45	4.92	3.79
cis_mRNA_up10k	3393	NA	NONHSAT007682.2	XM_005245546.2	chr1	173863954	173864905	424	-	chr1	173868297	173891122	6841	+	*	0.7771	0.6748	0.08	0.73	0.09	0	0.63	2.48	0.1	2.39	0.02	0	1.88	2.28	1.59	0.81	4.18	7.59	1.76	3.18	1.75	2.61
cis_mRNA_up10k	3476	NA	NONHSAT007682.2	XM_017002557.1	chr1	173863954	173864905	424	-	chr1	173868380	173891122	6661	+	*	0.9004	0.614	0.08	0.73	0.09	0	0.63	2.48	0.1	2.39	0.02	0	0.39	0.4	0.53	0.57	0.94	2.11	0.33	1.33	0	0.35
cis_mRNA_up10k	309	NA	NONHSAT007691.2	XM_005245546.2	chr1	173865168	173867989	800	-	chr1	173868297	173891122	6841	+	*	0.6162	0.6364	0.53	0.63	0.57	0.83	2.61	1.78	0.39	2.52	0.03	0.77	1.88	2.28	1.59	0.81	4.18	7.59	1.76	3.18	1.75	2.61
cis_mRNA_up10k	367	NA	NONHSAT007691.2	NM_032522.3	chr1	173865168	173867989	800	-	chr1	173868355	173873643	1373	+	*	0.6872	0.6228	0.53	0.63	0.57	0.83	2.61	1.78	0.39	2.52	0.03	0.77	0	0	0	0	0.3	0.13	0	0	0	0
cis_mRNA_up10k	392	NA	NONHSAT007691.2	XM_017002557.1	chr1	173865168	173867989	800	-	chr1	173868380	173891122	6661	+	*	0.7516	0.8667	0.53	0.63	0.57	0.83	2.61	1.78	0.39	2.52	0.03	0.77	0.39	0.4	0.53	0.57	0.94	2.11	0.33	1.33	0	0.35
cis_mRNA_dw20k	6708	NA	NONHSAT007693.2	XM_006711427.3	chr1	173865249	173867991	583	-	chr1	173824702	173858542	3150	+	*	0.7277	0.6204	0	0.56	0.05	0.27	0.57	1.01	0.2	2.19	0	0.4	0.07	0.07	0	0	0.28	0.74	0	0.5	0.15	0.13
cis_mRNA_up10k	390	NA	NONHSAT007693.2	XM_017002557.1	chr1	173865249	173867991	583	-	chr1	173868380	173891122	6661	+	*	0.689	0.766	0	0.56	0.05	0.27	0.57	1.01	0.2	2.19	0	0.4	0.39	0.4	0.53	0.57	0.94	2.11	0.33	1.33	0	0.35
cis_mRNA_up10k	392	NA	NONHSAT007698.2	XM_017002557.1	chr1	173865818	173867989	1062	-	chr1	173868380	173891122	6661	+	*	0.6905	0.697	1.56	2.15	1.59	1.07	4.73	4.29	2.93	8.53	0.54	1.05	0.39	0.4	0.53	0.57	0.94	2.11	0.33	1.33	0	0.35
cis_mRNA_dw20k	13324	NA	NONHSAT007699.2	XM_011509711.2	chr1	173865867	173867989	1191	-	chr1	173824702	173852544	2581	+	*	0.7996	0.7979	0	0	0	0	0	0.21	0	0.23	0.16	0	0.08	0.03	0.11	0.1	0.16	0.68	0.13	0.29	0.23	0.04
cis_mRNA_dw20k	7324	NA	NONHSAT007699.2	NM_018122.4	chr1	173865867	173867989	1191	-	chr1	173824659	173858544	3348	+	*	0.7351	0.6786	0	0	0	0	0	0.21	0	0.23	0.16	0	3.47	5	3.89	3.59	7.22	21.6	3.65	10.45	4.92	3.79
cis_mRNA_dw20k	7326	NA	NONHSAT007699.2	XM_006711427.3	chr1	173865867	173867989	1191	-	chr1	173824702	173858542	3150	+	*	0.8165	0.7497	0	0	0	0	0	0.21	0	0.23	0.16	0	0.07	0.07	0	0	0.28	0.74	0	0.5	0.15	0.13
cis_mRNA_dw20k	4814	NA	NONHSAT007706.2	XM_005245546.2	chr1	173895935	173902638	3388	+	chr1	173868297	173891122	6841	+	*	0.9632	0.7697	0.82	0.57	0.78	0.62	1.56	4.39	0.69	1.73	0.68	1.23	1.88	2.28	1.59	0.81	4.18	7.59	1.76	3.18	1.75	2.61
cis_mRNA_dw20k	171	NA	NONHSAT007754.2	XM_011509949.2	chr1	175315197	175320611	5415	-	chr1	175320781	175743702	6817	-	*	0.9365	0.8434	0.02	0	0.03	0.01	0	0.08	0.04	0	0	0.14	0.01	0	0	0.02	0	0.14	0.02	0	0	0.16
cis_mRNA_overlap	0	Lnc-CompleteIn-mRNAExon	NONHSAT007802.2	MTCONS_00026212	chr1	178006925	178037787	1517	-	chr1	178005533	178037947	3524	-	-727.88	0.7313	0.6688	0.5	0	0.22	0.28	0.47	0	0.6	0.2	0	0.31	1.36	1.05	1.57	2.27	3.97	1.47	3.54	1.43	1.16	2.64
cis_mRNA_overlap	0	Lnc-Overlap-mRNA	NONHSAT008274.2	MTCONS_00011992	chr1	180945434	180948463	3030	+	chr1	180913177	180952484	5684	+	*	0.9642	0.7034	0.01	0	0.06	0.02	0.12	0.29	0.05	0.03	0.01	0.03	0.06	0	0.05	0.07	0.19	0.98	0.09	0.03	0.04	0.04
cis_mRNA_overlap	0	Lnc-CompleteIn-mRNAIntron	NONHSAT008410.2	NM_017673.6	chr1	185170108	185172536	2429	+	chr1	185157159	185291781	3846	+	*	0.8565	0.7416	0.14	0.31	0.29	0.09	0.86	0.56	0.38	0.75	0.38	0.2	0.41	0.18	0.66	0	2.04	1.17	0.24	1.27	0.76	0.89
cis_mRNA_overlap	0	Lnc-CompleteIn-mRNAIntron	NONHSAT008410.2	XM_017001530.1	chr1	185170108	185172536	2429	+	chr1	185157023	185266113	4412	+	*	0.649	0.6079	0.14	0.31	0.29	0.09	0.86	0.56	0.38	0.75	0.38	0.2	0.04	0.16	0.07	0.05	0.31	0.21	0.11	0.29	0.09	0.33
cis_mRNA_overlap	0	Lnc-CompleteIn-mRNAIntron	NONHSAT008613.2	NM_018136.4	chr1	197138748	197139307	560	-	chr1	197084127	197146694	10888	-	*	0.9229	0.792	0.05	0	0	0	0.07	0.74	0	0.55	0	0	0.55	1.91	0.34	0.35	2.84	5.8	0.25	4.42	0.81	0
tran	NA	NA	NONHSAT008613.2	NM_207366.2	chr1	197138748	197139307	560	-	chr7	55793544	55862789	3785	-	-253.71	0.8623	0.7699	0.05	0	0	0	0.07	0.74	0	0.55	0	0	0	0	0	0	0	0.02	0	0.04	0	0
cis_mRNA_up10k	1121	NA	NONHSAT008616.2	XM_011509507.2	chr1	197201641	197203085	1445	+	chr1	197166815	197200521	3225	-	*	0.6099	0.6018	0.08	0.06	0.06	0	0.52	0.39	0.04	0.16	0.11	0.32	0.17	0.1	0.38	0.15	0.49	0.27	0.28	0.47	0.16	0.41
cis_mRNA_overlap	0	Lnc-CompleteIn-mRNAIntron	NONHSAT008779.2	MTCONS_00012839	chr1	201895409	201898542	2618	+	chr1	201888658	201900754	2504	+	*	0.9309	0.8164	0	0.01	0.01	0.03	0	0.05	0.01	0.43	0.02	0	0.02	0.05	0.05	0.18	0	0.12	0.03	0.64	0.26	0.08
cis_mRNA_overlap	0	Lnc-Overlap-mRNA	NONHSAT008854.2	MTCONS_00027179	chr1	202851872	202859226	1754	-	chr1	202857281	202861632	1290	-	*	0.8117	0.6955	0.15	0	0.26	0.12	0.09	0.18	0	0.75	0.26	0	0	0.05	0.49	0.39	0.51	1.23	0.09	1.62	1.12	0.2
cis_mRNA_dw20k	7858	NA	NONHSAT009290.2	XM_011509959.2	chr1	211382803	211396864	429	+	chr1	211345348	211374946	5027	+	*	0.7224	0.6305	0	0	0	0	2.86	0	0.39	0	0	0	0.03	0.04	0.02	0.02	0.26	0.08	0.15	0.2	0.02	0.11
cis_mRNA_up10k	4460	NA	NONHSAT009405.2	NM_001024601.2	chr1	212852108	212858098	2535	-	chr1	212830141	212847649	506	-	*	0.9628	0.9246	0.05	0	0	0	0.16	0.35	0	0.05	0.09	0	0	0	0	0	0.39	0.54	0	0.08	0.18	0
cis_mRNA_overlap	0	Lnc-AntiOverlap-mRNA	NONHSAT009442.2	XM_011509773.2	chr1	213894707	213986432	905	-	chr1	213983239	214041253	7788	+	*	0.6974	0.7112	0.33	0.11	0.49	0.57	0	0	0.35	0.22	0.65	0.54	0.83	2.19	2.77	6.56	0.96	0.55	3.61	5.6	5.59	3.9
[truncated: 8,004 more rows]
